# Supplementary material for: Fungi at a Small Scale: Spatial Zonation of Fungal Assemblages around Single Trees
Source: PLoS One. 2013 Oct 16;8(10):e78295. doi: 10.1371/journal.pone.0078295 (PMC3797779; doi:10.1371/journal.pone.0078295)
Supplement: Table S1 — Complete OTU table for all fungi recovered in the study (with respective read abundance). (XLSX) [file pone.0078295.s003.xlsx]

## Sheet: TableS1.txt
Table S1 - Complete OTU table for all fungi recovered in the study (with respective read abundance). Grp - grouped sample; o - outer circle; i - inner circle; a-d - individual samples for inner circles; i-l - individual samples for outer circles; 1,2,3,4,10,11,13,14,16,17 - old trees; 5,6,7,8,9,12,15,18,19,20 - young trees.
OTUs	a3ogrp	a16ogrp	a4j	a4ogrp	a8l	a6ogrp	a17ogrp	a17igrp	a2igrp	a2ogrp	a2b	a7ogrp	a14igrp	a1igrp	a4a	a13igrp	a13ogrp	a1ogrp	a14ogrp	a8ogrp	a20ogrp	a8igrp	a2i	a3igrp	a2c	a4d	a2d	a4k	a4i	a5k	a4l	a120grp	a1i	a11igrp	a18ogrp	a8j.	a19igrp	a1l.	a4igrp	a16igrp	a9igrp	a6igrp	a18igrp	a8c	a5igrp	a1c	a5a	a11ogrp	a9c
('1', '_', 'HM189968|Tomentella_sp_1_BB_2010|Fungi; _Basidiomycota; _Agaricomycotina; _Agaricomycetes; _Incertae_sedis; _Thelephorales; _Thelephoraceae; _Tomentella|-|-')	0	0	0	1	0	0	0	0	0	72	0	0	0	0	0	0	0	0	0	0	0	0	0	0	0	0	0	0	0	0	0	0	0	0	0	0	0	0	69	0	0	0	0	0	0	0	0	0	0
('10', '_', 'HE603989|Xenopolyscytalum_sp_CCF_4159|Fungi; _Ascomycota; _Pezizomycotina; _Leotiomycetes; _Leotiomycetidae; _Helotiales|-|-')	0	5	0	0	0	0	0	4	8	0	15	0	4	6	3	1	1	0	0	0	1	2	1	11	8	9	3	0	1	0	2	1	5	2	0	3	0	0	2	10	0	0	2	1	0	11	0	0	0
('1002', '_', 'UC1860225|Lopharia_cf._spadicea|voucher|-|-')	0	0	0	0	0	0	0	0	0	0	0	0	0	0	0	0	0	0	0	0	1	0	0	0	0	0	0	0	0	0	0	0	0	0	0	0	0	0	0	0	0	0	0	0	0	0	0	0	0
('1016', '_', 'EU847428|Botrytis_sp_B_3|Fungi; _Ascomycota; _Pezizomycotina; _Leotiomycetes; _Leotiomycetidae; _Helotiales; _Sclerotiniaceae; _Botrytis|-|-')	0	0	0	0	0	0	0	0	0	0	0	0	0	0	0	0	0	0	0	0	0	0	0	0	0	0	0	0	0	0	0	0	0	0	1	0	0	0	0	0	0	0	0	0	0	0	0	0	0
('103', '_', 'AJ716305|Sclerotinia_spermophila|Fungi; _Ascomycota; _Pezizomycotina; _Leotiomycetes; _Leotiomycetidae; _Helotiales; _Sclerotiniaceae; _Sclerotinia|-|-')	0	1	0	0	0	0	0	0	0	0	0	0	0	0	0	0	1	1	1	0	0	0	0	0	0	0	0	0	0	0	0	0	0	0	0	0	0	0	0	0	0	3	0	1	1	0	2	0	0
('1031', '_', 'AJ302460|Eutypella_caricae|Fungi; _Ascomycota; _Pezizomycotina; _Sordariomycetes; _Xylariomycetidae; _Xylariales; _Diatrypaceae; _Eutypella|-|-')	0	0	0	0	0	0	0	0	0	0	1	0	0	0	0	0	0	0	0	1	0	0	0	0	0	0	0	0	0	0	0	0	0	0	0	0	0	0	0	0	0	0	0	0	0	0	0	0	0
('1036', '_', 'JF747135|Exophiala_psychrophila|Fungi; _Ascomycota; _Pezizomycotina; _Eurotiomycetes; _Chaetothyriomycetidae; _Chaetothyriales; _Herpotrichiellaceae; _Exophiala|-|-')	0	0	0	0	0	0	0	0	0	0	0	0	0	0	0	0	0	0	2	0	0	0	0	0	0	0	0	0	0	0	0	0	0	0	0	0	0	0	0	0	0	0	0	0	0	0	0	0	0
('1038', '_', 'JF747124|Exophiala_sp_KL_2011e|Fungi; _Ascomycota; _Pezizomycotina; _Eurotiomycetes; _Chaetothyriomycetidae; _Chaetothyriales; _Herpotrichiellaceae; _Exophiala|-|-')	0	0	1	0	0	0	0	0	0	0	0	0	0	0	0	0	0	0	0	0	0	0	0	0	0	0	0	0	0	0	0	0	0	0	0	0	0	0	0	0	0	0	0	0	0	0	0	0	0
('1040', '_', 'FJ515298|Neurospora_tetrasperma|Fungi; _Ascomycota; _Pezizomycotina; _Sordariomycetes; _Sordariomycetidae; _Sordariales; _Sordariaceae; _Neurospora|-|-')	0	0	0	0	0	0	0	0	1	0	0	0	0	0	0	0	0	0	0	0	0	0	0	0	0	0	0	0	0	0	0	0	0	0	0	0	0	0	0	0	0	0	0	0	0	0	0	0	0
('1050', '_', 'AB178481|Sporobolomyces_gracilis|Fungi; _Basidiomycota; _Pucciniomycotina; _Microbotryomycetes; _Incertae_sedis; _Sporidiobolales; _Incertae_sedis; _Sporobolomyces|-|-')	0	0	0	0	0	0	0	0	0	0	0	0	0	0	0	0	0	0	0	0	0	0	0	0	1	0	0	0	0	0	0	0	0	0	0	0	0	0	0	0	0	0	0	0	0	0	0	0	0
('1051', '_', 'AJ878779|Mortierella_horticola|Fungi; _Zygomycota; _Mucoromycotina; _Incertae_sedis; _Incertae_sedis; _Mortierellales; _Mortierellaceae; _Mortierella|-|-')	0	0	0	0	0	0	0	0	0	0	0	0	0	0	0	0	0	0	0	0	0	0	0	0	0	0	0	0	0	0	0	0	0	0	0	0	0	0	0	0	0	0	0	0	0	0	0	0	0
('1060', '_', 'FR837917|Zalerion_arboricola|Fungi; _Ascomycota; _Pezizomycotina; _Sordariomycetes; _Spathulosporomycetidae; _Lulworthiales; _Lulworthiaceae; _Zalerion|-|-')	0	0	0	0	0	0	0	0	0	0	0	0	1	0	0	0	0	0	0	0	0	0	0	0	0	0	0	0	0	0	0	0	0	0	0	0	0	0	0	0	0	0	1	0	0	0	0	0	0
('1064', '_', 'DQ189225|Geomyces_pannorum|Fungi; _Ascomycota; _Pezizomycotina; _Leotiomycetes; _Incertae_sedis; _Incertae_sedis; _Incertae_sedis; _Geomyces|-|-')	0	0	0	0	0	0	0	0	0	0	0	0	0	0	0	0	0	0	0	0	0	0	0	0	0	0	0	0	0	0	0	0	0	0	0	0	0	0	0	0	0	0	0	0	0	0	0	0	2
('1073', '_', 'HQ166513|Penicillium_sp_FL_2010aj|Fungi; _Ascomycota; _Pezizomycotina; _Eurotiomycetes; _Eurotiomycetidae; _Eurotiales; _Trichocomaceae; _Penicillium|-|-')	0	0	0	0	0	0	0	0	0	0	0	0	0	0	0	0	0	0	0	0	0	0	0	0	0	0	0	0	0	0	0	0	0	0	0	0	0	0	0	0	1	0	0	0	0	0	0	0	0
('1074', '_', 'EU853472|Mycosphaerella_aurantia|Fungi; _Ascomycota; _Pezizomycotina; _Dothideomycetes; _Dothideomycetidae; _Capnodiales; _Mycosphaerellaceae; _Mycosphaerella|-|-')	0	0	0	0	0	0	0	0	0	0	0	0	0	0	0	0	0	0	0	0	0	0	0	1	0	0	0	0	0	0	0	0	0	0	0	0	0	0	0	0	0	0	0	0	0	0	0	0	0
('1090', '_', 'EU551195|Preussia_africana|Fungi; _Ascomycota; _Pezizomycotina; _Dothideomycetes; _Pleosporomycetidae; _Pleosporales; _Sporormiaceae; _Preussia|-|-')	0	0	0	0	0	0	0	0	0	0	0	0	0	0	0	0	0	0	0	0	0	0	0	0	0	0	0	0	0	0	0	0	0	0	0	0	0	0	0	0	0	0	0	0	0	0	0	0	0
('1093', '_', 'FM955449|Ramophialophora_sp_FMR_9523|Fungi; _Ascomycota; _Pezizomycotina; _Sordariomycetes; _Sordariomycetidae; _Sordariales; _Incertae_sedis; _Ramophialophora|-|-')	0	0	0	0	0	0	0	0	0	0	0	0	0	0	0	0	0	0	0	0	0	0	0	0	0	0	0	0	0	0	0	0	0	0	0	0	0	0	0	0	0	0	0	0	0	0	0	0	0
('1105', '_', 'DQ914682|Mariannaea_elegans|Fungi; _Ascomycota; _Pezizomycotina; _Sordariomycetes; _Hypocreomycetidae; _Hypocreales; _Nectriaceae; _Mariannaea; _Mariannaea_elegans|-|-')	0	0	0	0	0	0	0	0	0	0	0	0	0	0	0	0	0	0	0	0	0	0	0	1	0	0	0	0	0	0	0	0	0	0	0	0	0	0	0	0	0	0	0	0	0	0	0	0	0
('1106', '_', 'EF063140|Sarcopodium_oculorum|Fungi; _Ascomycota; _Pezizomycotina; _Incertae_sedis; _Incertae_sedis; _Incertae_sedis; _Incertae_sedis; _Sarcopodium|-|-')	0	0	0	0	0	0	0	0	0	0	0	0	0	0	0	0	0	0	0	0	0	0	0	0	1	0	0	0	0	0	0	0	0	1	0	0	0	0	0	0	0	0	0	0	0	0	0	0	0
('1107', '_', 'AM084487|ascomycete_sp_HK_S232|Fungi; _Ascomycota|-|-')	0	0	0	0	0	0	0	0	0	0	0	0	0	0	0	0	0	0	0	0	0	0	0	0	0	0	0	0	0	0	0	0	0	0	0	0	0	0	0	0	0	0	0	0	0	0	0	0	0
('1109', '_', 'AY230245|ascomycete_sp_DGC_2|Fungi; _Ascomycota|-|-')	0	0	0	0	0	0	0	0	0	0	0	0	0	0	0	0	1	0	0	0	0	0	0	0	0	0	0	0	0	0	0	0	0	0	0	0	0	0	0	0	0	0	0	0	0	0	0	0	0
('1114', '_', 'AY465461|Phialophora_sp_GS4N2c(B)|Fungi; _Ascomycota; _Pezizomycotina; _Eurotiomycetes; _Chaetothyriomycetidae; _Chaetothyriales; _Herpotrichiellaceae; _Phialophora|-|-')	0	0	0	0	0	0	0	0	0	0	0	0	0	0	0	0	0	0	0	0	0	0	0	0	0	0	0	0	0	0	0	0	0	0	0	0	0	0	0	0	0	0	1	0	0	0	0	0	0
('1116', '_', 'AM747512|Coniophora_arida|Fungi; _Basidiomycota; _Agaricomycotina; _Agaricomycetes; _Agaricomycetidae; _Boletales; _Coniophoraceae; _Coniophora; _Coniophora_arida|-|-')	0	0	0	0	0	0	0	0	0	0	0	0	0	0	0	0	0	0	0	0	0	0	0	0	0	0	0	0	0	0	0	0	0	1	0	0	0	0	0	0	0	0	0	0	0	0	0	0	0
('1119', '_', 'HQ604607|Inocybe_sororia|Fungi; _Basidiomycota; _Agaricomycotina; _Agaricomycetes; _Agaricomycetidae; _Agaricales; _Cortinariaceae; _Inocybe|-|-')	0	0	0	0	0	0	0	0	0	0	0	0	0	0	0	0	0	0	0	0	0	0	0	0	0	0	0	0	0	0	0	0	0	0	0	0	0	0	0	0	0	0	0	0	0	0	0	0	0
('1138', '_', 'EF619925|Mycosphaerella_sp_EHS201|Fungi; _Ascomycota; _Pezizomycotina; _Dothideomycetes; _Dothideomycetidae; _Capnodiales; _Mycosphaerellaceae; _Mycosphaerella|-|-')	0	0	0	0	0	0	0	0	0	0	0	0	0	0	0	0	0	0	0	0	0	0	0	0	0	0	0	0	0	0	0	0	0	0	0	0	0	0	0	0	0	0	0	0	0	1	0	0	0
('1139', '_', 'HM589286|Leucosporidiella_sp_BEA_2010|Fungi; _Basidiomycota; _Pucciniomycotina; _Microbotryomycetes; _Incertae_sedis; _Leucosporidiales; _Leucosporidiaceae; _Leucosporidiella|-|-')	0	0	0	0	0	0	0	0	0	0	0	0	0	0	0	0	0	0	0	0	0	0	0	0	1	0	0	0	0	0	0	0	0	1	0	0	0	0	0	1	0	0	0	0	0	0	0	0	0
('1150', '_', 'AF444525|Rhodotorula_fujisanensis|Fungi; _Basidiomycota; _Pucciniomycotina; _Microbotryomycetes; _Incertae_sedis; _Sporidiobolales; _Incertae_sedis; _Rhodotorula|-|-')	0	0	0	0	0	0	0	0	0	0	0	0	0	0	1	0	0	0	0	0	0	0	0	0	0	0	0	0	0	0	0	0	0	0	0	0	0	0	0	0	0	0	0	0	0	0	0	0	0
('1151', '_', 'AB180360|Exobasidium_woronichinii|Fungi; _Basidiomycota; _Ustilaginomycotina; _Exobasidiomycetes; _Incertae_sedis; _Exobasidiales; _Exobasidiaceae; _Exobasidium|-|-')	0	0	0	0	0	0	0	0	0	0	0	0	0	0	0	0	0	0	0	0	0	0	0	0	0	0	0	0	0	0	0	0	0	0	0	0	0	0	0	0	0	0	0	0	0	0	0	0	0
('116', '_', 'HQ215822|Tomentella_sp_OTU221|Fungi; _Basidiomycota; _Agaricomycotina; _Agaricomycetes; _Incertae_sedis; _Thelephorales; _Thelephoraceae; _Tomentella|-|-')	0	0	0	0	0	0	0	0	0	0	0	0	0	0	0	0	0	0	0	0	0	0	0	0	0	0	0	0	0	0	0	0	0	0	0	0	0	0	0	0	0	0	0	0	0	0	0	0	0
('1168', '_', 'UC1859411|Mycena_sp.|voucher|-|-')	0	0	0	0	0	0	0	0	0	0	0	0	0	0	0	0	0	0	0	0	0	0	0	0	0	0	0	0	0	0	0	0	0	0	0	0	0	1	0	0	0	0	0	0	0	0	0	0	0
('117', '_', 'AY559355|melanized_limestone_ascomycete_CR_2004|Fungi; _Ascomycota|-|-')	0	1	0	0	0	1	0	0	0	0	0	0	0	0	0	0	0	0	0	0	0	0	0	0	0	0	0	0	0	0	0	0	0	0	0	0	0	0	0	0	0	0	0	0	0	0	0	0	0
('1174', '_', 'FJ439581|Acremonium_sp_GMG_C7|Fungi; _Ascomycota; _Pezizomycotina; _Sordariomycetes; _Hypocreomycetidae; _Hypocreales; _Incertae_sedis; _Acremonium|-|-')	0	0	0	0	1	0	0	0	0	0	0	0	0	0	0	1	0	0	0	0	0	0	0	0	0	0	0	0	0	0	0	0	0	0	0	0	0	0	0	0	0	0	0	0	0	0	0	0	0
('1176', '_', 'EU719533|Aureobasidium_pullulans|Fungi; _Ascomycota; _Pezizomycotina; _Dothideomycetes; _Dothideomycetidae; _Dothideales; _Dothioraceae; _Aureobasidium; _Aureobasidium_pullulans|-|-')	0	0	0	0	0	0	0	0	0	0	0	0	0	0	0	0	0	0	0	0	1	0	0	0	0	0	0	0	0	0	0	0	0	0	0	0	0	0	0	0	0	0	0	0	0	0	0	0	0
('118', '_', 'HM036588|Chalara_microchona|Fungi; _Ascomycota; _Pezizomycotina; _Incertae_sedis; _Incertae_sedis; _Incertae_sedis; _Incertae_sedis; _Chalara|-|-')	0	0	0	0	0	1	0	0	0	0	0	1	1	0	0	0	0	0	0	0	1	0	0	0	0	0	0	0	0	0	0	0	0	0	0	0	0	0	0	0	0	1	2	0	0	0	2	0	0
('1186', '_', 'AY880938|Suillus_pseudobrevipes|Fungi; _Basidiomycota; _Agaricomycotina; _Agaricomycetes; _Agaricomycetidae; _Boletales; _Suillaceae; _Suillus|Suillus|Fungi; _Basidiomycota; _Agaricomycotina; _Agaricomycetes; _Agaricomycetidae; _Boletales; _Suillaceae; _Suillus')	0	0	0	0	0	0	0	0	0	0	0	0	0	0	0	0	0	0	0	0	0	0	0	0	0	0	0	0	0	0	0	0	0	0	0	0	0	0	0	0	0	0	0	2	0	0	0	0	0
('119', '_', 'DQ093652|Rhizoctonia_sp_aurim1208|Fungi; _Basidiomycota; _Agaricomycotina; _Agaricomycetes; _Incertae_sedis; _Corticiales; _Corticiaceae; _Rhizoctonia|-|-')	0	0	3	0	0	5	0	0	0	0	0	0	0	0	0	0	0	0	0	0	0	0	0	0	0	0	0	0	0	4	0	0	0	0	0	0	0	0	0	0	0	0	0	0	0	0	0	0	0
('1208', '_', 'HQ604765|Mycena_purpureofusca|Fungi; _Basidiomycota; _Agaricomycotina; _Agaricomycetes; _Agaricomycetidae; _Agaricales; _Mycenaceae; _Mycena; _Mycena_purpureofusca|-|-')	0	0	0	0	0	0	0	0	0	0	0	0	0	0	0	0	0	0	0	0	0	0	0	1	0	0	0	0	0	0	0	0	0	0	0	0	0	0	0	0	0	0	0	0	0	0	0	0	0
('1210', '_', 'GQ369959|Pochonia_chlamydosporia|Fungi; _Ascomycota; _Pezizomycotina; _Sordariomycetes; _Hypocreomycetidae; _Hypocreales; _Clavicipitaceae; _Pochonia|-|-')	0	0	0	0	0	0	0	0	0	0	1	0	0	0	0	0	0	0	0	0	0	0	0	0	0	0	0	0	0	0	0	0	0	1	0	0	0	0	0	0	0	0	0	0	0	0	0	0	0
('1219', '_', 'GU934500|Alternaria_sp_OTU890|Fungi; _Ascomycota; _Pezizomycotina; _Dothideomycetes; _Pleosporomycetidae; _Pleosporales; _Pleosporaceae; _Alternaria|-|-')	0	0	0	0	0	0	0	0	0	0	0	0	0	0	0	0	0	0	0	0	0	0	0	0	0	0	0	0	0	0	0	0	0	0	0	0	0	0	0	0	0	0	0	0	0	0	4	0	0
('1220', '_', 'AY204589|Alatospora_acuminata|Fungi; _Ascomycota; _Pezizomycotina; _Leotiomycetes; _Leotiomycetidae; _Leotiales; _Leotiaceae; _Alatospora|-|-')	0	0	0	0	0	0	0	0	0	0	0	0	0	0	0	0	0	0	0	0	0	0	0	0	0	0	0	8	0	0	0	0	0	0	0	0	0	0	0	0	0	0	0	0	0	0	0	0	0
('1223', '_', 'FN435802|Ascomycota_sp_agrAR118|Fungi; _Ascomycota|-|-')	1	0	0	1	0	0	0	0	0	0	0	0	0	0	0	0	0	0	0	0	0	0	0	0	0	1	1	0	0	0	0	0	1	0	0	0	0	0	0	0	0	1	0	0	0	0	0	0	0
('1225', '_', 'DQ779783|Penicillium_inflatum|Fungi; _Ascomycota; _Pezizomycotina; _Eurotiomycetes; _Eurotiomycetidae; _Eurotiales; _Trichocomaceae; _Penicillium|-|-')	3	0	0	0	0	0	0	0	0	0	0	0	0	0	0	0	0	1	0	0	0	0	0	0	0	0	0	0	0	0	0	0	0	0	0	0	0	0	0	0	0	0	0	0	0	0	0	0	0
('1227', '_', 'AJ430206|Phialocephala_sp_ARON2913S|Fungi; _Ascomycota; _Pezizomycotina; _Leotiomycetes; _Leotiomycetidae; _Helotiales; _Vibrisseaceae; _Phialocephala|-|-')	0	0	0	0	0	0	0	0	1	0	0	0	0	0	0	0	0	0	0	0	1	0	0	0	0	0	0	0	0	0	0	0	0	0	0	0	1	0	0	0	0	0	1	0	0	0	0	0	0
('1233', '_', 'AF486122|Phialocephala_fusca|Fungi; _Ascomycota; _Pezizomycotina; _Leotiomycetes; _Leotiomycetidae; _Helotiales; _Vibrisseaceae; _Phialocephala|-|-')	0	0	0	0	0	0	0	0	0	0	0	0	0	0	0	0	0	0	0	0	0	0	0	0	0	0	0	0	0	0	0	0	0	5	0	0	0	0	0	0	0	0	0	0	0	0	0	0	0
('124', '_', 'AF444357|Cryptococcus_sp_PYCC_4964|Fungi; _Basidiomycota; _Agaricomycotina; _Tremellomycetes; _Incertae_sedis; _Filobasidiales; _Filobasidiaceae; _Cryptococcus|-|-')	0	0	2	1	0	0	0	0	0	0	0	0	0	1	5	0	0	0	0	0	0	0	0	0	1	1	0	0	0	0	0	0	0	0	0	1	0	0	0	0	0	0	0	0	0	0	0	0	0
('1244', '_', 'EF694655|Hypocreales_sp_Vega851|Fungi; _Ascomycota; _Pezizomycotina; _Sordariomycetes; _Hypocreomycetidae; _Hypocreales|-|-')	0	0	0	0	0	0	0	0	0	0	0	0	0	0	0	0	0	1	1	0	0	0	0	0	0	0	0	0	0	0	0	1	0	1	0	0	0	0	0	0	1	0	0	0	0	0	0	0	3
('1245', '_', 'JF440615|Sarea_resinae|Fungi; _Ascomycota; _Pezizomycotina; _Lecanoromycetes; _Ostropomycetidae; _Agyriales; _Agyriaceae; _Sarea; _Sarea_resinae|-|-')	0	0	0	1	0	0	0	0	0	0	0	0	0	0	0	1	0	0	0	0	0	0	0	0	1	0	0	0	0	0	0	0	0	0	0	0	0	0	1	1	0	0	0	0	1	1	0	0	0
('1249', '_', 'AY805600|ascomycete_sp_olrim457|Fungi; _Ascomycota|-|-')	0	0	0	0	0	1	0	0	0	1	0	0	2	0	0	0	1	0	1	0	1	0	0	0	0	0	0	0	0	0	0	0	1	0	0	0	0	0	0	0	0	0	0	0	0	0	0	0	0
('125', '_', 'HQ667543|Scolecobasidium_excentricum|Fungi; _Ascomycota; _Pezizomycotina; _Incertae_sedis; _Incertae_sedis; _Incertae_sedis; _Incertae_sedis; _Scolecobasidium|-|-')	0	0	0	0	0	1	0	0	0	6	0	0	0	0	0	0	0	0	0	0	0	3	0	0	0	0	0	0	0	0	0	0	0	0	0	0	0	0	0	0	0	0	0	0	0	0	0	0	0
('1254', '_', 'AY805543|zygomycete_sp_olrim272|Fungi|-|-')	0	1	0	0	0	1	0	0	0	1	0	0	1	0	0	0	0	0	0	0	1	0	0	0	0	0	0	0	0	1	0	0	0	0	0	0	0	0	0	0	0	0	0	0	0	0	0	0	0
('1256', '_', 'FN386289|Trichocladium_sp_3316|Fungi; _Ascomycota; _Pezizomycotina; _Sordariomycetes; _Sordariomycetidae; _Sordariales; _Chaetomiaceae; _Trichocladium|-|-')	0	0	0	0	0	0	0	0	0	0	0	0	0	0	0	0	0	0	0	0	1	0	0	0	0	0	0	0	0	0	0	0	0	0	0	0	0	0	0	0	0	0	0	0	0	0	0	0	0
('1265', '_', 'FN386299|Trichocladium_opacum|Fungi; _Ascomycota; _Pezizomycotina; _Sordariomycetes; _Sordariomycetidae; _Sordariales; _Chaetomiaceae; _Trichocladium; _Trichocladium_opacum|-|-')	0	0	0	1	0	1	0	0	0	0	0	0	0	0	0	0	0	0	0	0	2	0	1	0	0	0	0	0	0	0	0	0	0	0	1	0	1	0	0	0	0	0	1	0	0	0	0	0	0
('1267', '_', 'DQ667163|Itersonilia_perplexans|Fungi; _Basidiomycota; _Agaricomycotina; _Tremellomycetes; _Incertae_sedis; _Cystofilobasidiales; _Cystofilobasidiaceae; _Itersonilia|-|-')	0	0	0	0	0	0	0	0	0	0	0	0	0	0	0	0	0	0	1	0	0	0	0	0	0	0	0	0	0	0	0	0	0	0	0	0	0	0	0	0	0	0	0	0	0	0	0	0	0
('127', '_', 'JF834359|Russula_aff_brevipes_r_05016|Fungi; _Basidiomycota; _Agaricomycotina; _Agaricomycetes; _Incertae_sedis; _Russulales; _Russulaceae; _Russula|-|-')	0	0	0	0	0	0	0	0	0	0	0	0	0	0	0	0	0	0	0	0	0	0	0	0	0	0	0	0	0	0	0	0	0	0	0	0	0	0	0	0	0	0	0	0	0	0	0	0	0
('1270', '_', 'AB199600|Umbelopsis_isabellina|Fungi; _Zygomycota; _Mucoromycotina; _Incertae_sedis; _Incertae_sedis; _Mucorales; _Umbelopsidaceae; _Umbelopsis; _Umbelopsis_isabellina|-|-')	0	0	0	0	0	0	0	0	1	0	1	0	0	0	0	0	0	0	0	0	0	0	0	0	0	0	0	0	0	0	0	0	0	0	0	0	0	0	0	0	0	0	0	0	0	0	0	0	0
('1271', '_', 'DQ914694|Chaetothyriales_sp_EXP0392F|Fungi; _Ascomycota; _Pezizomycotina; _Eurotiomycetes; _Chaetothyriomycetidae; _Chaetothyriales|-|-')	0	0	0	0	0	0	0	0	0	0	0	0	0	0	0	0	0	0	0	0	0	0	0	0	0	1	0	0	0	1	0	0	0	0	0	0	0	0	0	0	0	0	1	0	0	0	0	0	0
('1272', '_', 'FN394725|Mortierella_sp_3584|Fungi; _Zygomycota; _Mucoromycotina; _Incertae_sedis; _Incertae_sedis; _Mortierellales; _Mortierellaceae; _Mortierella|-|-')	0	0	0	0	0	0	0	0	0	0	0	0	0	0	0	0	0	0	0	0	0	0	0	0	0	0	0	0	0	1	0	0	1	0	0	0	0	0	0	0	0	0	0	0	0	0	0	0	0
('1276', '_', 'AF395309|Exidiopsis_plumbescens|Fungi; _Basidiomycota; _Agaricomycotina; _Tremellomycetes; _Incertae_sedis; _Tremellales; _Exidiaceae; _Exidiopsis|-|-')	0	0	0	0	0	0	0	0	0	0	1	0	0	0	0	0	0	0	0	0	0	0	0	0	0	0	0	0	0	0	0	1	0	0	0	0	0	0	0	0	0	0	0	0	0	0	0	0	0
('1279', '_', 'GU566269|Leptosphaerulina_chartarum|Fungi; _Ascomycota; _Pezizomycotina; _Dothideomycetes; _Pleosporomycetidae; _Pleosporales; _Pleosporaceae; _Leptosphaerulina|-|-')	0	0	6	0	0	0	0	0	0	0	0	0	0	0	0	0	0	0	0	0	0	0	0	0	0	0	0	1	0	0	0	0	0	0	0	0	0	0	0	0	0	0	0	0	0	0	0	0	0
('128', '_', 'AY902794|Dactylella_mammillata|Fungi; _Ascomycota; _Pezizomycotina; _Orbiliomycetes; _Orbiliomycetidae; _Orbiliales; _Orbiliaceae; _Dactylella|-|-')	0	0	0	0	0	0	0	0	0	0	0	0	0	0	0	0	0	0	0	0	0	0	0	0	0	0	0	0	0	0	0	0	1	0	0	0	0	1	0	0	3	0	0	0	0	0	0	0	4
('1282', '_', 'EU680538|leotiomycete_sp_7669|Fungi; _Ascomycota; _Pezizomycotina; _Leotiomycetes|-|-')	0	0	0	0	0	0	0	0	0	0	0	0	0	1	0	0	0	0	0	0	0	0	0	1	1	0	0	0	0	0	0	0	0	0	0	0	0	0	1	0	0	0	0	0	0	2	0	0	0
('1283', '_', 'EU196536|Polyscytalum_pustulans|Fungi; _Ascomycota; _Pezizomycotina; _Incertae_sedis; _Incertae_sedis; _Incertae_sedis; _Incertae_sedis; _Polyscytalum; _Polyscytalum_pustulans|-|-')	0	0	0	0	0	0	0	0	0	0	0	0	2	0	0	0	0	3	0	0	1	2	0	0	0	0	0	0	0	0	0	0	0	0	0	0	0	0	0	0	0	0	0	0	0	0	0	0	0
('1285', '_', 'AF444361|Cryptococcus_sp_PYCC_5266|Fungi; _Basidiomycota; _Agaricomycotina; _Tremellomycetes; _Incertae_sedis; _Filobasidiales; _Filobasidiaceae; _Cryptococcus|-|-')	0	0	0	0	0	0	0	0	0	0	0	0	1	0	1	0	0	0	0	0	0	0	0	0	0	0	0	2	0	0	0	0	0	0	0	0	0	0	1	0	0	0	0	0	0	0	0	0	0
('1286', '_', 'EU041776|Myrmecridium_schulzeri|Fungi; _Ascomycota; _Pezizomycotina; _Sordariomycetes; _Incertae_sedis; _Incertae_sedis; _Incertae_sedis; _Myrmecridium|-|-')	0	0	0	0	1	0	0	0	0	1	0	0	0	0	0	0	0	0	0	0	1	1	1	0	0	0	0	0	0	1	0	0	0	0	0	0	0	0	0	0	0	0	0	0	0	0	0	0	1
('1288', '_', 'HQ115713|Massarina_rubi|Fungi; _Ascomycota; _Pezizomycotina; _Dothideomycetes; _Pleosporomycetidae; _Pleosporales; _Lophiostomataceae; _Massarina|-|-')	0	0	0	0	0	0	0	0	0	0	0	6	0	0	0	0	0	0	0	0	0	0	0	0	0	0	0	0	0	0	0	0	0	0	0	0	0	0	0	0	0	0	0	0	0	0	0	0	0
('1291', '_', 'HQ608029|Ascomycota_sp_AR_2010|Fungi; _Ascomycota|-|-')	0	0	0	0	0	0	0	0	0	0	0	0	0	0	0	0	0	0	1	0	0	0	0	0	0	0	0	0	0	0	0	2	0	0	0	0	0	0	0	0	0	0	0	0	0	0	0	0	0
('1298', '_', 'HQ604752|Galerina_cf_pallidispora_UBC_F19737|Fungi; _Basidiomycota; _Agaricomycotina; _Agaricomycetes; _Agaricomycetidae; _Agaricales; _Cortinariaceae; _Galerina|-|-')	0	0	1	0	0	0	0	0	0	0	0	0	0	0	0	0	0	1	0	0	0	0	0	0	0	0	0	0	0	0	0	0	0	0	0	0	0	0	0	0	0	0	0	0	0	0	0	0	0
('1299', '_', 'FJ000374|Tetracladium_setigerum|Fungi; _Ascomycota; _Pezizomycotina; _Leotiomycetes; _Leotiomycetidae; _Helotiales; _Incertae_sedis; _Tetracladium; _Tetracladium_setigerum|-|-')	0	0	0	0	0	0	0	0	0	0	0	0	0	0	0	0	0	0	0	0	0	0	0	0	0	0	0	0	0	1	1	0	0	0	0	0	0	0	0	0	0	0	0	0	0	0	2	0	0
('13', '_', 'HQ630307|Mortierella_cf_gamsii_CBS_31452|Fungi; _Zygomycota; _Mucoromycotina; _Incertae_sedis; _Incertae_sedis; _Mortierellales; _Mortierellaceae; _Mortierella|-|-')	0	0	0	0	1	3	1	0	0	0	0	10	0	0	0	0	1	0	1	4	0	0	0	0	0	0	0	0	0	0	0	0	0	0	64	8	0	0	0	0	1	0	0	0	0	0	0	0	1
('1302', '_', 'HQ630351|Mortierella_pulchella|Fungi; _Zygomycota; _Mucoromycotina; _Incertae_sedis; _Incertae_sedis; _Mortierellales; _Mortierellaceae; _Mortierella|-|-')	0	0	0	0	0	0	0	0	7	0	4	0	0	2	1	0	0	0	0	0	0	0	5	26	4	6	15	0	0	0	1	0	0	0	0	0	0	0	0	0	0	1	0	0	0	1	0	0	0
('1303', '_', 'GU004208|Phialophora_sp_Maitri|Fungi; _Ascomycota; _Pezizomycotina; _Eurotiomycetes; _Chaetothyriomycetidae; _Chaetothyriales; _Herpotrichiellaceae; _Phialophora|-|-')	0	0	0	0	1	0	0	1	0	0	0	5	0	0	0	0	0	0	1	2	0	7	0	0	0	0	0	0	0	0	0	0	0	0	0	1	1	0	0	0	0	6	10	8	2	0	2	1	0
('1307', '_', 'FR648375|Epicoccum_nigrum|Fungi; _Ascomycota; _Pezizomycotina; _Dothideomycetes; _Pleosporomycetidae; _Pleosporales; _Pleosporaceae; _Epicoccum; _Epicoccum_nigrum|-|-')	1	0	2	1	1	0	0	0	2	2	0	1	0	2	4	0	2	2	0	1	3	10	3	6	5	1	0	3	0	1	0	0	0	0	8	0	0	0	4	0	1	1	4	1	1	2	0	0	0
('1308', '_', 'AJ515397|Rhizopogon_sp_SNFA30_1|Fungi; _Basidiomycota; _Agaricomycotina; _Agaricomycetes; _Agaricomycetidae; _Boletales; _Rhizopogonaceae; _Rhizopogon|Rhizopogon|Fungi; _Basidiomycota; _Agaricomycotina; _Agaricomycetes; _Agaricomycetidae; _Boletales; _Rhizopogonaceae; _Rhizopogon')	0	0	0	0	1	0	0	0	0	0	0	1	0	0	0	0	0	0	0	1	1	0	0	0	0	0	0	0	0	0	0	0	0	0	0	0	0	0	0	0	0	0	0	0	0	0	0	0	0
('1309', '_', 'EU428774|zygomycete_sp_AM_2008a|Fungi|-|-')	1	0	7	1	0	29	0	0	0	0	0	0	0	0	0	0	0	0	0	0	0	0	0	0	0	3	0	0	0	5	2	0	0	0	0	0	0	0	0	0	0	1	0	0	0	0	0	0	0
('1313', '_', 'FN678833|Pezizomycetes_sp_GF3P1a|Fungi; _Ascomycota; _Pezizomycotina; _Pezizomycetes|-|-')	0	0	0	0	0	0	0	0	0	0	0	0	1	19	0	0	0	0	0	0	0	0	0	1	1	0	1	0	0	0	0	0	0	0	0	0	0	0	0	0	0	0	0	0	0	40	0	0	0
('1314', '_', 'FN669265|Thelephoraceae_sp_P055|Fungi; _Basidiomycota; _Agaricomycotina; _Agaricomycetes; _Incertae_sedis; _Thelephorales; _Thelephoraceae|-|-')	0	0	0	0	0	0	0	0	0	0	0	0	0	0	0	0	0	0	0	0	0	0	0	0	0	0	0	0	0	0	0	0	0	0	0	0	0	0	0	0	8	0	0	1	0	0	0	0	25
('1316', '_', 'AB378554|Pochonia_bulbillosa|Fungi; _Ascomycota; _Pezizomycotina; _Sordariomycetes; _Hypocreomycetidae; _Hypocreales; _Clavicipitaceae; _Pochonia|-|-')	1	0	0	1	0	2	0	0	2	0	7	0	2	2	0	0	0	0	0	0	0	1	1	2	4	1	3	2	4	0	1	0	1	0	0	0	0	0	0	0	0	1	0	0	0	2	0	0	0
('1319', '_', 'KGP79|Inocybe_sp._79|voucher|-|-')	1	0	0	0	0	0	0	0	0	0	0	0	0	0	0	0	0	0	0	0	0	0	0	0	1	0	0	0	0	0	0	0	0	0	0	0	0	0	0	0	0	0	0	0	9	0	0	0	0
('1320', '_', 'DQ482015|Tomentella_sublilacina|Fungi; _Basidiomycota; _Agaricomycotina; _Agaricomycetes; _Incertae_sedis; _Thelephorales; _Thelephoraceae; _Tomentella; _Tomentella_sublilacina|Tomentella_sublilacina|Fungi; _Basidiomycota; _Agaricomycotina; _Agaricomycetes; _Incertae_sedis; _Thelephorales; _Thelephoraceae; _Tomentella; _Tomentella_sublilacina')	0	0	0	0	0	0	0	0	65	0	38	0	84	107	0	0	0	1	0	6	0	49	0	0	0	0	127	0	0	0	0	30	0	0	0	0	0	0	0	75	23	0	0	0	0	0	0	0	0
('1321', '_', 'EU484279|Mortierella_parvispora|Fungi; _Zygomycota; _Mucoromycotina; _Incertae_sedis; _Incertae_sedis; _Mortierellales; _Mortierellaceae; _Mortierella|-|-')	0	0	0	4	0	0	0	7	26	4	35	0	8	4	2	1	4	13	0	0	0	35	19	15	0	9	24	0	38	0	1	0	30	7	0	0	1	1	3	24	12	5	0	0	0	8	0	0	0
('1324', '_', 'FJ791126|Cladosporium_cladosporioides|Fungi; _Ascomycota; _Pezizomycotina; _Dothideomycetes; _Dothideomycetidae; _Capnodiales; _Mycosphaerellaceae; _Cladosporium; _Cladosporium_cladosporioides|-|-')	0	4	4	3	1	12	0	0	1	11	2	17	1	5	0	16	19	17	8	4	6	4	35	2	12	5	2	8	5	1	0	10	3	14	3	4	0	14	0	1	2	1	1	0	1	4	0	13	7
('1328', '_', 'AB272120|Gibberella_avenacea|Fungi; _Ascomycota; _Pezizomycotina; _Sordariomycetes; _Hypocreomycetidae; _Hypocreales; _Nectriaceae; _Gibberella; _Gibberella_avenacea|-|-')	0	5	1	0	0	6	0	0	2	1	0	2	4	2	0	1	5	3	1	3	5	5	4	4	8	21	1	0	2	3	0	1	1	1	1	0	2	5	6	37	1	2	4	6	8	4	8	3	1
('1329', '_', 'HQ215821|Tomentella_sp_OTU220|Fungi; _Basidiomycota; _Agaricomycotina; _Agaricomycetes; _Incertae_sedis; _Thelephorales; _Thelephoraceae; _Tomentella|-|-')	0	0	0	0	157	0	0	0	0	0	0	0	0	0	0	0	0	0	0	34	0	0	0	0	0	0	0	0	0	0	0	0	0	0	0	0	0	0	0	0	0	0	0	0	0	0	0	0	0
('133', '_', 'JN687968|Penicillium_sp_BM14311|Fungi; _Ascomycota; _Pezizomycotina; _Eurotiomycetes; _Eurotiomycetidae; _Eurotiales; _Trichocomaceae; _Penicillium|-|-')	0	3	0	0	0	0	0	0	2	0	0	0	0	1	0	0	0	1	0	0	1	0	0	0	0	0	0	0	0	0	0	0	0	0	0	0	0	0	0	0	0	0	0	0	0	0	0	0	0
('1333', '_', 'HQ604350|Inocybe_pusio|Fungi; _Basidiomycota; _Agaricomycotina; _Agaricomycetes; _Agaricomycetidae; _Agaricales; _Cortinariaceae; _Inocybe; _Inocybe_pusio|-|-')	0	89	0	0	0	0	0	6	0	0	0	0	0	0	0	0	0	0	0	0	0	0	0	0	0	0	0	0	0	0	0	0	0	0	0	0	0	0	34	0	0	0	0	0	0	0	0	0	0
('1334', '_', 'EF029235|Pseudaegerita_viridis|Fungi; _Ascomycota; _Pezizomycotina; _Leotiomycetes; _Leotiomycetidae; _Helotiales; _Hyaloscyphaceae; _Pseudaegerita|-|-')	0	38	0	11	0	0	0	0	0	0	0	3	0	0	0	0	0	0	0	0	10	2	0	0	0	0	0	4	10	6	20	0	2	0	4	0	6	0	1	0	0	0	3	1	0	1	2	0	0
('1336', '_', 'AM498407|Hypocrea_viridescens|Fungi; _Ascomycota; _Pezizomycotina; _Sordariomycetes; _Hypocreomycetidae; _Hypocreales; _Hypocreaceae; _Hypocrea|-|-')	6	0	2	0	0	1	0	0	12	1	16	0	0	6	0	0	0	1	0	0	0	0	3	10	15	6	2	0	0	0	0	1	3	0	0	0	2	11	0	0	1	5	2	2	0	7	0	0	14
('134', '_', 'AY245542|Russula_californiensis|Fungi; _Basidiomycota; _Agaricomycotina; _Agaricomycetes; _Incertae_sedis; _Russulales; _Russulaceae; _Russula|-|-')	0	0	0	0	0	0	0	0	0	0	0	0	0	6	0	0	0	0	0	0	0	0	0	0	0	0	0	0	0	0	0	0	0	0	0	0	0	0	0	0	0	0	0	0	0	15	0	0	0
('1343', '_', 'GU934501|Alternaria_sp_OTU1090|Fungi; _Ascomycota; _Pezizomycotina; _Dothideomycetes; _Pleosporomycetidae; _Pleosporales; _Pleosporaceae; _Alternaria|-|-')	0	0	1	0	0	0	0	0	0	0	0	0	0	0	0	0	0	0	2	0	0	0	0	0	0	0	0	0	0	0	0	0	0	0	0	0	0	0	0	0	0	0	0	0	0	0	0	0	0
('1347', '_', 'JF694936|Nigrospora_sp_ZJ_2008018|Fungi; _Ascomycota; _Pezizomycotina; _Sordariomycetes; _Incertae_sedis; _Trichosphaeriales; _Incertae_sedis; _Nigrospora|-|-')	0	0	0	0	0	0	0	0	0	0	0	0	0	0	0	0	1	0	0	1	0	0	1	2	0	0	0	0	2	0	0	1	0	0	0	0	0	0	0	0	0	0	0	0	0	0	1	0	0
('1352', '_', 'AF125940|Penicillium_sp_NRRL_28144|Fungi; _Ascomycota; _Pezizomycotina; _Eurotiomycetes; _Eurotiomycetidae; _Eurotiales; _Trichocomaceae; _Penicillium|-|-')	0	0	0	0	0	4	0	0	0	0	0	0	0	0	0	0	0	0	0	0	0	0	0	0	0	0	0	0	0	0	0	0	0	0	1	0	0	0	0	0	0	1	0	0	0	0	0	0	0
('1355', '_', 'AF444580|Sporobolomyces_tsugae|Fungi; _Basidiomycota; _Pucciniomycotina; _Microbotryomycetes; _Incertae_sedis; _Sporidiobolales; _Incertae_sedis; _Sporobolomyces|-|-')	0	1	0	0	0	0	0	0	0	0	0	0	0	0	0	0	0	0	0	1	0	1	1	0	0	0	0	0	0	0	0	0	0	0	0	0	0	0	0	0	0	0	0	0	0	0	0	1	0
('1359', '_', 'AJ557723|Fusarium_sp_88|Fungi; _Ascomycota; _Pezizomycotina; _Sordariomycetes; _Hypocreomycetidae; _Hypocreales; _Nectriaceae; _Fusarium|-|-')	0	0	0	0	0	0	0	0	0	0	0	0	0	0	0	0	0	0	0	1	0	0	1	3	0	0	1	0	0	0	0	0	0	0	0	0	0	0	0	0	0	0	0	0	0	0	0	0	1
('1362', '_', 'DQ822819|Lactarius_cf_luculentus_KGP76|Fungi; _Basidiomycota; _Agaricomycotina; _Agaricomycetes; _Incertae_sedis; _Russulales; _Russulaceae; _Lactarius|-|-')	0	0	0	0	0	0	0	0	8	0	0	0	0	0	0	4	0	0	0	0	0	0	0	0	4	0	9	0	0	0	0	0	0	0	0	0	0	0	0	0	0	0	1	0	0	0	0	0	0
('1365', '_', 'EU128601|Penicillium_glabrum|Fungi; _Ascomycota; _Pezizomycotina; _Eurotiomycetes; _Eurotiomycetidae; _Eurotiales; _Trichocomaceae; _Penicillium; _Penicillium_glabrum|-|-')	0	3	1	0	1	0	0	0	4	3	12	0	1	4	0	2	2	2	0	3	0	0	1	2	1	3	0	0	0	1	0	0	0	0	0	0	1	5	1	0	0	0	0	0	0	0	0	0	0
('1367', '_', 'AB598093|Helotiales_sp_SC3_4|Fungi; _Ascomycota; _Pezizomycotina; _Leotiomycetes; _Leotiomycetidae; _Helotiales|-|-')	0	0	0	0	0	0	0	0	5	4	2	0	0	2	1	0	1	0	0	0	0	0	0	3	3	2	4	0	0	0	0	0	0	0	0	0	0	0	1	0	0	0	0	0	0	3	0	0	0
('1368', '_', 'AY204589|Alatospora_acuminata|Fungi; _Ascomycota; _Pezizomycotina; _Leotiomycetes; _Leotiomycetidae; _Leotiales; _Leotiaceae; _Alatospora|-|-')	0	0	0	0	0	2	1	0	0	1	0	1	0	0	0	0	1	1	2	2	2	0	0	0	0	0	0	2	0	0	0	0	0	0	1	5	0	0	0	0	1	0	7	0	0	0	0	0	0
('1369', '_', 'HQ157957|Hyaloscyphaceae_sp_IV_GK_2010|Fungi; _Ascomycota; _Pezizomycotina; _Leotiomycetes; _Leotiomycetidae; _Helotiales; _Hyaloscyphaceae|-|-')	1	0	0	0	0	0	0	0	10	0	14	0	0	0	1	0	0	0	0	0	0	0	0	3	1	1	0	0	0	0	0	0	0	0	0	0	0	0	0	0	0	0	0	0	0	1	0	0	0
('1370', '_', 'EF458013|Wilcoxina_sp_R3193|Fungi; _Ascomycota; _Pezizomycotina; _Pezizomycetes; _Pezizomycetidae; _Pezizales; _Pyronemataceae; _Wilcoxina|-|-')	0	0	0	0	0	0	0	0	0	0	0	0	0	0	0	0	0	0	0	0	0	0	0	0	0	0	0	0	0	0	0	0	0	16	0	0	0	0	0	0	0	0	0	0	0	0	0	0	1
('1374', '_', 'EU520079|Sarocladium_strictum|Fungi; _Ascomycota; _Pezizomycotina; _Sordariomycetes; _Hypocreomycetidae; _Hypocreales; _Incertae_sedis; _Sarocladium|-|-')	0	0	0	0	0	0	0	0	0	0	0	0	1	0	0	1	1	2	0	0	1	0	0	0	1	0	0	0	0	0	0	2	3	2	0	0	0	2	0	0	0	0	0	0	0	0	0	2	0
('1375', '_', 'JN617682|Penicillium_cosmopolitanum|Fungi; _Ascomycota; _Pezizomycotina; _Eurotiomycetes; _Eurotiomycetidae; _Eurotiales; _Trichocomaceae; _Penicillium|-|-')	0	0	1	1	0	0	0	0	1	1	16	4	1	3	0	0	0	0	1	0	0	0	0	0	1	0	0	0	0	1	0	1	1	1	0	0	0	2	0	0	0	1	0	0	0	0	0	0	0
('1377', '_', 'EU449953|Sympodiella_acicola|Fungi; _Ascomycota; _Pezizomycotina; _Incertae_sedis; _Incertae_sedis; _Incertae_sedis; _Incertae_sedis; _Sympodiella|-|-')	0	0	0	0	0	0	0	0	0	0	0	0	0	1	0	0	0	0	0	1	0	0	1	2	0	0	0	0	1	0	0	0	0	0	0	0	0	0	0	0	0	0	1	0	0	1	0	0	0
('1379', '_', 'AF440546|Fusarium_oxysporum|Fungi; _Ascomycota; _Pezizomycotina; _Sordariomycetes; _Hypocreomycetidae; _Hypocreales; _Nectriaceae; _Fusarium; _Fusarium_oxysporum|-|-')	0	0	9	3	0	0	0	0	0	0	0	0	0	0	0	0	0	0	0	0	0	0	0	0	0	0	0	0	0	0	0	0	0	1	0	0	0	0	0	0	0	1	0	0	0	0	0	0	0
('1380', '_', 'HQ630350|Mortierella_turficola|Fungi; _Zygomycota; _Mucoromycotina; _Incertae_sedis; _Incertae_sedis; _Mortierellales; _Mortierellaceae; _Mortierella|-|-')	0	0	0	0	0	0	0	0	0	0	0	0	0	0	0	0	0	0	0	0	0	0	0	8	0	0	0	0	0	0	0	0	0	0	0	0	0	0	0	0	0	0	0	0	0	0	0	0	0
('1382', '_', 'AY729938|Lunulospora_curvula|Fungi; _Ascomycota; _Pezizomycotina; _Incertae_sedis; _Incertae_sedis; _Incertae_sedis; _Incertae_sedis; _Lunulospora|-|-')	0	0	0	4	0	0	0	0	0	0	0	0	0	0	0	0	0	0	0	1	0	0	0	0	0	0	0	0	4	0	1	0	0	0	0	0	0	0	0	0	0	1	1	0	0	0	1	0	0
('1385', '_', 'EU871034|Trichoderma_spirale|Fungi; _Ascomycota; _Pezizomycotina; _Sordariomycetes; _Hypocreomycetidae; _Hypocreales; _Hypocreaceae; _Trichoderma|-|-')	0	0	0	1	0	0	0	0	0	0	3	0	0	0	0	0	0	4	0	0	0	0	1	1	2	0	1	0	3	0	0	0	1	0	0	0	0	1	0	0	0	0	0	0	0	1	0	0	0
('14', '_', 'HM189961|Thelephora_terrestris|Fungi; _Basidiomycota; _Agaricomycotina; _Agaricomycetes; _Incertae_sedis; _Thelephorales; _Thelephoraceae; _Thelephora; _Thelephora_terrestris|-|-')	0	0	0	0	0	0	0	0	0	0	0	0	0	0	0	0	0	0	0	0	0	0	0	0	0	0	0	0	0	0	0	0	0	0	70	0	0	0	0	0	0	1	0	0	0	0	0	0	0
('1403', '_', 'HQ441573|Aleurodiscus_aurantius|Fungi; _Basidiomycota; _Agaricomycotina; _Agaricomycetes; _Incertae_sedis; _Russulales; _Stereaceae; _Aleurodiscus; _Aleurodiscus_aurantius|-|-')	0	0	0	0	0	0	0	0	0	0	0	0	0	0	0	0	1	0	0	0	0	0	0	0	0	0	0	0	0	0	0	0	0	0	0	0	0	0	0	0	0	0	0	0	0	0	0	0	0
('1409', '_', 'AF358226|Bionectria_aureofulvella|Fungi; _Ascomycota; _Pezizomycotina; _Sordariomycetes; _Hypocreomycetidae; _Hypocreales; _Bionectriaceae; _Bionectria|-|-')	0	0	0	0	0	0	0	0	0	0	0	1	0	0	0	0	0	0	0	0	0	0	0	0	0	0	0	0	0	0	0	1	0	0	0	0	0	0	0	0	0	0	0	0	0	0	0	0	0
('1410', '_', 'AJ890439|Acremonium_sp_CBS_118526|Fungi; _Ascomycota; _Pezizomycotina; _Sordariomycetes; _Hypocreomycetidae; _Hypocreales; _Incertae_sedis; _Acremonium|-|-')	0	0	0	0	0	0	0	0	0	0	0	0	0	0	0	0	0	1	0	0	0	0	0	0	0	0	0	0	0	0	0	0	1	0	0	0	0	0	0	0	0	0	0	0	0	0	0	0	0
('1419', '_', 'FJ770395|Clitopilus_hobsonii|Fungi; _Basidiomycota; _Agaricomycotina; _Agaricomycetes; _Agaricomycetidae; _Agaricales; _Entolomataceae; _Clitopilus; _Clitopilus_hobsonii|-|-')	0	0	0	0	0	0	0	0	0	0	0	0	0	0	0	0	0	0	0	0	0	0	0	0	0	0	0	0	0	0	0	0	0	0	0	0	0	0	0	0	0	0	0	0	0	0	0	0	0
('1420', '_', 'DQ822798|Clavulina_sp_KGP89|Fungi; _Basidiomycota; _Agaricomycotina; _Agaricomycetes; _Incertae_sedis; _Cantharellales; _Clavulinaceae; _Clavulina|Clavulina|Fungi; _Basidiomycota; _Agaricomycotina; _Agaricomycetes; _Incertae_sedis; _Cantharellales; _Clavulinaceae; _Clavulina')	0	0	0	0	0	0	0	0	0	0	0	0	0	0	0	0	0	0	0	0	0	0	1	0	0	0	0	0	0	0	0	0	0	0	0	0	0	0	0	0	0	0	1	0	0	0	0	0	0
('1421', '_', 'AF269068|ericoid_mycorrhizal_sp_Sd2|Fungi; _Ascomycota; _Pezizomycotina; _Leotiomycetes; _Leotiomycetidae; _Helotiales|-|-')	0	0	0	0	0	0	0	0	0	0	0	0	0	0	0	0	0	0	0	0	1	0	0	0	0	0	0	0	0	0	0	0	0	0	0	1	0	0	0	0	0	0	0	0	0	0	0	0	0
('1423', '_', 'JF705952|Hormonema_sp_PIMO_38|Fungi; _Ascomycota; _Pezizomycotina; _Dothideomycetes; _Dothideomycetidae; _Dothideales; _Dothioraceae; _Hormonema|-|-')	0	0	0	0	0	0	0	0	0	0	0	0	0	0	0	0	0	0	0	0	0	1	0	0	0	0	0	0	0	0	0	0	0	0	0	0	0	0	0	0	0	0	0	0	0	0	0	0	0
('1424', '_', 'UDB011689|-|-|Entoloma_papillatum|Fungi; _Basidiomycota; _Agaricomycotina; _Agaricomycetes; _Agaricomycetidae; _Agaricales; _Entolomataceae; _Entoloma; _Entoloma_papillatum')	0	0	0	0	0	0	0	0	0	0	0	0	0	0	0	0	0	0	0	0	0	0	0	0	0	0	0	0	0	0	0	0	0	0	0	0	0	0	0	0	0	0	0	0	0	0	0	0	0
('143', '_', 'AY376410|Umbelopsis_sp_CROW3_E11_2_3|Fungi; _Zygomycota; _Mucoromycotina; _Incertae_sedis; _Incertae_sedis; _Mucorales; _Umbelopsidaceae; _Umbelopsis|-|-')	0	0	0	1	0	0	0	0	0	0	0	0	0	0	0	0	0	0	0	0	0	0	0	0	0	0	0	4	0	0	1	0	0	2	0	0	0	0	0	0	1	0	0	0	0	0	0	0	0
('144', '_', 'EU680536|dothideomycete_sp_7667|Fungi; _Ascomycota; _Pezizomycotina; _Dothideomycetes|-|-')	0	0	0	1	0	0	0	0	0	0	0	0	0	0	0	0	0	0	0	0	0	0	0	0	0	0	0	0	0	0	0	0	0	0	0	0	0	0	0	0	1	0	0	0	0	0	0	1	1
('1446', '_', 'GQ169323|Sagenomella_humicola|Fungi; _Ascomycota; _Pezizomycotina; _Eurotiomycetes; _Eurotiomycetidae; _Eurotiales; _Trichocomaceae; _Sagenomella|-|-')	0	0	0	0	0	0	0	0	0	0	0	0	0	0	0	0	0	0	0	0	0	0	0	0	0	0	0	0	0	0	0	0	0	0	0	0	0	1	0	0	0	0	0	0	0	0	0	0	0
('1470', '_', 'AM292666|Bacidina_ramea|Fungi; _Ascomycota; _Pezizomycotina; _Lecanoromycetes; _Lecanoromycetidae; _Lecanorales; _Ramalinaceae; _Bacidina|-|-')	0	0	0	0	0	0	0	0	0	0	0	0	0	0	0	0	4	0	0	0	0	0	0	0	0	0	0	0	0	0	0	0	0	0	0	0	0	0	0	0	0	0	0	0	0	0	0	0	0
('1476', '_', 'DQ914728|Helotiales_sp_EXP0411F|Fungi; _Ascomycota; _Pezizomycotina; _Leotiomycetes; _Leotiomycetidae; _Helotiales|-|-')	0	0	0	0	0	0	0	0	0	0	0	0	0	0	1	0	0	0	0	0	0	0	0	0	0	1	0	0	0	0	0	0	0	0	0	0	0	0	1	0	0	0	0	0	0	0	0	0	0
('1486', '_', 'AB233343|Glomerella_graminicola|Fungi; _Ascomycota; _Pezizomycotina; _Sordariomycetes; _Sordariomycetidae; _Incertae_sedis; _Glomerellaceae; _Glomerella; _Glomerella_graminicola|-|-')	0	0	0	0	0	0	0	0	0	0	0	0	0	0	0	0	0	0	0	0	1	0	0	0	0	0	0	0	0	0	0	0	0	0	0	0	0	0	0	0	0	0	1	0	0	0	0	0	0
('149', '_', 'AF323109|Thelephoroid_sp_nw2|Fungi; _Basidiomycota; _Agaricomycotina; _Agaricomycetes; _Incertae_sedis; _Thelephorales; _Thelephoraceae|-|-')	0	0	0	0	0	0	0	0	0	0	0	0	0	0	0	0	0	0	0	0	0	0	0	0	0	0	0	0	0	0	0	0	0	0	2	0	0	0	0	0	0	0	8	0	0	0	0	0	0
('1490', '_', 'AY230246|ascomycete_sp_DGC_6(5)|Fungi; _Ascomycota|-|-')	0	0	0	0	0	0	1	0	0	0	0	0	0	0	0	0	0	0	0	0	0	0	0	0	0	0	0	0	0	0	0	0	0	0	0	0	0	0	0	0	0	0	0	0	0	0	0	0	0
('1493', '_', 'HQ022487|Beauveria_sp_LA196|Fungi; _Ascomycota; _Pezizomycotina; _Sordariomycetes; _Hypocreomycetidae; _Hypocreales; _Clavicipitaceae; _Beauveria|-|-')	0	0	0	0	0	0	0	0	0	0	0	0	0	0	0	0	0	0	0	0	0	0	0	0	1	1	0	0	0	0	0	0	0	0	0	0	0	0	0	0	0	0	0	0	0	0	0	0	0
('15', '_', 'FJ861405|Mortierella_sp_1S22A|Fungi; _Zygomycota; _Mucoromycotina; _Incertae_sedis; _Incertae_sedis; _Mortierellales; _Mortierellaceae; _Mortierella|-|-')	5	2	3	6	2	2	0	0	0	0	0	4	0	0	0	0	0	3	0	3	0	0	13	1	6	4	3	13	7	7	0	0	0	0	0	0	0	6	1	1	9	3	0	0	0	0	1	1	0
('1504', '_', 'JF747106|Exophiala_sp_KL_2011f|Fungi; _Ascomycota; _Pezizomycotina; _Eurotiomycetes; _Chaetothyriomycetidae; _Chaetothyriales; _Herpotrichiellaceae; _Exophiala|-|-')	0	0	0	0	0	0	0	0	0	0	0	0	0	0	0	0	0	0	1	0	0	0	0	0	0	0	0	0	0	0	0	0	0	0	0	0	0	0	0	0	0	0	0	0	0	0	0	0	0
('151', '_', 'AY587919|Lasiosphaeria_lanuginosa|Fungi; _Ascomycota; _Pezizomycotina; _Sordariomycetes; _Sordariomycetidae; _Sordariales; _Lasiosphaeriaceae; _Lasiosphaeria|-|-')	0	0	0	2	0	0	0	0	0	0	0	0	0	0	0	0	0	0	0	0	0	0	0	0	0	0	0	14	0	0	0	0	0	0	0	0	0	0	0	0	0	0	0	0	0	0	0	0	0
('1515', '_', 'DQ458900|Diplodia_scrobiculata|Fungi; _Ascomycota; _Pezizomycotina; _Dothideomycetes; _Incertae_sedis; _Botryosphaeriales; _Botryosphaeriaceae; _Diplodia|-|-')	0	0	0	0	0	0	0	0	0	0	0	0	0	0	0	0	0	0	0	0	0	0	0	0	0	0	0	0	0	0	0	0	0	0	0	0	0	0	0	1	0	0	0	0	0	0	0	0	0
('1517', '_', 'AY908995|Dicyma_pulvinata||-|-')	0	0	0	0	0	0	0	0	0	0	0	0	0	0	0	0	0	0	0	0	0	0	0	0	0	0	0	0	0	0	0	1	0	0	0	0	0	0	0	0	0	0	0	0	0	0	0	0	0
('1521', '_', 'AB180355|Exobasidium_woronichinii|Fungi; _Basidiomycota; _Ustilaginomycotina; _Exobasidiomycetes; _Incertae_sedis; _Exobasidiales; _Exobasidiaceae; _Exobasidium|-|-')	0	0	0	0	0	0	0	0	0	0	0	0	0	0	0	2	0	0	1	0	0	0	0	0	0	0	0	0	0	0	0	0	0	0	0	0	0	0	0	0	0	0	0	0	0	0	0	0	0
('1530', '_', 'JF412007|Scytalidium_thermophilum|Fungi; _Ascomycota; _Pezizomycotina; _Leotiomycetes; _Leotiomycetidae; _Helotiales; _Incertae_sedis; _Scytalidium|-|-')	0	0	1	0	0	1	0	0	0	0	0	0	0	0	0	0	0	0	0	0	0	0	0	0	0	0	0	0	0	0	0	0	0	0	0	0	0	0	0	0	0	0	0	0	0	0	0	0	0
('1539', '_', 'JF327417|Cadophora_sp_Cad16_lug_ERSA_A16_2|Fungi; _Ascomycota; _Pezizomycotina; _Leotiomycetes; _Leotiomycetidae; _Helotiales; _Incertae_sedis; _Cadophora|-|-')	0	0	0	0	0	0	0	0	0	0	0	0	0	0	0	0	0	0	0	0	0	0	0	0	0	0	0	0	0	0	0	0	1	0	0	0	0	0	0	0	0	0	0	0	0	0	1	0	0
('1540', '_', 'EU002883|Erythrobasidium_hasegawianum|Fungi; _Basidiomycota; _Pucciniomycotina; _Cystobasidiomycetes; _Incertae_sedis; _Erythrobasidiales; _Incertae_sedis; _Erythrobasidium|-|-')	0	1	0	0	0	0	0	0	0	0	0	0	0	0	0	1	0	0	0	0	0	0	0	0	0	0	0	0	0	0	0	0	0	1	0	1	0	1	0	0	0	0	0	0	0	0	0	1	0
('1541', '_', 'AY805548|Capnodium_sp_olrim506|Fungi; _Ascomycota; _Pezizomycotina; _Dothideomycetes; _Dothideomycetidae; _Capnodiales; _Capnodiaceae; _Capnodium|-|-')	0	0	0	0	0	1	0	0	0	0	0	0	0	0	0	0	0	0	0	0	0	0	0	0	0	0	0	0	0	0	0	0	0	0	0	0	0	0	0	0	0	0	0	0	0	0	0	1	0
('1543', '_', 'DQ317635|Tilletiopsis_pallescens|Fungi; _Basidiomycota; _Ustilaginomycotina; _Exobasidiomycetes; _Exobasidiomycetidae; _Incertae_sedis; _Incertae_sedis; _Tilletiopsis|-|-')	0	0	0	0	0	0	0	0	0	0	0	0	0	0	0	0	0	0	0	0	0	0	0	0	0	0	0	0	0	0	0	0	0	1	0	0	0	0	0	0	0	0	0	0	0	0	0	0	0
('1549', '_', 'GQ121045|Rhodotorula_sp_CBS11420|Fungi; _Basidiomycota; _Pucciniomycotina; _Microbotryomycetes; _Incertae_sedis; _Sporidiobolales; _Incertae_sedis; _Rhodotorula|-|-')	0	0	0	0	0	0	0	0	0	0	0	0	0	0	0	0	0	0	0	0	0	0	0	0	0	0	0	0	0	0	0	0	0	0	0	0	0	0	0	0	0	0	0	0	1	0	0	0	0
('155', '_', 'EU488736|Menispora_ciliata|Fungi; _Ascomycota; _Pezizomycotina; _Sordariomycetes; _Sordariomycetidae; _Chaetosphaeriales; _Chaetosphaeriaceae; _Menispora|-|-')	1	0	0	0	0	0	0	0	0	0	0	0	1	0	0	0	1	3	0	0	0	0	0	0	0	0	0	0	0	0	0	0	9	0	1	0	0	0	0	1	0	0	0	0	0	0	0	0	0
('1551', '_', 'FN400945|Rhodotorula_sp_KBP_3844|Fungi; _Basidiomycota; _Pucciniomycotina; _Microbotryomycetes; _Incertae_sedis; _Sporidiobolales; _Incertae_sedis; _Rhodotorula|-|-')	0	0	0	0	0	0	0	0	0	0	0	0	0	0	0	0	0	0	0	0	0	1	1	0	0	0	0	0	0	0	0	0	0	0	0	0	0	0	0	0	0	0	0	0	0	0	0	0	0
('1555', '_', 'FJ411409|Tolypocladium_cylindrosporum|Fungi; _Ascomycota; _Pezizomycotina; _Sordariomycetes; _Hypocreomycetidae; _Hypocreales; _Ophiocordycipitaceae; _Tolypocladium|-|-')	0	0	0	0	1	0	0	0	0	0	0	0	0	0	0	0	0	0	0	0	0	0	0	0	0	2	0	0	0	0	0	0	0	0	1	0	0	0	0	0	0	0	1	0	0	0	0	0	0
('1559', '_', 'AF282097|Bacidina_delicata|Fungi; _Ascomycota; _Pezizomycotina; _Lecanoromycetes; _Lecanoromycetidae; _Lecanorales; _Ramalinaceae; _Bacidina|-|-')	0	0	0	0	0	0	0	0	0	0	0	0	0	0	0	0	0	0	0	0	0	0	0	1	0	4	0	0	0	0	0	0	0	0	0	0	0	0	0	0	0	0	0	0	0	0	0	0	0
('156', '_', 'HQ630362|Mortierella_elongata|Fungi; _Zygomycota; _Mucoromycotina; _Incertae_sedis; _Incertae_sedis; _Mortierellales; _Mortierellaceae; _Mortierella; _Mortierella_elongata|-|-')	0	0	0	0	0	0	0	0	0	0	0	0	0	0	0	0	0	0	0	0	0	0	0	0	0	0	0	0	0	0	1	1	0	0	0	0	0	0	0	0	0	0	0	0	0	0	2	1	0
('157', '_', 'AM921729|Pleosporales_sp_IZ_979|Fungi; _Ascomycota; _Pezizomycotina; _Dothideomycetes; _Pleosporomycetidae; _Pleosporales|-|-')	0	0	0	0	6	0	0	0	0	0	0	1	0	0	0	0	0	0	0	1	0	0	0	0	0	0	0	0	0	0	0	0	0	0	0	0	0	0	0	0	0	0	0	0	0	0	0	1	0
('159', '_', 'U21820|Poculum_henningsianum|Fungi; _Ascomycota; _Pezizomycotina; _Leotiomycetes; _Leotiomycetidae; _Helotiales; _Rutstroemiaceae; _Poculum|-|-')	0	0	0	0	0	11	0	0	0	0	0	0	0	0	0	0	0	0	0	0	0	0	0	0	0	0	0	0	0	0	0	0	0	0	0	0	0	0	0	0	0	0	0	0	0	0	1	1	0
('16', '_', 'HQ604326|Inocybe_griseolilacina|Fungi; _Basidiomycota; _Agaricomycotina; _Agaricomycetes; _Agaricomycetidae; _Agaricales; _Cortinariaceae; _Inocybe; _Inocybe_griseolilacina|-|-')	0	0	0	0	0	0	0	152	0	0	0	0	0	0	0	0	0	0	0	0	0	0	0	0	0	0	0	0	0	0	0	0	0	0	0	0	0	0	0	0	0	0	0	0	0	0	0	0	0
('161', '_', 'HQ631053|Stilbella_sp_1_TMS_2011|Fungi; _Ascomycota; _Pezizomycotina; _Sordariomycetes; _Hypocreomycetidae; _Hypocreales; _Incertae_sedis; _Stilbella|-|-')	0	0	0	0	0	0	0	0	0	1	3	2	0	0	0	1	0	1	2	1	0	1	0	0	0	0	0	0	0	1	0	0	0	0	0	0	0	0	0	1	0	2	0	0	0	0	0	0	0
('174', '_', 'UDB002161|-|-|Cortinarius_diasemospermus|Fungi; _Basidiomycota; _Agaricomycotina; _Agaricomycetes; _Agaricomycetidae; _Agaricales; _Cortinariaceae; _Cortinarius; _Cortinarius_diasemospermus')	0	0	0	0	0	0	0	0	0	0	0	0	0	0	0	0	0	0	0	0	0	0	0	0	0	0	0	0	0	0	0	0	0	0	0	0	52	0	0	0	0	0	0	0	0	0	0	0	0
('175', '_', 'DQ402530|Chaunopycnis_sp_ANT_03_065|Fungi; _Ascomycota; _Pezizomycotina; _Sordariomycetes; _Hypocreomycetidae; _Hypocreales; _Ophiocordycipitaceae; _Chaunopycnis|-|-')	0	0	0	0	0	0	0	0	0	0	0	0	0	0	0	0	0	0	0	0	0	0	0	1	0	4	1	0	0	0	0	0	1	0	0	0	0	0	2	1	1	0	1	0	0	0	0	0	0
('176', '_', 'DQ345566|Hirsutella_rhossiliensis|Fungi; _Ascomycota; _Pezizomycotina; _Sordariomycetes; _Hypocreomycetidae; _Hypocreales; _Ophiocordycipitaceae; _Hirsutella|-|-')	0	0	0	0	0	1	0	0	0	0	0	0	0	0	0	0	0	0	0	0	4	0	0	0	0	0	0	0	0	0	0	0	0	0	0	0	4	0	0	0	0	0	0	0	0	0	1	0	0
('180', '_', 'AY035666|Entrophospora_sp_JJ61|Fungi; _Glomeromycota; _Incertae_sedis; _Glomeromycetes; _Incertae_sedis; _Diversisporales; _Entrophosporaceae; _Entrophospora|-|-')	0	0	0	0	0	0	0	0	0	0	0	0	0	0	0	0	0	0	0	0	1	0	0	0	0	0	0	0	0	0	0	0	0	0	0	0	0	0	0	0	0	0	0	0	0	0	0	0	0
('181', '_', 'DQ914739|Verticillium_sp_EXP0564F|Fungi; _Ascomycota; _Pezizomycotina; _Sordariomycetes; _Hypocreomycetidae; _Incertae_sedis; _Plectosphaerellaceae; _Verticillium|-|-')	2	0	0	0	0	0	0	0	0	0	0	0	0	0	0	0	0	0	1	0	0	0	0	0	0	0	0	0	0	0	0	1	0	1	0	0	0	0	0	0	0	0	0	0	0	0	0	1	0
('188', '_', 'UDB000253|-|-|Tomentella_bryophila|Fungi; _Basidiomycota; _Agaricomycotina; _Agaricomycetes; _Incertae_sedis; _Thelephorales; _Thelephoraceae; _Tomentella; _Tomentella_bryophila')	0	0	0	0	0	0	0	0	0	0	0	0	0	0	0	0	0	36	0	0	0	0	0	0	0	0	0	0	0	0	0	0	0	0	0	0	0	0	0	0	0	0	0	0	0	0	0	0	2
('189', '_', 'AY010274|Tomentella_cf_coerulea_EL226|Fungi; _Basidiomycota; _Agaricomycotina; _Agaricomycetes; _Incertae_sedis; _Thelephorales; _Thelephoraceae; _Tomentella|-|-')	0	0	0	0	0	0	10	0	0	0	0	0	0	0	0	0	0	0	0	0	0	0	0	0	0	0	0	0	0	0	0	0	0	0	0	0	0	0	0	0	0	0	0	0	0	0	0	0	0
('19', '_', 'AY751561|Thelephoraceae_sp_EC200_B381|Fungi; _Basidiomycota; _Agaricomycotina; _Agaricomycetes; _Incertae_sedis; _Thelephorales; _Thelephoraceae|-|-')	0	0	0	0	0	0	0	0	0	0	0	0	0	0	0	0	0	0	0	0	0	0	0	0	0	0	0	0	0	0	0	0	0	0	0	0	106	0	0	0	0	0	0	0	0	0	0	0	0
('190', '_', 'AF444351|Cryptococcus_phenolicus|Fungi; _Basidiomycota; _Agaricomycotina; _Tremellomycetes; _Incertae_sedis; _Filobasidiales; _Filobasidiaceae; _Cryptococcus|-|-')	0	0	0	0	0	3	0	0	0	0	0	0	0	0	0	0	0	0	0	0	0	0	0	0	0	0	0	0	0	0	0	0	0	1	0	0	0	0	0	0	0	0	1	1	0	0	0	0	0
('193', '_', 'FM172752|Calluna_vulgaris_root_associated_fungus|Fungi|-|-')	0	0	0	0	0	0	0	0	2	0	3	0	0	1	0	1	2	0	3	0	0	0	0	0	2	0	0	0	0	0	0	0	0	0	0	0	0	1	0	0	0	0	0	0	0	0	0	0	0
('196', '_', 'EU770246|Lophiostoma_corticola|Fungi; _Ascomycota; _Pezizomycotina; _Dothideomycetes; _Pleosporomycetidae; _Pleosporales; _Lophiostomataceae; _Lophiostoma|-|-')	0	0	0	0	2	0	0	0	0	0	0	0	0	0	0	0	0	0	1	0	0	0	0	0	0	0	0	0	0	0	0	1	0	0	0	1	0	0	0	1	1	0	0	0	0	0	0	0	0
('197', '_', 'FM207639|Ascomycota_sp_Cq_Gry_H7|Fungi; _Ascomycota|-|-')	1	0	0	1	0	0	0	0	0	0	0	0	0	0	0	0	0	0	0	0	0	0	1	0	0	0	0	2	0	0	2	0	1	1	0	0	0	0	0	0	1	0	1	1	0	0	0	0	0
('198', '_', 'AY240841|Hypocrea_pachybasioides|Fungi; _Ascomycota; _Pezizomycotina; _Sordariomycetes; _Hypocreomycetidae; _Hypocreales; _Hypocreaceae; _Hypocrea|-|-')	0	0	0	0	0	0	0	0	0	0	0	0	0	0	0	0	0	0	0	1	0	0	0	0	0	0	0	0	0	0	0	0	0	0	0	0	0	0	0	0	0	0	0	0	0	0	0	0	0
('20', '_', 'JF311959|Paecilomyces_carneus|Fungi; _Ascomycota; _Pezizomycotina; _Eurotiomycetes; _Eurotiomycetidae; _Eurotiales; _Trichocomaceae; _Paecilomyces|-|-')	0	0	2	6	1	1	0	0	0	6	0	15	1	0	0	0	0	2	1	0	0	1	1	1	0	0	1	11	15	1	2	0	0	1	0	1	1	2	0	0	0	3	2	0	0	0	0	0	0
('204', '_', 'FJ665274|Exophiala_sp_WW_2009a|Fungi; _Ascomycota; _Pezizomycotina; _Eurotiomycetes; _Chaetothyriomycetidae; _Chaetothyriales; _Herpotrichiellaceae; _Exophiala|-|-')	0	0	0	0	0	1	0	0	0	0	0	0	0	0	0	0	0	0	0	0	1	0	0	0	0	0	0	0	0	0	0	0	0	0	2	0	0	0	0	0	0	0	2	1	0	0	0	0	3
('205', '_', 'FM180478|Helotiales_sp_IMI_392569|Fungi; _Ascomycota; _Pezizomycotina; _Leotiomycetes; _Leotiomycetidae; _Helotiales|-|-')	0	0	0	0	0	0	0	0	0	0	0	0	0	0	0	0	0	0	0	0	0	0	3	1	2	1	0	0	0	0	0	0	0	0	0	0	0	0	0	0	0	0	0	0	0	1	0	0	0
('206', '_', 'AY587919|Lasiosphaeria_lanuginosa|Fungi; _Ascomycota; _Pezizomycotina; _Sordariomycetes; _Sordariomycetidae; _Sordariales; _Lasiosphaeriaceae; _Lasiosphaeria|-|-')	0	0	0	0	0	0	0	0	0	0	0	0	0	0	0	0	0	0	0	0	0	0	0	0	0	0	0	0	0	0	0	0	0	0	0	0	0	0	0	0	0	0	0	0	1	0	0	0	0
('213', '_', 'AF429422|Hypochnicium_albostramineum|Fungi; _Basidiomycota; _Agaricomycotina; _Agaricomycetes; _Incertae_sedis; _Polyporales; _Hyphodermataceae; _Hypochnicium; _Hypochnicium_albostramineum|-|-')	0	0	0	0	0	0	0	0	0	0	0	0	0	0	0	0	0	0	0	0	0	0	0	0	0	0	0	0	0	0	0	0	0	0	0	0	0	0	0	0	0	0	0	0	0	0	0	0	0
('214', '_', 'HQ630346|Mortierella_amoeboidea|Fungi; _Zygomycota; _Mucoromycotina; _Incertae_sedis; _Incertae_sedis; _Mortierellales; _Mortierellaceae; _Mortierella|-|-')	0	1	0	1	1	0	0	0	2	2	8	3	0	0	0	0	1	1	0	0	0	0	1	0	0	0	0	3	0	6	0	0	0	0	1	1	0	0	0	1	1	0	1	0	0	0	0	0	0
('223', '_', 'FR846484|Helotiales_sp_NK273|Fungi; _Ascomycota; _Pezizomycotina; _Leotiomycetes; _Leotiomycetidae; _Helotiales|-|-')	9	0	0	0	0	0	3	1	0	0	1	0	1	3	0	1	0	0	3	0	0	4	0	0	0	0	2	0	0	0	0	0	0	1	0	0	0	0	0	1	0	0	0	1	0	2	0	0	0
('226', '_', 'AF502859|leaf_litter_ascomycete_strain_its356|Fungi; _Ascomycota|-|-')	0	0	1	2	1	0	0	0	0	0	0	0	0	0	0	0	0	0	0	0	0	0	0	0	0	0	0	0	0	0	0	0	0	0	0	0	0	0	0	0	0	0	0	0	0	0	0	0	0
('227', '_', 'GU184101|Geopora_cooperi|Fungi; _Ascomycota; _Pezizomycotina; _Pezizomycetes; _Pezizomycetidae; _Pezizales; _Pyronemataceae; _Geopora; _Geopora_cooperi|-|-')	0	11	0	0	0	0	0	0	0	0	0	0	0	0	0	0	0	0	0	0	0	0	0	0	0	0	0	0	0	0	0	0	0	0	0	0	0	0	0	0	0	0	0	0	0	0	0	0	0
('228', '_', 'AJ534910|Sebacinaceae_sp_W53|Fungi; _Basidiomycota; _Agaricomycotina; _Agaricomycetes; _Incertae_sedis; _Sebacinales; _Sebacinaceae|-|-')	0	0	0	0	0	0	0	0	0	0	0	0	0	0	0	0	0	5	0	0	0	0	0	0	0	0	0	0	0	0	0	0	0	0	0	0	0	10	0	0	0	0	0	0	0	0	0	0	0
('232', '_', 'GU934536|Leptosphaeria_sp_OTU860|Fungi; _Ascomycota; _Pezizomycotina; _Dothideomycetes; _Pleosporomycetidae; _Pleosporales; _Leptosphaeriaceae; _Leptosphaeria|-|-')	0	0	0	0	1	0	0	0	0	0	0	0	0	1	0	0	0	0	0	1	4	0	0	0	0	0	0	0	2	0	0	0	0	0	0	0	0	0	0	0	0	0	0	0	0	0	0	0	0
('235', '_', 'JF273550|Xylariales_sp_EMF50|Fungi; _Ascomycota; _Pezizomycotina; _Sordariomycetes; _Xylariomycetidae; _Xylariales|-|-')	0	0	8	1	0	0	0	0	0	0	0	0	0	0	0	0	0	0	0	0	0	0	0	0	0	0	0	0	0	0	0	0	0	0	0	0	0	0	0	0	0	0	0	0	0	0	0	0	0
('239', '_', 'FM172790|Calluna_vulgaris_root_associated_fungus|Fungi|-|-')	0	0	0	1	0	0	0	0	0	0	0	0	0	1	0	0	0	0	0	0	0	0	0	0	0	0	0	0	1	0	0	0	0	0	0	0	0	0	1	0	0	0	0	0	0	0	0	0	0
('242', '_', 'UDB001616|-|-|Pseudotomentella_atrofusca|Fungi; _Basidiomycota; _Agaricomycotina; _Agaricomycetes; _Incertae_sedis; _Thelephorales; _Thelephoraceae; _Pseudotomentella; _Pseudotomentella_atrofusca')	0	0	0	0	0	0	0	0	4	2	0	0	0	0	0	0	0	0	11	0	0	3	0	0	0	0	0	0	0	0	0	2	0	0	0	0	2	0	0	0	0	0	0	0	0	0	0	0	0
('244', '_', 'HQ604557|Inocybe_cf_striata_UBC_F19394|Fungi; _Basidiomycota; _Agaricomycotina; _Agaricomycetes; _Agaricomycetidae; _Agaricales; _Cortinariaceae; _Inocybe|-|-')	0	0	0	0	0	0	0	0	0	0	0	0	0	0	0	0	0	0	0	0	0	16	0	0	0	0	0	0	0	0	0	0	0	0	0	0	0	0	0	0	0	0	0	16	0	0	0	0	0
('245', '_', 'AM262391|Acremonium_sp_SS_1449|Fungi; _Ascomycota; _Pezizomycotina; _Sordariomycetes; _Hypocreomycetidae; _Hypocreales; _Incertae_sedis; _Acremonium|-|-')	0	0	0	0	0	0	1	0	0	0	0	0	0	0	0	0	0	0	0	0	0	0	0	0	0	0	0	0	0	0	0	1	0	0	0	0	0	0	0	0	0	0	0	0	0	0	0	0	0
('246', '_', 'AF481124|Penicillium_fagi|Fungi; _Ascomycota; _Pezizomycotina; _Eurotiomycetes; _Eurotiomycetidae; _Eurotiales; _Trichocomaceae; _Penicillium|-|-')	0	0	0	0	0	1	0	0	0	0	0	0	0	0	0	0	0	0	0	0	0	0	0	0	0	0	0	0	0	0	0	0	1	1	2	0	0	0	0	0	0	0	0	0	0	0	0	0	0
('247', '_', 'UC1859544|Russula_amoenolens|voucher|-|-')	0	0	0	0	0	0	0	0	0	0	0	0	0	0	0	0	0	0	0	17	0	0	0	0	0	0	0	0	0	0	0	0	0	0	0	53	0	1	0	0	15	0	0	10	0	0	0	2	0
('248', '_', 'HQ604480|Inocybe_glabrodisca|Fungi; _Basidiomycota; _Agaricomycotina; _Agaricomycetes; _Agaricomycetidae; _Agaricales; _Cortinariaceae; _Inocybe; _Inocybe_glabrodisca|-|-')	0	0	0	0	0	0	0	49	0	0	0	0	0	0	0	0	0	0	0	0	0	0	0	0	0	0	0	0	0	0	0	0	0	0	0	0	0	0	0	0	0	0	0	0	0	0	0	0	0
('26', '_', 'YNP307|Tricharina_sp.|voucher|-|-')	0	8	0	0	0	1	0	0	0	42	0	0	0	0	0	0	0	0	0	0	0	0	13	0	0	0	0	0	0	0	0	14	0	0	0	0	0	0	0	0	1	0	0	0	0	0	0	0	0
('263', '_', 'HQ213811|Scytalidium_thermophilum|Fungi; _Ascomycota; _Pezizomycotina; _Leotiomycetes; _Leotiomycetidae; _Helotiales; _Incertae_sedis; _Scytalidium|-|-')	0	0	2	0	0	2	0	0	0	0	0	0	0	0	0	0	0	0	0	0	0	0	3	0	0	0	0	0	0	0	1	0	0	0	0	0	0	0	0	0	0	6	0	0	0	0	4	0	0
('267', '_', 'FN812725|Ceratobasidium_sp_0109CI64L1|Fungi; _Basidiomycota; _Agaricomycotina; _Agaricomycetes; _Incertae_sedis; _Cantharellales; _Ceratobasidiaceae; _Ceratobasidium|-|-')	0	0	0	0	0	0	0	0	0	0	0	0	0	0	0	0	0	0	0	0	6	0	0	0	0	0	0	0	0	0	0	0	0	0	0	0	0	0	0	0	0	0	0	0	0	0	0	0	0
('269', '_', 'EU314707|Phialophora_sp_DF33|Fungi; _Ascomycota; _Pezizomycotina; _Eurotiomycetes; _Chaetothyriomycetidae; _Chaetothyriales; _Herpotrichiellaceae; _Phialophora|-|-')	0	0	0	0	0	0	0	0	0	0	0	0	0	1	0	0	1	1	0	0	1	0	0	0	0	0	0	0	0	0	0	0	0	0	0	0	0	0	0	0	0	0	0	0	0	0	0	0	0
('27', '_', 'GQ354256|Beauveria_sp_JS_2009a|Fungi; _Ascomycota; _Pezizomycotina; _Sordariomycetes; _Hypocreomycetidae; _Hypocreales; _Clavicipitaceae; _Beauveria|-|-')	0	0	0	0	0	0	0	0	1	0	0	0	1	0	0	0	62	0	0	0	0	0	0	0	6	0	0	0	0	0	0	0	1	1	0	0	0	0	0	1	0	0	0	0	0	1	0	6	0
('270', '_', 'DQ485683|Rhizophydium_sp_PL_152|Fungi; _Chytridiomycota; _Incertae_sedis; _Chytridiomycetes; _Incertae_sedis; _Rhizophydiales; _Rhizophydiaceae; _Rhizophydium|-|-')	0	0	0	0	0	0	0	0	0	0	0	0	0	0	0	0	0	0	0	0	0	0	0	5	0	0	0	0	0	0	0	0	0	0	0	0	0	0	0	0	0	0	0	0	0	0	0	0	0
('271', '_', 'AJ557747|Verticillium_sp_66|Fungi; _Ascomycota; _Pezizomycotina; _Sordariomycetes; _Hypocreomycetidae; _Incertae_sedis; _Plectosphaerellaceae; _Verticillium|-|-')	0	0	0	0	0	0	0	0	0	0	0	5	0	0	0	0	0	0	0	0	0	0	0	0	0	0	0	0	0	0	0	0	0	0	0	0	0	0	0	0	1	0	0	0	0	0	0	0	11
('273', '_', 'FM172863|Calluna_vulgaris_root_associated_fungus|Fungi|-|-')	0	0	0	0	0	0	0	0	0	0	0	0	3	1	0	0	0	0	0	0	0	0	0	0	0	1	0	0	1	0	0	0	0	0	0	0	0	0	0	0	0	0	0	0	0	0	0	0	0
('28', '_', 'AB041243|Allantophomopsis_lycopodina|Fungi; _Ascomycota; _Pezizomycotina; _Leotiomycetes; _Leotiomycetidae; _Helotiales; _Phacidiaceae; _Allantophomopsis|-|-')	0	0	0	0	0	0	0	0	4	0	0	0	0	1	0	0	0	0	0	0	0	1	0	8	4	8	1	0	0	0	0	0	0	0	0	0	0	0	4	0	1	0	0	0	1	3	4	0	0
('280', '_', 'EU884175|Lewia_infectoria|Fungi; _Ascomycota; _Pezizomycotina; _Dothideomycetes; _Pleosporomycetidae; _Pleosporales; _Pleosporaceae; _Lewia; _Lewia_infectoria|-|-')	0	0	0	0	0	0	0	0	0	0	0	0	0	1	0	1	1	0	0	0	0	0	0	0	0	0	0	0	0	0	0	0	0	1	1	0	0	0	0	0	0	0	0	0	0	0	0	2	0
('285', '_', 'EU076951|Umbelopsis_sp_26_M_1|Fungi; _Zygomycota; _Mucoromycotina; _Incertae_sedis; _Incertae_sedis; _Mucorales; _Umbelopsidaceae; _Umbelopsis|-|-')	0	0	0	0	0	0	0	0	0	0	0	0	0	0	0	0	0	0	0	0	0	0	0	0	0	0	0	0	0	0	0	1	0	2	0	0	0	0	0	0	0	0	0	0	0	0	0	1	1
('286', '_', 'AF502859|leaf_litter_ascomycete_strain_its356|Fungi; _Ascomycota|-|-')	0	0	0	0	0	0	0	0	0	0	0	0	0	0	0	0	0	0	0	0	0	0	0	0	0	0	0	0	0	0	3	0	0	0	0	0	0	0	0	0	0	0	0	0	0	0	0	0	0
('287', '_', 'FJ436329|Inocybe_cinnamomea|Fungi; _Basidiomycota; _Agaricomycotina; _Agaricomycetes; _Agaricomycetidae; _Agaricales; _Cortinariaceae; _Inocybe|-|-')	0	0	0	0	0	0	0	0	0	0	0	0	0	0	0	0	0	0	0	0	0	0	0	0	0	2	0	0	0	0	0	0	0	0	0	0	0	0	3	0	0	0	0	0	0	0	0	0	0
('288', '_', 'HQ914825|Lophiostoma_sp_OUCMBI101036|Fungi; _Ascomycota; _Pezizomycotina; _Dothideomycetes; _Pleosporomycetidae; _Pleosporales; _Lophiostomataceae; _Lophiostoma|-|-')	0	0	0	0	1	0	0	0	0	0	0	0	0	0	0	0	0	0	0	0	0	0	0	0	0	0	0	0	0	0	0	0	0	0	0	0	0	0	0	0	0	0	0	0	0	0	0	0	5
('289', '_', 'JN246562|Rhodotorula_colostri|Fungi; _Basidiomycota; _Pucciniomycotina; _Microbotryomycetes; _Incertae_sedis; _Sporidiobolales; _Incertae_sedis; _Rhodotorula|-|-')	0	0	0	0	0	0	0	0	0	0	0	0	0	0	0	0	0	0	0	0	0	0	0	0	0	0	0	0	0	0	0	0	0	0	0	0	0	0	0	0	0	0	1	0	2	0	0	0	0
('290', '_', 'AF163059|Drechslera_triseptata|Fungi; _Ascomycota; _Pezizomycotina; _Dothideomycetes; _Pleosporomycetidae; _Pleosporales; _Pleosporaceae; _Drechslera|-|-')	1	0	0	0	0	1	0	0	0	0	0	0	0	0	0	0	1	0	0	0	4	0	0	0	0	0	0	0	0	0	0	0	0	0	0	0	0	0	0	0	0	0	1	0	0	0	0	0	0
('294', '_', 'AF502722|leaf_litter_ascomycete_strain_its188|Fungi; _Ascomycota|-|-')	0	0	0	0	0	0	0	0	0	0	0	0	0	0	0	0	0	0	0	0	0	0	1	0	0	0	0	0	0	0	0	0	1	3	0	0	0	0	0	0	0	0	0	0	0	0	0	0	0
('30', '_', 'HM190115|Helotiales_sp_2_BB_2010|Fungi; _Ascomycota; _Pezizomycotina; _Leotiomycetes; _Leotiomycetidae; _Helotiales; _Helotiaceae|-|-')	0	0	1	3	0	0	0	0	2	5	0	0	2	0	5	0	0	0	0	0	0	0	12	2	2	3	0	0	2	0	4	0	0	0	1	0	0	0	3	0	1	0	0	0	0	0	0	0	0
('308', '_', 'GU453167|Basidiomycota_sp_BCE|Fungi; _Basidiomycota|Clavulina|Fungi; _Basidiomycota; _Agaricomycotina; _Agaricomycetes; _Incertae_sedis; _Cantharellales; _Clavulinaceae; _Clavulina')	0	0	0	0	0	0	0	0	0	0	0	0	0	0	0	0	0	0	0	0	0	0	0	4	0	0	0	0	0	0	0	0	0	0	0	0	0	0	0	0	0	0	0	0	0	0	0	0	0
('309', '_', 'HQ649990|Hypocreales_sp_s011|Fungi; _Ascomycota; _Pezizomycotina; _Sordariomycetes; _Hypocreomycetidae; _Hypocreales|-|-')	0	0	0	0	0	1	0	0	0	0	0	0	0	0	0	0	0	0	0	0	0	0	0	0	0	0	0	0	0	0	0	2	0	0	0	0	0	0	0	0	0	0	0	0	0	0	0	0	3
('310', '_', 'GQ203774|Preussia_bipartis|Fungi; _Ascomycota; _Pezizomycotina; _Dothideomycetes; _Pleosporomycetidae; _Pleosporales; _Sporormiaceae; _Preussia|-|-')	0	0	0	0	0	0	0	0	0	0	0	0	0	0	0	0	0	0	0	0	0	0	0	0	0	0	0	0	0	0	0	0	0	0	0	0	0	0	0	0	0	0	0	0	0	0	0	0	0
('311', '_', 'GQ409535|Hyphoderma_puberum|Fungi; _Basidiomycota; _Agaricomycotina; _Agaricomycetes; _Incertae_sedis; _Polyporales; _Hyphodermataceae; _Hyphoderma; _Hyphoderma_puberum|-|-')	0	0	0	0	0	0	0	0	0	0	0	0	0	0	0	0	0	0	0	0	0	0	0	0	0	0	0	0	0	0	0	0	0	0	0	0	0	0	0	0	0	0	0	0	0	0	0	0	0
('314', '_', 'JN942266|Cryptococcus_terricola|Fungi; _Basidiomycota; _Agaricomycotina; _Tremellomycetes; _Incertae_sedis; _Filobasidiales; _Filobasidiaceae; _Cryptococcus|-|-')	0	0	4	0	0	0	0	0	0	0	0	0	0	0	0	0	0	0	0	0	1	1	0	0	0	0	0	0	1	0	0	0	0	0	0	0	0	0	0	0	0	0	0	0	0	0	0	0	0
('315', '_', 'FM207639|Ascomycota_sp_Cq_Gry_H7|Fungi; _Ascomycota|-|-')	0	0	0	0	0	0	0	0	0	0	0	0	0	0	0	0	0	0	0	0	0	0	0	0	0	0	0	0	0	0	0	0	0	0	0	0	0	0	0	0	0	0	0	0	0	0	0	0	0
('318', '_', 'JF710512|Alternaria_brassicae|Fungi; _Ascomycota; _Pezizomycotina; _Dothideomycetes; _Pleosporomycetidae; _Pleosporales; _Pleosporaceae; _Alternaria; _Alternaria_brassicae|-|-')	0	0	0	0	0	0	0	0	0	0	0	0	0	0	0	0	0	0	0	0	0	0	2	0	0	0	0	0	0	0	0	0	0	0	0	0	0	0	0	0	0	2	0	0	0	1	0	0	0
('320', '_', 'AY997097|Umbelopsis_ramanniana|Fungi; _Zygomycota; _Mucoromycotina; _Incertae_sedis; _Incertae_sedis; _Mucorales; _Umbelopsidaceae; _Umbelopsis; _Umbelopsis_ramanniana|-|-')	0	0	0	0	0	0	0	0	0	0	0	0	0	0	0	1	0	0	0	0	0	0	1	0	0	0	0	1	0	0	0	0	0	2	0	0	0	0	0	0	0	0	0	0	0	0	0	0	0
('321', '_', 'AY805561|Glarea_sp_olrim537|Fungi; _Ascomycota; _Pezizomycotina; _Leotiomycetes; _Leotiomycetidae; _Helotiales; _Incertae_sedis; _Glarea|-|-')	0	0	0	0	0	0	0	0	0	0	0	0	0	0	0	0	0	0	2	0	0	0	0	0	0	0	0	0	0	0	0	0	0	0	0	0	0	0	0	0	0	0	0	0	0	0	0	0	4
('323', '_', 'DQ402530|Chaunopycnis_sp_ANT_03_065|Fungi; _Ascomycota; _Pezizomycotina; _Sordariomycetes; _Hypocreomycetidae; _Hypocreales; _Ophiocordycipitaceae; _Chaunopycnis|-|-')	0	0	0	0	0	0	0	0	0	0	0	0	0	0	0	0	0	0	0	0	0	0	0	0	0	0	0	0	0	0	0	0	0	0	0	0	0	0	0	0	0	0	0	0	0	0	0	0	0
('330', '_', 'FM172797|Calluna_vulgaris_root_associated_fungus|Fungi|-|-')	0	0	1	0	0	0	0	0	0	0	0	0	0	0	0	0	0	0	0	0	0	0	0	0	0	0	0	0	0	0	0	0	0	0	0	0	0	0	0	0	0	0	0	0	0	0	0	0	0
('336', '_', 'AB360366|Lecanicillium_psalliotae|Fungi; _Ascomycota; _Pezizomycotina; _Sordariomycetes; _Hypocreomycetidae; _Hypocreales; _Cordycipitaceae; _Lecanicillium|-|-')	0	0	1	0	0	0	0	0	0	0	0	0	0	0	0	0	0	0	0	0	0	0	1	0	0	0	0	0	1	0	0	0	0	0	0	0	0	0	0	0	0	0	0	0	0	0	0	0	0
('34', '_', 'EF152528|Mortierella_gamsii|Fungi; _Zygomycota; _Mucoromycotina; _Incertae_sedis; _Incertae_sedis; _Mortierellales; _Mortierellaceae; _Mortierella|-|-')	3	0	0	3	2	0	0	0	0	0	0	7	0	0	0	0	1	0	0	0	1	0	1	0	0	0	0	9	6	0	1	0	0	0	1	2	1	0	0	0	3	1	0	0	0	0	1	0	0
('342', '_', 'FJ466728|Arthrinium_sp_UFMGCB_908|Fungi; _Ascomycota; _Pezizomycotina; _Sordariomycetes; _Sordariomycetidae; _Incertae_sedis; _Apiosporaceae; _Arthrinium|-|-')	0	0	0	0	0	0	0	0	0	0	0	0	0	0	0	0	0	0	0	0	0	0	1	0	0	0	0	0	0	0	0	0	0	1	0	0	0	0	0	0	0	0	0	0	0	0	0	0	0
('349', '_', 'HQ608100|Ascomycota_sp_AR_2010|Fungi; _Ascomycota|-|-')	0	1	0	0	0	0	0	0	1	0	1	0	1	0	0	0	0	0	0	0	0	0	0	3	1	0	1	0	2	0	1	0	0	1	0	0	0	0	0	3	0	0	0	0	0	2	0	0	2
('350', '_', 'HQ623605|Cryptococcus_sp_LCF_20|Fungi; _Basidiomycota; _Agaricomycotina; _Tremellomycetes; _Incertae_sedis; _Filobasidiales; _Filobasidiaceae; _Cryptococcus|-|-')	0	0	0	0	0	1	0	0	0	0	0	0	0	0	0	0	0	0	0	0	0	0	0	0	0	1	0	0	0	0	0	0	1	0	0	0	0	0	0	0	0	0	0	4	0	0	0	0	0
('351', '_', 'HQ829072|Podospora_sp_MAB_2010a|Fungi; _Ascomycota; _Pezizomycotina; _Sordariomycetes; _Sordariomycetidae; _Sordariales; _Lasiosphaeriaceae; _Podospora|-|-')	0	0	1	0	1	0	0	0	0	0	0	0	0	0	0	0	0	0	3	1	0	0	0	0	0	0	0	0	0	0	0	0	0	0	1	0	0	0	0	0	0	0	1	0	0	0	0	0	0
('353', '_', 'FM172839|Calluna_vulgaris_root_associated_fungus|Fungi|-|-')	0	0	0	0	0	0	0	0	0	0	0	0	0	0	0	0	0	0	0	0	0	0	0	0	0	3	0	0	0	0	0	0	0	0	0	0	0	0	0	0	0	0	0	0	0	0	0	0	0
('357', '_', 'UC1859544|Russula_amoenolens|voucher|-|-')	0	0	0	0	0	0	0	0	0	0	0	0	0	0	0	0	0	0	0	0	0	0	0	0	0	0	0	0	0	0	0	0	0	0	0	0	0	0	0	0	0	0	0	2	0	0	0	0	0
('36', '_', 'AY010276|Tomentella_sp_EL274|Fungi; _Basidiomycota; _Agaricomycotina; _Agaricomycetes; _Incertae_sedis; _Thelephorales; _Thelephoraceae; _Tomentella|-|-')	0	0	0	0	0	0	0	56	0	0	0	0	0	0	0	0	0	0	0	0	0	0	0	0	0	0	0	0	0	0	0	0	0	0	0	0	0	0	0	0	0	0	0	0	0	0	0	0	18
('361', '_', 'AY805561|Glarea_sp_olrim537|Fungi; _Ascomycota; _Pezizomycotina; _Leotiomycetes; _Leotiomycetidae; _Helotiales; _Incertae_sedis; _Glarea|-|-')	0	0	0	0	0	0	0	0	0	0	0	0	0	0	0	0	0	0	0	0	0	0	0	0	0	0	0	1	0	0	0	0	0	0	0	0	0	0	0	3	1	0	0	0	0	0	0	0	0
('362', '_', 'FJ238089|Rhodotorula_sp_3_23T|Fungi; _Basidiomycota; _Pucciniomycotina; _Microbotryomycetes; _Incertae_sedis; _Sporidiobolales; _Incertae_sedis; _Rhodotorula|-|-')	0	0	0	0	0	0	1	0	0	0	0	0	0	0	0	0	0	0	0	0	0	0	0	0	0	0	0	0	0	0	0	0	0	0	0	0	0	0	0	0	0	0	0	0	0	0	0	0	0
('368', '_', 'HQ441577|Oliveonia_pauxilla|Fungi; _Basidiomycota; _Agaricomycotina; _Agaricomycetes; _Incertae_sedis; _Auriculariales; _Incertae_sedis; _Oliveonia|-|-')	0	0	0	0	0	0	0	0	0	0	0	0	0	0	0	0	0	0	0	0	0	0	0	0	0	0	0	0	0	0	0	1	0	1	0	0	0	0	0	0	0	0	0	0	0	0	0	0	0
('369', '_', 'JN655577|Helotiales_sp_3_MV_2011|Fungi; _Ascomycota; _Pezizomycotina; _Leotiomycetes; _Leotiomycetidae; _Helotiales|-|-')	0	0	0	0	0	0	0	0	0	0	0	0	1	0	0	0	0	0	0	0	0	0	0	0	0	1	0	0	0	0	0	0	0	1	0	0	0	0	0	0	0	0	0	0	0	0	0	1	0
('37', '_', 'FN669275|Thelephoraceae_sp_B110|Fungi; _Basidiomycota; _Agaricomycotina; _Agaricomycetes; _Incertae_sedis; _Thelephorales; _Thelephoraceae|-|-')	1	3	0	0	0	0	16	0	0	0	0	0	0	0	0	0	0	11	0	0	0	0	0	0	0	0	0	0	0	0	0	0	0	0	0	0	0	0	0	1	0	0	0	0	0	0	0	0	0
('371', '_', 'JN942237|Cryptococcus_cf_aerius_RUB020|Fungi; _Basidiomycota; _Agaricomycotina; _Tremellomycetes; _Incertae_sedis; _Filobasidiales; _Filobasidiaceae; _Cryptococcus|-|-')	0	1	0	0	0	0	0	0	0	0	0	0	0	0	0	0	0	0	0	0	0	0	0	0	0	0	0	0	1	0	0	0	0	0	0	0	0	0	0	0	0	0	0	0	0	0	0	0	0
('379', '_', 'FJ008687|Ascomycota_sp_CH_Nl13LBMM|Fungi; _Ascomycota|-|-')	0	0	0	0	0	0	0	0	1	0	0	0	0	0	0	0	0	0	0	0	1	0	0	0	0	1	0	0	0	0	0	0	1	1	0	0	0	0	0	0	0	2	0	0	0	0	0	0	0
('38', '_', 'FR667230|Chalara_piceae_abietis|Fungi; _Ascomycota; _Pezizomycotina; _Incertae_sedis; _Incertae_sedis; _Incertae_sedis; _Incertae_sedis; _Chalara|-|-')	0	1	0	0	0	0	0	2	6	2	10	0	2	5	0	0	0	1	0	0	0	1	6	3	19	0	2	0	1	0	0	0	0	0	0	0	0	2	0	6	0	0	0	0	0	5	0	0	0
('385', '_', 'FN549910|Fusicladium_cordae|Fungi; _Ascomycota; _Pezizomycotina; _Dothideomycetes; _Pleosporomycetidae; _Pleosporales; _Venturiaceae; _Fusicladium|-|-')	0	0	0	0	0	0	0	0	0	0	0	0	0	0	0	0	0	0	0	0	0	0	0	0	0	0	0	0	0	0	0	0	1	0	0	0	0	0	0	0	0	0	0	0	0	0	0	0	0
('387', '_', 'AJ878777|Mortierella_hyalina|Fungi; _Zygomycota; _Mucoromycotina; _Incertae_sedis; _Incertae_sedis; _Mortierellales; _Mortierellaceae; _Mortierella|-|-')	0	0	0	0	0	0	0	0	0	0	0	0	0	0	0	0	0	0	0	0	0	0	0	0	0	0	0	0	0	0	0	0	0	1	0	0	0	0	0	0	0	0	0	0	0	0	0	0	0
('39', '_', 'TB_Trechispora|Trechispora_hymenocystis|voucher|-|-')	0	0	0	0	0	0	0	0	0	0	0	0	0	22	0	0	0	0	0	0	0	0	0	0	0	0	0	0	0	0	0	0	0	0	0	0	0	0	0	0	0	0	0	0	0	49	0	0	0
('392', '_', 'JN943455|Glomerella_miyabeana|Fungi; _Ascomycota; _Pezizomycotina; _Sordariomycetes; _Sordariomycetidae; _Incertae_sedis; _Glomerellaceae; _Glomerella|-|-')	0	0	0	0	0	0	0	0	0	0	0	0	0	0	0	0	0	0	0	0	0	0	0	0	0	0	0	0	0	0	0	0	0	0	0	0	0	0	0	0	0	0	0	0	0	0	0	0	0
('399', '_', 'HQ115697|Penicillium_canescens|Fungi; _Ascomycota; _Pezizomycotina; _Eurotiomycetes; _Eurotiomycetidae; _Eurotiales; _Trichocomaceae; _Penicillium; _Penicillium_canescens|-|-')	0	1	0	0	0	1	0	0	0	0	0	0	0	0	0	0	0	0	0	0	0	0	0	0	0	0	0	0	0	0	0	0	0	0	0	0	0	0	0	0	0	0	0	0	0	0	0	0	0
('4', '_', 'AM086445|Tomentellopsis_submollis|Fungi; _Basidiomycota; _Agaricomycotina; _Agaricomycetes; _Incertae_sedis; _Thelephorales; _Thelephoraceae; _Tomentellopsis; _Tomentellopsis_submollis|Tomentellopsis|Fungi; _Basidiomycota; _Agaricomycotina; _Agaricomycetes; _Incertae_sedis; _Thelephorales; _Thelephoraceae; _Tomentellopsis')	0	0	0	0	0	0	0	0	0	0	0	0	50	28	0	0	0	0	0	0	0	0	0	0	0	0	0	0	0	0	0	0	0	0	0	0	0	0	0	3	0	0	0	0	30	73	0	0	0
('401', '_', 'HQ604841|Russula_queletii|Fungi; _Basidiomycota; _Agaricomycotina; _Agaricomycetes; _Incertae_sedis; _Russulales; _Russulaceae; _Russula; _Russula_queletii|-|-')	0	0	0	0	0	0	0	0	0	0	0	0	0	0	4	0	0	0	0	0	0	0	0	0	0	0	0	0	0	0	0	0	0	0	0	0	0	0	3	0	0	0	0	0	5	0	0	0	0
('402', '_', 'EU520251|Psathyrella_candolleana|Fungi; _Basidiomycota; _Agaricomycotina; _Agaricomycetes; _Agaricomycetidae; _Agaricales; _Psathyrellaceae; _Psathyrella; _Psathyrella_candolleana|Psathyrella|Fungi; _Basidiomycota; _Agaricomycotina; _Agaricomycetes; _Agaricomycetidae; _Agaricales; _Psathyrellaceae; _Psathyrella')	0	0	0	0	0	0	0	0	0	0	0	0	0	0	0	0	0	0	0	0	0	0	0	0	0	0	0	0	0	0	0	1	0	0	0	0	0	0	0	0	3	0	0	0	0	0	0	0	16
('405', '_', 'EF029204|Helicoon_aff_maioricense_ICMP14919|Fungi; _Ascomycota; _Pezizomycotina; _Orbiliomycetes; _Orbiliomycetidae; _Orbiliales; _Orbiliaceae|-|-')	0	0	0	0	0	0	0	0	0	0	0	0	0	0	0	0	0	0	0	0	0	0	0	3	0	2	0	0	0	0	0	0	0	0	0	0	0	0	0	0	0	0	0	0	0	0	0	0	0
('411', '_', 'JN198473|Mortierella_sp_2_C37|Fungi; _Zygomycota; _Mucoromycotina; _Incertae_sedis; _Incertae_sedis; _Mortierellales; _Mortierellaceae; _Mortierella|-|-')	0	0	0	0	0	4	0	0	0	0	0	0	0	0	0	0	0	0	0	0	0	0	0	0	0	0	0	0	0	0	0	0	0	0	0	0	0	0	0	0	0	0	0	0	0	0	0	0	0
('414', '_', 'JF502424|Helminthosporium_velutinum|Fungi; _Ascomycota; _Pezizomycotina; _Dothideomycetes; _Pleosporomycetidae; _Pleosporales; _Pleomassariaceae; _Helminthosporium|-|-')	0	0	0	0	0	0	0	0	0	0	0	0	0	0	0	0	0	0	0	0	0	0	0	0	0	0	0	0	0	0	0	0	0	0	0	0	0	0	0	0	1	0	0	0	0	0	0	0	0
('416', '_', 'AY046400|ericoid_mycorrhizal_sp_Sm5|Fungi; _Ascomycota; _Pezizomycotina; _Leotiomycetes; _Leotiomycetidae; _Helotiales|Helotiales|Fungi; _Ascomycota; _Pezizomycotina; _Leotiomycetes; _Leotiomycetidae; _Helotiales')	0	1	0	0	0	0	0	0	0	0	0	0	0	0	0	0	0	0	0	0	0	0	0	0	0	0	0	0	0	0	0	0	0	0	0	0	0	0	0	0	1	0	0	0	0	0	0	0	0
('42', '_', 'HQ215811|Tomentella_sp_OTU204|Fungi; _Basidiomycota; _Agaricomycotina; _Agaricomycetes; _Incertae_sedis; _Thelephorales; _Thelephoraceae; _Tomentella|-|-')	0	3	0	1	0	0	0	28	0	1	0	0	0	0	0	0	0	0	0	0	0	0	2	0	0	0	0	1	0	0	0	0	0	0	0	0	0	0	0	0	21	0	0	0	23	0	0	0	0
('420', '_', 'HQ630362|Mortierella_elongata|Fungi; _Zygomycota; _Mucoromycotina; _Incertae_sedis; _Incertae_sedis; _Mortierellales; _Mortierellaceae; _Mortierella; _Mortierella_elongata|-|-')	0	0	1	0	0	0	0	0	0	0	0	0	0	0	0	0	0	0	0	0	0	0	2	0	0	0	0	0	0	0	0	0	0	0	0	0	0	0	0	0	0	0	0	0	0	0	0	0	0
('426', '_', 'HQ157908|Hyaloscyphaceae_sp_II_GK_2010|Fungi; _Ascomycota; _Pezizomycotina; _Leotiomycetes; _Leotiomycetidae; _Helotiales; _Hyaloscyphaceae|-|-')	0	0	0	0	0	0	0	0	0	0	0	0	0	0	0	0	0	1	0	0	0	0	0	0	0	0	0	0	0	0	0	0	0	0	0	0	0	0	0	0	0	0	0	0	0	0	0	0	0
('430', '_', 'EU834223|Tuber_pacificum|Fungi; _Ascomycota; _Pezizomycotina; _Pezizomycetes; _Pezizomycetidae; _Pezizales; _Tuberaceae; _Tuber|Tuber|Fungi; _Ascomycota; _Pezizomycotina; _Pezizomycetes; _Pezizomycetidae; _Pezizales; _Tuberaceae; _Tuber')	0	0	0	0	0	0	0	2	0	0	0	0	0	0	0	0	0	0	0	0	0	0	0	0	0	0	0	0	0	0	0	0	4	0	0	0	0	0	0	0	0	0	0	0	0	0	0	0	0
('431', '_', 'AB038128|Rhodotorula_acheniorum|Fungi; _Basidiomycota; _Pucciniomycotina; _Microbotryomycetes; _Incertae_sedis; _Sporidiobolales; _Incertae_sedis; _Rhodotorula|-|-')	0	0	0	0	0	0	0	0	0	0	0	0	0	0	0	0	0	0	0	0	0	0	0	0	0	0	0	0	0	0	0	0	0	1	0	0	0	0	0	0	0	0	0	0	0	0	0	0	0
('432', '_', 'AY751561|Thelephoraceae_sp_EC200_B381|Fungi; _Basidiomycota; _Agaricomycotina; _Agaricomycetes; _Incertae_sedis; _Thelephorales; _Thelephoraceae|-|-')	0	0	0	0	0	0	0	0	0	0	0	0	0	0	0	0	0	0	0	0	0	0	0	0	0	0	0	0	0	0	0	0	0	0	0	0	0	0	0	0	0	0	0	0	0	0	0	0	0
('437', '_', 'GU067737|Ceratobasidium_sp_257|Fungi; _Basidiomycota; _Agaricomycotina; _Agaricomycetes; _Incertae_sedis; _Cantharellales; _Ceratobasidiaceae; _Ceratobasidium|-|-')	0	0	0	0	0	0	0	0	0	0	0	0	0	0	0	0	1	0	0	0	0	0	0	0	0	0	0	0	0	0	0	0	0	0	0	0	0	0	0	0	0	0	0	0	0	0	0	0	1
('441', '_', 'Y17092|Hypomyces_rosellus|Fungi; _Ascomycota; _Pezizomycotina; _Sordariomycetes; _Hypocreomycetidae; _Hypocreales; _Hypocreaceae; _Hypomyces; _Hypomyces_rosellus|-|-')	0	0	0	0	0	0	0	0	0	0	0	0	0	0	0	0	0	0	0	0	0	0	0	0	0	0	0	0	0	0	0	0	0	0	0	0	0	0	0	0	0	0	0	0	0	0	0	0	0
('443', '_', 'EF543844|Cephalosporium_serrae_var_fuscum|Fungi; _Ascomycota; _Pezizomycotina; _Sordariomycetes; _Hypocreomycetidae; _Hypocreales; _Incertae_sedis; _Cephalosporium|-|-')	0	0	0	0	0	0	0	0	0	0	0	1	0	0	0	0	0	0	1	0	0	0	0	0	0	0	0	0	0	0	0	0	0	0	0	0	0	0	0	0	0	0	0	0	0	0	0	0	0
('449', '_', 'JF310740|Cordyceps_confragosa|Fungi; _Ascomycota; _Pezizomycotina; _Sordariomycetes; _Hypocreomycetidae; _Hypocreales; _Clavicipitaceae; _Cordyceps|-|-')	0	0	0	0	0	0	0	0	0	0	0	0	0	0	0	0	0	0	0	0	0	0	0	0	0	0	0	0	0	0	0	0	1	0	0	0	0	0	0	0	0	1	0	0	0	0	0	0	0
('451', '_', 'EU819522|Tomentella_badia|Fungi; _Basidiomycota; _Agaricomycotina; _Agaricomycetes; _Incertae_sedis; _Thelephorales; _Thelephoraceae; _Tomentella; _Tomentella_badia|-|-')	1	0	0	0	0	0	0	0	0	0	0	0	0	0	0	0	0	0	28	0	0	0	0	0	0	0	0	0	0	0	0	0	0	0	0	0	0	0	0	0	0	0	0	0	0	0	0	0	0
('452', '_', 'HQ215818|Tomentella_sp_OTU203|Fungi; _Basidiomycota; _Agaricomycotina; _Agaricomycetes; _Incertae_sedis; _Thelephorales; _Thelephoraceae; _Tomentella|-|-')	0	0	0	0	0	0	0	2	0	0	0	0	0	0	0	0	0	0	0	0	0	0	0	0	0	0	0	0	0	0	0	0	0	0	0	0	0	0	0	0	0	0	0	0	0	0	0	0	0
('462', '_', 'AM292202|ascomycete_sp_Artz_105|Fungi; _Ascomycota|-|-')	0	0	0	0	0	0	0	0	0	0	0	0	0	0	1	0	0	0	0	0	0	0	0	0	0	0	0	0	0	0	0	0	0	0	0	0	0	0	0	0	0	0	0	0	0	0	0	0	0
('47', '_', 'EU035472|Venturia_sp_CBS_68174|Fungi; _Ascomycota; _Pezizomycotina; _Dothideomycetes; _Pleosporomycetidae; _Pleosporales; _Venturiaceae; _Venturia|-|-')	0	2	0	0	0	0	0	0	0	0	0	0	0	0	0	1	0	0	0	0	0	0	0	0	0	0	0	0	0	0	0	2	0	0	0	0	0	0	0	0	0	0	0	0	4	0	29	2	0
('473', '_', 'HQ630362|Mortierella_elongata|Fungi; _Zygomycota; _Mucoromycotina; _Incertae_sedis; _Incertae_sedis; _Mortierellales; _Mortierellaceae; _Mortierella; _Mortierella_elongata|-|-')	0	0	0	0	0	0	0	0	0	1	0	1	0	0	0	0	0	1	0	2	5	3	0	0	0	0	0	0	0	0	1	0	0	0	0	2	2	0	0	0	2	0	0	0	0	0	0	1	0
('48', '_', 'HQ630362|Mortierella_elongata|Fungi; _Zygomycota; _Mucoromycotina; _Incertae_sedis; _Incertae_sedis; _Mortierellales; _Mortierellaceae; _Mortierella; _Mortierella_elongata|-|-')	0	1	0	0	0	0	0	0	0	0	0	0	0	0	0	0	0	0	0	0	0	0	2	0	0	0	0	0	0	0	1	2	0	0	1	0	0	0	0	0	1	1	0	0	0	0	3	0	1
('484', '_', 'AY243057|ascomycete_sp_Ano18|Fungi; _Ascomycota|-|-')	0	0	0	0	0	0	0	0	0	0	0	0	0	0	0	0	0	0	0	0	2	0	0	0	0	0	0	0	0	0	0	0	0	0	0	0	0	0	0	0	0	0	0	0	0	0	0	0	0
('488', '_', 'AF455415|Saccharicola_bicolor|Fungi; _Ascomycota; _Pezizomycotina; _Dothideomycetes; _Pleosporomycetidae; _Pleosporales; _Massarinaceae; _Saccharicola|-|-')	0	0	0	0	0	0	0	1	0	0	0	0	0	0	0	0	0	0	0	0	0	0	0	0	0	0	0	0	0	0	0	0	0	0	0	0	0	0	0	0	0	0	0	0	0	0	0	3	0
('490', '_', 'HQ533015|Tomentellopsis_sp_PDD_95789|Fungi; _Basidiomycota; _Agaricomycotina; _Agaricomycetes; _Incertae_sedis; _Thelephorales; _Thelephoraceae; _Tomentellopsis|Tomentellopsis|Fungi; _Basidiomycota; _Agaricomycotina; _Agaricomycetes; _Incertae_sedis; _Thelephorales; _Thelephoraceae; _Tomentellopsis')	0	0	0	0	0	0	0	0	0	0	0	0	0	0	0	0	0	0	0	0	0	0	0	0	0	0	0	0	0	0	0	0	0	0	0	0	0	0	0	0	0	0	0	0	0	0	0	0	0
('492', '_', 'HQ630293|Mortierella_gemmifera|Fungi; _Zygomycota; _Mucoromycotina; _Incertae_sedis; _Incertae_sedis; _Mortierellales; _Mortierellaceae; _Mortierella|-|-')	0	0	0	0	0	0	0	0	0	0	0	0	0	0	0	0	0	0	0	0	0	0	0	4	0	0	0	0	0	0	0	0	0	0	0	0	0	0	0	0	0	0	0	0	0	2	0	0	0
('493', '_', 'AB378517|Lecanicillium_fusisporum|Fungi; _Ascomycota; _Pezizomycotina; _Sordariomycetes; _Hypocreomycetidae; _Hypocreales; _Cordycipitaceae; _Lecanicillium|-|-')	0	0	0	0	0	0	0	0	0	0	0	0	0	0	0	0	0	2	0	0	1	1	0	0	0	0	0	0	0	0	0	0	0	0	0	0	0	1	0	0	0	0	0	0	0	0	0	0	0
('495', '_', 'AB105968|Colletotrichum_sp_MAFF_238561|Fungi; _Ascomycota; _Pezizomycotina; _Sordariomycetes; _Incertae_sedis; _Phyllachorales; _Phyllachoraceae; _Colletotrichum|-|-')	0	0	0	0	0	0	0	0	0	0	0	0	0	0	0	0	0	0	0	0	0	0	0	0	0	0	0	0	0	0	0	0	0	0	0	0	0	0	0	0	0	0	0	0	0	0	0	0	0
('5', '_', 'UC1859522|Russula_sanguinea|voucher|-|-')	0	0	0	0	0	0	0	0	6	0	35	0	3	0	18	0	0	2	0	0	0	0	0	0	15	26	4	0	0	0	0	0	0	0	0	0	0	8	21	0	0	0	0	0	0	0	0	0	0
('502', '_', 'JN943017|Mortierella_humilis|Fungi; _Zygomycota; _Mucoromycotina; _Incertae_sedis; _Incertae_sedis; _Mortierellales; _Mortierellaceae; _Mortierella; _Mortierella_humilis|-|-')	8	0	4	32	1	1	0	0	41	2	42	14	7	13	41	0	0	70	12	2	16	12	15	110	3	65	65	129	67	2	31	0	119	4	1	0	2	18	17	11	13	56	1	1	9	9	32	19	0
('505', '_', 'EU314707|Phialophora_sp_DF33|Fungi; _Ascomycota; _Pezizomycotina; _Eurotiomycetes; _Chaetothyriomycetidae; _Chaetothyriales; _Herpotrichiellaceae; _Phialophora|-|-')	0	0	0	0	0	0	0	0	0	0	0	0	0	0	0	0	0	0	0	0	0	0	0	0	0	0	0	0	0	0	0	0	0	1	0	0	0	0	0	0	0	0	0	0	0	0	0	0	0
('508', '_', 'GU586855|Volutella_ciliata|Fungi; _Ascomycota; _Pezizomycotina; _Sordariomycetes; _Hypocreomycetidae; _Hypocreales; _Nectriaceae; _Volutella; _Volutella_ciliata|-|-')	0	0	0	0	0	0	0	0	0	0	0	0	0	0	0	0	0	0	0	0	0	0	0	0	0	0	0	0	0	0	0	0	0	0	0	0	0	0	0	0	0	0	0	0	0	0	0	0	0
('514', '_', 'FJ426987|Paraphoma_chrysanthemicola|Fungi; _Ascomycota; _Pezizomycotina; _Dothideomycetes; _Pleosporomycetidae; _Pleosporales; _Leptosphaeriaceae; _Paraphoma|-|-')	0	0	1	0	0	0	0	0	0	0	0	0	0	0	0	0	0	0	0	0	0	0	0	0	0	0	0	0	0	0	0	0	0	0	0	0	0	0	0	0	0	0	0	0	0	0	0	0	0
('518', '_', 'HQ875392|Cryptococcus_sp_CBS_8979|Fungi; _Basidiomycota; _Agaricomycotina; _Tremellomycetes; _Incertae_sedis; _Filobasidiales; _Filobasidiaceae; _Cryptococcus|-|-')	0	0	0	0	0	0	0	0	0	0	0	0	0	0	0	0	0	0	0	0	0	0	0	0	0	0	0	0	0	0	0	0	1	2	0	0	0	0	0	0	0	0	0	0	0	0	0	0	0
('52', '_', 'HQ630318|Mortierella_clonocystis|Fungi; _Zygomycota; _Mucoromycotina; _Incertae_sedis; _Incertae_sedis; _Mortierellales; _Mortierellaceae; _Mortierella|-|-')	0	0	0	0	0	0	0	0	0	0	0	0	0	0	0	0	0	0	5	0	2	0	0	1	2	0	0	1	0	0	0	0	1	1	9	0	1	0	0	5	0	0	12	0	0	0	0	1	0
('523', '_', 'AY230780|Woollsia_root_associated_fungus_X|Fungi; _Ascomycota|-|-')	0	0	0	0	0	1	0	0	0	0	0	0	0	0	0	0	0	0	0	0	0	0	0	0	0	0	0	0	0	0	3	0	0	0	0	0	0	0	0	0	0	0	0	0	0	0	0	0	0
('524', '_', 'HM485379|Tuber_pacificum|Fungi; _Ascomycota; _Pezizomycotina; _Pezizomycetes; _Pezizomycetidae; _Pezizales; _Tuberaceae; _Tuber|Tuber|Fungi; _Ascomycota; _Pezizomycotina; _Pezizomycetes; _Pezizomycetidae; _Pezizales; _Tuberaceae; _Tuber')	0	0	0	2	0	4	0	0	0	0	0	0	0	0	0	0	0	3	0	0	0	0	0	0	0	0	0	0	0	0	1	0	0	0	0	0	0	0	0	0	0	57	0	0	0	0	0	0	0
('53', '_', 'FN669261|Thelephoraceae_sp_P321|Fungi; _Basidiomycota; _Agaricomycotina; _Agaricomycetes; _Incertae_sedis; _Thelephorales; _Thelephoraceae|-|-')	38	0	0	0	0	0	0	0	0	0	0	0	0	0	0	0	0	0	0	0	0	0	0	0	0	0	0	0	0	0	0	0	0	0	0	0	0	0	0	0	0	0	0	0	0	0	0	0	0
('534', '_', 'FJ379809|Penicillium_sp_FF18|Fungi; _Ascomycota; _Pezizomycotina; _Eurotiomycetes; _Eurotiomycetidae; _Eurotiales; _Trichocomaceae; _Penicillium|-|-')	0	0	0	0	0	0	0	0	0	0	0	0	0	0	0	0	0	0	0	0	0	0	0	0	0	0	0	0	0	0	0	1	0	0	0	0	0	0	0	0	0	0	0	0	0	0	0	0	0
('543', '_', 'HQ441577|Oliveonia_pauxilla|Fungi; _Basidiomycota; _Agaricomycotina; _Agaricomycetes; _Incertae_sedis; _Auriculariales; _Incertae_sedis; _Oliveonia|-|-')	0	0	0	0	0	0	0	0	0	0	0	0	0	0	0	0	0	0	0	0	0	0	0	0	0	0	0	0	0	0	0	0	0	0	0	0	0	0	0	0	0	0	0	0	0	0	0	0	0
('545', '_', 'EU543253|Myrmecridium_schulzeri|Fungi; _Ascomycota; _Pezizomycotina; _Sordariomycetes; _Incertae_sedis; _Incertae_sedis; _Incertae_sedis; _Myrmecridium|-|-')	0	0	0	0	0	0	0	0	0	0	0	0	0	0	0	0	0	0	0	0	0	0	0	0	0	0	0	0	0	0	0	0	0	0	0	0	0	0	0	0	0	0	0	0	0	0	0	0	0
('546', '_', 'GQ411269|Varicosporium_elodeae|Fungi; _Ascomycota; _Pezizomycotina; _Leotiomycetes; _Leotiomycetidae; _Helotiales; _Helotiaceae; _Varicosporium; _Varicosporium_elodeae|-|-')	0	0	0	0	0	0	0	0	0	0	0	0	0	0	0	0	0	0	0	0	0	0	0	0	0	0	0	0	0	0	0	0	0	0	1	0	0	0	0	0	0	0	0	0	0	0	0	0	0
('55', '_', 'JN943017|Mortierella_humilis|Fungi; _Zygomycota; _Mucoromycotina; _Incertae_sedis; _Incertae_sedis; _Mortierellales; _Mortierellaceae; _Mortierella; _Mortierella_humilis|-|-')	0	0	0	3	0	0	0	0	0	0	0	0	0	0	0	0	0	0	0	0	0	0	2	6	0	8	5	4	3	0	0	0	0	0	0	0	0	0	2	3	0	0	0	0	0	0	0	0	0
('550', '_', 'UC1860114|Entoloma_cetratum|voucher|-|-')	0	0	0	0	0	0	0	0	0	0	0	0	0	0	0	0	0	0	0	0	0	0	0	0	0	0	0	0	0	0	0	0	0	0	0	0	0	0	0	0	0	3	0	0	0	0	0	0	0
('552', '_', 'EF530929|Tricholomopsis_rutilans|Fungi; _Basidiomycota; _Agaricomycotina; _Agaricomycetes; _Agaricomycetidae; _Agaricales; _Tricholomataceae; _Tricholomopsis; _Tricholomopsis_rutilans|-|-')	0	0	0	0	0	0	0	0	0	0	0	0	0	0	0	0	0	0	0	0	0	0	0	0	0	0	0	0	0	0	0	0	0	0	0	0	0	0	0	0	0	0	0	0	0	0	0	0	0
('553', '_', 'AY618223|Ceratobasidium_sp_olrim768|Fungi; _Basidiomycota; _Agaricomycotina; _Agaricomycetes; _Incertae_sedis; _Cantharellales; _Ceratobasidiaceae; _Ceratobasidium|-|-')	0	0	0	0	0	0	0	2	0	0	0	0	0	0	0	0	0	0	0	0	0	0	0	0	0	0	0	0	0	0	0	1	0	0	0	0	0	0	0	0	0	0	1	0	0	0	0	0	0
('558', '_', 'GU727552|Cistella_acuum|Fungi; _Ascomycota; _Pezizomycotina; _Leotiomycetes; _Leotiomycetidae; _Helotiales; _Hyaloscyphaceae; _Cistella; _Cistella_acuum|-|-')	0	0	0	0	0	0	0	0	0	0	0	0	0	0	0	0	0	0	0	0	0	0	0	0	0	0	0	0	0	0	0	0	0	0	0	0	0	0	0	0	0	0	0	0	0	0	0	0	0
('56', '_', 'HM147820|Phoma_aff_macrostoma_BBA_72146|Fungi; _Ascomycota; _Pezizomycotina; _Dothideomycetes; _Pleosporomycetidae; _Pleosporales; _Incertae_sedis; _Phoma|-|-')	0	0	0	0	0	0	0	0	1	0	0	0	0	0	0	0	0	0	0	0	0	0	0	0	0	0	0	0	0	0	0	0	0	0	0	0	0	0	0	0	0	0	0	0	0	0	0	0	0
('562', '_', 'AY046402|ericoid_mycorrhizal_sp_Sm3|Fungi; _Ascomycota; _Pezizomycotina; _Leotiomycetes; _Leotiomycetidae; _Helotiales|-|-')	0	0	0	0	0	0	0	0	0	0	0	0	0	0	0	0	0	0	0	0	0	0	0	0	0	0	0	0	0	0	0	0	0	0	0	0	0	0	0	0	0	0	0	0	0	0	0	0	0
('565', '_', 'AM262366|Stagonospora_sp_SS_1575|Fungi; _Ascomycota; _Pezizomycotina; _Dothideomycetes; _Pleosporomycetidae; _Pleosporales; _Phaeosphaeriaceae; _Stagonospora|-|-')	0	0	0	0	0	0	0	0	0	0	0	0	0	0	0	0	0	0	0	0	0	0	0	0	0	0	0	0	1	0	0	0	0	0	0	0	0	0	0	0	0	0	0	0	0	0	0	0	0
('577', '_', 'AB479306|Penicillium_brevicompactum|Fungi; _Ascomycota; _Pezizomycotina; _Eurotiomycetes; _Eurotiomycetidae; _Eurotiales; _Trichocomaceae; _Penicillium; _Penicillium_brevicompactum|-|-')	0	0	0	0	0	0	0	0	0	0	0	0	0	1	0	0	0	0	0	0	0	0	0	0	0	0	0	0	0	0	0	0	0	0	0	0	0	0	0	0	0	1	0	0	0	0	0	0	0
('580', '_', 'HQ630348|Mortierella_cystojenkinii|Fungi; _Zygomycota; _Mucoromycotina; _Incertae_sedis; _Incertae_sedis; _Mortierellales; _Mortierellaceae; _Mortierella|-|-')	0	0	0	0	0	0	0	0	0	0	0	0	0	0	0	0	0	0	0	0	0	0	0	0	0	0	0	0	0	0	0	0	0	0	0	1	0	0	0	0	0	0	0	0	0	0	0	0	0
('582', '_', 'HQ115713|Massarina_rubi|Fungi; _Ascomycota; _Pezizomycotina; _Dothideomycetes; _Pleosporomycetidae; _Pleosporales; _Lophiostomataceae; _Massarina|-|-')	0	0	0	0	0	0	0	0	0	0	0	0	0	0	0	0	0	0	0	0	0	0	0	0	0	0	0	0	0	0	0	0	1	0	0	0	0	0	0	0	0	0	0	0	0	0	0	0	0
('584', '_', 'AY880942|Wilcoxina_mikolae|Fungi; _Ascomycota; _Pezizomycotina; _Pezizomycetes; _Pezizomycetidae; _Pezizales; _Pyronemataceae; _Wilcoxina; _Wilcoxina_mikolae|-|-')	0	0	0	0	0	0	0	0	0	0	0	0	0	0	0	0	0	0	0	0	0	0	0	0	0	0	0	0	0	0	0	0	0	0	1	0	0	0	0	0	0	0	0	0	0	0	0	0	0
('588', '_', 'GU322862|Peniophora_laeta|Fungi; _Basidiomycota; _Agaricomycotina; _Agaricomycetes; _Incertae_sedis; _Russulales; _Peniophoraceae; _Peniophora; _Peniophora_laeta|-|-')	0	0	0	0	0	0	0	0	0	0	0	0	0	0	0	0	0	0	1	0	0	0	0	0	0	0	0	0	0	0	0	0	0	0	0	0	0	0	0	0	0	0	0	0	0	0	0	0	0
('589', '_', 'U57493|Microscypha_ellisii|Fungi; _Ascomycota; _Pezizomycotina; _Leotiomycetes; _Leotiomycetidae; _Helotiales; _Hyaloscyphaceae; _Microscypha|-|-')	0	0	0	0	0	0	0	0	0	0	0	0	0	0	0	0	0	0	0	0	0	0	0	0	0	0	0	0	0	0	0	0	0	0	0	1	0	0	0	0	0	0	0	0	0	0	0	0	0
('59', '_', 'AJ292406|Pochonia_suchlasporia_var_catenata|Fungi; _Ascomycota; _Pezizomycotina; _Sordariomycetes; _Hypocreomycetidae; _Hypocreales; _Clavicipitaceae; _Pochonia|-|-')	4	2	0	1	0	1	0	0	0	0	1	15	0	0	0	0	0	0	0	0	0	0	0	0	0	0	1	0	7	0	0	0	0	0	0	0	2	0	0	0	0	3	0	1	1	0	0	1	0
('592', '_', 'FR718465|Ascomycota_sp_BF052|Fungi; _Ascomycota|-|-')	0	0	0	0	0	0	0	0	0	0	0	0	0	0	0	0	0	0	0	0	0	0	0	0	0	0	0	0	0	0	0	0	0	0	0	0	0	0	0	0	0	0	0	0	0	0	0	0	1
('594', '_', 'EU715665|Pestalotiopsis_microspora|Fungi; _Ascomycota; _Pezizomycotina; _Sordariomycetes; _Xylariomycetidae; _Xylariales; _Amphisphaeriaceae; _Pestalotiopsis|-|-')	0	0	0	0	0	0	0	0	0	0	0	0	0	0	0	0	0	0	0	0	0	0	1	1	1	0	0	0	0	0	0	0	0	0	0	0	1	0	0	0	0	0	0	0	0	0	0	0	0
('595', '_', 'AF502615|leaf_litter_ascomycete_strain_its020|Fungi; _Ascomycota|-|-')	0	0	0	0	0	0	0	0	0	0	0	0	0	0	0	0	0	0	0	1	0	0	0	0	0	0	0	0	0	0	0	0	0	0	0	0	0	0	0	0	0	0	0	0	0	0	0	0	0
('596', '_', 'GU453167|Basidiomycota_sp_BCE|Fungi; _Basidiomycota|Clavulina|Fungi; _Basidiomycota; _Agaricomycotina; _Agaricomycetes; _Incertae_sedis; _Cantharellales; _Clavulinaceae; _Clavulina')	0	0	0	0	0	0	0	0	0	0	0	0	0	0	0	0	0	0	0	0	0	1	0	0	0	0	0	0	0	0	0	0	0	0	0	0	0	0	0	0	0	0	0	0	0	0	0	0	0
('599', '_', 'UDB002429|-|-|Tomentella_stuposa|Fungi; _Basidiomycota; _Agaricomycotina; _Agaricomycetes; _Incertae_sedis; _Thelephorales; _Thelephoraceae; _Tomentella; _Tomentella_stuposa')	0	0	0	0	9	0	0	0	0	0	0	1	0	0	0	0	0	0	0	0	0	20	0	0	0	0	0	0	0	0	0	0	0	0	0	0	0	0	0	0	16	0	0	67	0	0	0	0	2
('600', '_', 'GU062230|Basidiomycota_sp_I130|Fungi; _Basidiomycota|-|-')	0	0	0	0	0	0	0	0	0	0	0	0	0	6	0	0	0	0	0	0	0	0	0	0	0	0	0	0	0	0	0	0	0	0	0	0	0	0	0	0	0	0	0	0	0	0	0	0	0
('601', '_', 'FJ860841|Hypocrea_sinuosa|Fungi; _Ascomycota; _Pezizomycotina; _Sordariomycetes; _Hypocreomycetidae; _Hypocreales; _Hypocreaceae; _Hypocrea|-|-')	0	0	0	0	0	0	0	0	0	0	0	0	0	1	0	0	0	0	0	0	0	0	0	5	0	0	0	0	0	0	0	0	0	0	0	0	0	0	0	0	0	0	0	0	0	0	0	0	0
('602', '_', 'F103|Suillus_pungens|voucher|-|-')	0	0	0	0	0	0	0	0	0	0	0	0	0	0	0	0	0	0	0	0	0	0	0	0	0	0	0	0	0	6	0	0	0	0	0	0	0	0	0	0	0	0	0	0	0	0	0	0	0
('603', '_', 'HQ630291|Mortierella_globulifera|Fungi; _Zygomycota; _Mucoromycotina; _Incertae_sedis; _Incertae_sedis; _Mortierellales; _Mortierellaceae; _Mortierella|-|-')	0	0	0	0	0	0	0	0	0	0	0	0	0	0	1	0	0	0	0	0	0	0	0	0	0	1	0	0	0	0	0	0	0	0	0	0	0	0	2	0	1	0	0	0	2	0	2	0	0
('608', '_', 'UDB003218|-|-|Amanita_friabilis|Fungi; _Basidiomycota; _Agaricomycotina; _Agaricomycetes; _Agaricomycetidae; _Agaricales; _Amanitaceae; _Amanita; _Amanita_friabilis')	0	0	0	0	0	0	0	0	0	0	2	0	0	0	0	0	0	0	0	0	0	0	0	0	0	0	0	0	0	0	0	0	0	0	0	0	0	0	0	0	0	0	0	0	0	0	0	0	0
('619', '_', 'AJ417495|Cladosporium_sp_ascomyc1|Fungi; _Ascomycota; _Pezizomycotina; _Dothideomycetes; _Dothideomycetidae; _Capnodiales; _Mycosphaerellaceae; _Cladosporium|-|-')	0	0	0	0	0	0	0	0	0	0	0	0	0	0	0	0	1	0	0	0	1	0	0	0	0	0	0	0	0	0	0	0	0	0	0	0	0	0	0	0	0	0	0	0	0	0	0	0	0
('622', '_', 'DQ398957|Uthatobasidium_fusisporum|Fungi; _Basidiomycota; _Agaricomycotina; _Agaricomycetes; _Incertae_sedis; _Cantharellales; _Ceratobasidiaceae; _Uthatobasidium; _Uthatobasidium_fusisporum|-|-')	0	0	0	0	0	0	0	0	0	0	0	0	0	0	0	0	0	0	0	0	0	0	0	0	0	0	0	0	2	0	0	0	0	0	0	0	0	0	0	0	0	0	0	0	0	0	0	0	0
('629', '_', 'GQ169327|Sagenomella_striatispora|Fungi; _Ascomycota; _Pezizomycotina; _Eurotiomycetes; _Eurotiomycetidae; _Eurotiales; _Trichocomaceae; _Sagenomella|-|-')	0	0	0	0	0	0	0	0	0	0	0	0	0	0	0	0	0	0	0	0	0	0	0	0	0	0	0	0	0	0	0	0	0	0	0	0	0	0	0	0	0	2	1	0	0	0	0	0	0
('634', '_', 'DQ914662|Acremonium_alternatum|Fungi; _Ascomycota; _Pezizomycotina; _Sordariomycetes; _Hypocreomycetidae; _Hypocreales; _Incertae_sedis; _Acremonium; _Acremonium_alternatum|-|-')	0	0	0	0	0	0	0	0	0	0	0	0	0	0	0	0	0	0	0	0	0	0	0	0	1	0	0	0	0	0	0	0	0	0	0	0	0	0	0	0	0	0	0	0	0	0	0	0	0
('641', '_', 'AF429426|Hypochnicium_geogenium|Fungi; _Basidiomycota; _Agaricomycotina; _Agaricomycetes; _Incertae_sedis; _Polyporales; _Hyphodermataceae; _Hypochnicium; _Hypochnicium_geogenium|-|-')	0	0	0	0	0	0	0	0	0	0	0	0	0	0	0	0	0	0	0	0	0	0	0	0	0	0	0	0	0	0	0	0	0	0	0	0	0	0	0	0	0	0	0	0	0	0	0	0	0
('656', '_', 'HQ166377|Penicillium_expansum|Fungi; _Ascomycota; _Pezizomycotina; _Eurotiomycetes; _Eurotiomycetidae; _Eurotiales; _Trichocomaceae; _Penicillium; _Penicillium_expansum|-|-')	0	0	0	0	0	0	0	0	0	0	0	0	0	0	0	0	0	0	0	0	0	0	0	0	0	0	0	0	0	0	0	0	0	0	0	0	0	0	0	0	0	0	0	0	0	0	0	0	0
('666', '_', 'GQ922548|Podospora_curvicolla|Fungi; _Ascomycota; _Pezizomycotina; _Sordariomycetes; _Sordariomycetidae; _Sordariales; _Lasiosphaeriaceae; _Podospora|-|-')	0	0	0	0	0	0	0	0	0	0	0	0	0	0	0	0	0	0	0	0	0	0	0	0	0	0	0	0	0	0	0	0	0	0	1	0	0	0	0	0	0	0	2	0	0	0	0	0	0
('683', '_', 'FJ914658|Doratomyces_stemonitis||-|-')	0	0	0	0	0	0	0	0	0	0	0	0	0	0	0	0	0	0	0	0	0	0	0	0	0	0	0	0	0	0	0	0	0	0	0	0	0	0	0	0	0	0	0	0	0	0	0	0	2
('694', '_', 'DQ335471|Lambertella_pruni|Fungi; _Ascomycota; _Pezizomycotina; _Leotiomycetes; _Leotiomycetidae; _Helotiales; _Rutstroemiaceae; _Lambertella|-|-')	0	0	0	0	1	0	0	0	0	0	0	0	0	0	0	0	0	0	0	0	0	0	0	0	0	0	0	0	0	1	0	0	0	0	0	0	0	0	0	0	0	0	0	0	0	0	0	0	0
('696', '_', 'AY618223|Ceratobasidium_sp_olrim768|Fungi; _Basidiomycota; _Agaricomycotina; _Agaricomycetes; _Incertae_sedis; _Cantharellales; _Ceratobasidiaceae; _Ceratobasidium|-|-')	0	0	0	0	0	0	0	0	0	0	0	0	0	0	0	0	0	0	0	1	0	0	0	0	0	0	0	0	0	0	0	0	0	0	0	0	0	0	0	0	0	0	0	0	0	0	0	0	0
('699', '_', 'GQ159913|Cortinarius_fasciatus||Cortinarius|Fungi; _Basidiomycota; _Agaricomycotina; _Agaricomycetes; _Agaricomycetidae; _Agaricales; _Cortinariaceae; _Cortinarius')	0	0	0	0	0	0	0	0	0	0	0	0	0	0	0	0	0	0	0	0	0	0	0	0	0	0	0	0	0	0	0	0	0	0	0	0	3	0	0	0	0	0	0	0	0	0	0	0	0
('700', '_', 'JF747073|Exophiala_castellanii|Fungi; _Ascomycota; _Pezizomycotina; _Eurotiomycetes; _Chaetothyriomycetidae; _Chaetothyriales; _Herpotrichiellaceae; _Exophiala|-|-')	0	0	0	0	0	0	0	0	0	0	0	0	0	0	0	0	0	0	0	0	0	0	0	0	0	0	0	0	0	0	0	0	0	0	0	0	0	0	0	0	1	0	0	0	0	0	0	0	1
('701', '_', 'EF546653|Nematoctonus_pachysporus|Fungi; _Basidiomycota; _Agaricomycotina; _Agaricomycetes; _Agaricomycetidae; _Agaricales; _Pleurotaceae; _Nematoctonus|-|-')	0	0	0	0	0	0	0	0	0	0	0	0	0	0	0	0	0	0	0	0	0	0	0	0	0	0	0	0	0	0	0	0	0	0	0	0	0	0	0	0	0	0	0	0	0	0	0	0	0
('71', '_', 'HQ604361|Inocybe_flocculosa_var_flocculosa|Fungi; _Basidiomycota; _Agaricomycotina; _Agaricomycetes; _Agaricomycetidae; _Agaricales; _Cortinariaceae; _Inocybe|-|-')	25	0	0	0	0	0	0	0	0	0	0	0	0	0	0	0	0	0	0	0	0	0	0	0	0	0	0	0	0	0	0	0	0	0	0	0	0	0	0	0	0	0	0	0	0	0	0	0	0
('722', '_', 'AY378154|Acremonium_furcatum|Fungi; _Ascomycota; _Pezizomycotina; _Sordariomycetes; _Hypocreomycetidae; _Microascales; _Microascaceae|-|-')	0	0	0	0	0	0	0	0	0	0	0	0	0	0	0	0	0	0	0	0	0	0	0	0	0	0	0	0	0	0	0	0	0	0	0	0	0	0	0	0	0	0	0	0	0	0	0	0	1
('728', '_', 'EF029235|Pseudaegerita_viridis|Fungi; _Ascomycota; _Pezizomycotina; _Leotiomycetes; _Leotiomycetidae; _Helotiales; _Hyaloscyphaceae; _Pseudaegerita|-|-')	0	0	0	0	0	0	0	0	0	0	0	0	0	0	0	0	0	0	0	0	0	0	0	3	0	0	0	0	0	0	0	0	0	0	0	0	0	0	0	0	0	0	0	0	0	0	0	0	0
('730', '_', 'AB056138|Nadsonia_fulvescens_var_fulvescens|Fungi; _Ascomycota; _Saccharomycotina; _Saccharomycetes; _Saccharomycetidae; _Saccharomycetales; _Incertae_sedis; _Nadsonia|-|-')	0	0	0	0	0	0	0	0	0	0	0	0	0	0	0	0	0	0	0	0	0	0	0	0	0	0	0	0	0	0	0	0	0	1	0	0	0	0	0	0	0	0	0	0	0	0	0	0	0
('737', '_', 'AY805603|ascomycete_sp_olrim543|Fungi; _Ascomycota|-|-')	1	6	0	0	0	0	0	0	0	0	0	0	0	0	0	0	0	0	0	0	0	0	0	0	0	0	0	0	0	0	0	32	0	0	0	0	0	0	0	0	0	0	0	5	0	0	0	0	0
('74', '_', 'HQ667543|Scolecobasidium_excentricum|Fungi; _Ascomycota; _Pezizomycotina; _Incertae_sedis; _Incertae_sedis; _Incertae_sedis; _Incertae_sedis; _Scolecobasidium|-|-')	0	2	0	0	0	0	0	0	0	0	0	0	0	0	0	0	0	0	0	0	0	0	0	0	0	0	0	0	0	0	0	0	0	0	0	0	0	0	0	0	0	0	0	0	0	0	0	0	0
('740', '_', 'GU973777|Dokmaia_sp_ASR_227|Fungi; _Ascomycota; _Pezizomycotina; _Incertae_sedis; _Incertae_sedis; _Incertae_sedis; _Incertae_sedis; _Dokmaia|-|-')	0	0	0	0	0	0	0	0	0	0	0	0	0	0	0	0	0	0	0	0	0	0	0	0	0	0	0	0	0	0	0	0	0	0	0	0	0	0	0	0	0	0	0	0	0	0	0	0	0
('741', '_', 'UC1860730|Tricholoma_flavovirens|voucher|-|-')	0	0	0	0	0	0	0	0	0	0	0	0	0	0	0	0	0	1	0	0	0	0	0	0	0	0	0	0	0	0	0	0	0	0	0	0	0	0	0	0	0	0	0	0	0	0	0	0	0
('742', '_', 'JN400822|Filobasidium_globisporum|Fungi; _Basidiomycota; _Agaricomycotina; _Tremellomycetes; _Incertae_sedis; _Filobasidiales; _Filobasidiaceae; _Filobasidium|-|-')	0	0	0	0	0	0	0	0	0	0	0	0	0	0	0	0	0	0	0	0	0	0	0	0	0	0	0	0	0	0	0	0	0	0	0	0	0	0	0	0	0	0	0	0	0	0	0	0	0
('743', '_', 'HM036609|Penicillium_sp_KRP56|Fungi; _Ascomycota; _Pezizomycotina; _Eurotiomycetes; _Eurotiomycetidae; _Eurotiales; _Trichocomaceae; _Penicillium|-|-')	0	0	0	0	0	0	2	0	0	0	0	0	0	0	0	0	0	0	0	0	0	0	0	0	0	0	0	0	0	0	0	0	0	0	0	0	0	0	0	0	0	0	0	0	0	0	0	0	0
('745', '_', 'AM084537|ascomycete_sp_HK_S263|Fungi; _Ascomycota|-|-')	0	0	0	0	0	0	0	0	0	0	0	0	0	0	0	0	0	0	0	0	0	0	0	0	0	0	0	0	0	0	0	0	0	0	0	0	0	0	0	0	0	0	0	0	0	0	0	0	0
('75', '_', 'U58638|Lachnum_controversum|Fungi; _Ascomycota; _Pezizomycotina; _Leotiomycetes; _Leotiomycetidae; _Helotiales; _Hyaloscyphaceae; _Lachnum; _Lachnum_controversum|-|-')	0	0	0	0	0	0	1	0	0	0	0	0	0	0	0	0	0	0	0	0	0	0	0	0	0	0	0	0	0	0	0	25	0	0	0	0	0	0	0	0	0	0	0	0	0	0	0	0	0
('758', '_', 'FJ436329|Inocybe_cinnamomea|Fungi; _Basidiomycota; _Agaricomycotina; _Agaricomycetes; _Agaricomycetidae; _Agaricales; _Cortinariaceae; _Inocybe|-|-')	0	0	0	0	0	0	0	0	0	0	0	0	0	0	104	0	0	0	0	0	0	0	0	0	0	29	0	0	0	0	0	0	0	0	0	0	0	0	66	0	0	0	0	0	0	0	0	0	0
('76', '_', 'AY372288|cf_Xerocomus_sp_GD_2003(SWA4)|Fungi; _Basidiomycota; _Agaricomycotina; _Agaricomycetes; _Agaricomycetidae; _Boletales; _Boletaceae|-|-')	0	0	0	0	0	0	0	0	0	0	0	0	0	0	0	0	0	0	0	0	0	0	0	0	0	0	0	0	0	0	0	0	0	0	0	0	0	0	0	0	0	0	0	0	0	0	0	17	0
('760', '_', 'JF792849|Zalerion_sp_DVM|Fungi; _Ascomycota; _Pezizomycotina; _Sordariomycetes; _Spathulosporomycetidae; _Lulworthiales; _Lulworthiaceae; _Zalerion|-|-')	0	0	0	3	0	0	0	0	0	0	0	0	0	0	0	0	0	0	0	0	1	0	0	0	0	0	0	0	0	0	20	0	0	0	0	0	0	0	2	0	0	0	0	0	0	0	0	0	0
('761', '_', 'EU755005|Mortierellaceae_sp_SN_2008|Fungi; _Zygomycota; _Mucoromycotina; _Incertae_sedis; _Incertae_sedis; _Mortierellales; _Mortierellaceae|-|-')	16	18	9	15	9	117	4	1	0	41	0	81	0	0	1	0	3	11	1	58	54	29	46	0	11	4	5	46	7	17	24	46	2	0	83	129	12	42	1	1	47	25	7	1	20	0	78	15	0
('762', '_', 'AY052488|Cryptococcus_aquaticus|Fungi; _Basidiomycota; _Agaricomycotina; _Tremellomycetes; _Incertae_sedis; _Filobasidiales; _Filobasidiaceae; _Cryptococcus|-|-')	0	0	0	0	0	0	0	0	0	0	0	0	0	0	0	0	0	0	0	0	4	0	0	0	0	0	0	0	0	1	0	0	1	0	0	0	0	0	0	0	0	0	0	0	0	0	0	0	0
('765', '_', 'UC1859714|Rhizopogon_salebrosus|voucher|-|-')	0	0	0	0	0	0	0	0	0	0	0	0	0	2	0	0	0	0	0	1	0	0	5	0	0	0	0	0	0	0	0	0	0	0	0	0	1	0	0	0	0	1	0	0	0	11	0	0	0
('770', '_', 'UDB001616|-|-|Pseudotomentella_atrofusca|Fungi; _Basidiomycota; _Agaricomycotina; _Agaricomycetes; _Incertae_sedis; _Thelephorales; _Thelephoraceae; _Pseudotomentella; _Pseudotomentella_atrofusca')	0	0	0	0	0	0	0	0	35	28	0	0	0	0	0	0	0	0	19	0	1	43	0	0	24	0	77	0	0	0	0	5	0	0	0	0	41	0	0	0	0	56	1	127	11	0	0	0	0
('779', '_', 'DQ987907|Tubaria_segestria|Fungi; _Basidiomycota; _Agaricomycotina; _Agaricomycetes; _Agaricomycetidae; _Agaricales; _Cortinariaceae; _Tubaria|-|-')	0	0	0	0	0	0	0	0	0	0	0	1	0	0	0	0	0	0	0	0	0	0	0	0	0	0	0	0	0	0	0	0	0	0	0	0	0	0	0	0	0	0	0	0	0	0	0	0	0
('78', '_', 'UC1860102|Inocybe_grammata|voucher|-|-')	0	0	0	0	0	0	0	0	0	0	0	0	0	0	0	0	0	0	0	0	0	0	0	0	0	0	0	0	0	0	0	0	0	0	0	0	0	0	0	0	0	0	0	0	0	0	0	0	1
('800', '_', 'AY618670|Stereum_sanguinolentum|Fungi; _Basidiomycota; _Agaricomycotina; _Agaricomycetes; _Incertae_sedis; _Russulales; _Stereaceae; _Stereum; _Stereum_sanguinolentum|-|-')	0	0	0	0	0	0	0	0	0	0	0	0	0	0	0	0	0	0	0	0	0	0	0	0	0	0	0	1	0	0	0	0	0	0	0	0	0	0	0	0	0	0	0	0	0	0	0	0	0
('802', '_', 'AJ878782|Mortierella_macrocystis|Fungi; _Zygomycota; _Mucoromycotina; _Incertae_sedis; _Incertae_sedis; _Mortierellales; _Mortierellaceae; _Mortierella|-|-')	0	0	0	0	0	0	0	0	0	0	0	0	0	0	0	0	0	0	0	0	0	0	0	0	0	0	0	0	0	0	0	0	0	0	0	0	0	0	0	0	0	0	0	0	0	0	0	0	0
('821', '_', 'UDB000953|-|-|Tomentella_lilacinogrisea|Fungi; _Basidiomycota; _Agaricomycotina; _Agaricomycetes; _Incertae_sedis; _Thelephorales; _Thelephoraceae; _Tomentella; _Tomentella_lilacinogrisea')	0	0	0	0	0	0	0	0	0	0	0	0	0	0	0	0	0	0	0	0	0	0	0	0	0	0	0	0	0	0	0	0	0	0	0	0	0	0	0	0	0	0	0	0	0	0	0	0	0
('828', '_', 'HQ898670|Rhizoctonia_solani||-|-')	0	0	1	0	0	0	0	0	0	0	0	0	0	0	0	0	0	0	0	0	0	0	0	0	0	0	0	0	0	0	0	0	0	0	0	0	0	0	0	0	0	0	0	0	0	0	0	0	0
('833', '_', 'AY271809|Calcarisporium_arbuscula|Fungi; _Ascomycota; _Pezizomycotina; _Sordariomycetes; _Hypocreomycetidae; _Hypocreales; _Incertae_sedis; _Calcarisporium; _Calcarisporium_arbuscula|-|-')	0	0	0	0	0	0	0	0	0	0	1	0	0	0	0	0	0	0	0	0	0	0	0	0	0	0	0	0	0	0	0	0	0	0	0	0	0	0	0	0	0	0	0	0	0	0	0	0	0
('839', '_', 'DQ317350|Thelebolaceae_sp_BC17|Fungi; _Ascomycota; _Pezizomycotina; _Leotiomycetes; _Leotiomycetidae; _Thelebolales; _Thelebolaceae|-|-')	0	0	0	0	0	0	0	0	0	0	0	0	0	0	0	0	1	0	0	0	0	0	0	0	0	0	0	0	0	0	0	0	0	0	0	0	0	0	0	0	0	0	0	0	0	0	0	0	0
('84', '_', 'GU062291|Ascomycota_sp_I306|Fungi; _Ascomycota|-|-')	0	1	0	0	0	0	0	0	1	1	0	2	0	3	0	0	1	0	2	0	0	0	1	0	1	0	0	1	0	0	0	0	0	0	0	0	0	0	1	0	0	0	0	0	0	2	0	0	1
('844', '_', 'GU062217|Lecythophora_sp_I95|Fungi; _Ascomycota; _Pezizomycotina; _Sordariomycetes; _Sordariomycetidae; _Coniochaetales; _Coniochaetaceae; _Lecythophora|-|-')	0	0	0	0	0	0	0	0	0	0	0	0	0	0	0	0	0	0	0	1	0	0	0	0	0	0	0	0	0	0	0	0	0	0	0	0	0	0	0	0	0	0	0	0	0	0	0	0	0
('85', '_', 'AJ301970|Glomerella_lagenaria||-|-')	0	0	0	0	0	2	2	0	0	1	0	0	2	0	0	0	2	0	1	0	0	0	0	0	0	0	0	0	0	0	0	2	5	1	0	1	0	0	0	0	0	0	0	0	0	0	0	0	0
('854', '_', 'AF444317|Cryptococcus_macerans|Fungi; _Basidiomycota; _Agaricomycotina; _Tremellomycetes; _Incertae_sedis; _Filobasidiales; _Filobasidiaceae; _Cryptococcus|Cystofilobasidium|Fungi; _Basidiomycota; _Agaricomycotina; _Tremellomycetes; _Incertae_sedis; _Cystofilobasidiales; _Cystofilobasidiaceae; _Cystofilobasidium')	0	0	0	0	0	0	0	0	0	0	0	0	0	0	0	0	0	0	0	0	0	0	0	0	0	0	0	0	0	0	0	0	0	0	0	0	0	0	0	0	0	0	0	0	0	0	0	0	0
('857', '_', 'AB193540|Umbelopsis_ramanniana|Fungi; _Zygomycota; _Mucoromycotina; _Incertae_sedis; _Incertae_sedis; _Mucorales; _Umbelopsidaceae; _Umbelopsis; _Umbelopsis_ramanniana|-|-')	0	0	0	0	0	0	0	0	0	0	0	0	0	0	0	0	0	0	0	0	0	0	0	0	0	0	0	0	0	0	0	0	0	0	0	0	0	0	0	0	0	0	0	0	0	0	0	0	0
('862', '_', 'AY509555|Exidia_glandulosa|Fungi; _Basidiomycota; _Agaricomycotina; _Tremellomycetes; _Incertae_sedis; _Tremellales; _Exidiaceae; _Exidia; _Exidia_glandulosa|-|-')	0	0	0	0	0	0	0	0	0	0	0	0	0	0	0	0	0	0	0	0	0	0	0	0	0	0	0	0	0	0	0	0	0	0	0	0	0	0	0	0	0	0	0	0	0	0	0	0	0
('869', '_', 'DQ516081|Pochonia_sp_CBS_64685|Fungi; _Ascomycota; _Pezizomycotina; _Sordariomycetes; _Hypocreomycetidae; _Hypocreales; _Clavicipitaceae; _Pochonia|-|-')	0	0	0	0	0	0	0	0	1	0	0	0	0	0	0	0	0	0	0	0	0	0	0	0	1	0	0	0	0	0	0	0	0	0	0	0	0	0	0	0	0	0	0	0	0	0	0	0	0
('874', '_', 'HQ914933|Chrysosporium_lobatum|Fungi; _Ascomycota; _Pezizomycotina; _Eurotiomycetes; _Eurotiomycetidae; _Onygenales; _Onygenaceae; _Chrysosporium|-|-')	0	0	0	0	0	0	0	0	0	0	0	0	0	0	0	0	0	0	0	0	0	0	0	0	0	0	0	0	0	0	0	0	0	0	0	0	0	0	0	0	0	0	0	0	0	0	0	0	1
('875', '_', 'EU273515|Mariannaea_elegans|Fungi; _Ascomycota; _Pezizomycotina; _Sordariomycetes; _Hypocreomycetidae; _Hypocreales; _Nectriaceae; _Mariannaea; _Mariannaea_elegans|-|-')	0	0	0	0	0	0	0	0	0	0	0	0	0	0	0	0	0	0	0	0	0	0	0	0	0	0	0	0	0	0	0	0	0	0	0	0	0	0	0	0	0	0	0	0	0	0	0	0	0
('876', '_', 'FJ861414|Mucorales_sp_3T21AC|Fungi; _Zygomycota; _Mucoromycotina; _Incertae_sedis; _Incertae_sedis; _Mucorales|-|-')	0	0	0	0	0	0	0	0	0	0	0	0	0	0	0	0	0	0	0	0	0	0	0	0	0	0	0	0	0	0	0	0	0	0	0	0	0	0	0	0	0	0	0	0	0	0	0	0	0
('877', '_', 'DQ445890|Phomopsis_sp_2002_117/3|Fungi; _Ascomycota; _Pezizomycotina; _Sordariomycetes; _Sordariomycetidae; _Diaporthales; _Valsaceae; _Phomopsis|-|-')	0	0	0	0	0	0	0	0	0	0	0	0	0	0	0	0	0	0	0	0	0	0	0	0	0	0	0	0	0	0	0	0	0	0	0	0	0	0	0	0	0	0	0	0	0	0	0	0	0
('880', '_', 'HM992819|Veronaea_sp_E6917h|Fungi; _Ascomycota; _Pezizomycotina; _Incertae_sedis; _Incertae_sedis; _Incertae_sedis; _Incertae_sedis; _Veronaea|-|-')	0	0	0	0	0	0	0	0	0	0	0	0	0	0	0	0	0	0	0	0	0	0	0	0	0	0	0	0	0	1	0	0	0	0	0	0	0	0	0	0	0	0	0	0	0	0	0	0	0
('885', '_', 'FN386273|Phomopsis_sp_3803|Fungi; _Ascomycota; _Pezizomycotina; _Sordariomycetes; _Sordariomycetidae; _Diaporthales; _Valsaceae; _Phomopsis|-|-')	0	0	0	0	0	0	0	0	0	0	0	1	0	0	0	0	0	0	0	0	0	0	0	0	0	0	0	0	0	0	0	0	0	0	0	0	0	0	0	0	0	0	0	0	0	0	0	0	0
('887', '_', 'AB199600|Umbelopsis_isabellina|Fungi; _Zygomycota; _Mucoromycotina; _Incertae_sedis; _Incertae_sedis; _Mucorales; _Umbelopsidaceae; _Umbelopsis; _Umbelopsis_isabellina|-|-')	0	0	0	0	0	0	0	0	0	0	0	0	0	0	0	0	0	0	0	0	0	0	0	0	0	0	0	0	0	0	0	0	0	0	0	0	0	0	0	0	0	0	0	0	0	0	0	0	0
('904', '_', 'GQ159913|Cortinarius_fasciatus||Cortinarius|Fungi; _Basidiomycota; _Agaricomycotina; _Agaricomycetes; _Agaricomycetidae; _Agaricales; _Cortinariaceae; _Cortinarius')	0	0	0	0	0	0	0	0	0	0	0	0	0	0	0	0	0	0	0	0	0	0	0	0	0	1	0	0	0	0	0	0	0	0	0	0	0	0	0	0	0	0	0	0	0	0	0	0	0
('909', '_', 'HQ649990|Hypocreales_sp_s011|Fungi; _Ascomycota; _Pezizomycotina; _Sordariomycetes; _Hypocreomycetidae; _Hypocreales|-|-')	0	0	0	0	0	0	0	0	0	0	0	1	0	0	0	0	0	0	0	0	0	0	0	0	0	0	0	0	0	0	0	0	0	0	0	0	0	0	0	0	0	0	0	0	0	0	0	0	0
('922', '_', 'DQ485617|Rhizophydium_sp_JEL_223|Fungi; _Chytridiomycota; _Incertae_sedis; _Chytridiomycetes; _Incertae_sedis; _Rhizophydiales; _Rhizophydiaceae; _Rhizophydium|-|-')	0	0	0	0	0	0	0	0	0	0	0	1	0	0	0	0	0	0	0	0	0	0	0	0	0	0	0	0	0	0	0	0	0	0	0	0	0	0	0	0	0	0	0	0	0	0	0	0	0
('94', '_', 'GU212388|Cadophora_sp_E_7R3_1_8|Fungi; _Ascomycota; _Pezizomycotina; _Leotiomycetes; _Leotiomycetidae; _Helotiales; _Incertae_sedis; _Cadophora|-|-')	0	0	0	0	0	0	0	0	0	0	0	0	0	0	0	0	0	0	0	0	0	0	0	0	0	0	0	0	0	0	0	0	0	0	0	0	0	0	0	0	0	0	0	0	0	0	0	0	0
('944', '_', 'EU860076|Fusarium_sp_F_267,620|Fungi; _Ascomycota; _Pezizomycotina; _Sordariomycetes; _Hypocreomycetidae; _Hypocreales; _Nectriaceae; _Fusarium|-|-')	0	0	0	0	0	0	0	0	0	0	0	0	0	0	0	0	0	0	0	0	0	0	0	0	0	0	0	0	0	0	0	0	0	0	0	0	0	0	0	0	0	0	0	0	0	0	0	0	0
('945', '_', 'GU570541|Microcyclospora_tardicrescens|Fungi; _Ascomycota; _Incertae_sedis; _Incertae_sedis; _Incertae_sedis; _Incertae_sedis; _Incertae_sedis; _Microcyclospora|-|-')	0	0	0	0	0	0	0	0	0	0	0	0	0	0	0	0	0	0	0	0	0	0	0	0	0	0	0	0	0	0	0	0	0	0	0	0	0	0	0	1	0	0	0	0	0	0	0	0	0
('947', '_', 'AB038128|Rhodotorula_acheniorum|Fungi; _Basidiomycota; _Pucciniomycotina; _Microbotryomycetes; _Incertae_sedis; _Sporidiobolales; _Incertae_sedis; _Rhodotorula|-|-')	0	0	0	0	0	0	0	0	0	0	0	0	0	0	0	0	0	0	0	0	0	0	0	0	0	1	0	0	0	0	0	0	0	0	0	0	0	0	0	0	0	0	0	0	0	0	0	0	0
('952', '_', 'GU570527|Devriesia_pseudoamericana|Fungi; _Ascomycota; _Pezizomycotina; _Dothideomycetes; _Dothideomycetidae; _Capnodiales; _Teratosphaeriaceae; _Devriesia|-|-')	0	0	0	0	0	0	0	0	0	0	0	0	0	0	0	0	0	0	0	0	0	0	0	0	0	0	0	0	0	0	0	0	0	0	0	0	0	0	0	0	0	0	0	0	0	0	0	1	0
('959', '_', 'AY618675|homobasidiomycete_sp_WRCF_B9|Fungi; _Basidiomycota; _Agaricomycotina; _Agaricomycetes|-|-')	0	0	0	0	0	0	0	0	0	0	0	0	2	0	0	0	0	0	0	0	0	0	0	0	0	0	0	0	0	0	0	0	0	0	0	0	0	0	0	0	0	0	0	0	0	0	0	0	0
('960', '_', 'DQ682563|Arthopyreniaceae_sp_IBL_03137|Fungi; _Ascomycota; _Pezizomycotina; _Dothideomycetes; _Pleosporomycetidae; _Pleosporales; _Arthopyreniaceae|-|-')	0	0	0	0	0	0	0	0	0	0	0	0	1	0	0	0	0	0	0	0	0	0	0	0	0	0	0	0	0	0	0	0	0	0	0	0	0	0	0	0	0	0	0	0	0	0	0	0	0
('962', '_', 'AY261368|Beauveria_felina|Fungi; _Ascomycota; _Pezizomycotina; _Sordariomycetes; _Hypocreomycetidae; _Hypocreales; _Clavicipitaceae; _Beauveria; _Beauveria_felina|-|-')	0	0	0	0	0	0	0	0	0	0	0	0	0	0	0	0	0	0	0	0	0	0	0	0	0	0	0	0	0	0	0	0	0	0	0	0	0	0	0	0	0	0	0	0	0	0	0	0	0
('969', '_', 'FM172867|Calluna_vulgaris_root_associated_fungus|Fungi|-|-')	0	0	0	0	0	0	1	0	0	0	0	0	0	0	0	0	0	0	0	0	0	0	0	0	0	0	0	0	0	0	0	0	0	0	0	0	0	0	0	0	0	0	0	0	0	0	0	0	0
('97', '_', 'DQ019384|Septoria_canadensis|Fungi; _Ascomycota; _Pezizomycotina; _Dothideomycetes; _Dothideomycetidae; _Capnodiales; _Mycosphaerellaceae; _Septoria|-|-')	0	1	0	1	0	0	0	0	0	1	0	0	0	0	1	0	12	0	0	0	0	0	0	0	1	0	1	1	1	1	2	1	0	0	0	1	0	0	1	1	0	0	0	0	0	0	0	0	0
('978', '_', 'EU678414|Leohumicola_levissima|Fungi; _Ascomycota; _Pezizomycotina; _Leotiomycetes; _Incertae_sedis; _Incertae_sedis; _Incertae_sedis; _Leohumicola|Helotiales|Fungi; _Ascomycota; _Pezizomycotina; _Leotiomycetes; _Leotiomycetidae; _Helotiales')	0	0	0	0	0	0	0	0	0	0	0	0	0	0	0	0	0	0	0	0	0	0	0	0	0	0	0	0	0	0	0	0	0	0	0	0	0	0	0	0	0	0	0	0	0	0	0	0	0
('985', '_', 'AM269769|Ganoderma_sp_SP16|Fungi; _Basidiomycota; _Agaricomycotina; _Agaricomycetes; _Incertae_sedis; _Polyporales; _Ganodermataceae; _Ganoderma|-|-')	0	0	0	0	0	0	0	0	0	0	0	0	0	0	0	0	0	0	0	0	0	0	0	0	0	0	0	0	0	0	0	0	0	0	0	0	0	0	0	0	0	0	0	0	1	0	1	0	0
('99', '_', 'AF252839|ericoid_endophyte_sp_GU35|Fungi; _Ascomycota; _Pezizomycotina; _Leotiomycetes; _Leotiomycetidae; _Helotiales|-|-')	0	0	0	0	0	0	0	0	0	0	0	0	1	1	0	0	0	0	0	0	0	0	0	0	1	0	0	1	0	0	0	0	0	2	0	1	0	0	0	0	0	2	0	0	0	0	0	0	0
('990', '_', 'EU715669|Nectria_sp_SGLMf04|Fungi; _Ascomycota; _Pezizomycotina; _Sordariomycetes; _Hypocreomycetidae; _Hypocreales; _Nectriaceae; _Nectria|-|-')	0	0	0	0	0	0	0	0	0	0	0	0	0	0	0	0	0	0	0	0	0	0	1	0	0	0	0	0	0	0	0	0	0	0	0	0	0	0	0	0	0	0	0	0	1	0	0	0	0
[truncated: 33 more columns]
