# Supplementary material for: Fungi at a Small Scale: Spatial Zonation of Fungal Assemblages around Single Trees
Source: PLoS One. 2013 Oct 16;8(10):e78295. doi: 10.1371/journal.pone.0078295 (PMC3797779; doi:10.1371/journal.pone.0078295)
Supplement: Table S2 — Representative sequences for all fungal OTUs. (XLSX) [file pone.0078295.s004.xlsx]

## Sheet: TableS2.txt
Table S2 - Representative sequences for all fungal OTUs
>0 a5i_227
TTCAAAACAGCGGACTTCGGTCCTTGCTGCACCCTTGTCTTTTGCGTACCGTATGTTTCCTCGGCGGGCTTGCCTGCCGGTTGGACAATATCAAACCTTTTTGTAGTTGCAATCAGCGTCAGAAAACAAATAATAATTA
>1 a4b_2947
CCGAATTGTCAACAAGGGTTGTTGCTGGTCCTCGAACAGGGGGACATGTGCACGCTCTGTTCACACATCCACTCACACCATGTGCACCCTCTGTAGTTCTATGGTCGGGGGGCCTGTCCTCCTGCTGTGGTTCTGCTTCTTTACACACACACCGTAACAAAGTCTCATGGAATGCATGCCGCGTTTAACGCAATACAATA
>10 a2igrp_803
CAGAGAACATCGCCCTCACGGGTGACTCTCCAACCCTATGTTATTGTACCTTTGTTGCTTTGGCGAGCCGCTTCGGCCACCGGCTTCTGCTGGTGTGTGCTCGCCAGAGGACCCCAAACTCTGAATATTAATGTCGTCTGAGTACTATATAATAGTTA
>100 a2ogrp_14118
CTATAACCCACGGGGGTGGGCTTTCCGAAAGGACAGTCATGGGCGCCTCACACGGCGTTCCCTGGCTGGCGGCGGCGGTGCCTGTGGTGTTGCGGGGGTTACCCTCCACAACACGCTTGCCTGTACGTCGATCGAGCCCATCGCCTGAATATTACCCTTGCTTTTTGCGCACCCATTGTTTCCTCGGCAGGCTTGCCTGCCAGTAGGACCTTTTCAACTCTTTGCAGTTGCAGTCAGCGTCAGAAATTAACATAATCGTTA
>1000 a7ogrp_3567
ACAAATCAATACACACGATCTCTTGGCGTCAGCCTCGAGACTCGACACACGATACATGTTGACGAACATTTGAGACAATCAATTAAAA
>1001 a13ogrp_8780
TGAATGTACTCGATGTATTTCACACTTGAACCACTCTCGCATACGAAGGGTCTCGGCTTGCCGAGACACGCCGTATCGAGAGTAAAAGTCAAACCACAAACATTTAACATTTATAAATTATTTTACATGAG
>1002 a19ogrp_9549
GCGAAGTTCGGAATGCGTGTCCGCTGTTGACGCTGCCCAGCAATGGGATGTGCTCGCTCGGATGTGTGTCCCTTCACTATCCCACCCCATTGTGAACCAAGTGTGTGAGCCGAAGAGAGATCGGAGGCTCGCATGCAACCCTTAACATACCCCAATGAAGTATCAGAATGTACCTTGCGTTAACTCGCACAAATA
>1003 a2igrp_26850
ACAAGTCCTGCTGTGCGTGCGGAGCAATCTGCATGCGCACATCCGTTCCATGTGCACCCGCACATGACATTTCTGCGAATCGTCTGATTGTCGCTCTCCAAATCATAC
>1004 a14igrp_11718
CCGAGTGTAAAAACTCCCAAACCCCTGAGAACTTACTCTGTTGCTTCGGCGGCGTGGCCTAACATCCCGCCGCCGGAGACCCCAAACTCCTGTATTCACAGTGTATTCTGAGTGGCATAAGCAAATAAATCA
>1005 a2j_7178
CTGAATGGCCTCTGGGCCTTCAACCTTGCAAACCTGTGGAAGCAACATGTGCTTCGGCGCTTCGGCGTCGCCTTTATGCTGCAATAAGCCTATGTGTCTGAATCAAATACAAGAAATA
>1006 a5a_9164
AAGTTGTAATAAGGTTTCCATTAGTGAACCTGCAGAAGGATCATTATGAGAGGAACGCTGCAAGACATACAACAACACTGTGTTTCTGAGCAATGAGTGCAGCGTAGCGCATGCCTGCTATACATGTCTATTGACACACCATGCAGACTGAATCAACTCAATAGTAAGCAACCAATAAACA
>1007 a9ogrp_4801
CTATACGCCCTCACGGGCCATGAGTCACCAACGATTCCCGTGCGTTTTCCGTTCTGGCGAGCGTTCCGGGAATCATATCAACTAAATTTTAGAAATCCTGTAAATAAATATTA
>1008 a5i_1034
ACAAATCGTGTCTTCTGTGCTGCCCTCTTTGGAAGGCGGCCAGGCTGACATTAATCCCGGGAGCGATCCCGGTCGATATATTTACGAGAAGTGAGAACGTGGGCAAAGCATAC
>1009 a14ogrp_3960
CAAAATCTGTTGGGTGGTAAGGGGGGAATTGGTGTAATAACCGATTCTCAACTCTACCCCTTTTACATTTGCGCTTGTATTGTTTGACAGAGTAAATCTACCCATAATTATGA
>101 a4ogrp_3927
CCGAGTGCGGGCGCCCCGGCGCCCGACCTCCCAACCCTTTGATTATTCAAGACCTCCTTCTGCCTCGGGGGTGACCCGGACCTCGCGCCCGCGGTCCCCCCGGTGGTACAACCAAACCCTGCATCAATTGTCGTCTGAGCGGAAAGCAAATATAAACA
>1010 a20ogrp_26411
GTGATTTGGCCTCGCGGCCTAAAGATCTATCATCTTTCACCTCTGTGAACCGTTCTGGTCTCCGGACTTGATTACAAACAATAGTGTAATGAATGTGAAACAAAACATAATCTAATA
>1011 a14ogrp_20015
TGAATGTACTAGATGCATACTTGAACCACTCTCGCATACGAAGAGGCTCGGCTTGCCGAGACACGCCGTATCGAGAGTAAAAGTCAAACAAACCCTTTAACATTTATAAATTATTTTACATGAG
>1012 a2igrp_18652
TCGAAGAGCAACTCTTCATATACACCTGTGAACCGTCGTCCCTTGGGACGCTATACAAACTCTAGTGTTGTCTTGTATGTCTAGTTATATCATAACAAAAA
>1013 a4a_25343
GTGAATTTTAGGGTGCTCTTCTCCTTCTTAACAAAGGGAAGAGGCCTGACCTCCACTCTCCAACACTGTGCACTTATCGGCATTAGGATTTCAAGCTAGAGAAGACGCAAGTCCGATCTTGTAG
>1014 a2j_499
GTGATTGGCCTCTGGCCTGATTCATAATCCTGACACCTCTGTGAACTGTTGGCCCTCGGGCCGTTTTCGATAACAAACTTTTGTGTGATTGAACGTGAATGTATCTTAACAACGACA
>1015 a4d_8886
GAGAGAAACTGCCCTCTGGGTACATCTCCCGCCCTGATTATTTTACCTCGTTGCTTTGGTAGGCATATTTGCCTGCCAAAGTGTATCAATACTCTAGTACTATCTTGTCTGAGCAAAAAATAATACTTTA
>1016 a4d_12940
CAGAGTTCATGCCCGAAAGGGTAGACCTCCCACCCTTGTGTATTATTACTTTGTTGCTTTGGCGAGCTGCCTTCGGGCCTTGTATGCTCGCCAGAGAATACCAAAACTCTTTTTATTAATGTCGTCTGAGTACTATATAATAGTTA
>1017 a2l_549
CTGTTTCTTATTTTACGTTTGTGAACCTGATTCCTTTGTGTTCGTGCTTTGCATGTTTTTGATGCATAGGAATCGCCATTTACTTTTTATCTCAATATGCCTAAAACATTTTAATCAAAAAA
>1018 a13igrp_9561
CAAGAGAAAATGGCATTATTCTCCCTTTTCTTCTTTAACCTCTGGTTGGGCAAGCCCAACCACCAGACTAAAAGAAAAAAGACAACAATCATACATTCACATTTACAACATTGGTTAACAGTAGT
>1019 a8c_5649
CAGTGTTAGGCTTCGGCCTCATTCACACCCCTTGTTGAACCTCTGGTTTCTTTGGCGATGTCATGGACTCGTCAAACTTTAAACTCTGAAAATGCGATACTGTCCGAGTGAGATTGAATTATCA
>102 a2ogrp_23690
ACGAATTCATTAGGAGTTGTGCTGGTTCTTACAAGTGCACACTCCTTACAATTCCATTCACCCCTTGTGCACTCTAAGAGACGTATCTCCCCCGTTTACGCGCCTTTATTGGCTCGGGATTTCGTCTGTTTAACACACTCTTATTGTAATAGAATGTAATCTGGCTGAAAGGCCTAAAATTTAAATA
>1020 a4a_2184
TTGAAGACTAAGAGCGCACTTCATTGTGGCTCGCCCTTCATATCCACATACACCGTGCACTGTAATACCTTTTTTATCAGACCCTACAAGTCAAAGAATGTACTACTTTAATAAAGTAAACA
>1021 a9d_6424
GAGATTGGCCTAACGGCCGTGTCTTCATCCACACACACCGTGAACCGTTTTGGAGCCTCTAGGGGCTTCAGACAAAACACCAAAAACTTTATGTATTGAATGTAAACTATTCGTAACAAAACA
>1022 a1igrp_849
ATGAGTCAGGGTCTCGACTTATACAGAGCCCGACCTCCAACCCTTTGTCTACCTTACCAATGTTGCTTCGGCGAGCCCGCTTCGAAAGAGGCCGCCGGAGGGTCGTTAAACACTCTCTGGTCAGTGCTCGCCGGTGGCCCCAATCAAAACTCTTGTTAAGAACTTGTCTAAGTATAAACAAACAAATAAGTAA
>1023 a20ogrp_10751
AGAATTAGCCGGCAGCCCCGGCGGGGCGACAGTACTTAGAAGTCATACCCCCGGGGCTGGGCGCGCGATCTTCTCACCCTTTGTGAACCACAACCCCGTTGCTTCGGGGGCGACCCCGCCGTTTCGGCGGTGGTGCCCCCGGTGGCCCCATCAAACTCTGCATCTCTCGCGTCGGAGTCTCGAAGAAATTTGAACA
>1024 a1igrp_19629
CAAATCGTTAGTGTGGTTGGTTGGGGTTTGGTCTGTTCTTTGGGTGCAAGCTCTTTGGGGTCTGCTCCTTGAGGTGGGCTCTTTCCTCACACCAACCATCACATATGCACGGCGGAGGTTTCTTGGTGCAAGCCAGGAACGGCCGCTGATGTTTACGCTTGAATGTTTGACAAATCAAATAGGATTAAATTATATA
>1025 a11igrp_23462
ACGAATCATCCCTTCATTACCAACCCATTTGTGAACCGTCGCCTTAGGGCGTTTTTTATAAACACTTGTCTTGAAAAGCATGTCATCGTCGCGCAAGCGATCATAACCAAAATA
>1026 a5j_17362
ACGAGTTAGGGTCCCTCGTGGGCCCGACCTCCCAACCCTTTGTCTACTTGACCATCGTTGCTTCGGCGAGCCCGTCCTCACGGACCGCCGGAGGGACCTTCACAGGCCCTCTGGTCCGCGCTTGTCGGTAGCCCAACCTTTAAAATTCTTAACTAAACGTGTCTTAATCTAAGTACTATTTGTTAAATAAAAGCA
>1027 a20igrp_16241
TCGAGTTAGGGTCTTCTAGGCCCGACCTCCAACCTTTTGTCTACTTAACTTATGTTGCTTCGGCGAGCCCGCTACCTTGAAATATAGGTGGCCGCCGGGGGTTCATACCTCTGGTCCGTGCTCGTCGATAGCCATTATTCAACTCTTGTTTAAAATATGTTGTCTAAGTCACAAACAAAATTAAAGCA
>1028 a7ogrp_10342
GAATAAAATCGTAGCGCCCCGGCGCCGCGTGTATATATATGGGGGGCCGGGTGACGGCCCCCCACCCCACTCTTGTGAAACACCTCTTTGCCTTGGTGGCCGCGGTCCGCTTCGCAGCGTACGGCGTAAGTCCGCCAGCTAAACTCTTCGGAAACCTTTAGTCTGAACAAAATTCATAAAGAATTA
>1029 a11igrp_3655
ACAAATCCAGTGGTTTGGCTTCTGCATTGTGCTTAATAATTGCTGTGACCACAACATGACTATAAATAATTATGTTGCGGCTGCAGTGGATGTTGCACGTGCAGATCCACGCACCATAAGCCCCGCATGCGCAGGCATGTGTGACGCACATTTTATCGTCTGTCTGAACAGTTCAATCTCTAAAC
>103 a8i_14876
TTGAATGAAATCGGAGTCGGTTGTCGCTGGCCTCTTCACCGGGGCATGTGCACGCCTTCTCTGTTCATCCACACACACCTGTGCACTTGTGAGACGGATTAACCCTCTCGGGGGGACGGTCCGTCTATCATACATAAACTCCAATATATAAAATTGAATGTAATCAGATGTAACGCATCTTTAAAC
>1030 a2igrp_11755
AAGAGAAGGGGGTTCGCCCCCGGGGCTCCGGCCCTCCTCTTCACCCGTGTATACCTATCCTCTGTTGCTTTGGTGAGCCTTGGGGTCGTGCCCATGCCGGCGGGTCTCCCGCGGGCGGGTGCCCACCGAAAGCCCCCATTTTCACATTCTGTCTTCTGTAACGTCTGAGTGAAAAACAAATCAAGCA
>1031 a8ogrp_11119
CAGAGTTATCTAACTCCCAACCCATGTGAACTTACCTATGTTGCCTCGGCGGGAGAGCCTACCCGGTACCTACCCTGTAGTTACCCGGGAGCGAGCTACCCTGTAGCCCGCTGCTGGCCGACCCGCCGGTGGACAGTAAAACTCTTGTTTTTTGTGAATTATCTGAGTGTTTATACTTAATAAGTTA
>1032 a1i_22255
TTGAATAAACCTGATGTGGTTGCTGCTGGCTCTCTCGAGAGTATGTGCACGCCCGTCATCTTTATATTTCCACCTGTGCACCTTTTGTAGACCCACAAGGCTTTCGAGTCGAATGGGCCTATGTTTTACCATATACCCCAAGTATGTAACTGAGTGTATCAATGGGCCTTGTGCCTATAAACATTATA
>1033 a3igrp_9312
CTGGGTCTGGGCCTCGTGCCCGCTACCCGTCCTTTGTCATGAGACGCGAAAGCAACTCACATCGCTTCGGCCCCGGGCGATACCCCGCTATTGAGTTAGCGGGCGGACCCCGCGGCCGGCCTTACAAACCCACGCCGAATTTTGAAGTCTGAACAAATGATAAACGAAAAGCA
>1034 a4b_4297
CAAATCAAAGGGAGAGTTGGACGAGTACGAGTGTCGGCGAGAATACCAGATTCTGGTGTCTTTTTGACATTCTGCTTGTCTCTTTCCACATATGCACAGCGTGTCGGGGCCAGTCAAGGCTGGTCCTGCTGCTGATGTTTACGCTTGTTTGTTTGACAAATCTATACATCTAAATAACCA
>1035 a1igrp_5059
CTGAGTTGCAAAACTCCAAACCACTGTGTTCTTTGCTGTTCTGTTGCCTCGGCAGGCCGTCCCAGGGCGGGACCTTTGTCCAGCCTGCCGAAAGCACACCATAAACTCATCTGAACCTGTCTTCTGAAGCACTATTAAATAAGTAA
>1036 a14ogrp_6890
ACGAGTTAGGGTCTCACCGGCCCGATCTCCCAACCCTTTGTCTACTTGACCATCGTTGCTTCGGCGAGCCCGTCCCTCGGGACCGCCGGGGGGATCTTCACCGACCCTCTGGCCCGCGCTCGTCGACAGCCCCCAATTTTAAAACCTTAACTAAACGTGTCTTGAATCTAAGTATTATTGTTAAATAAAACA
>1037 a4ogrp_23402
CCGAGTGAGCGCCTCCGGGCGCGACCTCCAACCCATTGTGATTATACCTCTGTTGCCTCGGGGTGACCCGGCCCCGCCCGGCCCCCGAAGGACGATTAGACCCAACTCTGCATCTTTGCGTCGGATTGAAAAGATTAATTGATGA
>1038 a4j_21539
CCGAGTTAGGGTCTCACCGGCCCGATCTCCCAACCCTTTGTCTACTTGACCATCGTTGCTTCGGCGAGCCCGTCCTCACGGACCGCCGGGGGGTCTTTGTACCCCTTGGCCCGCGCTCGTCGATAGCCCCCCAAATTTAAAAAATCTTAACTAAACGTGTCTTGAATCTAAGTATTATTGTTAAATAAAAACA
>1039 a2b_12813
GTGAATTCATCATCGTCCTCGGGCAGCAATGTCTGGCGGCGTTTCTGTGGCCCCTCGTGGTCACGGGAGAAAACACATCCATAACACCTGTGAACTGTCTGCAAGCGCCAAAAGGCACCTCACCCGTGCAGCTTGGCATTGCACTTTACAAACTCTACCTGTAAAAAATGTCTATATACAAAACAAAT
>104 a2ogrp_1980
GCATATGGAGTTGACCACTTGTTGGTCGGCTCCGCAAACCATATATACACTGTGCACTTGTAACACACACACCATGCAATAATGAGATGAACGTCTGATTAGAAAAATGAATGA
>1040 a2igrp_1569
CAGAGTTGCAAAACTCCCACAAACCATCGCGAATCTTACCCGTACGGTTGCCTCGGCGCTGGCGGTCCGGAAAGGCCCTCGGGCCCTCCCGGATCCTCGGGTCTCCCGCTCGCGGGAGGCTGCCCGCCGGAGTGCCGAAACTAAACTCTTGATATTTTATGTCTCTCTGAGTAAACTTTTAAAAAGTCA
>1041 a5i_4033
AAGATTGGCCGAAAGGCCTCATCTCTATATCCCTCACCTCTGTGAACTGTGGACCTCTGGGTCTATCTTAACAAACATCAGTGTAATGAACGTGTATAATTTTAATAAAACA
>1042 a14igrp_2003
CAAAGTTTTCTATTAAAAACTGTGTTCGGAAAGTGTAGTTTGGCACTGTGTGAAAGCAGTGTCAAAAGATAAACGCCTTTTTATGACTGACATGTTCTTTAAAAATGTATAA
>1043 a2i_33029
CCGAGTCTTTGGGGCCCTTCGGGGTCTCATCCTCTCCAACCCATTGTTTACCGACCACGTTGCCTCGGCGGACCAGCGGCTTCGGCCGCCCCTGGCTCACCCCTTTACCGGGGGCGCTTTGGAGCGTCCGCCGATGGGATCATCCAAACTCTTCTGAAATCAGACGTCTGAATGAAATATTTAATACTTCA
>1044 a2b_15470
CCAAATACCGGGAGCCCTGCTCCCGCACCTGCCGCGCGGCCTCCGCGCGGTCAGCGTGAAACCCCTTGTGAAAAGCCCCGGTTGCTTCGGCAGCTCCTCCCCCGCTCCGGCGACGGGACGGGTCAGTCTGCCGGCAGCTCCAGCGAAACTACTCTGCGGAAAGAAGCTTAATTGCAGTCTGAACTAAAAGTCGAATGACAACTTA
>1045 a8j._480
ACAAATACAAGGTGCCGGCCAAAAGCTGGTTTCCTTCAACACCTGTGCACTGTGATTGTCTCTGGTGGATTACGTCCACCGATCATGAACCCTGAAATACCTAAGTCTTAAATAATTGTTTAACAAAAA
>1046 a1ogrp_10313
TGAATGTACTCCATGTATTTCACACTTGAACCACTCTCGCATACGAAGTGGATCGGCTTGCCGAGACACGCCGTATCGAGAGTAAAAGTCAAACAAACCCTTTAACATTTATAAATTATTTTACATGAG
>1047 a5igrp_853
TTGGATTGTGGGCTTCGGCCCCATTACAAAAAACCCTTCATAACCTCTTGTGAACATGTCGGCCCTCGGGCCTTCAACTCCAAACTTTTGTGTGTCGTATGAACGTAACAACTATTAAACATAACA
>1048 a4d_13319
GTGATTGGCCTTATGGCCTATTATAAATCCTTTATACCTCTGTGAACCTGTTGGCCCTCGGGCCGTTTTACAAACATTGTGTAATGAACGTCTTTACTATAAACAAATA
>1049 a6igrp_22854
ACGAGCAAGCCATTTCTTGGCAAGCTGTTTAAGCAATGTTCAAGTCCCTGGGACCAATTGCTGGCTCTGGGCGGCTTCATTTGAAGCGACAACAGCTGCGACTGGCTTGTCAACTGCAGTGAGTTGGATTGGAGTAGTTGCGCTGTTAGTGTTCCAGTGTTCAAGGTTGGGTGCCCATTTCTGGCATTTTGCTAGAGCTGTGTCTTCTGGGGATGCAGTGGGCTGTAAAGTTGGCGTTCACTGGCGTTGACGCCCAGCCAAAGCTCCGTTGAGCTTATTTGTCTTTAATTTGCTTTTAAACTGTTGCTATGCAAAATTTAAAATAATACTGAGAGAA
>105 a5i_8541
ATGATGCCCTCGACGCCTTTACCGGCTGGTAGGGTTGTGCCGGTCTCTTCGGAGTCGGCCTTATCTCACACACCGTGAACTGTGGCTTCGGCCATTTACACAAACTGTTAGTAATGAATGTAATATCATAACAAACATA
>1050 a2c_7833
ATGAAATGCAAGGACGCTCTTTTTAGAGGTCCGACCCAAATCATTTTCCTTTACACTGTGCACATACTACTTTTTTCTACACCATTTTTTAACGCATTAGTCTAAGAATGTAAAATCAGTCTCGAAAGAGCAATAAAGTAATA
>1051 a9l_26588
ATAATAAGTGTTTTATGGCACTTTTTAAATCCATATCCACCTTGTGTGCAATGTTTTGAAAATCGCCTTCTTGGTGGTTTTTTAATTACATCAACCAATTTTAACAAATTTGTCTTAAAAATTCTTGAATAAATATAATTCAAAAAA
>1052 a1igrp_29766
GGAGTGTGGGAATTGTGGTTGTATGGAACTGGAGTAACATGTTTATTGAAAGATACTCATGATTATTCTAGAAAATATTATTATTCAACACTAAACAAACAAAATTGACATGAG
>1053 a2c_744
GTGAAATTAGGGTGTCTGCTAGTCAGAGCCTGACCTCCACTTTATAACACTGTGCACTGTAGGCGGAGGAGGCCGTAAGGCTTCTTTCTGCGGCTTACTTTTAAACACTAGTCAATGTATGAATATGAAATATTAAACTAAGA
>1054 a4ogrp_8156
CAAGAATTCCTTCGGGAACTTCAACCCTTGTCAATTTACCTCTTGCTTGGTCGTCTTACACGGCCAAACTATCATCTGAACATGTTGTCTGAGTGAGACTAAATATACA
>1055 a5j_30786
ACAAATTCCAACTAAAAGAACCGTCTCTCGGGACGGTCTCTTTTAAACACCCTTGTGAACCGTTTATTGTCTCTGGTGGGTTAAAATGTCCTTTTTGGACAGGTTTTACGACCACCCACCTGTTTAAACTCATTACATTAACTGTCTTTACACCGTTTTGAATTCTATGAATTAAAAA
>1056 a1ogrp_10409
GTGAAACGGCACTCTCGTGCCACACATATTGGCTCTGGACTGTGCGCCTCGGCTGCACGTCTGGTTCCAACACGTGATTCTCACACCTGTGCACATTTCGGACGCGAAAGCGCCCGCCTTTTTCCTACACACTCCTGTCTCTGAATGTTAAAAACGATATAAAATCAAAA
>1057 a5d_27034
ACACGTATCCACGTATCAACCCCTCTGTGAAAACGCAAAAGCAGCAAGGTCTGGTCTTAGTGCGTCTGTCCGCTATGGGTCCTAATAATGGGTGACTCTCGGGTCACAGGGCTCGGACGGCGTGTGTTTGACGATCAACCGACACTTTACCATTGTTGGCCTTTACCAATTTTTAACCCCTTTGTACTCTCTTGTACTGAACCATTCTTCGATGCTCTCCCTCAAAAGAGAGTGACGAATGATATTACGAAACTTAAGAA
>1058 a4a_9305
ATGAGTTTGAAAGGGGTTGTTGCTGGCCTCCTCGGAGGTATGTGCACGCCTCGCTCATCCACTCACCCCTGTGCACATTAGGTGGTCTGGTTCAGTTGACCTTCGGGTGCTGGCCGGATCGCCGTTTTTACAAACTCCAAATGTAATAGAATGTAACTTTGCTATAAACGCATATA
>1059 a16ogrp_5490
ATGAAATCAAAGGTTAGAGTTGTTGCTGGTCCCCCGGGACACGTGCACGCCCGAGCCATTTCATCCACACACACCTGTGAACCCAATGTGGGCCGTGCCGTAAAAAGTCGGCTCATGTCTTCATAAACCAGTATGTTAACGAATGCATATTGAAGCCTCTTTGAGGTATAAATGCATA
>106 a14igrp_911
TTAGGGAGTTGTTGAGGTTTTATTTTACTGTATGGAAAGTACAGCAAGAAATATTTAACAATTACAAATTAAAGATTACATAAG
>1060 a14igrp_21746
TAGTATATCTATATCTAGGATGTGGGGTGCTCTCGGGCCCCCCGCCGCCAAACCTTGCAAATTTGAACTTAATAGTTACCTTGGTAGGCTTAACTGCCTGTGGATAAATCTAAATTCTTTAATAAACTGGCTGTAATTAATGTAACTGTCTGAAGTAATGTTAATATTAA
>1061 a13igrp_9075
TTGAATTGTTAAAAATGGGGAGTTTCGACTCCTCTACATTCTTTATTCCTAACACCTGTGAATCGTTGCTGAGTTTGCTCAGTGGCACCTTAATTTACACACACATAATAGTTTAGAACGTAAAAATAAATAAAATAAAAATA
>1062 a2b_7927
ACGAGCAAGGGCGGAAACGCCCGACCTCCAACCCTTTGTGTGCGAAACCCAGTTGCCTCGGGGCACCGCTCCGGCGGGCGCCCCGGCCGGCCTACAACAAACACTGCATCAATGCGTCAGAGTACAATTTTTTAATAAATTA
>1063 a2b_13535
CAGAGTTCATGCCCTTCGGGGTAGATCTCCCACCCTGTGTATTTATACCTTTGTTGCTTTGGCAGGCCGTCTAGGCTCACGCTTGGCTATGGGCTCCGGCTCGTATGTGCCTGTCAGAGGCTATATCAACTCTGTTTTTAGTGTTGTCTGAGTATCAATTAATAAGTTA
>1064 a7ogrp_3609
CAGTAGTCACCCGGGTTGCCGGCAAGGCCTCTCGGGTAACCTACCACCCTTTGTTTATTACACTTTGTTGCTTTGGCAGGCCTGCCTTCGGGCTGCTTGGCTCCGGCCGGCGAGCGCTTGCCAGAGGATCTAAAACTCTGTTTGTCTATACTGTCTGAGTACTATTATAATAGTTA
>1065 a5a_21434
AAGTATTAGAGAAGGTTTTGATGCCAGCGGTTTCTGACTGCAAGTGCTCGCCTTCAACAATTCTTATCCATACACCTGTGAACTATTGCAAGTGAGGGGAGAAATCCTTTTGCTTGTTATACATAAACTCGTTAATTTAATGAATATATCAAGTCGAAAGACTTATAATATCTAAA
>1066 a4d_2074
CAGAGATGGCTCCGGCCAACCTCCAACCACTGTTTACCTCCCCGTTGCTTCGGCCCTGTGCCGGAGACCAACTCTGAACCTTCTGTCTGAACAAACAAATAAGTTA
>1067 a10igrp_12529
GCAAGAAGGGGGGTTGGTAGGGGTAGGAGTGATGATGGGGAGATTGGGTTGTCGTGGGGCTTTTGCGCTGCGCATCTCTTTTTCTTTCTCATTCTCTCTCCACCACACCCACATTGGCACGAGGTCTCCGGGCCTCGATGTTTGCGCTTGTTTGTTTGCCAGATACAATGCTTATTAATTAGA
>1068 a6igrp_30475
GTGAAGATTTGGGCAGGCCATACGGACGCCACAAAGTGTCCCTGGCCGCCTACACCCACTATACATCCACAAACCCGTGTGCACTGTCCTTGGAAAGGGCATTTGGAGAGAAAAAGGAAGAGAGAAGCGAGAACAGTGCGATCCGTCGCGTTGGGCGTTGATCTCTGGCTTGGTCTCTCTGAGGCCCTTTCCTCGCTACAAACTCGAATGGTTAGTATGAACGTGGAACTTGGTTGGACCGTCACTGGCCAACAAACTATACA
>1069 a8j._841
TTGAACCTTTTGGCGGCGCAAGCTGCCAGACTCTTCGGAGTCGACACACACACCGTGAACTGTGGCTTCGGCCTTTTACACTTTATGTATGAATGTATTACTATAAACAAAACA
>107 a10igrp_4950
TTGAATTCCAATTGGATGAGATAGCTGCTGGCTTTCGGGCATGTGCGCATCTCGTTCATTTGCCTCTCACCTCTGTGCACTTTTCATGGAACAATCGGTGGCTGTTGGCTTCACGGCCGATGACCGCAGGTTGCTTCTGTGTGCCTCATAAACTTCAGAATCAGTTTAGAATGTATACCGTGTACCTACACATTTAAATA
>1070 a2i_9379
TCGAAGCCCCTACGGGGCGCCTCACCGCGGTTCCTCGCTGTGCGCCTTTGGGCTGCACGCGCGGTCCCGTCACGTGATTCTCACACCTGTGCACTCTGCGGGTGTCCCCTCTCCGGGGGACGTCCGTCTACACACACCACACATGTCTATGGATGTCTTACTTTTGTAACCGATA
>1071 a8ogrp_26385
CCGAGTGAGGGCCCTCTGGGTCCAACCTCCCACCCGTGTTTAACGAACCTTGTTGCTTCGGCGGGCCCGCCTCACGGCCGCCGGGGGGCATCCGCCCCCGGGCCCGCGCCCGCCGAAGACACCTGTGAACACTGTCTGAAGTTGCAGTCTGAGAAACTAGCTAAATTAGTTA
>1072 a3igrp_8811
CTGAGTGAGGGCCTCCGGGCTCGACCTCCAACCCCATGTATTCCGACTCTGTTGCCTCGGGGGCGACCCTGCCTTCGGGCGTTGGGGCCCCCGGTGGACCACACAACTCTGCATCTTTGCGTCTGAGTAACACTTTGAATTAAATCA
>1073 a9igrp_16925
CCGAGTGAGGGCCCTCTGGGTCCAACCTCCCACCCGTGTTTATTTTACCTTGTTGCTTCGGCGGGCCCGCCTTAACTGGCCGCCGGGGGGCTCACGCCCCCGGGCCCGCGCCCGCCGAAGACACCCTCGAACTCTGTCTGAAGATTGAAGTCTGAGTGAAAATATAAATTATTTA
>1074 a14igrp_14709
CTGAGTGAGGGCTCACGCCCGACCTCCAACCCTTTGTGAACCAACTCTGTTGCTTCGGGGGCGACCCCGCCGTTTCGGCGACGGCGCCCCCGGAGGTCATCAAACACTGCATCTTTGCGTCGGAGTCTTAAAGTAAATTTAAACA
>1075 a20ogrp_3501
GTGATTGGCCTCTGGCCTTAATTCATGTCCAACCTCTGTGAACTGTGGCCTCCGGGCCGTATTTTAAACATCAGTGTAAAAGAATGTAAAACATTAAGAAAAAACTA
>1076 a8ogrp_6736
CCGAGTTTTATACTCCCAACCCTGTGAACATACCAAATCGTTGCTTCGGCGGGCGACCCGGGGGGTCCCCAGGCGCTTGCGCGCCCGCCGACGGCGCCAAACTCGAGCTTTAGCGGACTTCTGAGTAACAAAACAAACAAGTAA
>1077 a2igrp_2142
TTGAGTTAATGCTGTTTACAGCAAACTCTCTAATCTCATGTGATGATATCAATAATGGCGATTAAGCCAAATTCAAAACCTATAATGTTTATCATTATTTTCTAGAA
>1078 a2i_31345
AAGAATACAAGGCCTTCGGGCTCTATTCTCACCCTTTGTATACCTACCTTTGTTGCTTTGGCGGAAACGTCAGAGGACCGAAACTCTTGAATCTCTGCTGTCTGAGTACTATATAATAGTTA
>1079 a5k_15658
ACAAGTCCGCTGCGTGCGCAACACCCTTGCGTATGCACATCCGTTCCATGCGCACATATGCTCTTGTGTGTGTGCATGACATTTCTGCAAATCTCTGATTGTCGCATCACAACAAATAATAC
>108 a1b_41
GATTGTGGTGGTGAGAGAGTTGGGCTGAAATGAGAGAGCATATGCATTTTAAACATCAAATCAAA
>1080 a4igrp_3499
CAGAGATGCTTCGGCAACTCCAACCCATGTTTACTTTCCTGTTGCTTCGGCGCTTCGGCGCCGGAGACAAACTATAAACCCTTTGTCTGAAAACATAAATCGTTA
>1081 a7ogrp_438
CCAGAGTGCCTTTAGGCTCTCCAACCCATTGTGAACATACCTACGTTTCCCTCGGCGGGTCAAGCGCGCTGGGCCTCCGGGTCCTGGGCGTCCGCCGGGGGCGACTCAAACCCGAA
>1082 a1a_3827
CAGAGATGGCTCCGGCCAACCTCCAACCACTGTTTACCTCCCCGTTGCTTCGGCCCCGTGCCGGAGACCAGCTCTGAACCTTCTGTCTGAACAAACAAATAAGTTA
>1083 a8j._950
CAGTGTTAGGCTTCGGCCTCATTCACACCCCTTGTTTAACCTCTGGTTTCTTTGGCGATGTCTATGACTCGTCAAACTTTAACTCTGATAATGTGATACTGTCCGAGTGAAATTGAATTATAA
>1084 a2ogrp_5828
GTGAATCATAGAGTGCTCGAAAGAGGCTCGATTAACTATCCATACACCCAGTGAACTTGTCTTTAAATTGGAGGAAACTCTTAGGTGGCAACGCCTTTGCAGTGTACTCCTCTTTTCATACACACACACCTTTGCTTTAATGAGATGATGATGTAAATTTGATAAACCATGA
>1085 a1igrp_7737
GTGATTGCCATCTTGGCTTAAACTATATCCATCTACACCTGTGAACCGTTTGATTGAATCTCTGATTCAGTTTTACAAACAATGTGTAATGAACGTCATTAGATCATAATAATAAA
>1086 a6ogrp_16111
GTGAAACACCGGATTCCTCTGCAAAGAGAAGGTCCGATCCACTATCACACACACTTGTGCACTTGTCATTTTTTACAAATTCAATTTGTATTACACACTTTTGCATTGAAACAGTTGATTATATAAACTTAAAACGAAGAA
>1087 a2b_3320
ATGAATATTAGGGCGTTCTCTTCATCAGAGAGGTCCGACCTTCATTTCCAACCCTGTGAACTTAAATATGAGGACTTGCTCCGGCGAGATACTCATTCATTTTAAAACTCTTTAGTTATTGAATGTAAACAAACCAAAACAAA
>1088 a7igrp_26317
TTGAATTGTTAAATGGGGAATCTTTCGAGATTCCTCTACATTCTTTATTCCTAACACCTGTGAATCGTTGCTGAGTTCGCTCAGTGGCAACATTTTTTATACACACATAATAGTTTAGAACGTAATAATATATAATAAAATA
>1089 a2b_8369
ATGAAATGCAAGGGTGCTCTTTTTAGAGGCCCGACCAACTCATTTTCCTTACCCTGTGCACAAACTGTTTTCACACCTTTTTATACACGAAAAAAGTATAGAATGTAATCAGTCCTTGATTGGACATTAAACATAATA
>109 a7ogrp_11616
ACAAATCTGCTATGCGGCCGAGCCTTCGGGCTTGACGCATATATTTACCCCGAGCCTGGCAGCAATGCCGGCTTTGGTTGGGTGGGACGCAAGTTCTGCTTCCGGTTGTGTGAGGGCGCGAGCCCTTGCCAAGCCACATAGACGCTTGTATGTTTGACAGAGTTACAGTTGTAAAACTAAAATGA
>1090 a1b_19524
TCGTAGGGCTCCGGCCCTGTCGAGATAGAACCCTTGCCTTTTTGAGTACCTCTTCGTTTCCTCGGCGGGCTCGCCCGCCAGTGGGGACCACAAAAACACTTTGTAATACCTGTACTGTCTGAGAAACAAACAAAAATTA
>1091 a6igrp_11371
CGTATTTTAGGCCGGTCTGACCGGTTCTATTTCACCCTGTTTTTTGCGTACTCTCTGTTTCCTCGGTAGGCTTGCCTGCCGATAGGACATTTCAACTCTTTTAATATTAGCAATCAGCGTCAAATAAAAATACAATCGTAA
>1092 a2igrp_8283
CCGAGTGAGGGTCTCCGGGCCCGACCTCCAACCCTTTGTTAATAAAACTGTATTATATCCCTCGGGGGCGAGGGTAACCTTGACCCCCGGTGGGGAATTCAACTCTGCATCTTTGCGTCGGAGTCTTAAAGTTAATAAATA
>1093 a5i_8572
CCGATTGCAAAATCTCTAAACCATCGCGAACGTTACCCCACGCCGTCGCCTCGGCGGGGGAGCCTCTCCGGGGGCCGCCCGCCGGTGGTACCACAAACTCTTTTTATTTACAGGCCTCTCTGAGTATTTATACAAATAAGTTA
>1094 a1i_32325
ATGAAATCCACTCTGGTTGTGCGTCCCTCGCACGCTGGAGAATTTCAATCACACACCCCCTTGTGCACATTTGGGCTTTGGCCCGCCTTTACACACCACGAATGTTTTAAGAATGTGAATATATATAAACCAATA
>1095 a11igrp_5275
CAGAGTACCGGCGCCCCCTGGGCGCCCACTCCAACCCCATGTGTACCCGACCTCGTTGCTTTGGCGGGCCGGCGCCCCCCGGGCGCCGCCGGCCCACACGCTGGACCGCGCCCGCCAGAGGAGACATAAACACCGCTCACCTCGACGTCTGAGTACAAAACAAAAATGAATCA
>1096 a14ogrp_2625
TAGATTTGGCTCCGGCCTTATTCATCCTTAACACCAATGTGAACCTGTCCGGCCTCCGGGCCGACCCATCCAAACAATGTGTAATGAACGTGAATGATTGTAACCATAATA
>1097 a8igrp_8981
CTGGGTCACAGGGCGCCTCGGCGCCCGTCACCACCCCTGCTTCCCGCCCCCTTTCGGCGCGATGGGGTCCCCTTAGTGGGGCCCCCTGCCGGAGCCCAAACTCTGAAGAAACTTGAAGCCTGAGTCGAAAAGCAAATAGTCA
>1098 a14ogrp_2022
ACAAATCCGGTGTACTACTGTTGTTCATGTGCATTTCCATGTGCATGCATCAGTGACACACAAGTTCCATGTGCACGTTCACTCTGCACATGACATTTCTGTTTATTGTCTGATTGTGATTGGTGTTGAAATGATAA
>1099 a9ogrp_12041
GTAATTGTCGCAAGACTATACACTTGTGCGTTTGTGATGTTTTTGGGTCTGGCTCGCTAGGCCCAGCATAACCCTACTGCAACTCTGAGATACGAAAGTAATTAAAA
>11 a14igrp_1556
TTGAAACTTCACGGGGGCGCGTGGTTCGGCCTGCACCGGCGGCGACGTCGTGCTGCGGTCGGCCGTGCGCCCTCTTCCAAACCCAAACACCTGTGAACCTTTGGGATGGCGCGCTGTAGTGGCCCGCCGTCCCGTTTACAACCAACTCTGATGTCTATTTGAATGTGAACTCGGGGCATCCCCGATTTAAACTTAAAA
>110 a8i_12792
CAGAGTTCGTGCCCTTCGGGGTAGACCTCCCACCCTTTGTATACCTTGCCTTTGTTGCTTTGGCGGGCCGCCTTTTGGCCACCGGCTTCGGTCGGTGCGCGCCCGCCAGAGAACCCAAACCCTGTGTTACTTTGTTGTCCGAGTACTATATAATAGTTA
>1100 a4d_2290
CTGAGTGAGGGCCTCCGGGCTCGACCTCCAACCCCATGTTATCCGACCCAGTTGCCTCGGGGGTGACCCGGCCCTTTGGGCCCGGGGCCCCCGGTGGACCCCAAACGCTGCATCTATGCGTCCGAGTACATATTGAATCAATCA
>1101 a15ogrp_15057
CTGAGTCTTACGAACTCCCAACCACTGTGAACATACCCACGTTGCTTCGGCGGTCACGCCCCGGGACGCTGCGCTTCGGCGCCGTCGTCCCGGGCCCAGGCGTCCGCCGGAGGCCCCAAACTCCAATGTAAACATTGCATACATCTGAGTGGCATAAGCAAATAAATCA
>1102 a16ogrp_3550
CAAATGAAGCCGGGCAACCGGTCCTTCTCACCCTTGATTTTATTCACTTGTTGCTTTGGTGGGCCGCGAAAGCGCAGGCTTCGGCCTGAGAGTGCCTGCCGGAGGACCACAACTCTGTAATATTTACTGTCTGAGTACTATATAATAGTTA
>1103 a5i_26760
GTGAATTCTGGGAGTCCCTCTTAACCGGAGAAGGCCCAATCCACTACTTTACAAACACTTGTGCATTTGTCCCTTTTTACCTTTTAACCCTTTTGCATTCGAAACGGTTGATTGTGATTTAAACCAATTGATAAATTGAAAGAA
>1104 a1l._10761
ATGAATTTAAGGGTGTCCTCTTCATCAGAGGGACCCGACCTTCATTTCCAACACTGTGAACCCAAAAATATCGAGGGAGCTCGCAAGAGCTGGACTCGTATTTCATTTTAAAACTCTATAGTTAAAGAATGTAACAAACCAAAACAAAAAACTTAACTACAAC
>1105 a3igrp_3631
CCGAGTTTACAACTCCCAAACCCCTGTGAACATACCTGTTTTGTTGCTTCGGCGGTGCCCTCGCTCTCGCGGCGAGGCCCGCCAGAGGACCCAAACAAACTCTTTGACTTTGATCTAGGATTATACTTCTGAGTGATATAAAAAATAAATCA
>1106 a16igrp_4073
AAGAGTTGCAAAACTCCCAAACCATTTGTTTATCTACCTGTTTCGTTGCTTCGGCAGGCGGCTCTTCGGGGCCTTAGCCATCCGTGGTGCCTGCCGGAGTATCTAAAACTCTTGTTAATTACTGTTCTGTCTGAGTAAACTTTTAATAGTTA
>1107 a4b_23057
ACCATTGGATACCTTCGGGTATATCCCATCCGTGTCTACATACGTCTTGTTGCTTTGGCAGGCCGTGGTCACCCACTGTGGGCTATGCCTGCATGCGCCTGCCAGAGGACCAAACTCTGAATATTAGTGATGTCTGAGTTACTATATAATAGTTA
>1108 a4igrp_29752
CAAATCGAAAGGTGGTGGGGATGTGGGATAGTGGGGGAGAGAGATCAAACCCGCTGTACCGCACCTGCTGCCGACATTTGGTCGGGACTGCGAGTCCCGGAGTCATATTCACGCTTGTGCTGTTTGACAGAGTAACAGGAAACTTAATTATGA
>1109 a13ogrp_3429
CCGAGCGAGGGCCTCCGGGGTCCGACCTCTCAACCCCATGTTATCCGACACTGTTGCCTCGGGGGCGACCCGGCCCTACGCGGGTGTCGGGGCCCCGGCGGACCGTCAAACGCTGCATCTGTGCGTCCGAGTCATTATGAGAAATCAATCA
>111 a6ogrp_84
ACAAATCATCTGTCGCAAGACAGACATTCGTGCCTCCAAGCACACATGTGTACCAGTGTTACAGTCAATATGTCAAATACAA
>1110 a13igrp_21834
ATGAATTCAAATCGTACTGCTCACGCGGTATGTGGGGTTATCTGCTTGTCAGACGACCCATTCATATCCATAACACCTGTGCACTGTTGGATGCTTGCATCCACTTTTAAACTAAACATTATTGTAACAAATGTAGTCTTATTATAACATAATA
>1111 a8ogrp_5038
CAGAGATAGGGTGCCGCCCCTCGCGCGGCGCGCCCCGACCTCCAACCCTTTGCTTACCCGACCTCTTGTTGCTTCGGCAGGCCCGTCCCCCTCACAGGGGACCGCCGGGGGTGCCTCACCGCCCCCTGGCCCGCCGCCTGCCGACGGCCCCAACCTAAAAAA
>1112 a9igrp_25285
CAAATCAGTTTGGTGTGTGGTTGGGTTTGTTTGGGCGGGGTTTGTCTCTTTGGGTGTGGGCTCTTTTCAGGGTCTGTGCTCCTTGGGTGCAAGCTCTGTTCCTCACGCTAACCATCATCACATATGCACAGCAGAGGCTCCCGGTGCAAACCAGGACCGATGCTGATGTTTACGCTTGAATGTTTGACAAATCAAATAGGATTAAATTATATA
>1113 a9f_21782
AAAGTTACCGCTCAGCTTTGCTAGCGGACGACTCATTAGTCTACCTCCTCACGGAGGTTAGGTTATGGTCTTTACCCATTGTGAAACTCTACCTTTGCTTCGGCAGCACTCTCAGTGAAAGCTGGAGGGGTCAGGCTGCCAGAAGCCCATATCAAACTAGTTTATGAAATGTCATGCTGTCTGATAACCACTATTTGAGAAATCAAATTTATATTA
>1114 a8j._2816
CTAGAGCAAAGGATAGCCAGCCCTGCTTCGGTAGGGTTGTCGTCGGGCCTCTCGAAGAAGCTCGGTCCTGAACTCCACCCTTGAATAAATTACCTTTGTTGCTTTGGCGGGCCGCCTCGCGCCAGCGGCTTCGGCTGTTGAGTGCCCGCCAGAGGACCACAACTCTTGTTTTTAGTGATATCTGAGTACTATATAATAGTTA
>1115 a13igrp_10969
TTGATTGACCGAAAGGTCTTGATTAACATCCCTCACCTCTGTGAACCGTCTGACCTCCGGGTCTGGATAACAAACATCAGTGTAAAGAACGTCTAGTTATTTTAACAAAAACA
>1116 a1a_4155
TCGATTCACCACAAATGTAGAAGGGAGTTGCTTGCAGCTGTGCTGGCTTTTTCGGAGGCATGTGCACGCTCGACTTCTCCTTTTCTTACATTTACACACCTGTGAACCTGTTGGTAGGGCTGCCTCGCAAGAGGACGCTCTATGTCTTTTTCATATACTCCTTTGTATGTTGATAGAATGTATCGTTTTGCTCTCGTCAGAGACAAACACAAAAGTTATTA
>1117 a4k_26437
ACAGTGCCCTGGCTTTTAGTCGGTGGACCACTCCTCTGCCCTCCCGTTCGCGGGGCGGGTTATGAGTATACCAATTGTGAAACTTCTACCTTTGCTTCGGCAGCGCTCTCAGCGGGCAACCGCTGGAGGGGTAAGGCTGCCAGAAGCCCCTTTCAAAACTAGTTGATGAAATGTCATGCTGTCTGATAACCACTTTTGAGAAATCAAATTATATTA
>1118 a8ogrp_30405
ACAAATCTGCTGCGTGGCGTCGCTGGAGGGTCCGCGCCCTGCAGTGCACACCACGCATATTCACCCCGAGCTGGTGCCTCACGGCGCCGGCTTTGGTTGGGCAGGCCTGTCCTTTCGGGGACGGGGCTGCTCCGGACAGTGCTCTTGTGCTTGCACCTGGGCCTGGCCACATAGACGCTTGTATGTTTGACAGAGTTACAGTTGTAAACTAAAATGA
>1119 a9l_25469
TTGAATAAACATTTGATAGGCTGTTGCTGGCCCTTGGTAGTGTGCACGCTTGTCATTTATTTGTTTGTTTTTCCACCTGTGCACCTTTTTGTAGACCTTGGAATTTGGGGACTGCTGTGCCGAGTGCCAGCTTTTCCTTGTCTCTCTCTAGGTTCTATGTTTTTCACATACTCCTACGAATGTAATAGAATGTTGATCTGGGCAATAAAGTTATATA
>112 a4i_7546
ATAATAAGTGTTCTACTGCTAACTTTTTTAAAAATAGTACTCACCTTGTGTGCAATGTTGTGTGGAATTCGTAAGAATTTCACACCTACACCAACCTATAACCTTGAACCTACTTTGTCTAGAAAAACTATTATAGAATTACTTTAATTACAAAATAC
>1120 a4d_11283
TCGTATCTCTGACGAGGCGGGCCGTCCCAGCTCGGGTTCCGAAAGGGCCTTTGCAGCGGGTCGCCCGTCGCGCTCAACCTTCACAAACCCCTGTGCACCTTTACGGTAGAGGGTGGTGGCGAGAGCCCCGCCCGATGCCGCATAACACAAACACTTGTATAAAAGAATGATACGTGGCCTCTGTGCCGCCTAAAAACNTAA
>1121 a15ogrp_9751
CCGAGCGAGCGCCTCCGGGCGCGACCTCCAACCCTTTGTGAACCAACCTCTGTTGCCTCGGGGTGACCCGGGCCCGCCCGGCCCCCGAAGGACAATATGACAACTCTGCATCTTTGCGTCGGATATGAAAAGTAATTCGAAATGA
>1122 a4d_21355
TCGTATCTCTGACGTGGCGGGTCGGCCCTGCTCGGGTCCCGAAAGAGCCTTTGCAGCGGGTCGCCCGTCGCGCTCAACCTTCACAAACCCCTGTGCACCTTTACGGCGGAGGGTGGTGGTGAGAGCCCCGTCCGATGCCGCATACCAAAAACACTTGTATATAAAGAATGAAATGTGGCCTCTGCGCCGCCTAAAAACATAA
>1123 a10ogrp_11481
CCGAGTCTCCGACTCCAAACCACTGTGAACCTACCTCTCTCGCGCTCCGCCGGGTCGGCCCCGGGGGGTCGGTAGCCGCAAGGCACCCGGCGGAGCCCTAGAAAAATTCTCATAGCGAGCTTCTGAGTCTGTCTCTAAAGAGTCA
>1124 a5i_15671
CCATTGCGGCCTTTCGAGACCGCGCCTTCAACTCGCCCGCAGGACCCCACGAAAGTGGCCGGAAGTGCGGTCGAGGCGAAAGCAACCCTTGCCTATGAGTACCTCTTGTTCCCTCGGCGGGCTCGCGCCCGTCGCTGGGCCCAACCAAACCCTTTGCAGTAGCAGTATACCTCTGATCGTGGGCACTTGAATCTTAA
>1125 a6igrp_13097
CTGGAACAAACGCCCTCACGGGTGCTACCCAGAAACCCTTTGTGAATTATACCTATACCTGTTGCCTCGGCATTGGTTGGCCCTCTTTCCGAGGATCCCTTTTTGTTTTGTTTTTTAACAAAAGGAGCAGACCGGCCGGTGGCCCTATCAACTCTTGTTTTTGTAATATCATCTGAGTAACACAAACTATAAATGAATCA
>1126 a3igrp_19954
CTGTTTCTTTCTTTACGTTTGTGAACCTGATTTTTATGGGTTTGATGTGATGTGATGTTGTATTGTTATGTATGTTATGTTGTTTTGCTTTTGCAAAGCATATCATAGCATAGCATAAGCATATCATGGCATATCTACAATCCTGAAAATCGCCATTTACTTTTATCCCAATACGCCTAAAAATATTACAAATCAAAAAA
>1127 a3igrp_18779
TTGTAAAACAGAGGGGGTGTCCTCCACCCTGCTCCGGCTTTGCGGCCGTGAGCGGGTGGTCGCGCCCCTTTCCACAACCAAACCCCTGTGCACATCTCTGGGGACTTCTGGTGGGTTCGCGCCTGCCGAGTCCCTGGCTTTACACAAACTCTTCTATGTCTATAGAATGTTCAAGGACCTCGCATCCTGTTAACAAATAA
>1128 a9d_22788
GTGATTTAATCGGTCGGGAAGCAGCAATGCGACCCGAGGCAGCAATGCCGAAACTTTGTGTGCACCAACCTATTGTGGGAGACGGAACAGGGAGACGACTGGTTTCTAGCTTTCGGCTGGAGCCTGTCGCCACCTTTTTCGCCTTTTTCAACCTTGTCATTTGATTTACCTATCTAACAAGTTGATTAAGTAAAATAATTAA
>1129 a9b_17312
CAAATCATTGCGAGCCCGTTGTCAATAATAACAGGTTACTGTTGTCATTGACAATAATGGGGTGAGCACATTGGCACAGGACTAGCGGCAGCTGGCTTGCTTGTTTGCTCGCTAGTCTTGATGTTTACGCTTGCTTGTTTGACAAAGTTATCATGTGACCTAAATATAGA
>113 a9igrp_6103
GTGAATCTTCAAAAGTCGGCTCTGTGGATTGTGCTGGTGGAGACACATGTGCACGTCCGCAAGGTCGCAAACCCCACACACCTGTGCATCTATGACTCTGAGTGCCGCTTTGCATGGCCTTGACCGGCCTGGCGCTCGAGTACTTTCACACACTCTTGAATGTAACGGAATGTCTTGTTGTGCATAACGTACAAACAGAAA
>1130 a4ogrp_6718
ACAAATCTACTACATACGGTCCCATGCATCGCCGGTGCGTGGGAATCGACACACGAAGACAGTTTGACCGAACTATATGGACGACATGAAAC
>1131 a9igrp_27055
CAAATCAGTTGGTAGGGTGGTTGAGGAGGGGGAGAGTAGGGGGTTGGAGAAGGGAGGTTTGGTGAATTTCGGTTCATCAGCCTGTTTCTTCAATCCCTCCATCCCCTCCCTCCCCTGCACATTTACGCTTGATTGTTTGACAGAGTTTAGCATCATGAAATTTAGA
>1132 a1ogrp_14108
CCGAGTTCAGACTCCCAAACCCCTGTGAACATACCGCACGTTGCTTCGGCGGAGCGCCCCGGCGCCCTCTCACCCGAGGGCCCGGACACCAAGGCGCCCGCCGGGGGACCCAATCTCTGCATTCGCCGCCGGCGGAATCTACGTCGTG
>1133 a5d_7121
CTGGGTCACCGGGCGCCTCGGCGCTCACCCCCACCCTTCGCTTCCCGCCCCATGATCGGCGTCAGGCGGGCCCCCTTCGGGGGACCCTCCGGCCGAAAACCAAACCCTCGCAACCCTTTGCAGCCTGAATTAAAAAGCAAATAATTA
>1134 a19igrp_6590
ATAGAGATGAGATGATGGATTTATACACTGGGGGTTTATTCAACCAGCACACACACATGATTACAAACTAACAACACATACAATTACAGAAG
>1135 a9l_22976
CTGTGAGTATGTTTATATATTTGAGAGACTCTGTTGGAGTGTAGAGGGGGATGTCTCTGCCGATGAATTATTGGCTGGAGCATTATGATTCTGCAGCCAACAGGGTGCATTTACTTTGGCCGTCGTCTGTCGTAACACATTACTAATA
>1136 a1a_5061
ACAAATCGGTGTTATTGGTGGTGTGTTTCCCTCCCTGCTAAAGGGGCGGGGAGCATGCCCCTAACATTAGTTCTGGGAGCAATCCCGGATGATATAATATTATTATACATTTATCATGAGAAGTGAGAATTGTGGGACAAACAAATAC
>1137 a15igrp_13766
CTGAGGAACTCGCATCGCTGTTTGCTGGCCTTCGGGCATGTGCACGCGGTGCTCCTTCTATCTTACACCTGTGTACTTATCGGAGAGACGCAAGTCTCTTTTCATATAACTCCATTGATAATTCAGAACGCATTTGTGATAATTAGAA
>1138 a1c_3960
CTGAGTGAGGGCCCTCGTGGTCCGACCTCCAACCCATTGTTGTCCGACTCTGTTGCCTCGGGGGCGACCCGGCGCTTCGGCGCCAGGAGGTCCCCGCTGGTCCACACAACTCTGCATCTTTGCGTCTGAGTAAACATTAAATGAAACA
>1139 a2j_989
GTGAATATTAGCGCATCTACTTGTAGAGCGTGACCTCCACTTTCTAACTCTGTGCATTTATTGGCGGAAGGACTTGAGCAATCGAGTTTCCTTCTGCGGCTCATTTTAAAACACTAGTTAAAGTATGTAACGAAATATCGAAACAAA
>114 a9igrp_7573
TTGAACAATCAAACCAATGTAGACTGTGCTGAAGCTGGCCTTTCGAGGCATGTGCACGCCAGTTTGCAATTGTTCTCCATCCACCTGTGAACATTTTGTAGACTCATAAGGCGTCAAAACACCTGCAAGGGTGTTGTGAGGGGGAAACCCTTCAGCGACTTGTAGTCTATGTTTTATAAACTCGAACGAATGTCATAGAATGTCTTGTTATATTCAAACACAATA
>1140 a9c_11198
CAGTGTTCCCTGCCCTCACGGGTAGAAACGCCCACCCTTTGTATATCTTATCTTTGTTGCTTTGGTAGGCCGCCTTCGGGCGCCGGCTCTCGCTGGACCGTGCCTGCCAAAGACCCCCCAAACTCTGAATGTTAGTGTCGTCCGAGTACTATATAATAGTTA
>1141 a4d_2465
CTAGAGAGCGGGCTTCCGGGCCCGACCTCCCACCCTTGCAGTCGCATCAGACGATCCGTGCCTCGGGGGCGACCCGGCCACAGCTGGGCCCCCCGCGGACGACCGCCCAACTCGAGACATGTCGTCCATTCAAAACACAAATAGAAGCA
>1142 a15ogrp_28270
CCGGGTCTCTGACTCTAAAACCACTGTGCATCAATACTTTTACTGCTGAGGCGGGCCGCTCGCTGGGGGAGCTTGAGCCTGTAAAGGTGGCACGCCGAAGCAACTTTTAAAACCTGAAAACCTGAAAAAGAAAAAACTTTTAAATTATCA
>1143 a13ogrp_718
TTGAATTGTAAAAATGGGGAGCTGCTTTCGAGCGTTCCTCTACATTCATATCCTTAAACACCTGTGAATCGTTGCTGAGCTCGCTCAGTGGCACCATTTAACATACACTATATCGTTTTGAACGTAAAAATTATAAAACAAAATA
>1144 a9ogrp_17786
ACAAATCAGTTATATGGCTTCGGCCATATATATTCGACCCCAAGCCTGGGTTTACGCCTGGGCTTTGGTTAGGCTAGTGTGCTTCGGCGTACTAGCCACATAGACGCTTGTATTGTTTGACAGAGTTTAGTTGCATCAAAAATGA
>1145 a5igrp_32529
ATGAATTTTAGGGCGCTCTTTTTAGAGGTCCGACCAATTTCATTTCCACACACTGTGAACACACTTCATTTTTACACACAATTTATAAACACACAAGTCTATAAGAATGCATAAAGTCTCTTAAATTGAGTCATAAAGTTATAATA
>1146 a16ogrp_7980
CCGAGCGAGGGCCCCCGGCCCGACCTCTCAACCCCATGTTGCCCGACACTGTTGCCTCGGGGGCGACCCGGCCCTTCGGCGTCGGGGCCCCGGCGGACCGTCAAACGCTGCATCCGTGCGTCCGAGTCAAACGATAAATCAATCA
>1147 a8ogrp_19424
CAAAAGGCGCCTTCGGGCGCTGCCTGTCTAACAGGATACCCTTGAATTTTGCACTTTCTGTTGCCTCGGTGGGCTTGCCCGCCAGCAGAGGCCCCTTACAAACCCTTTGTAATTGCAGTATCAGTCTGAGAAAAAACAATATCA
>1148 a7igrp_5091
ATAAATCTAGAAGGTCTTCAAGACCTCTCTAACATCTTGTGAATTGTTTGTGTCTCTGGTGTGTTGAAGTATAGGCTCTTGGGCAGATACCACGCACACCGGGTTAAACTTTGTATAAATTATAGCCTAAAAAATCTAAAAAAGTAATTAAAA
>1149 a2igrp_7046
GAGATTTACACCGGCCCTCGGGTCGGAGGGTGTCGAGCTTGCTCCTCGCCCGTCACACACACACCTGTGAACGGAACGGACGCTCACGCGGCCGGACCTATTTAACAACTGTCGTACTACGTCATGAAAGCAAAACAAAAGAAAA
>115 a8ogrp_16559
CAGAGTTCATGCCCTCACGGGTAGATCTCCCACCCTTTGAGTACTATACTTTTGTTGCTTTGGCAGGCCGCTTCGGCTACCGGCTTCGGCTGGTGAGTGCCTGCCAGAGGACCCCAAACTCTGAATTATAGTGTCGTCTGAGAACTATATAATAGTTA
>1150 a4a_8774
GTGAATTTAGAGCGTAACTTCGGTTAGCTCAACCTTCATTTTCCAACTCTGTGCACTATTGGCGGACTGGGAGCAAGTAATTGCTATTCAGTCTGCGGCTCACTATTAAACATTAGTTAAAGTATGTATATAAAAACAAAACAAGAA
>1151 a15igrp_16932
TTGAATTGTAAAAATGGGGAAGTCGCTTTCGAGCACTCCTCTACCTTTCTTTATTCCTAAACACCTGTGAATCGTTGCTGAGTTCGCTCAGTGGCACCAATTTAAACACATTTATAGTTTTGAACGTAAAAGAACAAAAACAAAATA
>1152 a20ogrp_6426
CTGCTTGCTTATGGCCATCGAGGGGGGAAACCCCCTCGGCGGTACGGCAACACCCACCCTTGCTTATGTATACCTTTCGTTATTTCCCTCGGCGGGGCAACCCGCCGCTGGGGACATTAAAAACCTCCTGTATCAAGCATCAAAACTTCTGAAACAAAACTAAAATATAA
>1153 a14ogrp_17024
CAAATCACGGATTTGGTGGTTGGGGGTGGAGAAAGGGGGAGAGGTTGAGAGGAGTAGGTAGGTGAATTTCGGTTCATCGGCTCGTTTCTTCAATCCCTCTATCCCCTCCCTCCCTCCAAACGTTTACGCTTGATTGTTTGACAGAGTTTAGAATGATGAAATTTAGA
>1154 a1igrp_8771
CTGAGTCGTAAAAAACTCCCAACCCATGTGAATTTACCTTTGTTGCCTCGGCGGGACCTACCCGGTACCTACCCTGTAGCTACCCTGTAGCCCGCCGGTGGACTACTTAACTCTTGTTATTTTTAGAAATCTGAGCGTCTTATTAAATAAGTCA
>1155 a10ogrp_11622
ACAATAAGTGTTTAATGGCACTTTAAAATCCATTACCCACCTTGTGTGCACTGTAGGGAAGGGGCAGAACCGGTGCGCCACACATGTTGTGTGCTTGCTGGCCTGCCTCTTTCATTATACACATACTATCTTCATTCTCGTCTACTTCAATTGAGTATAGAACTCTAATA
>1156 a9ogrp_11693
CCAATCAAGCTGTCCTGACCGAGAGGTCTTGACGCTTCAACCCTTTGTGAACCAAAAAACCTTTCGCTTCGGCAGCAACCCGGTTGGAAACAGCCTGGTGTCAGCCTGCCGTTAGCACCAAACCAAAAACTTGCTTTAGAACTTATGTCTGATAACCAAATTTTCGAATGAAAATTA
>1157 a14igrp_29337
ACGAGTTTTGAAGTGGGATTGATGCTGGCCTCCCGAGGCATGTGCTCGTCCTTGCTCATCCACTCACGAACACCTGTGCACTGTTGAGGTTTGGCCCCCCTTCAATCGGAGCCGTTCCCCCCTNACATACGAGGGGGTCAGCCGGGGTCAAGGCCTTCTACCTCTCACAAACAACTTGTAATGTCTATTCGGAATGTAACGTTTTTANGTCAAATGAAACAATA
>1158 a5d_26561
GTGGATTGATATTGATTTCACGCGTACTGATGCGTTCAGCGTCAGCAACGAGCCAGCGAGATGTGTCGAGTCGATGCGTCCAGCATCGATGAGCGATGAGCAGTAAGATGCTTCCATTAGATGCGTCCAGCATCTATAGGGACACTCACCACTCACACTCACACTCACCACTCACTCGGCACAAATACTCAACATTGACAAGCAGATACATTACATGAG
>1159 a8igrp_23708
CAGTATGTTCTGTAGATCTGGTGTCTTGGATAAGACCGTGGGGATGGAAGCTTTTACCTCCCTAAAGCTGCTCCCCCATGTGGCCCGTTTGGGAATCCAGCACCGCCCAACCTTGCTAATTATTAAAAATCGTTGCCTCGGCGGGTTTGCCTGCCGGCGGATAATTTAAACTCTTTTATTAAACCATAATTATTGCAGCAGTCTGAGCTAAATATTCAATAAATATTA
>116 a9ogrp_13752
CCGAATTGTCAACAAGAGCTGTTGCTGGTCTCCCCAGATGGGGGGCATGTGCACGCTCTGTTAACACATCCACTCACACCCTGTGCACCCTCTGTAGTTCTATGGTTGGGGGGACCTGTCCTCTCCTGCTGTGGTTCTGCATCTTTACATACACACTGTAACAAAGTCTCATGGAATGCATGCTGCGTTTAACGCAATAAAATA
>1160 a20ogrp_24539
ACAAATCGTATAGTTGTGGGGTGTGATTGTGTGTAATAGCACATCACATCGCATCAACATATTAACCCGAACCCGCGCAGCAATGCCGGGCAAGGTGTGTGCGCTCTTTTCTGGGGTTGGGGCCTTTGCGGGTCCTAACCTCTCGGAGCACACGCGGTGAAGGCGATGCGTATCGTTAAGATGCACATCGTCCGATCCACATAGACGCTTGTACATGTTTGACAGAGTTAATTGACACTAAAAATGA
>1161 a19ogrp_27194
CGAAATTCAAAACATCTGTGGGTGTAAAGCGCTACACTTTATGTGTCGCTGGATCCCCAGATATACACCCTTGTGAACGTTTCATGTCTTTTGGCGGCTCTTTTAATATGCTCTGTAAAATGTTAAATGTGTGTGGATATATATATGTATATGTACTACAGATAACGCCAGAGCTGGGCCGCCAGCATTTAACAAACACCCAACATGTTTTAATTCTACTGAAACCAAAAAAGAGAAACAATGAGAAA
>1162 a6igrp_30890
AAAAACGTTGTCTGGGTCAAGAGCAACTCATCAATATCTTCCCTGCGGGTTGAGAATGAATGGGGCACGCCATGTTTGGAATAGCCACGTGGAATGTTATTTTCCCGCGTGCCGATCCCGTTCAGTTGGAACCTTCTTCCCTCGCAAGTCTGAATCCTCGGATTCTAGGCCCGCACTCAATATACTTCAAAACTTTTATCGTCTGAATCTTTTTGTTGTTCTTTTTGAACTCCAATACGAATTATTAAA
>1163 a8i_23219
TTGAATTCACTATCAAAGTTGCTGCTGGCTCCTTGTGGGCATGTGCACGCTTTGAAGTCAATTTCTACCACCTGTGAACCTTTTGTAGTCTTGGGTAACGCTAATAAATCAAAGGAAACTTTGGATTTGAATGATGCAGGCTTTTACAAGTCGGCTTCATTTTACAGTGAAACCCGAGTACTATGCTTTATACACCCCATGTATGTTATAGAATGTAATTCAAGGGCTTTAATGCCTTTAAAGTTAATA
>1164 a7igrp_25167
GCGTTTTCAGCAGCGCGCCGTTGTTTTGTTTTTGGGGTGTGTTTTGGTTTTGGTTTTGCTTTTGGTTTTGCTTTTGGTTTTGCTTTTGGAGTCGTCTTCACTGGAGTTTTCACTGGAGTCTTCACTGGAGTCTTCACTGGAGTCTTCACTGGAGTCTTCACTGGAGTCTTCACTGGAGTCTTCTTTGGAGTCTTCACTGGAGTCTTCTTTGGAGTCTTCACCAAAACGGAGACCAGACCACAAACACAGACCACAACCCACATCCCAAAATTGACTTTAAACCACTTTCTTTGCTTTGATTTCGACTATTCGACTATTCGACTAAACTAAAAA
>1165 a4a_20664
ACAAATCACAGCGCGAGCTGTAAACCTTTGTGAACTGGGCTTTGCGTGCTGCTGTATATTCATTTATTTGGTGCATGCAAAGCTTGTCGGGGCGCGGGCCGCATGCAGTGTACCATAGTCGCTGTTACCCCCACACATTGTATGTATGTATGTATATATGTATGTATTGTGTGCGTGGTGGTGGTGTGCTTCCGTCGTACGCTGCAGTGGCGATTATATATCATCGTCTATGTAGTTTGAGAAATCAAACAAATA
>1166 a4a_11164
TTGAATCCTCAGGATGTCGCTGGCCGCTCCACAAGGGTGGCATGTGCACCCCGCCTTCAACCCACCTGTGCACTTATTGTAGGTCAAAGAGGGAAACCCTTTGCCTATGCTTTTTACACACACTTATTAGTATCAGAATGTAACAAAGTAGACCTTCTGGTCGAAATAACAATA
>1167 a15igrp_26283
CAAAAAATGTCTGGGGTCACACATATGGATTCGTCTGTGTGCAGGGCCCTTGTACACCTCTTTTGCCCGCAAGGGTAATTGTGTCCACCCTTTGTGAAACTTCTAATTTGCTTCGGCAGCGCTCTCAGTGGGTAACACCGCTGGAGGGATAAGGCTGTCAGAAGACCATTTATAAAACTAGTTTGATGAAATGTCATGCAGTCTGATAACACTATTCTTTGAGAAATCAAATTATATTA
>1168 a1l._28156
TTGAATACGATTGGTTACTGATGCTGGCTCTTCACTGAGCATGTGCTCGTGCCGTCTATTTATCTTCTCTTGTGCACATCTTGTAGTCTTGAAAAAAGTGAACCTCTCGCAGCAATGCGGTTTGGGGATGAGCCTTTGTGCTCTTCCTCTGCTTGCTTCTTTCAAGGCTATGTTTTCATATACACTTATAAAGTTACAGAATGTCTTTTAACGATTGTGCTTGTCGCAGTCATTAAACCTATA
>1169 a7ogrp_9944
ACAATTTGATTTCACAATCAATCCACACCTCCTTTTGACACCTTACGGCGGTATTCGCTGCTGCGTCCGCTGCTTCACTGCTGGCGGCGCTTTGCGATGCCGCATATTATTAAAACAACGCCAAACATTTAGTAAAAAAGTATTCTTTTACTATGCGTACTAGTGACGCAAAAAATTTAATA
>117 a2ogrp_12544
CCGAGTTAGGGTTTCGTCCGACGAGCCCGACCTCCCAACCCTTTGTCTATTATACCTTGTCGTTGCTTCGGCGGACCGGTCGCGACCAACTGGTCGGGACCGCCGGGGCCCGTCCCTGGAGAGCGTCCGCCGACGGCCCAACCACAAACTCTTGTACCAAACCATGTCGTCTGAATTACTTGATTAAAATCAAAAACA
>1170 a1ogrp_2178
GCATATGGAGTTGACCACTTGTTGGTCGGCTCCGCAAACCATATATACACTGCGCACATGTAACACACACACCATGCAATAATGAGATGAACGTCTGATTAGAAAAACAAATGA
>1171 a3igrp_14828
CAGAGAGGAGCTCCGCGCTCCAGGGGGTTCGCCCCCGCCTCTCAACCCTGTGAAATCAATACCTTTGTTGCTTTGGCAGGCCTTGGGGTCATGCTCATGCCGGGCTTTCGCCTGGCGAGTGCCTGCCAGAAGCCCATCAAAAACCGTTTAACATGCTGTCAGAGTAAAACATACAAATAAAGCA
>1172 a1b_9661
GTGAATTTTAGGGTGCTCTCTCTGTCTCTTTAACTGGGATTAGAGAAAGGCCTGACCTCCACTTTCTACCCTGTGCACTATTCGGCTTTTGATCAGATACCTTTTATTAGGTTGACGAATGATTGCCTTTTTACTTAAACACTAGTCAAAGAATGTAAAAAATTATAACAAAAGAA
>1173 a2c_3717
CTGAGATAGGGTCTTCCAAGGCCCGACCTCCAACCCAATGTCTACCATACCTCTGTTGCCTCGGCGGGCCGCCGGCGCCCTTTACGGGGCGTCGCCGTCGGCTTTAGGGCTTTCGAGCGCCCGCCGCAGGACCGATTAAACTCTTTTTAAAACAAGTCTTCTGAGTGGGAAATTAAATTTATTA
>1174 a13igrp_9180
CCGAGTTGCAAAACTCCCAAACCCACTGTGAACCAATACCACTGTTGCTTCGGCGGACACGCCCCGGGCGCACCTCCTCAGGGGGTGTGCCCCGGAACCAGGCGCCCGCCGGGGGACCGAAACCTCTGTATCTACCATTCGAGTACTCTGAGTGTGATTTACAAAATCAAAATTA
>1175 a9igrp_659
CTGAATGGCCTCTGGGCCTTCTACCTTGCAAACCTGTGGAAGCAACATGTGCTTCGGCGCTTCGGCGTCGCTTTTATGCTGCTATAAGCCTATGTGTCTGAATCAAATACAAGAAATA
>1176 a8ogrp_27481
AAGAGTAAGGGTGCTCAGCGCCCGACCTCCAACCCTTTGTTGTTAAAACTACCTTGTTGCTTTGGCGGGACCGCTCGGTCTCGAGCCGCTGGGGATTCGTCCCAGGCGAGCGCCCGCCAGAGTTAAACCAAACTCTTGTTATTTAACCGGTCGTCTGAGTTAAAATTTTGAATAAATCA
>1177 a18igrp_1056
AAGAGTTGCAAAACTCCCTTAAACCATCGCGAACGTTACCCCATAACCGTTGCTTCGGCGGGCAGGCCAACCCCTCACGGGGCGTCTCCCCGGCCCCCTCGTGGGGCGGCTCGCCGGAGCGGCACAACCAAACTACTTATAATTATTGGCCTCTCTGAGTAAGATTTTAAATTAAAGTCA
>1178 a8i_26324
CAAATCCATCGCGTCTCTACCCGAGACACCGTCTAAACGTTCCGGGGCTGAGAAGCCGCAAGGACATCATCTTCACGGTGCATGTCTGGCTTCTCGGCACCCACCCCCCTTTATTAAACCCTAGTGTGACTGTTGCTTCATATGTATTGCTCATTGTTGAACACAAACAACAAAAAA
>1179 a4k_9558
GTGGATTTGTAGCCTCACAAAGGCTCACATTCTCTATCCTTTACACACCTGTGCACCCTTCTGAGGCGGAGAGTTATTAGGCATTAGCCGAGCGCCTCCCTTCGGTTATTATATCAACCTCAAACTATGTTTACTAGAATGTATACCGTCTTGTTGTAACGACAAGTACAATCCAATA
>118 a8ogrp_948
CAGAGAACATCGCCCTCACGGGTGACTCTCCAACCCTATGTTATTATACCTTTGTTGCTTTGGCGAGCCGCTTCGGCCACCGACTCCGGTTGGTGCGTGCTCGCCAGAGGACCACAAACTCTTGTTTATTAGTGTCGTCTGAGTACTATATAATAGTTA
>1180 a15igrp_5577
AAGTATTAGAGAAGGTTTTGATGCCAGTGGTTTTGCGACCGCAAGTGCTCGCCTTCAACAATCTTATCCATACACCTGTGAACTATTGCAAGTGAGAGGAGAAATCTTCTTGCTTGTTATACACATAAACTCGTTAATTTGATGAATATATCAAGTCGAAAGACCTATAATATCTAAAA
>1181 a2b_14051
TTGAAACAACATGGTGGTTGGCTGTCGCTGGCCTTTCGAGGCATGTGCACGCCTTCAACCGAAATCCTTTTCACCCCTTGTGCACCTTCGCGTGGGTCCCCTCGGGTTTTGCGACCCGTCGTGGGCTTGCGCTTTTCTACACACCCAGATGAATGTCAGAAGAATGTCATTGTACAGTAATTATGTACCAAGTA
>1182 a17igrp_10064
GCGAGGTTTTCCGGGCCTTTTTGGCCCGATACCCGTCCATGTCATGTGCACCGATTTGCTTCGGCGGAGGGTTGTGGGGAGAGGAAAACATGGCGGCCTCAGGGTCACGTGACCTCTCCCGACGGCCGCCGTCGGCCCTTTTCAAAACACTTGCGGATTTATGAAGTCTGATTGTCAAAAAACGAAATGAAGCA
>1183 a2ogrp_8736
TTGAAACAAGGGGTCGCTCCGGGGAGCCCTGCGCCGGCGGAGACGTCGTGCTGCGGGCCCCCGTTCGGCTCCGTCCACCCTCACACCCCTGTGCACCTTTGGGAGGGCGGGCCTCTGTGCCCGTCGGCCCGCTTTACAAACTCTTGTAACGTATTTTGAATGTCATCGCGGACCCGATCCGCTCAAACAGTAA
>1184 a1igrp_2413
CCGAGAGGGGCTCCGCGCCCCAGGTGGCTTCGGCCACCGCATCTCAACCCCGTGGCTATGTTCCAGATCGGAAGATCGGTACAAAGTACGTTGCTTCGGTGGGGGAAAGCCCCCGCCGGCCGCCCATCAAAACTCTTTTATTGGTGCAGTCTGAGTACAAATCATAATAAAGAA
>1185 a1c_5460
CCGAGTTTTCAACTCCCAAACCCACTGTGAACTTATACCTTTATCGTTGCTTCGGCGGGTCTCGGCCCCGGCGCTGCCGCTCCCCTTGCCGGGAGGGGTAAGCCGGACAACACGGCCCCCGCCGGAGGACCCAAACTCTTGAATTTTTCCGCGGACTGGCTTCGCGGCAGTTTGTATTCTGATTACTTCAAAACAAAATGAATCA
>1186 a8c_28066
ATGAAATTATAATCCGGCGAGGGGAAAGGCGGAGAGTTGTAGCTGGCCTCCAGGGGCATGTGCACGCTGTCTTCCCGACCTTTCGCCGTATGGGCGCGGGGCGACCCGCGTCTTCATATACCCCTTCGTGTAGAAAGTCTTTGAATGTTATACGATCATCGAGTCGCGACTTCTAGGAGACGCGATTCTTTGAGACAAAAGTTATTA
>1187 a1igrp_26984
CAAATCCACACGTCTCTCTCTCTCTCTCTTCCGAGACACCGTTGAATTCTCTTGCGTGTCCATTCAGTCAGTCAGTCAGTCAGTCAGTCGGCTTTTGTGTCATCCTCGGGGATGGCCGGTCAGCTGGCAGGCAGGCAGGCAGGCTGGGTGCCGCAACACCCTTATCAAACTTTTACAACCTTCTTGTACCAACCTAAACATCCATATA
>1188 a14igrp_5967
TCGTATCTCTGACGTGGCGGGTCGGCCCTGCTCGGGTTCCGAAAGGGCCTTTGCAGCGGGTCGCCCGTCGCGCTCAACCTTCACAAACCCCTGTGCACCTTTACGGCGGAGGGTGGTGGCGAGAGCCCCGTCCGATGCCGCATAACACAAACACTCGTATAAAAAGAATGATCAGTGGCCTCTGTGCCGCCTAAAAACATAA
>1189 a2j_32389
ACGTATATGCAATTCATTGCATGTAACATTTTGCACCCATCAATCGTCGCATCGACGTGCGGACTCGCGCGGGTGAAACCGCCGTCCGTCGACCGTGCGCGGCGCGGCGACCTGCCTGCCTGCCTCTCGGCGGTGGCCGGTCGTCGATACGCATCGCTATCTGCGCTGACGCGTGCAGTCTCAATATCCGGGTACCTGTTGCAGCCGGCCGTATTTTGGCGAGGTTTAATGAATCGTCGTCGGTCGCCCGGGCGCGCGTCGCGTAGCATTCTTCTCTTAACCGTTATCAAACTTTACTGTTACCGGCTGTTAGCGTCGGACGAGCCCTACCGGATGCCTCCGGTCGAGCGCTCGACCGATCGCGAAAGCTCTAAACATTAAACATGA
>119 a4j_17561
TTGAATGAATGTAGAGTCGGTTGTCGCTGGTCCTTTCGGGGGCATGTGCACGCCTTCTCTTTCATCCACACACACCTGTGCACTTGTGAGACGGAAGCCCTCGGGCGTCCGTCTGCTCTATATAAACTCATATCTATAATTTGAATGTAATTGATGTAACACATCTTTAAAC
>1190 a2c_29766
CAGAATACTCAGTCGGGGGCCGACTTGTCGGTTCCCGAGTGATATTACACCCCTATGTGAACTTTATTTGTATATTTCTTAGACGGACGTTTTCCCGAAAGGGGGAATTTCCTAAAGGGGGATATTTACACACACCTTTATATTTTATTTCTAGAGTCTCCGAGCGATTCTTATTGAGAAACGCGTTTTTTAAATAATTAAAAA
>1191 a16igrp_20432
ATGAATTAATTGACGGGGTTGTCGCTGGCCTTAGCAGGCATGTGCACGCTCTGATCAAATCTATCCATTTCTTACACCTCTGTGCACTTATCATAGGCTGGCTTATCTTAAAGGGTTGTTTGCGCAACCTGGGCCTTTCTATGCATTTTATACATACCTATCTGTCTTTGAATGTCTTCATTGCGAATAAAACGCATTTAAATA
>1192 a20igrp_18399
AAGAATACAGGCCTTCGGGCGCTATTCTCATACCCTGTGTACCTCTACCACGTTGCTTCGGCAGCTCTGTTGGGTAGCGGCAGCGCACAGACGGCGAGCATGACACACCGAGCTTGTGGCCTCTCTGCGCTGTGGCAGCCTGATAACTGCCAGAAGACCCGAAAAACTCTAGAATCACTGATGTCTGAGTACTATACAATAGTT
>1193 a14ogrp_21382
ACGTATCTCAGGCGGCCGTCCGAGGGCCCTGCTCCGACCGTGAGGCCGTGCAGCGGGCTTTCGGAGACGCCCAACCTTCACAAACCCACCGTGCACCTTTGCGGGAGAGGCTCCCCGGGCGAGAGCCCGGTCGGCCGAACCCGCTCCAAACAAACGCTAAGTCGATAGAATGTGATGCGGCCTTTGTGTCGCCTAATGACATGA
>1194 a9l_11856
CAAATCACGGATTTGGTGGTTGGGGGTGGAGAAAGGGGGAGAGGTTGAGAGGAGTAGGTTGGTGAATTTCGGTTCATCAGCTCGTTTCTTCAATCCCTCTATCCCCTCCCTCCCTCCTCCGAACGTTTACGCTTGATTGTTTGACAGAGTTTAGAATGATGAAATTTAGA
>1195 a1ogrp_26503
CCGGTGACTGAAGCTATAAATTAGCCAAAGTCTTCAAAAACCAGTGAACGACCTAGCCTAAAAGCAAAAGTCGTTCACATCCACACCGTGTTGTTGAACTGTGCCTTTGGCGTTTGATAGATAGTTCAGGTGAGTTGAGTGTGGGTTTTCTCACAGTCAACTGGCTAGAGCTGTCTGAGGGCGCCGAAAGCAACCTTATATAAAACTTTGATAACATTTAATACTGATCTTACTTTCGGTGGGTTAAACCACCAAATTTAATCAATA
>1196 a19igrp_26200
ACGAATTGTAATGGGGGTTGATGCTGGCAAGCTAATCTTTTGGCTGCATGTGCTCGCCTCCAACAATCTTTATCCACACACCTGTGCACCTGAGGGTTTTTCGAGTAGAGATTACCATCTGGTCATCTTTCTTGGATATTCCCTCTTTACATACGCTGGTTACAATGTTGAACGTGCTCGTGCCGATATGGCCGTAATAAAATA
>1197 a4a_25309
TCGAATAAACTTGAGCAGGCTGTTTTGCTGGCCCTTGAAAGAGGGTATGTGCACGCTTGTCCATCTTTGTCATTCTTCCAAACTGTGCACACACTGTAGACCCTGGGGGAGTAGTATTTATGAATGAGTCTTCATTCGAGTTGGGGACTGCTGTGCTTTCAAGCCGGCTTTCCCTTGTATTTTTCCAGGTCTATGTCATTTTTTCACAACCTCTATAACATGTTTAGAATGTTGAATCAAGGTCTTTGTACCTATATAAAAAGTTAATA
>1198 a9ogrp_21841
CTGATTTCCAAACCAAAAGGGTTGGGTTTGCTGTGAGAGCAGTCTCCTGCTTCTCCGGCGCCTTCCCTTTTACCACCCCTTGTGCAACCTAGCAACATATACTTTATGAATTCTCTCTTCCTCTTTGCCAACTCATCTTTCTGTGGATCTCCGCAGACAAAGGGAAGGCTAGAGGAAGGCGAGATTCATAACCAATTTATCAAACCCTTTATAGTATTCTGCCTGAATTGTTTTGTAACTTGATTTACAATCAATAATAACATAAAA
>1199 a13igrp_19844
ACAAAAGAGTGTGTGTTGAGTGAGTGTGTGAGGGGGCTGTGTGTTGTGGGGAGGAGCTGTGGTGTGGGTTGGGGGCTGTGGAGAGGGGATGCTCTCTCTTGGCTCTTATGCCTGCTGCTGCTGCTGGCTACTACTGTGCGTCATACTCTCTCTCGCTCATTTCATATACACATATTTGACCCGGACACAAGCGATGGTGGAAACGCCAATGGCTGGTCCGATACATTCACGCTTGTTTGTATGACAGAGTTATCATGTGACATGAAGTATAATA
>12 a8ogrp_9223
ATGAACCTTTGAGAGTTGAGCTGGCGATTTACTTTGCATGTGCTTGCTCTCTCATCCTTTATACACCTGTGCACCTTTTGAGGGGATAGTAGATGTACCTATGGTATGTCGAGATCCCCTCTAACACATACACTTTATTTATTATCGAATGTTCAAACGCTTAACAGCATTTAAATA
>120 a1ogrp_341
ACAAATCTCTACATACGGTCCCATGCATGCGTGCGTGGGAATCGACACACGAAGACAGTTGACGAACATATGGACGACATGAAA
>1200 a3ogrp_25675
TTGAATTCACTATGCGAAGCTCGTGCTGGCTCCTTCGGGGGCATGTGCACGCTTAGCAAAAGTCATTTCAACCACCTGTGAACCTTTTGTAGTCCTTGGGTGACGCTACTTTCAAAGGAGACTTTGGATTTGAATGCTGCAGGCTTTCTGTAACAGGAAGGTCGGCTTTATTCTACAGCAGAGCCCGGGTCTATGCATTTACACACCCTATTGTATGTTTTTGAATGTAATTGAAGGGCTTAAATGCCTTTAAATCTATA
>1201 a2ogrp_1306
CAGTGAGAGGGAGCGTGGTAGAGGGTTTGTTGGAATGTAGACAAGAACAAAGACAAATTACAATTACGTACAATTACTATGACTTGCCGCCTTGGATCTCTGGGCTCTTGTGTCGATGAAGAACGCAGCAAAGCGCGAAACGTGTCATGACGTGCCGTCTTGCGAATGACGACTCTTTGAACGCACCCTGTACAAGTGTATATTCCCTCGAGCGCGCACACTGCTTGCACATGGCCGCAGCGAGAACGCGCGGGCGAAAAGAATATGTGGGTGCAACGGGTACGGTGTCCTGGAAGAAACGTTAGGACGCCGTGCACGAACCCCCACACTTAATCCATTGTGCATCGGGGGAATAAGAAGACCCGCTGAACTTAAGCATATCAATAAGCGGAGG
>1202 a5k_26516
ACGTAAAATGTGAGAAATTGCATTTAACTTGAGTACAGGTGCCTCTCGATATCGTCGCTTTTGTTGCTGTTGCGGGTGAAACCGCGACTGGCGACGGAGCGGCGCGGCGACGCGTCGTATATAGTCGTCGATACGTAACCATAACTGCAAAGCGTGCGCAGCCGTAATATCCGGGTACCTTTCGAAGCCGGCCGTATTTGGCGAGGTTTAAAGAATCGTCGTCGGTCGCCCGGGCGCACGCCGCGCAAACATTCTCTCTTAACATCATCATTATGATAAGATAAATGTAACGGCTCGAACGACAGCGGCGCCCGATCGGATGCCTCCGGTCGAGCGCGCCTCTGCTCGGGAAAGCTTAACAAATAAAAACAAGA
>1203 a9c_29933
TCGAAAAATGCTTCATTGCATGTAACCTAACTTGGCAGCCTCTCGAGTAACCGTCGCATCGATCTCGGGAGCGGGTGAAACCGTTTCGGGGACGAAGCGGCGCGGCGACGCGTCGATTATGGTCGTCGATACGCATACTATGCACATCAGGCGTGCGCAGTCGTAATATCCGGGTACCTTTGCAGCCGGCCGTATTTGGCGAGGTTTAATGAATCGTCGTCGGTCGCCCGGGCGCACGCCGTGCAACAATTCCTTTAACCATATCATAACAAACTGTTACGAGATAGCCGACGCGTCGGACGTGCCCGGCCGGATGCCTCCGGTCGAGCGCGCGTTCGAACGCCCAGGCTTGACAACAAAAACAGATAACCTTGGCGTGGATCACTCGGACTCGTGTGT…
>1204 a10ogrp_21475
GCGTTTTCAGCAGCGCGCCGTTGTTTTGTTTTTGGGGTGTTGGTGTTGTGTTTGGTTTTGTGTTTGGTTTTGTGTTGTTGGTCTGCACTGGAGTCTTTCTCGGAGTCTTCACTGTGGTCTTCACTGGAGTCTGCACTGTGGTCTAGTCTTCTCCAAAACGGGACCAGACCACAGCACAACCACAGACCAAAACAGAAACCACATCCCAAAATTGACTTTAAACCACTTTCTTTGCTTTGATTTCGACTAAACTAAA
>1205 a1igrp_27782
CCGGTGACTGAAGCTATAAATTAGCGGAAGTCTTTAAAAACCCAGTGTTCGACCTAGCCCTTAAAGCAAAGGTCGTTCACTATCCACACCGTGTTGTTGAACTGTGCCTTTGGCGTTTGCTAGAGAGTTCAAGTGAAATGAGTGTGGGTATGTCCAGGTGCTTTGGTGCCTGGTCGTGTCTCACTCGGTCGCTGGAATTGTCTGGCGGCGCCGAAAGCAACCTTATATAAAAACTTTGATAACATTTAATACTGATCTTACTTTCGGTGGGTTAAACCACCAAATTTAATTAATA
>1206 a1igrp_30310
AGGAAAAACAAAGTCTGTCGAAAGCAGGTCCGGTTAATCCGACACCTTGTGCAATAATATCTGTCTCTGGCGCCGCTGCTCTCTCACTTTCACGGTGAGTAATGGGGTTCTCAGAAGAAACCTTTCGGGATTTGTTCTCGGAAAGTTGAACACTGGGGGCTCTATTTCCCACTCCCTCCTGATGGGGGGAGTGTGTGTGCGCATGTGCGGCGCCGAAGCGTTGAATAACGACATTCTATCTTATTTCTTGAAGTCTTATGATGAACGCCTTTCCTC
>1207 a7igrp_28418
CCGAACTTTAGCTTTGTGATAAAGCTGACCCCGCAAGGGTGACGCTAGTCGGCCTCAAGGCATCAAGGCTTTGGTCGCACGATAGGAACCCGCGGTGCGATTGGATTCGTGGTATCTTAAATGAGGCCACTTCCGATTTGGGATGCCCTCTGTGGAGGATTGCCCGCACCGTCTGTCAAGGACGCCCGTGGACTTGTCTCTGCGCGAGCAGGTGGAGTCCGCGTGCCTTGGCGCCCCGAGTACCGGTCCGCGGTCCCCGAGACGGAGTTGGCTCTTGTGAAGGCTCTCACGAGCTGGATCACTACGCACGGATTCTCCCAGGAC
>1208 a1igrp_28866
TTGAATACGATTGGTACTGATGCTGGCTCTTTCACAGAGCATGTGCTCGTCCATCTATTTATCTTCTCTTGTGCACATCTTGTAGTCTTGAATGAAACCTCTCGCAGTCAATGCGGTTTGGGAGTTTGTTAACCCTTCTCCTGCTTCTTCAAGGCTATGTTTTCATATACACTATAAAGTTACAGAATGTCTTTTAAAGGCTTGCGCTTGTCGCAGTCATTAAACCTATA
>1209 a8l_17872
CCAATCCACCTTTACAAACCACTGTGAACCGTTCCTGTCCTTGGGTGGCAGGAGGATGCACTTTCAGTGTGTCTAATCGCCACCCAAACTTTTTCAAACCACTTATATTAACCTCTCCTGTTGAAACCTTCTTTGCGGCTATCTTATGGCCCAAAGATCAAAATAAACAAATA
>121 a9l_16976
CAGTGTTCGCTGCCCTCCGGGGTAGCAAACCTCACCCTTGTGTATTATATCTTTGTTGCTTTGGCACGCCGCCCCCGGGCGCTGGCTCCGGCTGGCTAGTGCGTGTCAAAGGACCCCAAACTCTGAATGTTAGTGTCGTCTGAGTACTATCTAATAGTTA
>1210 a2b_15190
CCGAGTTTACAAACTCCCAAACCCCTGTGAACTTATACCTTTACGTTGCTTCGGCGGGACTCGCCCCGGCTGCCCTCGCGGCGGACCGGACCCAGGCGCCCGCCGGAGGACCCAAACTCTTCTGTCTTTTATAGCGGCATGTCTGAGTGGATTTTTATACAAATGAATCA
>1211 a8ogrp_22726
CCACATTTTGTGTTTTGGGTGCATTCTCGTGCATCCGGAACACAAAAACAATCTATACAAAACTATACCAATCATGTGTGAAGCAAAAGAAATTGATCTTGGTGGCTTTTGAACTCTTGAGGGAAAAAGCCGCCCAATTTTTGTAACAAACAAACTCTTTCTAAACGAACACTAAACCAAACTTTTTCAGTCTTTTTCTTTATTGTAAAAAGGCCACAAACCAAATGAGATA
>1212 a3ogrp_11980
GTGATTTGGCCGAGAGGCCGTTATCCAATCCTCACACCTGTGAACTTGTCGGTGGGCTCAGCCCTCCGGACACACAAACTATTTGTAATGAACGTCTTATATAACATGAAACA
>1213 a14ogrp_27067
ACAAATCATGAGCGAAAGCTCAAAAACCTTTGTGAATAGGCTTGTCTTTAGCAATAGAGACAAGTTCGTTGGGTCGAGGGGAGCGAAGAGTAGGTTAACGAGGCTAGTTTACACTAACCAAAGTTAACTAAGTGAATGACTACTTCTAACTGCGGTTAGACTTAGGCTTCCGCTCTAAGCATTATTATAGTCTAATTATAGTTGGATTTCGAAAGATTTCTAAAAACTAATA
>1214 a3igrp_32397
ATGAACAAGTACGTGCGGGGGGAGGGTTGTGCTGGCGCGTCCGCGCGCACGTGCACGCCCGCCCCTCGTCGTCCGTCCACTCACACCTGTGCACCTTGCTCGTCAGGCCGAGGGGCCCTCCCTTGGCCGACGCACTTTTCACACAACCTGTCTTAACCGGATGTCAACTTGCGTAAACGCAACCGAAAAA
>1215 a19ogrp_18835
GAGATTGGCCACCCGGCCGTGAAGCACACACACACACACACACCGTGAACAGCACCGTTCCCCTGCCTCTCGGGGCTTGGGACCATCCACCTAAACAAATAGTCGTCTGAACGTAAATTGTCGTAACAAAAACA
>1216 a8i_2110
CCGAAGTACAGGCCCTTTTATAGGGCTACACTTCCACCCTTTGTTTACCATACTATGTTGCTTTGGCGAGACGTCTTCGGACCACCGGCTCCCGGGCTGGTGCGCGCTCGCCAGAGAAAACCCAAACCCAAACCATTTTAAGTGTCGTCTGAAAAACAAGTTTAATTATTA
>1217 a2igrp_19673
GTGAATATCCGGGCCTCTGGCCTGAACACCAAACCTCTGTGAACTGTGGCCCTCGGGCCTTTTACAAACATCTGTGTGAAGAACGTGAACTATTGTAACAAAACA
>1218 a1igrp_13979
CCGAGTTTTCAACTCCCAAACCCCTGTGAACATACCTCGACGTTGCTTCGGCGGGACCGCCCCGGTCGCCCCTCGCGGGCGGACCGGAACCAGGCGCCCGCCGGAGGACCACAAACTCTTGTTTAAATAGCGGCATTGCTCTGAGTAACAAACAAAAATAAATTA
>1219 a9ogrp_13996
TCAATTTTACAGTCCTGGGATGGGGGTGAAAACTCCCTGAACAGCCTGTTCAACCCTTTGTCTTTTGCGTACTGTATGTTTCCTCGGCGGGTCCGCCCGCCGATAGGACACTTCAAAACCTTTTGTAATTGCAATCAGCGTCAGAAAAACTATAATAGTTA
>122 a4j_461
CAAATCTTTTGCGAGAACTGTGTGCTGCTTGCAGTGTGCAGTGACTTGCAACATTAGCACAGGGTCGCAAGACTCTGATGTTTACGCTTGTTTGTTTGACAGAGTTAGTTGAGAATAAATAAAGA
>1220 a4k_4627
AAGAGTATAGGGGCTTCTTGCCCACTACTCCACCCTTTGTTTACATACCATTGTTGCTTTGGCAGGCCCGTCGCAAGACAACCGGCTTTGGCTGGTCAGTGCCTGCCAGAGGACCTAAAACTCTTGTTTAATCATATTGTCTGAGTACTATATAATAGTTA
>1221 a5i_17939
CTGAGTGAGGGCTCCGGCCCGACCTCCAACCCTTTGTGAACACAACTTGTTGCTTCGGGGGCGACCCTGCCGTCATCTGGCGACGGGCGCCCCCGGAGGCCCCCCAACACTGCATCTTTGCGTCGGAGTCAAAGTTAATTAAACA
>1222 a8ogrp_4516
CATGATATAAAAGTAGGGTGAGGATACGCATCTGTGAGGAGCCCTACTACTATATTCCACCCATGACTTTGTAGAACCTTTCCCTATTTCCCTGGCTTTTAGCCTCTGCGCACGCAGTTGCAAAGAAACCAGGGGCGTAAGGCCATTTTAAACCATTTGAAGTTGCAGTCACTATCAGTAACCTAATCAATTA
>1223 a2c_13922
TAGTATATCTATGAGTCAGGATGTAGGGTACCTATTAGTGGTGAAAGCCTCTTTTAAGTGCCCTCCCCGCTAAACCTTGTAAATTTAACTTTAATTAGTTCCCTTGGTAGGCGTGACTGCCTGTGGATAAAAATTTAAACTCTTTAATAAATTGGCTGAAAATAGTGTAACTGTCTGAAATAATGTTAATATTA
>1224 a9c_19773
CAGAGTTTTTAACTCCTAAAACCATGTGAACTTACCACTGTTTCCTCGGTGGAAGGTACCCGAAAGGGTGCTGGAAGCCGATGGACATCTAAACTCTTGTTAACTTTGTTAATTCTGAATCAAACTAAGAAATAAGTTA
>1225 a3ogrp_23036
CCGAGTGTCGGGCCCTCTGGGTCCACCCTCCCACCCGTGTCTACCGTCCCTTGTTGCTTCGGCGGGCCCGCCCTTCGGGGCTGCCGGGGGGCCTCGCGCCCCCGGGTTCCGCGCCCGCCGGAGACATCCACGCGAACACTGTGTGAAGGTTGCCGTCTGAGTGGATTTATCCAATCGTTA
>1226 a11igrp_12778
ATGAATTTAAGGACTCTCTTTTTAGAGGTCCGACCATTTCATTTCCTTACACTGTGCACACACTTCTTTTCACACTTTTAACACTATAGTATAAGAATGTGATAGTCTCTTAATTGAGCATAAATAAAAATA
>1227 a4a_10428
CAAGTGAGGCTACCGAACGTTGGAAACAGCGGTTAGGAGCTTACACCCACCCGTGTCTACATACTATTGTTGCTTTGGCGGGCCGTGGCCTCCACTGCGGGCTCTGCTCGTGTGTGCCCGCCAGAGAACCAAACTCTGAATGTTAGTGATGTCTGAGTACTATCTAATAGTTA
>1228 a13igrp_10668
GAGAACCGCCGGCGCAAGCCGGTTCTACCCCACACACACCTGTGAACCGTTATCTGGACGGGATTAGCCCCCGGGTGAAACCGTCCTCTCACAAAACGTCTTATAATGTCATGAACGTAGTCTTATTTTAACAAATA
>1229 a4k_5078
CCGAAGTACAGGCCCTTTTATAGGGCTACACTTCCACCCTTTGTTTACTATTCTTTGTTGCTTTGGCGAGACGTCTTCGGACCACCGGCCCCCGGGCTGGTGCGCGCTCGCCAGAGGAAAATCAAACCCAAACCATTTTTAGTGTCGTCTGAAAAACAAGTTTAATTATTA
>123 a20igrp_4048
CAAATCTTTGGAGGCTGGCTGCTGTGAATAACAGTGTGCTGGTTTCACATTAGCACAGGGTCGCAAGGCCCTGATGTTTACGCTTGTTTGTTTGACAGAGTTAGTTGAGAATAAATATAGA
>1230 a9l_2792
ATAATTTGGAATGGCGCGAGCCGTTTGCACAAATTGTGAATCAAGGCCGTCCTTTGGGTGATTGTGGACGCGAGTCCGCGGCACCCGACAACAACTCGAAAACAACTAGCCAACGAACCTAAATCAATAAAAA
>1231 a9c_17997
CAGAGTTTAACGACTCCCAAACCACCGTGAACGTACCCGTACCGTTGCCTCGGCGGGCGGCCCCAGGGCGGGGCCGCAGCCTTCCCTCGCGGGAGGCGCCCGCCGCAGGTTACAGAACCATTTGAATATTTAGTGGCATCTCTGAGTAAACTTCCAAACAATCA
>1232 a2ogrp_5444
ACAAATCATGGTATCGAAAGATACACATTAACCCGGCCGCAAGGCCAGGTCAATTGGACCTGGATGGGTAAGGGCATTATTGCTCTCCCCTGAAGGGTCCGAACATTCATGCTTATTGTTTGACTGAATCACATATGTATATAAATTGA
>1233 a11igrp_3917
CAGGAACTCGCAAGAACTCCTAACCCACTGTGAACCTACCCGACGTTGCCTCGGCGGGCGCCCGGCCTCGCGCCGGGCACCAAGCCCGCCGGCGGCCCCCTACTCTGTCTCTGCAGCGTTGTGTCTCCGAGTATACCAAAACAAGTCA
>1234 a2j_5015
CAAGAGAAAAGCGTCAGCTTTATTTTTACTTTTTAACTTGATGGTTGGGCAAGCCCAACCCGGAGGTTAAAGAAGCAACAATGATACAACGCTCACCATTGACAAAATTAGGTTAACAGTAG
>1235 a2ogrp_5679
AAGAGATAGGGCGGAAACGCCCGACCTCCAACCCCATGTTGTCCGACTGCGTTGCCTCGGGGGCGACCCCGCCCCCGGTGGACATACCAACCCGTCCTTCCTGCCGTCCGAGCAATTTTTAATAAAACA
>1236 a9l_13344
CCAGAGATGGCGGGCCCCCGCGCCCCCGTCCCCAACCCTTTGTTGACCAAACCACTTTTGCCTCGGGGGCAGAGCGGCCTCCGCCGCCCCCGGTGGACCATTTAACCCTGTCTCTGTACGTCGGAGTCTTTGATAAATGAAATAAA
>1237 a5k_10684
ACAAAATGATAAAAGTCAGGGGTAATATCCTGGCTTTTATAAACACCTGTGAACTGTAATTGTATCTGGTGGGGAAAGCAAGAGGTTACTCCTGTTGAACCCACTTTTAAATTTGAACTCGTACATCTTGAATTAGTTTTAATCTAAATAATTTAAAA
>1238 a1igrp_10930
TTGAAATCCAAATTGGTTGGTGTCCTGGTGCCGAAAGGATCAGGCCCTTCCATCATCACATACACCTTTGTCGAACTGTAGGGGGATTGGTTAACACCTATCTCCTGCCTTTTCATACTCTTGAAGTTTAAGAATGAAGTTTTGGTTAAAACCAAAAATA
>1239 a4ogrp_21902
TTGAAACTTCATCCGGGGCGCCGCGGCCCTCAGCACCGGTGGAAACGCCGTGATGCGGGGACCGCGCGTGCACTCGTCCAAACCAAACCCCTGTGAACCTTACGGGATGGCCCGGGTTAGCGCCCGGTGCCGTTCCGCTTTATACAAACACTTATAAAAGAATGAACTGAAGGCGGTCTGACCGCTGGATAACAAACTGAAA
>124 a4a_3772
GTGAATACAAACGCTTGGGTGTCTCTGCCTTCGGGCAAGCCCCTCGCACCCTTCACATCCATAACACCCGTGCACTGTAAGATGACTCTCTGGGCTTCGGTCCTTGGGTCGTCTGACCTTTTTCACAAACAATTATATGTAACAAATGTAGTCTTATTATAACAAAATA
>1240 a13ogrp_8227
GTGAATCGGCCCTCTGTGGCCTTCATCAAATCCTCACACCTCTGTGAACTGTTGGGCCTCGGCCCACTTTTATAAACTTTTGTCGTCATGAACGTATGTAATACAAAACAAAACA
>1241 a11ogrp_2820
CAGAGTTGCAAAACTCCCAACCATTGTGAACCTACCTCACCGTTGCTTCGGCGGGTGGCCTGGGGCAACCCAGGCCGCGTCGGCTCCCCTCGCGGAGCTGGCAGCCCGTCAGAGGCCCCTAAACTCTTGCATATTGGCCTCTCTGAGTAACTTATACAATAAGTCA
>1242 a4a_19718
TAGATTCTTTCAGCTGTGCGCCGCGAGGCTGCACGCTGAAATCCAATCACACACACCCGTGCACTTCGGTCGTGGTAAAACGCGGCCGCCTTCACATTTAACAAGTAAAACCTGAATGTAAAAACCATAACATAATA
>1243 a13ogrp_7865
ATGAAATGCAAGGATGCTCTTTTTAGAGGTCCGACCCAATTCATTCCTTCACACTGTGCACACACTACTTTTCACACCTTTTAAACACAATAAGAATAAGAATGTCATTGTCTCTTAATTGAGCATAAACTATTA
>1244 a14ogrp_14921
TAGAGTCTCTGAACTCCCAAACCTTTGTGAACATACCACTGTTGCTTCGGCGGGATCGCCCCGGGCGCGCCTCTGGGCGTGTTCCGGATCCAAGGCGCCCGCCGAGGGTATCAAACTCTTGCTTTTATAGCGGACTTCTGAGTATTAAACAAAATAAATTA
>1245 a16igrp_15064
CCGAGTTAGGGTCCCCTGGGCCCGATCTCCCACCCTCTGTCTACCTACCTCATGTTGCTTTGGCGGGCCGTTGGGCCTGGCCCACCGTCGGCTTCGGCTGGCGCGCGCCCGCCAGAGACCCCCCTAAACTCTTGTTTATCAGTGTCGTCTGAGTACTATGCAAATAGTTA
>1246 a10igrp_2274
CAGAGTTCATGCCCTTCGGGGTAGACCTCCCACCCTTGTGTATTTATACCTTTGTTGCTTTGGCAGGCCGCCGGGCTCGTCCCGGCTACCGGCTTCGGCTGGTGCGTGCCTGCCAGAGGACCCCAAACTCTGAATGTTAGTGTCGTCTGAGTACTATATAATAGTTA
>1247 a5i_9825
CCGAGTGCGGGCGCCCCGGCGCCCGACCTCCCAACCCTTTGATTATTCAAGACCTCCTTCTGCCTCGGGGGCGACCCGGACCTCGCGCCCGCGGTCCCCCCGGTGGTACAACCAAACCCTGCATCAATTGTCGTCTGAGCGGAAAGCAAATATAAACA
>1248 a18igrp_4394
CAGAGTTCATGCCCTTCGGGGTAGATCTCCCACCCTTGTATATTTATACCTTTGTTGCTTTGGCAGGCCGCTGGGCTCGCGCCTGGCTACCGGCTCCGGCTGGTAAGTGCTTGCCAGAGGAAATCAAACTCTGAATGTTAGTGTCGTCTGAGTACTATATAATAGTTA
>1249 a14igrp_1388
CTGAGTGAGGGCCCTCGTGGTCCGACCTCCAACCCTTTGTCGTCCGACTCTGTTGCCTCGGGGGCGTCCCCGGCGTTCGCGCCAGGGGCCCCCGGCGGTCCACACAACTCTGCATCTTTGCGTCTGAGTAAACATTAAATGAAACA
>125 a2ogrp_3719
CTGGGTTTCGGACCTCGTGTCCACTCACCCGCCCTTTGTCATATACAAACATACATCGTTTCGGCTCCTGGTTCTCAGGCACCCCCGCTATTAACTTAGCGGGGTACTGCCCGTTAGCCGCGGGTCGGCATTGCAAACCCACATGGATTACTGAAGTCTGATACAATTTTTTAAACGAAATTA
>1250 a3igrp_19864
GTGAATAATGGGGACTCTTAATTGGGCCCCGCCTTCTCACTTACCATACACCAGTGCAATGTCTTGGGTCGATGAAAGCCGCTCCGGCGGTGACTAGTCTTCCCTCCTTTACATTTCAAAACCAAGTCATCAGAATGTGAAACTATTTAACAAAATA
>1251 a3igrp_15338
CCGAGTTTACAACTCCCCAACCCCTGTGAACATACCTACGTTGCTTCGGCGGCCTCGCCCCGGCGCCCTCGGGCCCGGACCCAGGCGTCCGCCGGAGAACCCCAAACCTCTGTTTCTACGAGTATCTTCTGAGTAAACAAGCAAATAAATCA
>1252 a8i_7654
CTGAGTTACTAAACTCCCAAACCCGTGTGAACCTACCACTGTTGCTTCGGCGGCCACGCCCCGGGAGCCCTGTGCTCCCGGACCCAGGCGTCCGCCGGAGGACCCAAACTCTTGATTTTACAGCGTATCTTCTGAGTAAATTACAAATGAATCA
>1253 a2igrp_5762
TAGAGATTGGTCGGGTAAAACCTTCCAAACCTCCCACCCTTTGTTTACATTACCTTTGTTGCTTTGGTAGGCCCGTCTTTGGACCGCCGGCTTCGGCTAGCCAGTGCCTACCAGAGGACCTAAAACTCTGTTTAATTGTATTGTCTGAGTACTATATAATAGTTA
>1254 a7ogrp_15997
ACAACAAGTGTTTTATGGCACTTTTTAAACAATCCATATCCACCTTGTGTGCAACGTTTAGAGGGTCTCTCGCTTTTTTAAAGTGTGGAACCCCTCTATATTTACCAACGTCTTTAGTTAACTTGTCTGAACATTTGTTATCACGAATTTACTTAATTCGAAATA
>1255 a4k_1526
CCTAGAGTTGTAGGCTTTGCCTACCTTCTCTTACCCATGTCTTTTGAGTACTTACGTTTCCTCGGTGGGTTCGCCCACCGATTGGACAAAAATAACCCTTTGCAGTTGCAATCAGCGTCTGAAAAACTTAATAGTTA
>1256 a20ogrp_7261
AAGAGTTGCAAAACTCCCAAACCATTGTGAACTTACCTTCAACGTTGCTTCGGCGGGTTGGCTCCGGGTCTCCCGGGGCCCCCGGCCCTCACGGGCGCCCGCCGGAGGTATCTAACTCTTGAAATTGTATGGCCTCTCTGAGTGATTTATAAATAAGTCA
>1257 a2igrp_18696
AAGAGTTAATAAACTCCCAAACCCATGTGAACTTACCACTGTTGCCTCGGCGGGACCTACCCTGTACCTACCCTATAGCGCTGGGCGGGCTACACTGTAGCGTAACGCCGGTGGATTTTTAAACTATTGTTATCTAATGTTATCTGAGCGTCTTATTCTAAATAAGTCA
>1258 a11ogrp_23939
ACGAATTTCAGGGGTTGTGCTGGTTCTTACAAGTGCACGCCTCTTTCAATTCCATTCACACCCTGTGCACTTTAAGAGACGTATTTCCCCCGTTTACGTGCCTTTATCGGCTTGGGACTTCGTCTGTTTTACACACACTATTCGTATTAGAATGTAATCTAGCGGAAACGCTTAAAACATAATA
>1259 a9f_12161
ACAAATCATTTGTATGGGAAACCATACATATTTACCCCAAGCCTAGGATGTGCTTCGGCGCAACACTGGGCTTTGGTTGGGCTGCGCTCATTCGTGAGTGCGGCTCCGGCATGTATGCTTCGGTGTACTAGCCACATAGACGCTTGTATGTTTGACAGTTTTAGTTGCTTTTAAAAATGA
>126 a19ogrp_904
GAGATGTGCGCAAGCACTTTTCCCTTCATACACCTGTGCACCGTGGTCTTCGGACCTCTTTACAAACATTGTAGTCATGAACGTCTTTTATTATAACAAAAT
>1260 a8l_7229
CAGAGATCATGCCCCTTGGGGTAGACCTCCCACCCTGTTTATATACTCTTGTTGCTTTGGCAGGTTGCCCTCACCATGGGGTGTCCGGGTTCAGGCCCGCGTCGTACCTGTCAATAGCCCCCAAACTCTGTGTTTAGTGTTGTCTGAGTCCTATAAAATAAGTTA
>1261 a9f_28873
TCGAGTATTCGGGTTGCCCTTCGGGGTCCCGTCCTCTCCAACCCATTGTTTACAAACCACGTTGCCTCGGCGGGCCAGCGGCTCCGGCTGCCTTTGGTCCTCTCTAGGGAGGACTCTCGAGCGCTCGCCGACGGGATCACACAAAAACTCTATTTTAAAACAAGTCAATTCTGAAACAAACGTAAATACTTCA
>1262 a16ogrp_3348
CCGAGTTTCAAACTCACCAACCCACTGTGAACATACCTACGTTGCTTCGGCGGCGGGCTTCGGCCCCCGCCGGGGACCCTAAACACTATTTTTAACCGATACCTCTGAGTAAAAAACAAATAAATCA
>1263 a1b_22246
ACAAATCCATGTTTTCTGTTGTATCATCCAATGTGTGTGACAAGGGGATTCGTTCTCTGTTTTGCACATTGCTTTGGTGGTACAAGGGAATAACACAAGTTCCATGTTGTGTATTTACTTGCACAGCATGACATTTCTGCAAATCGTCTGATTATAGAAATACAAATGAAACAAGAAC
>1264 a2i_6531
CAGTGAAATGCTGTAGACTTGGTGTCTTTGGATAAAACACTGATGTATTCTAAGGCTATGGCTTTATTATGCTAAGGTGGCCTGCAAAGGAATCCAGCACCGCCCAACCTTGTCAATATATTACAACGTTACCTCGGCAGGTTTGCCTGCCGGTGGACACTAAAAATCTTTTAAATTTAAGCTTTATTTAGTGAATAGTCTGATAACAAATTTAATAAATTTA
>1265 a20igrp_12903
ATGGTGCTTGCAGAAATGCTTGCACGGCGGCGGCCTTAAAACGCGCCAAATGGCACCCTTTGTTTACGAGTACCGTTCGTTTCCTCGGTGGGCTTGCCTGCCATGAGGACCAACAAAAACCTTTGTAGTAGCAGTATCTTCAGTAAAAACAAATATTA
>1266 a2ogrp_15891
CAAGAAGCGCCGAAAGGCTGCTTTACAACCATAGCGAACCTATCCTTCAGCGTTGCTTCGGCGGGTAGCCCGCCCCCTCGGGGGCCGGGCGCGGCTGGCCTCGGCCGCCGCCCGCCGGAGGTACGAAACTCTTTATAATGCTAGAATCTCTGAGTATACAAGCAAATAAGTCA
>1267 a5i_15811
GTGAATAAACCGGGGAGCGTCTTAACTGACCTCCCCATCCCTTCACAATCCACATACACCTGTGCACTGTTTTGGCTTTTGAGCAATCGAAAGCCAATCATTTTATACAAACTCTTAGTTTAATGAATGTAACCGTTTTATATAAACAAAATA
>1268 a11ogrp_30013
TGAATGTACTCGATGTATTTCACACTTGAACCACTCTCGCATACGAAGGGTCTCGGCTTGCCGAGACACGCCGTATCGAGAGTAAAAGTCAAACCACAAACATTTAACAAACATGACAAATAACACATGAG
>1269 a4igrp_5119
ATAAATGAATCTAACTATTGGGGACTTTTCTGCAAAGGAAAGTTCCTGGGTGAAAATCCCAAAACATCTTGTGTGAAACTGTTTTTACCCACCTTTCGTTTACGAAGGATTATAAAACTTTTTAAGCCTGAGAACCTAAATTTCTACGCAAGTAGGAATGAAAACAAAATCTTGTTTTAAACAATAAAAAA
>127 a10igrp_11592
TCGTACAATGGGGGTACGACGGCTGTCGCTGACTTTTAGTCGTGCACGCCCGAGTGCTCTCACATACACATATCCATCTCACCCCTTTGTGCATCACCGCGTGGGTCCCCTTCCTCGGAGGGGGTGCTCACGTTTTTAACATTAAACACCCCATTCGAACGTATCGTAGAATGTTCTTTGCGTGATCACGCGCGATCAATA
>1270 a9igrp_31916
CCAAAAGATAATCTTTCACTCGAAAGATCTTTTCCTTTGTGCTGGCTTTGACCGTATGTAATTTTGGGACTTAAACATGATACGCCTTACGGTGTATCGGTCCCAAAAACATATATCATCCTTATAAAAAACTTACTGAACTAAACAATTGATTTAATAATCTGTTTAAAA
>1271 a5ogrp_15144
ACGAGTTAGGGTCTTCCAGGCCCGACCTCCCAACCCTTTGTTTATTGAACTATTGTTGCTTCGGTGGGCCCGTCTAACGACCGCCGGGGGACCGCCGCGAGGCGCCTCCTGGCCAGTGCCCGCCGATAGCCCAACTTAAACCCTTATGAATCGTGTCTTCTGTCTAAATCATGATTATAAATCAAAACA
>1272 a9ogrp_11458
CCAAGAGAAATCTTTCAACACTGAAAGATCTTTTCCTTTGTGCTGGCTTTGACCGTATGTAATTTTGGGACTTTAAAATGGTTCGCAAGGGCCGGTCCCAAAAACAATATATCATCCTTATGAAATTTTTTCTGAACAATTAAACAAAATGATTTTAATAATCTGTTTAAAA
>1273 a8i_18688
CCGTGGGGGCCCCCCGGGGCCCCTGCCGAGATAGCACCCCCTGTCTTCCAGTACCAACCGTTTCCTCGGCGGGCTCGCCCGCCAACGGGGACCAAGCAAACCCTCAAACCGCAGTATCAGGAGTCTAAAACGTACCAAAACAAAAAATCA
>1274 a2ogrp_17886
TCGAATTACAAGGCGAAGGTTGTAGCTGGCCCGTGAAACGGCACGTGCACGCCCTAGCCCTTTAATCCACACACACCCGTGAACCAAATGTAGGCCTTCGGGCCTATGTATTTCATAAACCCATCGTATGTCTATAGAATGTAATTTTATTATTGCCTTAAAAACGCAACAAATA
>1275 a20igrp_22379
TTGAATTACCGGGGGCTGGATGCTGGCAGTCTATGATTGCATGTGCTCGCTCTCTTTAATCCACTTACACATGTGCACTCAATTTTGAAGACAGGGTAAAGCCTGTCTTTGAAACCTTATAAACTCTTACTCGATTGTAATGAATGTTTTTATCTGCCGAAAGGCAAAATTTAATA
>1276 a2b_4410
AAGATTCGGGCTTCGGCCCTACCTCTTCAGCTGTGCGCTTCGGCTGCACGTTGTCGAAACTCTCACACCTGTGCACCTTTTCGGTTGCGGCGTTCGCGCGTCGCTTCCGCTTTACATTAAACTACAAAAGTCCAGAATGTCAAAACCATATTATAAATA
>1277 a2c_9769
ATGAATTTTAGGGTGCTCTCTTCATCAGAGAGACCCGACCTTCATTTCTAACACTGTGAACTTTAATTGAGGACTTGCGCAAGCGAGAACTCTTATAAACTCTACAAGTTAAAGAATGTAACAAACCAAAACAAAGAA
>1278 a2ogrp_19346
ATAGTTTTTGTTAGGTTTCCGCGTAAGCGGGAGCCTATTAACAAACTGTGAATTAGGTGGTTTGCCTTGGCATTCCTCCCTTAAACTCTTTATTCTCTCCTGCCTTTAAATTAACAAGAAATCTAAAA
>1279 a4j_849
ACCTTTCAAAACAGGGTGCGTCGCGGCCCCCGAGGTGCGGAAACAAGCCTCGAGCGGTTTGGGGTCCTCCCCTTCACGCGCGCACGACTGCCATCCTTACTTTACGAGCACCTTCTGTTCTCCCTCGGCGGGGCAACCTGCCGTTGGAACCGAATAAACTCTTTTTGCATCTAGCATTACCTGTTCCGAAACAAACAATCGTTA
>128 a7igrp_24614
CCAAATCATGTCTCCCAGCTGCAAGGCTGGTGCAGGCGTTTAACCCTTTGTGAACCAAAAACCCTTTCGCTTCGGCAGCAGCTCGGTTGGAAACAGCCTCTGTGTCAGCCTGCCGGCAGCACCATTTATCAAAACTTGCAGTTAGCAACATTGTCTGATTACCAAATTTTCGAATGAAAATT
>1280 a2ogrp_2305
AAGAGAATCTGGCCGGGCAACCGGCCACTCTTACACCCTCTGTGTCCCGACTATGTTGCCTTGGTGGTCTGGCGTAACGCCTAACCGCCAATGGCCTCCACAAACTCTGCCTTTAGACGTCTAAGTAGAGAAATGAAATACATCA
>1281 a13igrp_19072
CCGTGTTTTTGCGATCGGGGGTCCGCCCCTGATCTCGCACGCCCCCTGCGTACGCATCTGGTTGCTTCGGTGGGTCGCTCGTTGGGCGTCCTCGTCCATGACCATCTCCCTCGCCTCCGGGTTGGGGGATGTGCCCCCACCGACAGACTCCCAAAACTCTGGCCTTTGCAATGATGTCTGAGCCTTGATAATAAATCAAACA
>1282 a3igrp_4824
CAGAGTTCATGCCCGAAAGGGTAGACCTCCCACCCTTGTGTATTATTACTTTGTTGCTTTGGCGAGCCGCCTTCGGGCCTTGCGTGCTCGCCAGAGAATATCAAAACTCTTTTTATTAATGTCGTCTGAGTACTATATAATAGTTA
>1283 a8igrp_8864
CTAGAGCAAAGGACAGGCAGCACCCTATAGAAGCTTGCTTCGTAGTGGGCTACCCTACTTCGGTAGGGTTTAGAGCCGTCGAACCTCTCGTAGAAGTTCGGTCCTGAACTCCACCCTTGAATAAATTACCTTTGTTGCTTTGGCAGGCCGCCTCGTGCCAGCGGCTTCGGCTGTTGAGTGCCTGCCAGAGGACCACAACTCTTGTTTTTAGTGATGTCTGAGTACTATATAATAGTTA
>1284 a7ogrp_17000
TTGGGATACGCTTCGGGGTCGCAAGGCTCCGTAACTGAATCCTTGTCTTTTTGTGCACCGTCTGTTTCCTCGGCAGCTCCGCCTGCCAACGGGGACCCCCAAAAAACCTTTTGCAATCTTAGTATAAACATTCTGAAAAACACAAATATTA
>1285 a14igrp_19872
GTGAATACAAACGCCTGGGTGTCTCTGCTTCGGCAAGCCCCTCGCACCCTTCACATCCATAACACCTGTGCACTGTAAGATGACTCTCCGGCTTCGGCCTCTGGGTGTTTGACCTTTTTACAAACCTTTATATGTAACAAATGTAGTCTTATTATAACAAAATA
>1286 a8igrp_13680
CGAGAGTGTCACCACTCCCAACCCATTGTTTACCTACCCGTCCACCGTGCTTCGGCAGGCAGCCCTGTGGGACAGAGCCTCGCCCCCCTCGCGGGGGGTGCCTGCCGCTGGCCAACCACAAACTCTTGTTATTTTAGTACCATCTGAGTCTTCCACAAATGAACA
>1287 a18igrp_11067
CCTTTGGCTGCCGTGAGCGCTTCGGCGTGAGCGACGGTCATTCTAGCGAGGCCTCCGTTCCGGGCAACCGGCGCGGGGCTGACCTAACCCTTCTCTACGAGTACCTAACAATTCTCCTTCGGCGGGGTCTACCCGCCGCTGGACTTCAAGAACCAACTTGCATTTAGCATTACCTGTTCTGATAACAATTAATTATTA
>1288 a5i_7157
CCGTAGGGGCGTAACACCCCCTTCGAGATAGCACCCTTGATTTTCGAGTACCTTCTGTTTCTTCCGCGGGCCCGCCCGCCGGTGGACAAACTCAAACCCTTTATTGCAATAGCAGTACTCTGATAAACAAAACAAATAATCA
>1289 a7ogrp_5092
ACAAATCAGTTGTATAGCTTAGGCTATACATATTCACCCCAAGCCTGCTTGTCAGGCTTTGGTAGGCTAGTGTGCTTCGGCGTACTGGCCACATAGACGCTTGTATTGTTTGACAGAGTTTAGTTGCATCAAAAAATGA
>129 a20ogrp_4505
CAGAGTTCATGCCCTTACGGGTAGATCTCCCACCCTTGAATAACTTACATTGTTGCTTTGGCGGACGCTTCGGCAGCCGCCAGAGGACCCTAAACTCTTGTTTACAGTGTCGTCTGAGTACTATATAATAGTTA
>1290 a2i_862
CAGAGAACCTCGCCCTACCGGGTGGATCTCCAACCCTGTGCTTATCCACCATTTGTTGCCTTGGCGGGCCGCTCCGGCCACCGGTTCCGATCGGTGAGCGCCCGTCAGGGGACCGCAACTCTGTTGTTCGTGTCGTCCGAGTATTATACAATCGTTAA
>1291 a120grp_1432
CATTCAGTAGCCTAGCTACTTGTTTACACCCTTGTTTTTTGCGTACCTATTGTTTCCTCGGTGGGCTTGCCTGCCGGTTGGACAAAACCTATAACCCTTTTTAAATCTTCAATCAGCGTCTGAATTATACATAATAATTA
>1292 a5a_3807
ACGAGTTCAAAAGTCGGTCGGCCGTGCTGGCGGAGACGCATGTGCACGTCGGTCACGAACCATCCACACACCGTGAACCTATGGCCCGGGTCTTTTGACCTCGGGCACCATTTTCACACTCTGTTCGTAAAGGAATGTCTAAACTCATAAACATAA
>1293 a18ogrp_16845
CCGAGTGAGGGCGCTTGCGCCCGACCTCCCAACCCTTTGATTTATCAAAACCTCATTATGCCTCGGGGGCGACCCGGCCTCGGCCGAGTCCCCCCGGCGGCACCCCCAACCAACCCTGCATCAATTGTCGTCTGATTATAAAGTTAATTCAATCA
>1294 a11igrp_26665
TCGAATGAATATAGAGTCGGTTGTAGCTGGCCCCTCCGGGGGCATGTGCACGCCTTCTCTTTCATCCACACACACACCTGTGAACCCGTGAGACGGGGGGAAAGCCCTTTGGGGTGGACCCGTCTGCTATATTATAAACACATATATTGTAAAACGAATGTACACGATGTAAACACATCTTTAAAC
>1295 a5k_26751
ACAAATCTCTATGATATATGGAGTTATCCATATTCACCTTGTGCATCGTCTTGACTTTTCAAAAAAGTCAGGATTTCGTGGTGATGGCCCGAAAGAGACAGACAGCTAGTCTGGCTTTGAGGATCGATCAACCCACATTAACGTTGTAAACACTGGATTATTTTACTAACAAAATGTTAATAA
>1296 a16igrp_1115
ACAAATCCGGTGTACTACTGTTGTTCATGTGCATTTCCATGTGCGTGCATCAGTAGTGACACACAAGTTCCATGTGCACGTTCACTCTGCACATGACATTTCTGTTTATTGTCTGATTGTGATTAGTGTTGAAATGATAA
>1297 a6igrp_2384
CAGAGAACATCGCCCTCACGGGTGACCCTCCAACCCTTATGTTATTAAAACTCTTGTTGCTTTGGTGAGCCGCTTCGGCCACCGGCTTCGGCTGGTGCGCGCCCGCCAGGGGACCACAAAACTCTGTTTATTAGTGTCGTCTGAGTACTATATAATAGTTA
>1298 a10ogrp_27982
TTGAATAATCTTGGCGTGGTTGTAGCTGACCTCCTTACCGGGGTATGTGCACGCTCGTCATCTTTATATCTCCACCTGTGCACCTCTTGTAGACTTGGAACAAATGAACACTTTCCGAGGCAACTCGGTCGGGAGGACTGCTGTGTGTCAATGCCAGCTTTCCTTGCATTATCCAAGCCTATGTTTTTCATATACCCCAAAGAATGTAACAGAATGTATCATTGGCCTTGTGCCTATAAACTATATA
>1299 a7igrp_4586
CCGAGTTCATGCCCTTACGGGTAGATCTCCCACCCTTTGTATACTATACCTTTGTTGCTTTGGCGGGCCGCCTAGCTACTGGCTTCGGCTGGTAAGTGCCCGCCAGAGGACCCAAAACCCTGAATTATTAGTGTCGTCTGAGTAAAATATTTAATATTTA
>13 a5i_25155
ATAATAAGTGTTTTATGGCACTTTTTAAATCCATATCCACCTTGTGTGCAATGTCAGTCGTTCTCTCTTTTGAGAGCGACCAAACATCAACTTATTCTTTAACTCTTTGTCTGAAAAATATTATGAATAAAATAATTCAAAATA
>130 a20ogrp_1709
CTGGGTCGCAGGGCGCTTCGGCGCCCGATACCAACCCTTCGTTTTCCGCCCGTCCTTTGGCGCAAAGGGGGTCTCTCAGAGGGGACCCCTGCCAAAAGCAACCCTGAACAACTGTGCAGCCTGAAGTAAAAAGCAAATAGTTA
>1300 a2b_1658
AAGAGTTATAGGGTGCAAACCCGAACCTCCAACCCTTTGTTGTAATTGACTAGTTGCCTTGCCCCGGTGCTTCACCGAGGCAGTGGACCTATAAACCCGAATATCAGTGTAGTCTGAGCTTAAATTCAATGAATTA
>1301 a20igrp_3209
CTGGGTCACAGGGCGCCTCGGCGCCCGTCACCACCCCCTGCTTCCCGCCCCCTTTCGGCGCGATGGGGTCCCCTTAGCGGGGCCCCCTGCCGGAGCCCAAACTCTGAAGAAACTTGAAGCCTGAGTCGAAAAGCAAATAGTCA
>1302 a2igrp_1055
ATAATAAGTGTTTTACTGCACTTTTTAAACAAGTACTCACCTTGTGTGCAATGTTTGCTGCTGCGTCGTTTACGCGTCGTGCCAGCACAATACCAACCTTTTATTTAAACAATTTTGTCTGAAGATATTTTGAATAACTAATTCTAAATA
>1303 a5i_328
CAGAGAACATCGCCCTCACGGGTGACTCTCCAACCCTATGTTATACAACCTTTGTTGCTTTGGCGAGCCGCCTCGGCCGCTGGCTTCGGCTAGCGAGTGCTCGCCAGAGGACCCCAAACTCTGAATATTAATGTCGTCTGAGTACTATATAATAGTTA
>1304 a9igrp_457
CAGAGTTTTTAACTCCTAAAACCATGTGAACTTACCACTGTTGCCTCGGTGGAAGGTACCCGAAAGGGTGCTGGAAGCCGGCGGACATCTAAACTCTTGTTAATTTTTGTTATTCTGAATCAAACTAAGAAATAAGTTA
>1305 a2igrp_604
CAGAGTAAAATGGGCTTCGGCCCACCATCTCTCACCCTTTGTTTACCACACCCCAGTTGCCTTGGCGCCTCGCGCGCCAGCGGAACGAAACCCTAGAATCTCTGCTGTCTGAGTACTATATAATAGTTA
>1306 a20ogrp_5749
ACGAATTACTAGACTGACCGTGCTGGCGGAAACGCATGTGCACGTCGGTCGCAAATCCACACACCTGTGAATCTATGGCCTCGAGTCTCTCTGAGATTTGGGGCAACAATTTTACCCACTCTGTAAAAGAATGTCTACTGTGCTAAAAGCGCAAAAGCAAA
>1307 a4a_4388
CCTAGAGTTTGTAGACTTCGGTCTGCTACCTCTTACCCATGTCTTTTGAGTACCTTCGTTTCCTCGGCGGGTCCGCCCGCCGATTGGACAACATTCAAACCCTTTGCAGTTGCAATCAGCGTCTGAAAAAACATAATAGTTA
>1308 a7igrp_12547
ATGAATGTATAAATGGCGAAGTCGAGGAATTTGGGGGAAAAACAGCTGTCGCTGGCCTTGTAATTTATGAGGCATGTGCACGCTCCCTGAGGACCTCTTCGACGTCTATCATATCATCTCTCTCACCTGTGCACCTAATGTAGGTCTGCATGGTTTTGGTAAAACAGAACTGTGCTAGAGCCTCTCTCTCTGCGGGGGGAAAGGACAAAGTACCTATGTCTTCAAAATACATCTTCGTGTAGAAAGTCTTAGAATGTTTACTATCATCGAGTCGCGACTTCTAGGAGACGCGGGTCTTTGAGTTAAAAGTTTATTA
>1309 a5i_14816
ATAATAAGTGTTTATGGCACTTCTTAAATCCATATCCACCTTGTGTGCAATGTCAGCCGTTTTCTTTATGAAAGCGGCCAAACATCAACTTATTTTTTAACTGTCTGTCTGAAAACTATTATGAATAAACAATTCAAATA
>131 a8i_3191
AAGATTCTTCGGATGTGCGCTCCGGCTGCACTCCGAAAACCCCATCTCACACACCGTGCGCCTCGAGCGGGGAGACCCGCTCGCCTTTACACATCACACAAGTAAACCAGAATGTCAAATACCATAAATTAATA
>1310 a5i_11401
CTGGGACCCAGGTTGGGCGCTTCGGCGCCCGCCCCCACCCTTTGCCTAGCCTCTAGACAACACAAACCCGTCGGCCTTAGGCGCGCCCGCTTGACAGCGCGGTGCGCCGGCCGGACATCAAACCCTGAACAACATTGCAGCCTGAAGTTAAAAGCAAATAGTTA
>1311 a5i_24758
ACAAAACAAGGCCTGGCCAAAAGCCGGCAACCTTAACACCTGTGCACCGTGAATTGTCTCTGGTGGATTCTGTCCACCGAACACGAACCCTGATATACCTACGTCTTAAATAATTGTTTAACAAAAAA
>1312 a5k_18831
TCGTGGGGATTCGTTCCCTCTAGATAGACACCCTTTGTTTATGAGTACCAATTGTTTCCTCGGCGGGCTTGCTCGCCGTTGGACAACCAAAAACCTTTGTAGTAGCAGTATCTTCAGTTAAAAAATAAATATTA
>1313 a2igrp_5354
CAGGACTCGCAAGACTCCTTCACCCTGTGAACTTAACTACAAGCACGTTGCTTCGGCGGGTGCCTCGGCGAGGGTCCTCCCTCCCCGGGGCGCGAAGCCCGCCGGCAGCCCACCAAACTCTGTCTCTCTGCGTTGGCATCTCGAGTACAATCAAACAAGTTA
>1314 a9igrp_5181
CCGAATCGTCAAACACGGGTTGTTGCTGGCCCCCGAACGGGGGCACGTGCACGCTCTGTTTACGCATCCGCTCACACCTGTGCACCCTCGGTAGTTCTATGGTTCGGGAGACCCCGTCTTCCTTCCGTGGCTCTACGTCTTTACACACATACGATGTCTCGTGGAATGTTTTTCGCGTTTAACGCAATACAATA
>1315 a20igrp_2220
ATGAATTGTAAAGGGGGTTGATGCTGGCTTTACTGCATGTGCTCGCCTCCGACAATCCTTATCCATACACCTGTGCACCTCTGAGGGGTTTTCCGTTTATCGGTCGAGCCCCTCTTTTTACACAAACCCTTTCTTATAACATCGAACGTGATTAGTGCCGATAAGGCCTTAAACAAAATA
>1316 a2igrp_17282
CCGAGTTATTCTACTCCCAAACCCCTGTGAACTTATACCTTTACTGTTGCTTCGGCGGGTTAACGCCCCGGAAGGCCCGCGAGGGCCGCCGGAACCAGGCGCCCGCCGGGGGACCCAAACTCTTGTATCTTTTTTATAGCATGTCTGAGTGGAATCATAAACAAATGAATCA
>1317 a8i_29340
ATGAATATTAGGGCGCCTTTACTCACCGTATCGGGCCTGACCTCCATTATTCACACTTGTGCACCAAAAAACGAATGTTGCAGCTGCGAAACGAGGATTAGTTTCTTCATAGTAGCTTTTGCTTCATTTCTTATTACTTAAACTCTAAGTCAATGAATGTAAACAAACCATAACAAAATA
>1318 a20ogrp_11447
CCGAGTTTACACTCATAACCCATTGTGAACATACCTTAGTTGCTTCGGCGGACCGGGGAAGCCCTCTCGGGGGCCGACCCGCCGCCGGGGAAAACCAAACCTCTGTTTTTACATGTGTATCTTCTGAGTAAAACATAAATAAATCA
>1319 a5d_9917
TCGAATAAACTTGAGCATGCTGTTGCTGGCCCCTCTCCTGGGTGGGGTATGTGCACGCTTGTCCTTTGTTATTTCTCCAACCTGTGCACATTTTGTAGACCCTGGAGATTTCATGAATTTTGATTCGAGACGGGACTGCTGCTGCTTCCCTTTGTTGAAGCCGGCTTTTCCTTGCACCTCCAGGTCTATGTCATTTTTTACAACCTCAATTGAAAACAAAAACATGTTTGGATGTACCCATAGAAATGAAATATA
>132 a16igrp_1449
CTGGGTTACCAGGGGCTTCGGCCCCGCTCCCAACCCTTTGCATCTCCGGCCTTGCTTCGGCGCACAGGGTGCGGAGGGCCCCCCGTCGTCGGAGGGCCGGCCCGCGCCTCGCCGAACTAATTGTCCAACCTACTGCCTCCACAACAATTGTAAGTACTGAGAAAAATAAG
>1320 a2igrp_1332
CCGAATTGTCAAACGGGTTGTTGCTGGTCCTTGAAAGGGGACATGTGCACGCTCTGTTTACACATCCACTCACACCTGTGCACCCTCCGTAGTTCTATGGTCTGGGAGACCCTGTCTTCCTGCCGTGGTTCTACGTCTTTACACACACACTGTAACAAAGTCTTAAGGAATGTATGCAGCGTCTAACGCAATACAATA
>1321 a2igrp_6563
ATAATAAGTGTTCTACTGCACTTTTTAAAAATAGTACTCACCTTGTGTGCAATGTTGTGTGGAATTCGTAAGAATTTCACACCTACACCAACCTATAACCTTGAACCACTTTGTCTGAAAAACTATTATGAATACTTAATTCAAAATA
>1322 a8i_1912
ATAGTGCCCTCTGATGCAAATCATTGGGTTAGATCTGCTCTCTTCGCAAGAAGAGGGTTTCCATACACACCGTGAACTGTGGCTTCGGCCATCACAAACTGTTAGTAATGAATGTAATATCATAACAAAAAC
>1323 a2igrp_5145
CAGAGTTTCTAACTCCTAAAACCATGTGAACTTACCACTGTTTCCTCGGTGGAAGGTACCTGAAAGGGTGCTGGAAGCCGGTGGACATTTAAACTCTTGTTAATTTTGTTAATTCTGAATCAAACTAAGAAATAAGTTA
>1324 a5i_1577
CAAGTGACCCCGGTCTTACCACCGGGATGTTCATAACCCTTTGTTGTCCGACTCTGTTGCCTCCGGGGCGACCCTGCCTTCGGGCGGGGGCTCCGGGTGGACACTTCAAACTCTTGCGTAACTTTGCAGTCTGAGTAAACTTAATTAATAAATTA
>1325 a20igrp_2248
CTGGGTTACCAGGGGCTTCGGCCCCGCTCCCAACCCTTTGCATCTCCGGCCTTGCTTCGGCGCACAGGGTGCGGAGGGCTCCCCCGTTCGCGGGAGGGCCCGCCGCGCCTGCCGAATATTGCCAACTCTGCCTCACAACATTGAAGTCTGAGAAAAATGATTAATAGCGAA
>1326 a5i_1736
GTGATTGCCCTAGTGGCTTAAAACTATATCCATTTACACCTGTGAACCGTTTGATTGACACTCTGTGTTGATTTTACAAACAATATGTAAAGAAAGTCAAGTTATTATAACAAAAAA
>1327 a1igrp_1311
CCTAGAGTTGTAGGCTTTGCCTGCTATCTCTTACCCATGTCTTTTGAGTACCTTCGTTTCCTCGGTGGGTTCGCCCGCCGATTGGACAATTTAAACCATTTGCAGTTGCAATCAGCGTCTGAAAAAACACAATAGTTA
>1328 a5d_1114
CCGAGTTTACAACTCCCAAACCCCTGTGAACATACCTTAATGTTGCCTCGGCGGATCAGCCCGCGCCCCGTAAAACGGGACGGCCCGCCAGAGGACCCAAACTCTAATGTTTCTTATTGTAACTTCTGAGTAAAACAAACAAATAAATCA
>1329 a8ogrp_8103
CCGAATTGTCAACAAGAGTTGTTGCTGGTCCTCAAACGGGGGCACGTGCACGCTCTGTTAACACATCCACTCACACCCTGTGCACCCTCTGTAGTCCTGTGGTTGGGGGGCCTTGTCCTCCTGCTGTGGTTCTGCATCTTTACACACACACTGTAACAAAGTCTCATGGAATGCATCTGCGTTTAACGCAATACAATA
>133 a1igrp_12894
CCGAGTGAGGGCCCTCTGGGTCCAACCTCCCACCCGTGTTTATCGTACCTTGTTGCTTCGGCGGGCCCGCCGCAAGGCCGCCGGGGGGCATCTGCCCTCTGGCCCGCGCCCGCCGAAGACACCATTGAACGCTGTCTGAAGATTGCAGTCTGAGCAATTAGTTAAATAACTTA
>1330 a5i_944
CCGTGGGGATTCGTCCCCATTGAGATAGCACCCTTTGTTTATAAGTACCCCTGTTTCCTCGGTAGGCTTGCCTATCAAAGGACCCTTAAAAACCTTTTGAAATTGTAGTTTCCTTCAGTATAAAATCAATATCA
>1331 a5i_2329
ATGATGCCCTCGAAGTCTTTGGACTGGTAGGGTTTGTGTCGGTCTCTTTGGAGCCGACCTTATCTCACACACCGTGAACTGTGGCTTCGGCCATTATAAACTGTTAGTAAAGAATGTAATATCATAACAAATATA
>1332 a8igrp_13148
TCGAATTATAAGCAAAGGTTGTTGCTGGCCCCTCGGGGCATGTGCACGCCCTAGCTCTTAATCCACTTACACCTGTGAACTCAATGTGGGACGTCCTTCGGGATGATTCTCATGTCTTTCTATATACTCTTATGTATGTCGCGGAATGTCTTATTGTTGCTTTAACGTCAATTATATA
>1333 a16ogrp_3995
TCGTATAAACTTGAACAGGCTGTTGCTGGCCCTCGCAATGCGGGGGTGTTGTGCACGCTTGTCTCATCTTTGTCATTTCTCCAACTGTGCACATTTTGTAGATCCTGGATGGGAGCCCTCATGAACTCGCGTTCGAGTCGGGACTGCTGCTGCTTTTTCTTGGAAGGCCGGCTTTTCCTCGTATCTTTTCCAGGTCTATGTCATTTATCACAACCTCTCGAATATGTTTAGAATGTGTTGCATATAAAAATGAAATATATA
>1334 a7ogrp_1881
CAGAGCATCATGCCCTTCGGGGTAGATCTCCCACCCTGTGTATTACATACCTTCTGTTGCTTTGGCGGGCCGCCTCGGCCACCGGCTCCGGCTGGTGCGTGCCCGCCAGAGGACCCCAGACTCTGAATGTTAGTGTCGTCTGAGTACTATATAATAGTTA
>1335 a2ogrp_4341
CTGGGTTTCGGACCTCGTGTCCACTCACCCGCCCTTTGTCATGAGACGCGAAAGCAACTCACATCGTTTCGGCCCTTAACTCTCGGGCGCCCCCCGCCATTAGTTTGGCGGGGGTACCGCCTGTCGGTCGCGGGTCGGCATTGCAAACCCACGCGGATTACTGAAGTCTGATACCAATTTTTTAAACGAAATTA
>1336 a2igrp_6013
CCGAGTTTACAACTCCCAAACCCAATGTGAACCATACCAAACTGTTGCCTCGGCGGGGTCACGCCCCGGGTGCGTCGCAGCCCCGGAACCAGGCGCCCGCCGGAGGGACCAACCAAACTCTTTCTGTAGTCCCCTCGCGGACGTTATTTCTTACAGCTCTGAGCAAAAATTCAAAATGAATCA
>1337 a1l._1927
ATAAATGCTTCATTGCATCCACCTTTTGTGCACTGTAAATATTTCACTTGAATTTTGTCTGATTAATCTTTGTTCTGAAAGGAACATGAATTATAATCTAATA
>1338 a15ogrp_1604
GTGAACGCCCTCACGGGCTTATAACTATTCCAAACCTCTGTGAACCGTGCCCTTCGGGGCTATTTTACAAACATGGTGTAATGAACGTCATATATCATAACAAAACA
>1339 a5i_1656
CCGAGTTTACAACTCCCAAACCCCTGTGAACATACCATTTGTTGCCTCGGCGGTGCCTGCTTCGGCAGCCCGCCAGAGGACCCAAACCCTTGATTTTATACAGTATCTTCTGAGTAAATGATTAAATAAATCA
>134 a1igrp_15352
TCGTACAAACCGAGGTGCAAGGGCTGTCGCTGACCTTCAGAGGTTGTGCACGTCCAAGTGCTCTCACACATCCATCTCACCTTTGTGCATCGCCGCGTGGGTCCCCCTTTGCAGGAGGGCTTGCGTTTTCACATAAAACTTGATACAGTGTAGAATGTTTCATTTGCGGTCACACGCAATCAATA
>1340 a1igrp_186
CAAATCTTTGCGAGTGTTGCGTTTACGCAGCATCTCACACATTAGCACAAGGTCGCAAGGCCTTGATGTTTACGCTTGTATGTTTGACAGAGTTAGTTGAGACACAAATAAAGA
>1341 a8i_23029
ACAAATCCAATATGAGGATGGGGTGAATAACCCTATTTTCAATATTAAACCGCTGGCCCGTTAGGGCTAGTTGGATATATATGCGTGTTATGTTGACAGTGTGTGTGACTTTTAAAATTATTGA
>1342 a8j._910
CAAATCTTTGGGGGCTAGTCGCCTAGTGCGCTAGTCTCACATTAGCACAAGGTCGCAAGGCCTTGATGTTTACGCTTGTTTGTTTGACAGAGTTAGTTGAGAAAAAATTAAAGA
>1343 a9ogrp_7046
TCAATTTAACAGTTCGTGGGATAGACGCTAGTAAGGCTACCCTTCTCACGCTGTTTCAACCCTTTGTCTTTTGCGTACTGTATGTTTCCTCGGCGGGTTCGCCCGCCGATAGGACACTTCAAAACCTTTTGTAATTGCAATCAGCGTCAGAAAAACTATAATAGTTA
>1344 a4ogrp_2284
CTGCTTGCTCATGGCCGCCCCGGGTCCTGCCCGGGGCGGTACGGCAACATCACCCTTGTCTATGTATACCCTTTGTAAGTTCCCTCGGCGGGGTCACATCCGCCGAGGGAACCCCCCAAAACCTCTTGTATTAAGCATCAAATCTTCTGAAACAAAACATAATAATTA
>1345 a7ogrp_7327
ACGTTGGGGACTAACAATCCCTCAGCGAGATAGAACCCTTGCTTTTTCGAGTACCACACGTTTCCTCGGCAGGTACGCCTGCCAATGGGGACCATTTAAACCCTTCTGTAATAGCAGTAAACGTCTAAAACAACAAAAATTTA
>1346 a9ogrp_18196
CCGAGCGCCGGGCCCCGGCCCGACCTCCAACCCTTTGTGAACCACTCTCGTTGCTTCGGGGGCGACCCTGCCGTCCGCGGCCGCGGCGCCCCCGGAGGCCCAACCCAACCCTGCATTCTCGTACGTCGGAGTCTCAAGTAAAATTGAACA
>1347 a8ogrp_9712
CAGAGTTATCCAACTCCCAAACCCATGTGAACTTATCTCTTTGTTGCCTCGGCGCAAGCTACCCGGGACCTCGCGCCCCGGGGGGCCCGCCGGCGGACAAACCAAACTCTGTTATCTTCGTTGATTATCTGAGTGTCTTATTTAATAAGTCA
>1348 a4a_22927
CCGAGTTTACAACTCCCAAACCCCTGTGAACATACCTTTTGTTGCTTCGGCGGGATCGCCCCGGCTGCCCTGCGCGCCGGATCAGGCCCCCGCCGCAAGACCCAAAACTCTGTTTTTATAGTTATTCTTCTGAGTGGCTTTAAGCAAAAATAAATTA
>1349 a8igrp_6933
CAGAGTTCATGCCCTTACGGGTAGATCTCCCACCCTTGAAATTTGTACCTTTGTTGCTTTGGCGGGCCGCGGCCTCCGCTACCGGCTTCGGTTGGTATGTGCCCGCCAGAGGACCCAACTCTTGTTTTTAGTGATGTCTGAGTACTATATAATAGTTA
>135 a4a_12495
CAAATCTCTGGTGAGGGGGAGAGAGAGTGAGGGGGGAAAAGGACAAGAGGTGTTACAGCCTCGAGTCCCCATCCTAACCCAATCTTGATTCGAACCCGACCCAACATATGCACAAGGCCGCAAGGTCTTGATGTTTACGCTTGTTTGTTTGACAGATTTATTTGATCGGAAATATTGA
>1350 a14ogrp_2927
CCGAGTTTACAACTCCCAAACCCCTGTGAACCATACCTATCGTTGCTTCGGCGGACACGCCCCGGCGCCCTCGCGGCCCGGACCAAGGCGCCCGCCGGAGGACCCCAAACCATTGTGTGTTATAGCGGCATTATCTGAGTGACACAAACAAATAAATCA
>1351 a13igrp_8128
CATGATATCACAGGGGGTTAGTATCACGAAAGTGTGCTGACCCTGTCTGCATATTATACCCATGATTTTGCGTACCATTTGTTTCCTTGGTGGGCTTGCCCACCAAAAGGACACCAAACAACCCTTTGTAATTGCAGTCAGCGTCAGAAAACTATAATAATTA
>1352 a6igrp_645
CTGAGTGAGGGCCCTCTGGGTCCAACCTCCCACCCGTGTTTATTGTACCTTGTTGCTTCGGTGAGCCCGCCTCACGGCCGCCGGGGGCTTCTGCCCCCGGGTCCGCGCTCACCGAAGACACCTTTGAACTCTGTATGAAGATTGCAGTCTGAGCGAAAACTAAATAAGTTA
>1353 a4a_5930
GAGAATTAGGTCAGACCTCGGTCGACCAACCCTCTTTCCAACTCTGTGAACTATGGCAACGAAGGCTTCGGCTTGACTTGCGTCTCATTTAAACATCAGTCATTGTATGTAACAAAAATAAAATAAGAA
>1354 a2igrp_5149
ATGATTGGCCCTCGTGGCCCTATCAAATCCACATACCTCTGTGAACTGTTGGCCCTCGGGTCATCTACAAAACATTGTGTAATGAACGTATCATATATAAACATAAAA
>1355 a20igrp_18962
ATGAATATTAGGGCGCCTTTACTTAACCGTATTGGGCCTGACCTCCATTATTCACACTTGTGCACCAAAACCAATGTTGCAACGGCGAAACGAGGACTCTTGGGTCTTCAAAGTAGTTATTGCTTCATTTTTTACTATTATACTCTAAGTCAATGAATGTAAATAAACCATAACAAAATA
>1356 a8i_18794
CCTAGAGTTGTAGGCTTGCCTACCATCTCTTACCCATGTCTTTTAAGTACTTACGTTTCTTCGGCGGGTCCGCCCGCCGTCGACAATTTAAACTCTTGCAATTGAAATCAGCGTCTGAAAAAACATAATAATTA
>1357 a8i_9384
TCGAGTTTTGAACAGGTTGTAGCTGGCCTCTTAATGAGGTATGTGCACGCTTGGCTCATCCACTCTTCAACCCCTGTGCACTTTTCATAGGATAGGCAAAGGCTGGGAATACTTCTCAGTTCAATGTCTGCTCTGTGTAATTTTTATACCAACTCTTGTTGTATATGAATGTCTTCTTGCGGATAACGCAACTATAAAA
>1358 a2i_5478
ACGAATTTCAGAGGTTGTGCTGGTTCTTACAAGTGCACACCTCTTTCAATTCCATTCACACCCACTGTGCACTTTAAGAGACGTATTTCCCCCGTTTACGTGCCTTTATTGGCTTGGGACTTCGTCTGTTTTACACACTCTTATTTGTATTAGAATGTAATCTAGCGGAAACGCTTAAAACAAATA
>1359 a2igrp_16134
CCGAGTTTACAACTCCCAAACCCCTGTGAACATACCTATCGTTGCTTCGGCGGATCCGCCCCGGTGCCTTCGGGCCCGGACTCAGGCGCCCGCCGGGGGACCCAAACTCTTGTATTTCTTTAGTATCTTCTGAGTAAACAAGCAAATAAATTA
>136 a8i_5110
CAAATCTTTGTCTTGCATAGGTGTAGGTGGGCAGGTCTCTGGCCTGTCTGCCTACTCACTAGCAGACACATATGCACAGGGCCGCAAGGCTCTGATGTTTACGCTTGTTTGTTTGACAGATTTATATGTGACTAAAACTTGA
>1360 a14ogrp_3412
GTAAACGCCCTCACCGGCTCAACTATTCAACCAACCTCTGTGCAATGTCGTCTTCGGACGCACAACAACAAACTACAACAGTCAAGAACGTATCAAACAAAACGAAACA
>1361 a5k_4038
GTGAATTGAGCTGGCTTCGGCCGCTCTGATCTATACACACCTGTGAACTGTTGGCCTTCGGGTCTTTAAATACAACTGTGACGAACGTAAATTATTATAACAAATA
>1362 a13igrp_17729
TCGTACAAAATGTGAGGGACATGTGAGGGCTGTCGCTGACTCAAAGTCGTGCACGCCCGAGCGTGTCCTCTCGCATAATAATCCATCTCACCCTTTGTGCATCGCCGCGTGGGCACCCTTTGGGATCGTCTCGGAGGGGGCTCGCGTTTTCACACAAACCCCCCTTTTAAAAGTGTAGAATGACCTCATTTATGCGCTAACCCGCAATCAATA
>1363 a4a_239
CCGAGTTTACAACTCCCAAACCCCTGTGAACTTACCTATTGTTGCCTCGGCGGTGCCTGTTCCGACAGCCCGCCAGAGGACCCCAAACCCTGATTACATTTAAGAAGTCTTCTGAGTAACCGATTAAATAAATCA
>1364 a13igrp_3111
GTGATTGGCCTCTGGCCTTAATTCATGTCCAACCTCTGTGAACTGTGGCCTCCGGGCCGTATTTTTAACATCAGTGTAAAGAATGTAAAACATTAGAAAAAACA
>1365 a2igrp_17974
CTGAGTGAGGGCCCTCTGGGTCCAACCTCCCACCCGTGTTTATTGTACCTTGTTGCTTCGGTGCGCCCGCCTCACGGCCGCCGGGGGGCTTCTGCCCCCGGGTCCGCGCGCACCGGAGACACTATTGAACTCTGTCTGAAGATTGCAGTCTGAGCATAAACTAAATAAGTTA
>1366 a4a_323
TTGAATTCGGCCTTCTGGCCTTATCCACATAATACACTGTGAACCGTGGCTTCGGCCCAAACTTGAAGTCTTGAATGTGATATATGATAACAAAATA
>1367 a2igrp_5253
CCGAGTTCATGCCCTAACGGGTAGATCTCCCACCCTATGTTATTGTTACCTTTGTTGCTTTGGCGGGCCGTCAGACCTCGGTCAGGCTATTGGCTTCGGCTAGTAAGCGCCCGCCAGAGGACCCTAAACTCTGAATATTAGTGTCGTCTGAGTACTATATAATAGTTA
>1368 a5i_3813
AAGAGTATAGGGGCTTCATGCCCACTAACTCCACCCTTTGTTTACATACCATTGTTGCTTTGGCAGGCCCGTCGCAAGACAACCGGCTTCGGCTGGTCAGTGCCTGCCAGAGGACCTAAAACTCTTGTTTAATCATATTGTCTGAGTACTATATAATAGTTA
>1369 a4a_9087
ACGAGTTCCCCTTAAACGGGTAGAATTCCCACCCTATGTTATCATTACCTTTGTTGCTTTGGCGGGCCGTCTCGGCCTCGGTCAGGCTACCGGCTCCGGCTGGTAAGCGCCCGCCAGAGGACCCCAAACTCTGAATATTAGTGTCGTCTGAGTACTATATAATAGTTA
>137 a1igrp_1823
CAGAGTTCATGCCCTAACGGGTAGATCTCCCACCCTGTGTTATTTTACCATTGTTGCTTCGGCGGGCCGCCTCGGCCACCGGCTTACGCTGGTGAGTGTCCGCCAGAAGAATCCAAATTCTGAATATTATGATTGTCTGAGTAATGTACAATAGTTA
>1370 a11igrp_1814
AAAGTATATAGTTATACATTCTGTGTATCGACTAAATATACCCATTCTGAGTACCTTGCCTGTTGCTTCCATGGAGCCTGACCGATGTCACTCTGGGGATTTACATCCCGAGGGAGCCTCCGTGGAAGGTAATCAATTAACTCTTGAATCCAATGTCATCTGTCTGATAATGTTTATAACAAATGTTA
>1371 a2igrp_8919
GAGATGTGCGCGAGCACTTTCCTTCACACACCTGTGCACCGTGGTCTCCGGACCTACAAACTTGTAGTCATGAACGTCTTGATGATAACAAAATA
>1372 a2igrp_6090
AAGATGTGCGCAAGCACTTATCCTTCATACACCTGTGCACTGTGGTCTTCGGACCTACAAACTTGAAGTCATGAACGTATCTTATTATAACAAAATA
>1373 a11ogrp_557
ATAATGCCCTCTGATTTCGGTCAGCTGGGTTCAATGTGTGCCATCTCTTCGGAGGTGGCCATCCATACACACCGTGAACTGTGGCTTCGGCCATCACAAACTATTAGTAATGAATGTAATATCATAACAAAACA
>1374 a2ogrp_15032
CCAGAGTGCCCTAGGCTCTCCAACCCATTGTGAACTTACCAAACGTTCCCTCGGCGGGCTCAGCGCGCGGTGGCCTCCGGGCCTCCGGGCGTCCGCCGGGGAAAACCAAACCCTGATTTAATCGTATTTCTCTGAGGGGCGAAAGCCCGAAAACAAAATGAATCA
>1375 a14igrp_19036
CTGAGTGAGGGCCCCTCGGGGTCCAACCTCCCACCCGTGTTTAACGAACCTTGTTGCTTCGGCGGGCCCGCCTCACGGCCGCCGGGGGGCATCTGCCCCCGGGCCCGCGCCCGCCGAAGCCACCTGTGAACGCTGTCTGAAGTATGCAGTCTGAGACAATTATTAAATTAATTA
>1376 a14ogrp_3245
ATGAATTGTTAGGACGCTCTTTTTAGAGGTCCGACCCCTTCATTTCCTTACACTGTGCACACACTTCTTTTTCACACAATTTTAACACATCAGTTTAAAGAATGTAAATAGTCTCTTAATTGAGCATAAAACAAATA
>1377 a7igrp_12238
CTGGGTCACAGGGCGCTCCGGCGCCCGTCACCACCCCCTGCTTCCCGCCCCCTTTCGGCGCGATGGGGTCCCCTCGCGGGGCCCCCTGCCGGAGCCCAAACCCTGAACGAACTTGCAGCCTGAGTAAAGAAGCAAATAATTA
>1378 a20ogrp_1384
CTGGGTGGCTTCGGCCTAAACCCCCAACCATTGTGAACACTACCAGTTGCTCAGCAGGCTGGTGGCGGTGTAACAACTGCCCTGCCTGCGGCACAAAACTCTTCTAATGTCATCTCTGAGTTACTTTTAAATAAGTTA
>1379 a2ogrp_9972
CCGAGTTTACAACTCCCAAACCCCTGTGAACATACCACTTGTTGCCTCGGCGGATCAGCCCGCTCCCGGTAAAACGGGACGGCCCGCCAGAGGACCCCTAAACTCTGTTTCTATATGTAACTTCTGAGTAAAACCATAAATAAATCA
>138 a14ogrp_3327
CAGAGATCATGCCCTTCGGGGTAGACCTCCCACCCTGTTTAATTACTATTGTTGCTTTGGCAGGTTGCCCTCATCATGGGGCGTCCGGGTTCCGCCCGTGTCGTGCCTGCCAACAGCCCCCCAACTCTGTGTTTAGTGTCGTCTGAGTACTATATAATAAGTTA
>1380 a10igrp_5560
ATAATAAGTGCTCTACTGCACTTTTTAAACAAGTACTCACCTTGTGTGCAATGTTTGCTGTCGTGTCGTTCACGCGTCGCGTCAGCTTAATACCAACCTTTTATTGAAACAATTTTGTCTGAAGATATTTTGAATAAATAATTCTAAATA
>1381 a2igrp_15289
TTGAATCCTCAGGATGTCGCTGGCCTCTTGCAAGGGAGGCATGTGCACTCCGCCTTTCATCCACCTGTGCACTTTTTGTAGGTCAAAGGGGGAAACCCCTTTGCCTATGCTTTTACACACACTTTTAAAGTATCAGAATGTAACACAGTAGACCTTCAGGTCGAAATAACAATA
>1382 a19ogrp_6631
AAGAGTTTAGAGACCTCGGTCTACAACTCCACCCTTTGTTTACAATACCATTGTTGCTTTGGCAGGCCAGTCGCAAGACAACCGGCTTTGGCTGGTCAGTGCCTGCCAGAGGACCTAAAACTCATGTTTATATTATTGTCTGAGTACTATATAATAGTTA
>1383 a4a_10991
GTGAACGCAGCGAAAGCTGTCTACACAATATACACTGTGAACCGTGGCTTCGGCCTATTCAAACAATGTCGTATGAATGTAATCAATTATAATAAGAAA
>1384 a8j._678
CTGAGCTTCATTGCCTAAGGAAGAGTCTTCTGACTCCCCTTAGGTGAGAACTCCACCCTTTGTTTACATTACCTTTGTTGCTTTAGCAGGTCCGCCTCCGGGCAACCGGCTTTTCTGCTGGTTAGTACCTGCTAAGGGACCTAAAACTCTTGTTAATTATGTCGTCTGAGTACTATATAATAGTTA
>1385 a5i_26017
CCGAGTTTACAACTCCCAAACCCAATGTGAACGTTACCAAACTGTTGCCTCGGCGGGATCTCTGCCCCGGGTGCGTCGCAGCCCCGGACCAAGGCGCCCGCCGGAGGACCAACCAAAAACTCTTTTGTATACCCCCTCGCGGGTTTTTTATATCTGAGCCATCTCGGCGCCTCTCGTAGGCGTTTCGAAAATGAATCA
>1386 a1l._25975
ACAAATCATGGATGGTGGTGTATGGATGTGTCTAGTGCACATTTGTCCCATCAAACAAAAACCCGAACCCGAGCAGTAAAATGCCGGGCTTGGATGCTAGTCCGATAGAACTCGCGTAGGTCTATTGGACGGGCAAAATAAACGCTTTTTATTGTTTGACAGTTTACAAGAGTGATACAAAAAGTAAATA
>1387 a8ogrp_19399
ATGAATTCAATTCGATCGTCTGTGCTGGCGGAGACGCATGTGCACGTCGATCGTAATTCCATCCTCCTCCCAATCGTCCGAGTGCGTGTCAGGTTGTGGGCCCTTCTTGGGTCCCTTCCTTGGATGCGCCTCGGTAATTTTCACCCACTCTGGGTATTTGAAACGAAGAACGTAATACAAACAAACTTAA
>1388 a20ogrp_28344
CACAAATATGAAAGCAGACCCTCACTGGGGCGTAACCTCACGCCGTGTCCGCAATGGTGCATTCGCCGTTGTGTTGACGCGGCGGCGGGGTACGTTCTTTTGAGCCAGTCTGACTCCATATTCACCCATGTCTTTTGCGTACTACTTGTTTCCTTGGCGGGTTCGCCCGCCAATAGGACCCAATTAAACCTTTTTTGTAATTGCAATCAGCGTCAGCAAAACAATGTAATAAATTA
>1389 a15igrp_39
GTGAATTTTGAGTGTCTCTTCCACAGAGAGCTCGTCTTCCACTTTTAAACCCTCACTCGTCTTGCTGTTCAAAGGCAGACGTTGGGAACTTTTTTAACGGCAAGTATAATGAATGTAACACAAAGTTTATAACAAATTA
>139 a8d_8515
ACAATAAGTGTTTTATGGCACTTTTTCAATCCATATCCACCTTGTGTGCAATGTTGTCTTGTAACGCGAATGCTTGTCATTTGCGCTACAGGATGTAAACATCAACTCTTATTTTTAACAACTTTGTCTGAAAACCTGTATGAATACTTAATTCAAATA
>1390 a11ogrp_8280
ACGAAAGATAAGAAGCGCTCTTTTTAGAGGCTTCGTCCCCTTTCAAACACCTGTGCACTTGGAGCTGTCCATTCGACCGGTCTCGGTTGGGGTCTTGTGCCCGTCCCGAGCCATCCGTCGGTGGGCTACCTCCGCCTTTTACCAAGCACCACAAGTATTCTGGATGCAGTTGAAACTTTGACAAACATAACA
>1391 a5igrp_6859
ACAAATCGTGAGGGGAGGGGGAAGCCTCTCCTTGAACTGGGCGCCCGTGAGGGGGCTCTAGCCACGGGACAATGTCTCTGGGCGAAATAGACGTGTTGGTTGTCTTGGGTGGTTATTAGCAATAGTA
>1392 a1l._21128
CTAAATCCAAACCCTTTGTCAAGGAGCTAGCGCTCCGAGGCAATTCCACACCAATGTGAACCAAACTGTCTTTGGCGTTGTTGTTTCCTTGGAAATGCAGCGCCGAATATTATTAAACACCGTATTCTTTGGACTGATGTATCATTCGACTCGTGTCTTCGGACAGGAGCTGAATAAAGCCTAATGAGATAA
>1393 a7igrp_3427
CGAGAGGACACTGCAAAGCACACCACAACACTGTGTTACTGAGCGATGAGTGCAGTACATTGTGCTGCACACGTCTATTGACACCATGCAAACTGAACTAGCTGAACAGCAAGCAACCAACAAACA
>1394 a1igrp_18612
CTGATTTTGGGTCGCAAGGCCTTGAAAGATCAATATCCCATACCTGTGTGAACTGGTCAGGCCTTCGGGCCTGACAACCACCCCAAACAAGGTGTATTGAACGTATGATGATGCAAAAACCTAGTA
>1395 a2c_24116
AAGAATACCGGGCCCTCCGGGGCCCTCATTCTAACCCTTTGTCTACCTAACTTTGTTGCTTTGGCGGTAAAACGCCAGAGGACGAAACCCTTGAATCTCTGCTGTCTGAGTATTATATAATAGTTA
>1396 a4a_8800
ACGAGTTAGGGTCTTCTAGGCCCGACCTCCCAACCCTATGTTTATTGAACCTCTGTTGCTTCGGCGGACCCGCCTCACGGCCGCCGGAGGACCGCTGCAAGGCGTCCTCTGGCCAGCGTCCGCCGATGGCCAACCACTTAAACTCTGAATGAATCGTGTCATATGTCTAAGTCTATGATTAAATTAAAGCA
>1397 a4a_11417
AAGATGTGCGCAAGCACTTTTTATCTACACCTGTGCACCGTTGGTCTTCGGACCTTTCACAAACTATTAGTCATGAATGTCTTATTGTAACAAAGAAA
>1398 a2c_19741
GTGATTTGGCCGAGAGGCCTTACAACATCATCCTCACACCTGTGAACTCGTTCGGGCCGGGTAAGACCGGTCCGAAACCTTTACAAACATATGTGTAATGAACGTATAAAACCTATAACAAAAACA
>1399 a14ogrp_20946
CGAATCGTTGGTTGGGGTTGATGGGCTTTTTGGTCAGTCTTCCCTCCATATGGTCTCGGATCAATTTTGGTCCGCTTGACATTAACGCATGTATTGTTTGTCAAATTCAAATGAGAATCATCAAGA
>14 a10igrp_2030
CTGAATTGTCAAACGGGTTGTTGCTGGCCCTCATAGGGGGCATGTGCACGCTCTGTTTACACATCCACTCACACCTGTGCACCCTCTGTAGTTCTATGGTCTGGGGGACCCTGTCTTCCTTCTGTGGTTCTACGTCTTTACACACACACTGTAATAAAGTTTTATGGAATGTACATCGCGTCTAACGCAATACAATA
>140 a8ogrp_696
CAATACTTTGAGAGAGCGTGCGTGCTGTTTCGTGCAGTGCGCGGTGATCTACATTAGCACAGGGTCGCAAGACTCTGATGTTTACGCTTGTTTGTTTGGACAGAGTTAGTTGAGAAATAATAAAGA
>1400 a4a_3510
ATGAGACGTGGGAAACCACGCGGGTCAGCCTCGTTCACGCGAGCAGCCGCCCGAATCTCCAACCCTTTGTTAAACGTACACGTTGCCTCGGGGGCTTCACCGCCCCCGACGGACACATCACAAAC
>1401 a11ogrp_16366
AAATGTTAGTGTTGGTTTCAAACCCAACTTAACTTACCCCACCCCTATTATACCTCCTCTGTTGGTTCATGAGACGTGGAACTTGATCAATTCCCCCCAGGATTCGCCCTTAGGGGTGTCTGGGTGATCTCATGAACAATTATTTTATAAATCTACCCTGTTTTAGTCTGATTTGAATACCAAAAACTACA
>1402 a20ogrp_1800
ACTGTGCTTATGCATCAGTCTATCTGTGAATTGCCCCTTGGGGTGCTGCTTGCGGCTTATAAACATAAGAAGATTGTTTGGTTACTCTGTAACAATTA
>1403 a13ogrp_16801
ATGAAACTTCTAGTGTCGAGTGCTGTAGCTGGCCTTTCGGGGCATGTGCACGCCTCTTCGCGAATCCACTCACACACTGTGCACCCTTGCGTGGGTCGGTCTGGCGTAAAACCCCTGCCGGCTCACGTCTTTTTCACAAACCCCTTGTATGTCTTCAGAATGTCTAGTGATGTTAATAAACGCATCTAATA
>1404 a11ogrp_16324
CCGAGTTTACAAACTCCCAACCCTATGTGAACCTTACCAATCGTTGCTTCGGCGGGCTTAGCCCCCGCGCCGCTCGCCGGCGCCGGGATCAGGCGCCCGCCGGGGACCCCAAACCCAATGTTTTTCATGCAGTATTTCTGAGTGGCAAACGCAAAAATAAATCA
>1405 a2ogrp_10261
TCGAGTTTTCAACTCCCAAACCCTATGTGAACTTACCACACCGTTGCTTCGGCGCGCGCTCGTCGCCGCCGAGGACGTTAAACTCTGTCTTGTATAAGCATCTCTGAGTGGCCGAAAGGCAAAAAACAAATGAATCA
>1406 a6ogrp_22318
CCGAGTGAGGGCCCCCGGCCCGACCTCCAACCCTTTGTTGACCTCAACACCTGTTGCCTCGGGGGCGACCCGGACGCCGACGCGTCGGCCGTCGGGCACCCCGGTGGACCGTTCCAACTCTGTGTCCGTACGTCGGAGTACTTTGCGAATCAATCA
>1407 a2b_2348
AAGAATTTAGGCTTTGCCGCCATATTCTCACCCTTTGTCTACTATACTATGTTGCCTTGGCAGGCTGTTACACGCCTGCCAGTGGACTTTAAACCCTAGAATCTTTGCTGTCTGAGTACTATATAATAGTTA
>1408 a20ogrp_7249
CCAAAGATGGCGGGCCTCCGTGCCCCCGTCCCCAACCCATTGTTGACCAAAACCCTTTTGCCTCGGGGGCAGAGCGTCCGCCGCCGCCCCCGGAGGACCATTTAACGCTGTCTCTTTGCGTCGGAGTATTGATTAAATAAATGA
>1409 a12igrp_32605
CCGAGTTTACAACTCCCAAACCCATGTGAACATACCTACTGTTGCTTCGGCGGGATTGCCCCGGGCGCCTCGTGCGCCCCGGATCAGGCGCCCGCCTAGGAAACTTAACTCTTGTTTTATTTTGGAATCTTCTGAGTAGTTTTTACAAATAAATAA
>141 a9c_2230
GTGAATTGCTCTCTGAGCGTTAACTATATCCATAACACCTGTGAACTGTTGATTGATTTCGGTCAATTACTTTTACAAACACTGTGTAATGAACGTCAAGTTATTATAACAAAAA
>1410 a1ogrp_14290
CAGAGTGTAAAAACTCCCAAACCCCTGTGAACTTACCAGTCGTTGCTTCGGCGGGATCGCCCCGGGCGCCATCGCGTGCCCCGGAACCAGGCGCCCGCCGGGGGACTCAAACTCTTGTTTTACTTTAGTGGTATTCTCTGAGTGGCTATATGCAAACAAATGAATCA
>1411 a8ogrp_15567
GTGAATTAACGGATTCCTCTGCAAAGAGAAGGTCCGATCCACTATCACACACACTTGTGCACTTGTCATTTTACAAATTCATTTTTGTATTTTACACACTTTGTATGGAAAACCGTTTATTATAAACTTTTGGTAAAAGAAAGAA
>1412 a13igrp_15117
GTGATTTGGCCGAGAGGCCTTAAAACAATTCATCCTCACACCTGTGAACTCGTTTGGGCCCGGTTGACGCCGGCCTGAAACCTTTACAAACATTATGTGTAATGAACGTGTCATACCTATAACAAAAACA
>1413 a13igrp_21551
GTGAATCAAGAGTGCTCGAAAGAGACTCGTTTCATTTCCACACACCATAGTGAACTTGTCCTAAGCAACGTCAAGCCCTTACGGGTCTGACGTTCTTACCTTTATCAACCCCTTGATTGAAAAGAGATGATGATGTAAAATTTGATTAAAACCATGA
>1414 a2igrp_4715
CCGAGTTTACAACTCCCAAACCCCTGTGAACATACCTTCTGTTGCTTCGGCGGGATCGCCCCGGCTGCCCTTGGGCTCCGGAACCAGGCCCCCGCCGCAAGACCTGAAACTCTGTTTTTACTTCAGTATCTTCTGAGTGGCTTTTAAAGCAAAAAATAAATTA
>1415 a11ogrp_14007
GTGATTTGGCCGAAAGGCCTCATTTCGATTCTCACCAACACCTGTGAACTGTAGGGGCCTCCGGGCTTCCCAAAACATATACAAACATCAGTGTAATGAACGTCAAATGTATCTTAACATAAATA
>1416 a20ogrp_9327
GAGAGAAATTGCCCTTTGGGGTACATCTCCCACCCTGATTATTTTACCTCTGTTGCTTTGGTAGATGCTTCTGTAGCTACCAGAGTGTAATCAAACTCTTGTATATATATATTGTCTGAGAAAAACAAATATTTA
>1417 a14igrp_26181
ATGAAACGAACCCTCGGGGGGTTGTGCTGGCGCCTCGGCGCAACGTGCACGCCCCCTCTGGCGTTTAGACCCCTTCACACCTGTGCACGAACCCGTCGGACGGGGGTGGCGCCTCGCGCGCCCTCCGGTCCGGCCCCTTCACATCAGCTTACGAACGTACGTCGAATGCATCATTGCGCATGCGCAACCGAAATA
>1418 a8l_13511
CCATTATAGACCACGGGGGAGGGCTTTCCGACATTAATTCCAGGACAGTCAGTGGATGTACGGTTCCACTGGCTGGGGCGGAACACAAGGGAGAATATGCAAGCCGTTAGCTACTCGGAGCGCTGTTCAACCGCCGCCATTCGAGCCCGAACCTGAACCCCACCCTTGCTTTTTGCGCACCCATTGTTTCCTCGGCAGGCTTGCCTGCCAGCAGGACCCCATTCAACCCTTTGTAGTTGCAGTCAGCGTCAGAAAACAACGTAATCGTTA
>1419 a2j_29406
ATGAATAAACTTGGTCGAGTTGCTGCTGGTCCTTCGGGGCATGTGCACGCTCACCACCTTTATAACCCACCTGTGCACCTTTTGTAGACTGGAAACGTTTCTCGAGGAAACTCGGATTGAGGACTGCTGTGCGTAAGCCAGCTGTTCTTGTGTTTCTCAGTCTATGTTTTTCATATACTCCAAATGTATGTAACTGAATGTATTGCTGGGCCTCAGTGCCTTTAAAACAAATA
>142 a1igrp_6039
AAGAATACCGGGCCCTCCGGGGCCCCCATTCTAACCCTTTGTATACCTAACTTTGTTGCTTTGGCGGTAAAACGCCAGAGGACCGAAACCCTTGAATCTCTGCTGTCTGAGTACTATATAATAGTTA
>1420 a2i_29431
ATGGGTTGTGAAGGGGTTTGATGCTGGCACCCAAATGCATGTGCTCGCCCTGACGATCATCTTCCAAACACCTGTGCACATTTTTGAGGGAATTTTGAGTTGATTACCATTTTTGGGTGATTTTCTTGTATTCCCTTAAATTACTATACGCTGATAACAATGCTGAACGTGTTTTGTGCCGCAAGGCCATTAATAATATA
>1421 a8j._5231
CTGAGTTAGGGTCTTCCAGGCCCGACCTCCAACCCTCTGCCTACCTTACCTCTTGTTGCTTCGGCCGGCCCGTCCCCCCTAGAAATAGGGGTCGACCGCCGGAGGGCTCACACCCTCTGGTCCGCGCCCGCCGATGGCCCTCAAACCAAAACTCTTGTTCAATCGTGAATTGTCTGAGTATACAAAACAAAATAAACCAA
>1422 a20ogrp_15546
AAGAGTAAGGGTGCTCAGCGCCCGACCTCCAACCCTTTGTTGTTAAAACTACCTTGTTGCTTTGGCGGGACCGCTCGGTTCCGAGCCGCTGGGGATTCGTCCCAGGCGAGTCGCCCGCCAGAGTTAAACCAAACTCTTGTTATTAAACCGGTCGTCTGAAGTTAAAATTTTGAATGAATACA
>1423 a8igrp_20383
AAGAGATAGGGTCTTCACGGCCCGACCTCCAACCCTCTGTTGTTAAAACTACCTTGTTGCTTTGGCGGGACCGTCTCGGTCTCCGAGCGCACTAACCTTCGGGTTGGTGAGTGCCCGCCAGAGTCCAACCAAACTCTTGTATTAAACCAGTCGTCTGAGTATAAAATTTTAATTAAATTA
>1424 a15ogrp_6872
TTGAATAAATTTGGTGAGGTTGTTGCTGGCTTCTAGGAGCAAGTGCACGCCTACTCCATCTTTAACCACCTGTGCACCTTGTGTAGATCTGAAAACTCTCGAGGAAACTCGGTTGGAGAATCGCTGTGCGAAAGCCGGCCTTTCTTGTATTTAGCTCTATGTTTTACATATACCCCATATGAATGTATCTGAACATTGTAATCGGCCTTTGTGCCTTTAAACTAAAA
>1425 a11igrp_5806
ACGTATCTGCCTCGGGGAGTGAGGGTGGCCTGGCTCCGGCAAATTGCCGTGCAGCGGGCCCCTTCCCCTCGAACACTACAAACCCACTGTGCACCTTTCGCGGTGGAGGGTGCGGCGTGAGCCTGCCCGAAGCCGCGGTCTCACAGACTCGTCTCAGAATGTCTTGCGGACTCGTTCCGCCCATAAACGTAA
>1426 a18ogrp_19686
GCGAAGTCGAGTCCCGTCTTAGTAGGATTGTAGCTGGCCGGCGACGGCAAGTGCTCGTTCGAAAGGTCGGGACCTTCACTACCACACCCCACCGTGAACCAAGCGGGAGGTCGAAAGGCCTCCTGCAAATATACCATATACCCCAACGAATGTCATGGAATGTCTAGCGTTAATTCGCAAATATA
>1427 a11ogrp_22193
ATGGAGGTTTGTTTAATTACATTCCTTTTATCAGGGGGTTGTACTTTTTATCGAGTACAATCTTCGTCAAACACTGTGTTGTTGACAAAGTTTGTATGTTTCGGTGTCTTGAAAAAGACACCGACAGCATCATCATCATCATCATCATTTCACCGCTTGTATCAATCGATAACATTGTCACCTGATTATTATTACTATTATATATCACAAAA
>1428 a5c_24510
GAGATTCGTGGCGAAAGCCACAACCACACAAACACTGTGAACTGTGGGCCTCGGCCCCTTACAAACTATGTTGTATTAGAACGTAACACACATGTAACAATGAAA
>1429 a15ogrp_9801
TTGAGTTACTGAACTCCAAACCACTGTGAACTTACCACTGTTGCTTCGGCTGTTTCTGTAGTCTATGATTTCAGATCTAGCCGAAGGTTTTTAACTCTTGTTTCTAATAGTATCTTCTGAGTGGGTACGCAAATAAATTA
>143 a7igrp_27852
CCAAAAGATAATCTTTCAACACTGAAAGATCTTACCTTTGTGCTGGCTTTGACAGTTTTGTACTTTTGGGGCTTTAAAATGGTTCAGTAGTTAAAGGAGGGAGTAATCCCTTTTTCATGCTATTGGGTCGGCCCCAAATAATCATATCATCCTTTAAAATTTTTTCTGATTAATTAACACATGATTTTAATAATCTGTTTAAAA
>1430 a9ogrp_27288
ATGGATTATTTGGCTAGGCTGCTGCTGGCTCTTTTAGCGGAGCATGTGCACGCCTTCCAATAGTTATTCATATACCCCATGTGCACCTTTTGTAGGCTAAGAACATCTCTCAAGAGGGAAATCTCTTGGACTTTTGGGAACTGCTGCGTGTATTTAGGACCAGCTGTTCTTGTGTTCCTAGTCTATGTCTATTCTACAACACCCCATATGCATGTAACAGAATGTGGTTTAATGAGCCCTTTGTGGCTTTAAAAACTAATA
>1431 a9ogrp_28131
AGAGGTTAGCAAACATCCTGTTTGACAAACCACTGTGGTACGATGCATGTTGTTTTGGCGGCGTGGTGTGCGTGCAAACGCGCATGCGCCGCCAGCATACAAACCCAATCAACCAATTTTATACTACTCAGCTGTTCTGATTACACTATTTCGATAGCATAATCCTATA
>1432 a2j_18426
CAGAGTTGCAAAACTCCAAACCCATGTGAACATACCTCGTGTTGCCTCGGCGGCGAGCGTAGTGCTCGGGAGGTGCCTACCCGGTACCTACCCTGGAGCTACCCTGAAGCCTCCTACCCTGGAGCTCCAGGGTACCTACCCTGGAGTCACCCGGTAGTAACCTACCCGGTAGCTACCCTGGAGGACATGCGCATCCGCCGGAGGACCACTCAAACTCTTGTTTCTGTGTGGCACATCTGAGTAATTATACATAATAAGTCA
>1433 a9igrp_10825
CTGGGTTTGGGTCTCGTACCCGCCACCCACCCTTTGTCATGAGACGCGCAAGCAACTCACATCGCTTCGGTCCCGGGTCGTACCCCTACTCGTGAGGGGTATACCCCGCGGCCGGCATTGCAAACCCAAGTGGAATTTTGAAGTCTGATCAAATGATAAACGAAAAGCA
>1434 a2j_9451
TAGAGTATAAAAACTCCCAACCCATGTGAACTTACCACGTTGCCTCGGCAAGTCTTAGCGAACGAATCGAGCCCCTCGGGGCCCGGTGAGGGAGCGAACCGCCTGCCGCTGGCCCCTAAACTCTTGTTTAATTTTGAAATTCTGAGTACATAACTAAATAAGTTA
>1435 a2igrp_7869
AAGAGAAGGGGTTTGCCCCTGAGCCTTCGGGCTTACTCTTCACCACATGTTTACTGTCTTCGTTGCTTTGGCGAGCCTTCTCTCCGACATCGAATTCTCGATGAGTGCTCGCCGAAGGATCTTAAATTCTTTTTAATTGCAGTCTGAATATCAAACAAATAATCA
>1436 a9k_18615
AACTTTATATCACGGGGGCCGGCCATGAAATGCTAGTAGATCCATTGTGAATGGCTATCGGCCATATTCCAATTTGATACTCGTAGCTCCTTTGGGAGCTCAGCATTTCTCCCCGCCCTGTCTGCATATTACCCATGATTTTTGCGTACCCATTGTTTCCTCGGCAGGCTTGCCTGCCAGTAGGACCCTTTTAAACCTTTTGCAATTGCAGTCAGCGTCAGAAAAACTTTAATAGTTA
>1437 a14ogrp_8708
ACAAATCTAAAACAACTGCTCTCTTCTCCTTCCTTGTGTGGGGGAAGAAGCAGAACTTTCTAACCTGTGAATCGGCAGTCTCGCAAGAGCTGTTTGCGTTTTGGTGTTGGGTTGCTTCGGCGACTTCAGCCAAAACTGCACACATAAACGTCTAACAAAATTGTCTAAGCATTTTGCATAAAACAAAAA
>1438 a19ogrp_25019
CTAGTTGGCGAACCGAGCGTTAGCGAGGTTTCGCGATCATCTATATTTAAAACCCACTCTTGAATGTATAAAATTTTTATGTATTAATGATAAAATAAAAGA
>1439 a4ogrp_4347
AGAGAAACGGACCCTTAAGTCCGAATCCAAACCTTACATCCCCTGTGAACCTGTCCACGTTGCTTCGGTGGGGCAGCGCCCAGTGCGCCCGACTGTCGGGTTAGTAGCCCGGCGGTTGGAGTTACCCGTCAGAAGACCTCTTAAACTCGTGTTTTTTATGCAATGTCTGAATAAACATGTAAACGTTA
>144 a9igrp_14853
CCTTTGGCTGCCGTGAGCGCTTCGGCGTGAGCGACAGTCATTCTATAGTGACGCCTCTGTGTCCGGGAAACCGGCGCGGGGCTGACCTAACCCTTCTCTACGAGTACCTATTATTCTCCTTCGGCGGGGTAACCCGCCGCTGGAACTTAAGAACCAACTTGCATTTAGCATTACCTGTTCTGATAACAATTAATTATTA
>1440 a13ogrp_13118
CAGTGTTAGGCTTCGGCCTCATTCACCCCCCTTGTTGAACCACTGGTTTCTTTGGCGATGTCATGGACTCGTCAAACTGTAAAACTCGGAAAATGCGATACTGTCCGAGTGAGATTGAATTATCA
>1441 a9i_466
CTGGGTTTGGGTCTCGTACCCGCCACCCGCCCTCTGTCATGAGACGCGCAAGCAACTCACATCGCTTCGGTCACGGGCGCTTCCCCTACTCGTAGGGGGTGCCCGCGACCGGCATTGCAAACCCAACCGGCATTTTGAAGTCTGATGGAAAGATAAACGAAAAGCA
>1442 a13igrp_13176
TTGAAGAACAAGAGCGCACTTTATTGTGGCTCGAACCCCCTTCATATCCACCCACCCTGTGCACTGGATACTTTTTATTTCAGACTCTACAAGTCAATGAATGTACCACTTTAATAAAGTAAACA
>1443 a15ogrp_6258
CCGAGTGAGGGCGCCCGCGCCCGACCTCCAACCCTTTGTGAACCGACCACTGTTGCCTCGGGGGCGACCCGGCCCTCCGGCGTCGGGCCCCCCGGTGGACCCATCAATAACTCCGCGTCTCTGCGTCCGAGTCTCATGATAAATCAATCA
>1444 a9igrp_5809
CAAATCTTTGGAGGAGCTGTGTGCCGTTTACGGTGCGCAGTGACTCTACATTAGCACAGGGTCGCAAGACTCTGATTCGTTTACGCTTGTTTGTTTGACAGAGTTAGTTGAGTAATAATAAAAGA
>1445 a120grp_6738
CAGAGTTCATGCCCCTCGGAGTAGATCTCCCACCCGTGTGTATCATTATCGACTGTTGCTTTGGCGGGCCGCGTGCCTCGCACGCCTGGACTGCGGTCCGGCGCGCCCGCCAGACGGACCCCCAAACTCTGAATGTTAGTGTCGTCTGAGTACTATTAAATAGTTA
>1446 a1l._14043
CCGAGTGAGGGTCCCTTGCGGGCCCAACCTCCCACCCGTGTTTAACTGTACCGTGTTGCTTCGGCGGGCCCACCGGGGGCCCTGTTCCTGGTCGCCTGGGGGCGTGAAACCCCCCGGGCCCGCGCCCGCCGGAGACCCCATTGAACCCTGAGTGAATCGAGTGTCTGAGTGTGATTTTTAATCATTA
>1447 a16ogrp_6930
GTGAAAACTGCCTCCGGGCACATGACAAAACCCTGTGAACCGTGGCCTCCGGGCCGTTACAAACATATCTGTCCTGAACGTCACATCATATGAGAAACAAATA
>1448 a8d_27410
ATGAATTTGGGTACTCTTAATTGAGGCCCGACCTTCATCCTTCTACCCTGTGCACTATTTTTGATTAGTCTCGGTTGTAATGACCTGAGTACTGATTATCATTTTTAAACTCTACAAGTCAAAGAATGTATCAAATACAAAACAAAATA
>1449 a11igrp_24531
ACAAATCAGCTTGGTGCTTGTGTGGGCTGCAAGGCCCCACAGCCCATATCAACCCGAGCCCGTGCAGCGATGCCGGGCAAGGTGTGTGTGTGTGGTTGGTGGCAGTGGTGGAGGGTCCTTGTGCTTAGAAGACTAAAGCCTCATCTCATGCTACACGCGGTAGAAGGTCAGTCGCCCTCGGCATATGGACCCGATCCACATAGACGCTTGTATGTTTGACAGAGTTAGTTGACATTACAAAATGAC
>145 a16igrp_13865
TCAAATCAATTTGGTGCGGCCAGGGAGAGATCAAGAGCAGTCTCGGTTGATCTCGATCGATCTCGGTCAATCCTAATAAGGTCGGGGTGCAAGCCCTGTATCTATTCACGCTTGTATTGTTTGACAAAGTACAATTGACAAATTAATAGA
>1450 a4l_15619
GAGATGTGCGCAAGCACTTTTCCCTTCATACACCTGTGCACCGTGGTCTCCGGACCTACAAACTCGATAGTCATGAACGTAATTTATTATAACAAATA
>1451 a9igrp_16590
CGCTCTGTGCCGTACCTTTGGGTGGCTACACCCATTGGTTATAGCCAGCAAACCCTTGCTCATTATTACCCCTTGTGATTTCCTCGGCAGGGACGCCTGCCGACGGAACCCATTTAACTCTTCTGTATGCAAGCATTACATTATTCAGAATTATCAAATTATTA
>1452 a10ogrp_6541
ACAAATCGTTTGTATGGCTTCGGCTATACATATTCACCCCAAGCCTGCTAGTCAGGCTTAGGTTAGGCCGGTATACTTGTGTACTGGCCACATAGACGCTTGTATTGTTTGACAGAGTATAGTTGCATCAAAAAATGA
>1453 a13ogrp_10334
AGGAGAAATGGGAGAAGTTTATGGTTACTAGTTTATAATTAACTAGCAAGAAAAGGTTTACACAGTGACAATTACAGAAAGATACGAACATTAGATGAG
>1454 a13ogrp_26405
GAGATTGGCGCTCGGGCTACCCGCCCGGCGTATGCCAACATCCATATACACCTGTGAACCTGTGGCCTCCCCTTTGGGGTGAGGACTGCAAATCTTTACAACTCTGTGTAATGAACGTAATGTATTATAACAAAAACA
>1455 a14igrp_8612
TTGAATTCCAAACGTAAAGGACTTGTGCTGTGCGCTTCGGCTGCACGTCTTGTCCGATACATTTACACCTGTGCACCTTTGACCCGCATATAGTCGGGTCCTTACACACACTTTTAAAATCTTAGAATGTTTTATATATTAAATTATGA
>1456 a15ogrp_14273
CCGATTTTTAGCGGACCTGATCTCTGGTCATGGTCTCGCGAAAACTTGTATTTAAAACCCCACTCTTATAAATTGAATTATGTATAATAGTAAATAAATAAAGA
>1457 a2c_8946
TGAATCGAACGAGTAACCGAGCGAGCGAAGCGAGCACGGTTACGAGTGTACCTGTGAATTACCATGTTTGGGTGGTCGATGTCGAGCGTCGAAGACGTGAGACATTGACCGATTGCTGATGAGTTATCATTAGTACATCGGAGCCACCCACTATTACCATATCCCGTCTGAGTACAACTAAAGTA
>1458 a11ogrp_1372
ACAAATCCATCTTTGCTTTGGGGTCTGCTCCATTGCAAATATTAGTCCGCCGGCCTCTCCTTTTTCTTTTAGGAGGAGGAGGGGGGCTGGCAGATTGCTATATATAAATTATGTTGTGTAGACTGTGTGTGTAACTTTAAAATTATTGA
>1459 a13igrp_13
GTGATTGGCCTCTGGCCTTAATTCATGTCCAACCTCTGTGAACTGTGGCCTCCGGGCCGTATTTTAAACATCAGTGTAAAGAATGTAAAACATTAGAAAAACA
>146 a1igrp_12441
ATAATGCCCTCTGACTTCGGTCAGCTGGGTTCAATGTGTGCCATCTCTTCGGAGGTGGCCATCCACACACACCGTGAACTGTGGCTTCGGCCATCACAAACTATTAGTAATGAATGTAATATCATAACAAAACA
>1460 a15ogrp_30973
CCGAGCGAGCGCCCTCGGGCGCGACCTCCAACCCTTTTGTGAATCCAACCTCTGTTGCCTCGGGGTGACCCGGCCTCGCCCGGCCCCCGACGGACGATTCGACCCAACTCTGCGTCTTTGCGTCGGATATGAAAAGTCAATTGATTTTA
>1461 a5d_22982
CCAAGTATAGGAAGGCCCATTCACGTGCCCGGTTATTCCAGGTGCGGAAGGGGGCCCGACCTCGAATCTCTCTCTGCGTACGACTCCCTGTTGCTTCCCCGGGAGGGCGACATGCCACCC
>1462 a15ogrp_12036
ACGAATCAAAGGTCTTCGAACCGATTCTCTTACACCCGTGCTCTTGTCCATTTATGGGCAAATGATTTTCTGCATTTACAGTCGTCTGAGAAATCCATCCTTTTAGGATGTAGAAGAAATATGA
>1463 a7igrp_11787
AAAGATTCAAAACAATCATGTTGTGTCTGGAATGTAGTTTGGCACTGACGTGTTTTTTCACTCAGTGTCAAAAGTTCAAGTGAAAACTCGTCTGACTGACCCATTGATATACAGTAATTAAAA
>1464 a19igrp_11639
AAAATTCCAACTAAAAGTTAGCTAGCCTTTATAGGCTGCTAATCTTTTAAACCCTTGTGAACTGTTTATTGTCTATGGTGGGTTAAAAGATCTCTCTTTCTCTTGTAGTTAGTAAAGATTGGCTTTAACCAGCTACCCACCTATTTATTAAACACCTTAAATATTTTTTAGTCTTTAACAATTCTATTTTGAATTCATTGAATTTAAAAA
>1465 a18ogrp_18132
GTGAATATTAGGGTGCTCTCATTGAGAGACCTGACCTCCACTTTTCAACTCTGTGCACTCATGGCAAATATTCTCCGGAGATGAGTCTTCATTGACTCTGAATCGGATGAATGTTTGCGGCTTTACTTTATTAACTCTAAGTTAAAGAATGTAAATAATCATAACAAA
>1466 a10igrp_856
CAAGTTCTGTAGGTCTGTCGCAAGACATGACTTCTATATACGCGTCGTTGTGTTTGACAGAGTTATATGAGACGACAATTATGAAAACCTTTTAACAATGGGTACTTCGTCTTGGTTCCTCGGCAACGATTGAAGAACGACAGTAAAGTGCGATATTTAGTGCGATTTGCATGAATCTGTGAGTCTATCGAGTTTTGAACGCATCTTGCGCCCGTAAGGCATGTCCTTTGAGTACCGACTAACAAATGTTGACTGATG
>1467 a8i_18799
CAAATCAATAGAGGGGTATTGATAAGTGGAGGGGGAGGGTAGTTGAGGTTGGCGGGTATTAGGTTAGGGTATATATGTATGCATCTACCTATTAGGTAGGGTATATATATATGCATCTACCGAGTTTGCCGGCCAACCAACTCTGCCACCGCTGACACTATATACGATACTACCTCCATGTGTTCGGGGCAGCAATGCTTCGTGACATTTACGCTTGTTTTGTTTGTCAGAGTAGTAGTGATTACGATATGAAAGAGA
>1468 a8igrp_5249
CAGAGTTCATGCCCTCCGGGTAGATCTCCCACCCACTGCTATCACTACTCTCGTTGCTTTGGCGGGCCGCTGGGCCCTGCCCGGCCGCCGGCCCCGGCTGGCGCGTGCCCGCCAGAGACCTCACAGACTCTGAATGTTAGTGTCGTCCGAGTAACTATACAATCGTTA
>1469 a3igrp_11271
ACAAATCTTTGAGCGAAAGCTCACTAACCTTTGTGAATAGGCTTGCGCAAGCAAGTTAGATGGGTCGAGGGGGCGAAGAGTAGACTGAAGCAATTTAGCATGCTCGTAGCCACAAATATTAATATTGTCTGATTACATTTGGAAGTCGCAAGATTTCTGAGAATAATA
>147 a7ogrp_6194
ATGAAACTTCAAAGTCGGCCGATAGTTGTTGCTGGTGATTCATTTCACATGTGCACACTGTCGGTCGCAATCCACACACACCTGTGCATCTATGACTCGAGGTTGTAATGACTGAGAGTAAATTTTACACACTCTTGTATGTAATGGAATGTCTTTTGTGCTATAATGTACAATATAAA
>1470 a13ogrp_5057
AAGAGAGAGGCCTCCCGGCTTCGGCAGCTCCGGCTGCCACCTCTACACCCTGTGATTATATACCTATCTGTTGCTTTGGCGGGCCTTGGGGTCATGCCCATACCGGTCTCGGCCGGTGCGAGCCCGTCAATAGCCCCCTCAAACTCGTTTAATTAGTGATGTCTGAGTAAAACACAAATAATCA
>1471 a9igrp_4931
CTGTGGGAGTTGGCCCCCGGCCAACATCTTCACCCCCCTGCGTACCATCCGGTTGCCTCGTGGTCGAAAGCCACGAGCCATCAAACCTGATCTCTTGCTGTCTGAGGATTTGGAAAATGAATA
>1472 a2i_1425
GTGAATATCCGGGCCTCTGGCCTGAACAAAAACCCCTGTGAACTGTGGCCCTCGGGCCTTTTTACAAACATCTGTGTGAAGAACGTGTACTATTGTAACAAATCA
>1473 a7ogrp_10181
CTGATTTTGCCAAAGATAGTCGAGTCTCTATGAGATTCCTTTCTGCGGTAATAAACCACTGTGCACTATGCTGTATTTTGGGTGCTTGAGACTCTTTATGGGGATCGACACCCAGCAACATATGAACCAATGAAATTTTTTGTCTGAAATCGATTCTAAATTGAAA
>1474 a11ogrp_13182
CCAAAAATTTCATGCGTCCTGACAACCAGCGTAAAAAACTGGGCTGTCATGCCGCCGGGAGCGTCGCGGTCCCCCTTGAAATACAGGGGGACGCCAACGCGCGCATGCCTGAATCCTTATATTTTACGAGTACCTCTCCCTTCTCCTTCGGCGGGGCAACCCGCCGTCGGAACCTTACAAAAACCTTTTTGCATCTAGCATTACCTGTTCTGATACAAACAATCGTTA
>1475 a16igrp_10929
CAGAGTACCGGCGCCCCTCTGGGCGCCCACTCCAACCCTTGTGTACCCAACCTCGTTGCTTTGGCGGGCCGGCGCCCCCGCGCGCCGCCGGCCCACGCTGGACAGCGCCCGCCAGAGGAGACCACAAACACTGCTCACGGTGACATCTGAGTAAAGACAAATGAATCA
>1476 a4igrp_9920
GAATGAGATTCGGTCAGAGGGCGTAAAACCCCTCCAGCCGTCAACCTCCACCCTTGTGTATCATTCAATTGTTGCTTTGGTGGGCCGCGAACCTAACGGTGAGCACCGGCTTCGGCTGGAGAGTGCCTGCCAGAGGACCCAACTCTGTAATTTTGTAATATCTGAGTACTATATAATAGTTA
>1477 a4i_12347
CAGAGAGTATCTTACTCCCTAAACCCACTGTGAACTTACCTATGTTGCCTCGGCGGTGGTCCCGACTACTCACAGTAGCGGAACCAGACCCCGCCGGAGGACCCAAACTCTTGTCTTCCAGAGATTGTCTGAGTGGCGCAAGCAAAAATAAATCA
>1478 a14igrp_19197
ACGAGTTTTGAAGTGGGATTGATGCTGGCCTCCCGAGGCATGTGCTCGTCCTTGCTCATCCACTCACAACACCTGTGCACTGTTGAGGTTTGGCCCCCCTTCAATCGGAGCCGTTCCCCCCTCACATACGAGGGGGTCGAGCCGGGGTCAGGCCTTCTACCTCTCACAAACAACTTGTAATGTCTATTCGGAATGTAACGTTTTTANGTCAATGAAACAATA
>1479 a2k_6658
CTGCTTGCTCATGGCCGTCCTCAGGGGCAACCCCTTGGGCGGTACGGCAACAACACCCTTGTCTATGTATACCCTTTGTTATTTCCCTCGGCGGGGCCACCCGCCACTGGGGACACCAAACCCACTTGCATATAGCATCAAACCTTCTGAACAAACCTAAATTATTA
>148 a2igrp_35
CAGAGATGGCTTCGGCCTACCTCCAACCACTGTTTACCTCCCTGTTGCTTCGGCGCTCCGGCGCCGGAGACAAACTCTGAACGTTCAGTCTGAAAAACATGAAAAGTTA
>1480 a11igrp_5198
GTGATAGTGTGGGCGTTCGCCGCCCTTCCAACACTCCACAACCCTGTGCACCGTGCATTTTTTCACGCGTTACTGTCCACTGGAAGCATCAACTCAAAAATGAAAGGCA
>1481 a4i_8427
ACAAATCTCTGTGTGTTTTATACACACATTAATCTTTGTGAAATGTCAATCCAAAAGATTGAATTATTTAGAGGAACTGTGGTTCCCCTAAAAACATAAATGTCTATTTTAAATGACTGAATTTTAAAAATTTAAAATTA
>1482 a4c_13522
CAGAGTTCATGCCCTTACGGGTAGAATTCCCACCCTTGTATATCTTACCTTTGTTGCTTTGGCAGGCCGTAGGGTTCGCCCTGCTACCGGCTCCGGTTGGTAAGAGCCTGCCAGAGGACCCCAAACTCTGAATTTTAGTGTCGTCTGAGTACTATATAATAGTTA
>1483 a8j._13415
TCGGGTCTCTGACTCTAAAACCACTGTGCATCAATACTTTTACTGCTGAGGCGGGCCGCTCGCTGGGGGAGCTTGAGCCTGAAAAGGTGGCTCGCCGAAGCAACTTTTACTACCGATAAACCTGAAAAGAAAAAACTTTCAAATTATCA
>1484 a120grp_14251
CCGAGTAAGGGTGCCCTACAAGGCGCCCGACCTCCAACCCTTTGTATACTTGACCAGATGTTGCTTCGGCAGGTCCGCCTCTCTAGCTTCCGCTTAAGAGGCCGCCGGGGGTCCTTACCGGCCCCGGGTCCGTGCCTGTCGATGGCCCTTCTTAAAACTCTTGCTATAAACGTGTCGTCTGAGTTTAAACAAAAATAAAACA
>1485 a5k_28656
ACAAATCATGGTAGGGTGCTGTTATGGCGCCCTATATACACCCGTTGTCGGGAAGGGCCTCGGCCTGGATCGACTCTGGTTGCAGCCCTCGGGCTGTAGGCTGTTGTCTGCTTTGCTGCGGATGGCAGCCACATAGACGCTTGTATGTTTGACAGAGTTCAGTTGCATCTTAAAAAAT
>1486 a4j_3282
TCGAGTTACCGCTCTACAACCCTTTGTGAACATACCTAACTGTTGCTTCGGCGGGCAGGGGGTCCCCCCGGGGACGCCCTCCCGGCCCCGCCCCCTACCAGGGGACGTGGCGCCCGCCGGAGGATACCTAACTCTATTTTAACGACGTTTCTTCTGAGTGGCACAAGCAAATAATTA
>1487 a1igrp_7993
AAGTATTAGAGAAGGTTTTGATGCCAGTGGTTTTGCGACCGCAAGTGCTCGCCTTCAACAATCTTATCCATACACCTGTGAACTATTGCAAGTGAGAGGAGAAATCCTCTTGCTTGTCACACACATAAACTCGTTAATTTGATGAATATATCAAGTCGAAAGACTTATAATATCTAAAA
>1488 a4i_18881
GCAATGAGTTGGGTGGATGTGGGTAAAATCACGTCTACTCTAAAGCACAGAGACCTAGAGTTTCTGATGTTTGCGCTTGTACTGTTTGACATTAGTACCGCTTTTAAATATATA
>1489 a1igrp_4626
ACAAATCGGTGTTATTGGTGGTGTGTTTCCCTCCCTCCCTGCTAAAGGAAAGGGGGAGCATGCCCCTAACATTAGTTCTGGGAGCAATCCCGGATGATATAATATTATACATTTATCATGAGAAGTGAGAATTGTGGGATAAACAAATAC
>149 a18igrp_13688
CCGAACTGTCAACAAGAGTTGTTGCTGGTCCCTGTAATGGGGGCATGTGCACGCTCTGTTTACACATCCACTCACACCTGTGCACCCTCTGTAGTTCTATGGCCTGGGTGGGCTCTGCCCTCCTGCTGTGGTTCTACGTCTTTACACACACACTACAATAAAGTCTTATGGAATGTATGTCGCGTTTAACGCAATTAAATA
>1490 a4l_13120
CGTATGGTAGGCCGGTCTGACCGGTTCTATTCAACCCTGTTTTTTGCGCACCCTTTGTTTCCTCGGCAGGCTTGCCTGCCAGTAGGACCTTTTCAACCCTTTGTGTCAAAGCAATCAGCGTCAAACAAACAAAACAATGGTAA
>1491 a4d_27112
TCGAGATAGGGTCCCTCTGGGGCCCGACCTCCCATCCTGTGTCTACTTGACCCCTGTTGCCTCGGCGGTGTCGCCCGTCGAGGACTTTACAAACTCTTGTTCAACCATGTGTCTGAGCGTGAAATTAAATAAGCACA
>1492 a8i_22631
CCGAGTTCCGGGTGGCCTCGCGCCCCCAACTCCCACCCTTTGTGTACCCACTCAATCGTTGCTTCGGCGGGCCCGGGGGGCAACCCCCCGCCGGCCTTCGGGCTGGCCAGCGCCCGCCGGAGGACCAACCAACCCTTCTCAACGGTATCGTCCGAGTCGCTCAGCGAATAGAAACA
>1493 a2i_11646
CCGAGTTTTCAACTCCCAAACCCCTGTGAACATACCTCGACGTTGCTTCGGCGGGACCGCCCCGGCGCCCATCTGCGGCCCGGAACCAGGCGCCCGCCGGAGGACCCAAACTCTTGCTTTAACCAGTGGCATTTTCTGAGTCTCACAAACAAAAAATAAATCA
>1494 a8i_7062
ATAGATAGGGTCGTGGTGGCGAGAGCTGCCTGGCCCAATCCATTCAAACCACCGTGAACTCTCCCAGTTTCTTCCGTGGGGCAGCGTCTCCGGACGCCCGACTGCCAACGCGGTCGGAGTACCCGCGGCAAGACCATTACCCAACTCTTTGTTATGTGTACCTGTCTGAACAAAACAAGTTAATTCTTA
>1495 a17ogrp_11440
ATGAGCCTGGGTGCTTCGGCGCCCGACCTCCAACCCTTTGTTTACCTTACCACTGTTGCCTCGGCGTTAGAGGGAAACCTCTTCGCCGGCGGCCAATTGATTAAACCCTTTTTAAACCCAGTCTTCTGAGAATTTATTTAATAACTTCA
>1496 a2i_6285
CCGAGTCAAGGGTGCCGCAAACAAGGCCCCAACTCCCACCCAATGTATACTTCTAAACCGTTGCTTTGGCGGGCCAGGGACGAAACGTTCCCGTTGGCTTCGGCTGGCGAGTGCCCGCCAGGGAACCATCCAACTCTGTTTAACTGTGTCGTCTGAGTGGCAACAGCAATAAATCA
>1497 a1i_15876
TTGAAATCCTTAGGATGTTGCTGGCCTTTAGGGGCATGTGCACTCCGCCTTTTCAATTCACCTGTGCACTCATTGTAGGCCGGACTTTAGTCTGTGTCTATGTTTTTATACACCCCTTATAAAAAAGTTTAACAGAATGTCATAATAGACCTTTGATGGTCGAAATAAATTAATA
>1498 a4a_25941
ACAAATCTGCTGCGTGGCGAGCCCGCAAGGGAGCGCACACGCAAATATACCCCGAGCCGGTGTCATAGCCGGCTTTGGTTGGGTGGCTTGGGCCTCCGGGCTCGGGCTGCTCGGGCAGTGCTTCGGTGCTGGCCCCACATGGACGCTTGTGTGTGAGTTTGACAGAGTGCAGTTGTGTACACACAAAATGA
>1499 a2ogrp_582
TCGTAGGGCTTCGGCCCTGTCGAGATAGAACCCTTGCCTTTTTGAGTACCTTTCGTTTCCTCGGCAGGCTCGCCTGCCAATGGGGACCCAATAAACACTTTGCAGTACCTGTAATAGTCTGAAAAACAAACAAAAATTA
>15 a1ogrp_17458
ATAATAAGTGTTTTATGGCACTTTTTAAATCCATATCCACCTTGTGTGCAATGTCAGTCGATCTTCTTCATGGAGGTCGACCAAACATCAACCTAATCTTTTAACTCTTTGTCTAGAAAAATATTATGAATAAACAATTCAAAATA
>150 a4igrp_4122
ATATAGATGATGATGGACTTATATACTGGGGGTTTATTCAACCAGCACACACACATGATTACAAACTAACAATACACAACATACAGAAG
>1500 a6igrp_4750
CAGAGAACCTGCCCTTTGGGGTAGATCTCCCACCCTTTGTCTACCGTACCTCTGTTGCTTTGGCAGGCCCGTCCTCCGGGACCGCCGGCTCCGGCTGGCCCGTGCCTGCCAGAGGACCCCAAACTCATGTTTACGTGTCGTCTGAGTACCATACAATCGTTA
>1501 a2ogrp_7332
CCGAGTACCGGCGCCTCCGGGCGCCTGCTCCCACCCTTTGTGAACCGATCTTCGTTGCTTTGGCGGGCCGGCGGCCCCCGGCCGCCCTCCGGCTTCGGCGGGAGCGCGCCCGCCAGAGACCCATCCAACCCGTCTGAACGGTGTCTTCTGAGTCTCACAAATAAAATCA
>1502 a5b_19981
CAGAAGGTCCAGCACCTGAAAACCATTGTGAACCGTCCCATTTTACTGCCTCGGCGGGCGATCCCAGGGCGGGATCGCGGCTCCTTCGGGGGCGCCCGCCGGCGGCAGACCCTTAAACTCTGTCTCCAGCGGGCTTCTGAGTGAAATTAAAAAACAGTCA
>1503 a4k_31196
TCGATTTGTGTGTTTACACTTTTATTATTGCTTCACTGTCGCGTCGTTCAAAGCAGCAATGCAGCGGCGGCGCGATGGCGACGCTTGACACTGTCATGCGCTTGGCGTGCTCAGAGTGTCGACCGGCTGGCAGGGCCAAGTGGGGGCTTGAGCCAGCCTGCGTCGGCGTACGCGCCAGGCGATTTCTCTTCCACTGTGAGGTACCTAGATGCACTCGTCCGCCGCTGTCGTTCATCCGCAGTGGCACATGGGCGGGGCGCAAGTGCCAGACTCGTGTGCTCAGTTTCGCGAGTCGAGAGCGCAAGGTTCAAAGAGTTGGGCTCGAGCTGACTGTTGCTCATACTTCAGTCGGCTGGCGTGCGTGTTGGTAACCAGGCCTCCAAGCTTGGCGACTGCTCG…
>1504 a9igrp_23240
ACGAGTTAGGGTCTCTCTGGCCCGACCTCCCAACCCTTTGTCTACTTGACCATCGTTGCTTCGGCGAGCCCGTCCTCACGGACCGCCGGAGGGATCTTTACTGGCCCTCTGGTCCGCGCTCGTCGGTAGCCCAACCTTTAAAATCTTTAACTAAACGTGCCTTAATCTAAGTACAATTATTAAATAAAAGCA
>1505 a11ogrp_3926
CTGGGTACCGAGCGCCTCGCGCTCACCCCCACCCTATGCTTCGCCCCGAAACGCACTCGGCATCGTGGGTCCCTCATCGGGGCCCCTGCCGGAATCCAACTCTGAACAACCTTGATGCCTGAAGTAAAAAGCAAACAGTTA
>1506 a13igrp_763
GAGATTGGCCTCACGGCCGTTTTCATCCACACACACACACCGTGAACCGTTCCCCTGCCTCTCGGGGCTTGGGACCAACCAACCAAACATTGTCTAAAGAACGTAAACATCGTAAACAAAACA
>1507 a7igrp_1999
CCGAGTTATACAACTCCTAACCCGTGTGAACCGTACCAATCGTTGCTTCGGCGGCCTCGCCCAGGGAGCCCCAGGGCGCCCCTGAGCACGGCGACCGCCGGAGGACCTAAACTCTGCCTTACAGTGTCTTACTGAGTGGAATCATACAAATGAATCA
>1508 a1a_14147
ATGAATCATAAAGTCGATCATTTGTGCTGGTGTTCATTCACATGTGCACGTTGATCGCAAAATCCACACACCTGTGCACTTTTGACCTTGGGATTCGCTTGTTCTCGTGACTTGCAGTTGGTAGACTGTTGTCGACCTGAATCTCAGGGTACTTTTTTATCTATGCCAAATGTCTTAGAATGTAACTGTGCATAATGCGCAAATATA
>1509 a9c_18642
CCGAGTTTTGGAACTCTCAAACCCATGTGAACTTTACGTTGCTTCGGCGTCGCGACCGCGGCGCGCGTCGAGGACCCCAAACTCTTGTCTTTAATGAGTCTTCTGAGTGGCATTATGCAAACAAATGAATCA
>151 a4k_1648
CAGAGTTGTAAAACTCCCAAACCATCGCGAACTTACCGTACCGTTGCTTCGGCGAGGGGCTCCGGGGAGGAGCCGCGGCCCTAACGGGTGCTCGCCGCAAGCCCAACAACTCTGAATTCTTGGTATCTCTGAGTATAACATACAAATAAGTTA
>1510 a18igrp_3672
CAGAGTTGAAAAACTCCCAAACCCTTTGTGAACCTACCTTCATTGTTGCTTCGGCAGGCGGCCCCAGGGCGGGGCTGTAGCCTCTTTGAGGTGCCTGCCGGAGAAGCTAAACCCTATAACTATTGTATATTCTGAGCATACATAAAATAAGTCA
>1511 a2igrp_15326
CCGAGTTTTCAACTCCCAAACCCACTGTGAACTTATACCTTTATCGTTGCTTCGGCGGGTCTCGGCCCCGGCGCTGCCCCCTCCCCCCGGGGAGTGCGGCGAGCCGGACAACACGGCCCCCGCCGGAGGACCCAAACTCTTGAATTTTCGCGACCTGCTCGCGGCAGTTTGTATTCTGATTACTATTAAACAAAAATGAATCA
>1512 a1j_7786
CCTGAATATGGGCTTCGGCCCTCATTCTACCCTTGTGTATCTTACCTTTGTTGTTCCCTCGGCGGGTCTCCCGCCGATGGGTACCCACAAACCCTTTTGCATTTAGCATCAAAAGTCTGATAAAACATAAATAATAA
>1513 a120grp_2043
GAGATTGGCGCTTGGGCTACCCGCCCGGCGTATGCCAACATCCATATACACCTGTGAACCTGTGGCCTCCCCTTTGGGGCGAGGACTGCAAATCTTTACAACTCTGTGTAATGAACGTAATGTATTATAACAAAAACA
>1514 a1a_5866
TCGAGTTCAAAGCGTCCTGAGCTGGCTTTTGCATGTGCTCGGCGCCTCGTCCACTCAACCCATGTGCACCTGAGAGGTGCGGCGGGGTCGAAAGACCTGTTCGCCGCGCCTCGCCCCTCTACACACACCTATAAAGTCCAGTCGAATGTAACTTCGCTTCGGCGAGAAAACAAATA
>1515 a11igrp_17065
CCGAGTTCTCGGGCTTCGGCTCGAATCTCCCACCCTTTGTGAACATACCTCTGTTGCTTTGGCGGCTCTTTGCCGCGAGGAGGCCCTCGCGGGCCCCCCACGCGCGCTTTCCGCCAGAGGACCCTCAAACTCCAGTCAGTAAACGTCGACGTCTGATAAACTAAGTTAATAAACTA
>1516 a8ogrp_7402
CCGAAGTACAGGCCCTCTCGAGGGCTAAACTTCCACCCTTTGTTAATTATACTTTGTTGCTTTGGCGAGACGCCTCACGGCCACCGGCTTCGGCTGGTGAGTGCTCGCCAGAGAAAACCCAAACCCAAACTTTTTTAGTGTTGTCTGAGAACTAAGTTTAATTATTA
>1517 a120grp_12322
CAGAGTTTTCTAAACTCCCAACCCATGTGAACTTACCACTGTTGCCTCGGCGGCGCCCTTCTCCTTAGGGGGTGCGGGACCGCCGGTGGAATACCAAACTCTTTTGAATTCTTAGCACTTCTGAGTTAAAAACATAATAAGTTA
>1518 a5i_15239
CAGAGTTCTCGCCCTTCGGGGTAGACCTCCCACCCTGTGTTATTTCCAACCCGACGTTGCTTCGGCGCGGCCGCCCCCCGGGGCGCGCCCGCCGGAGACCCAACCCAAACCCTGAATCTTCGTGTCGTCCGAGTACTATACAATAGTTA
>1519 a18ogrp_9786
CAGAGTTGAAAAACTCCCAAACCATTGTGAACATACCTTAGTAGTTGCTTCGGCGGACGACCCCCCAGGGGGTCTACGGCCCCTCGCGGGGTGTCCGCCGGAGGACCAACCCAAACTCTTGAATTAGTGGCCTCTCTGAGTATTATATAATAAGTTA
>1520 a15igrp_6275
TTGAATTGTAAAAATGGGGAGTCGCTTTCGAGCACTCCTCTACATTCTTTATTCCTAAACACCTGTGAATCGTTGCTGAGTTCGCTCAGTGGCACCATTTAACACACACACTTATATCGTTTTGAACGTAAAAAACAAAAACAAAATA
>1521 a15igrp_28544
TTGAATTGTAAAAATGGGGAGTCGCTTTCGAGCACTCCTCTACATTCTTTATTCCTAAACACCTGTGAATCGTTGTTGAGTTCGCTCAGTGGCACCAATTTATACACACTTTATAGTTTTGAACGTAAAAAACAAAAACAAAATA
>1522 a18igrp_21808
GAGATAACATGCCCTTTTGGGTACATCTCCCACCCTTTGTTTACCACACCTTTGTTGCTTTGGCGGACTCGCGGCCCTTGTCGTGGCCCGCCAGAGGATCTAAACCCCAAGTTAAATGTGGTCTGAGAAAAACATAATAGTTA
>1523 a19ogrp_4201
ATGAGTCTGAAAGGGGTTGTTGCTGATCTCTTCAGGGATATGTGCACGCTCCGCTCACTCCATATACACCTGTGAACCTTTGGTAGACTGCTCAATTAGACCACTGGGCGTTGAGCAAACTGCCTATTTTTACAAACTCCAAATGTATAGAATGTACAAGCTATAAACGCATAAATA
>1524 a8i_2734
ATTACGAAAGCTTCGGTCCCCTCGGGGGCTGTCGCATCCACCCTTTGTCTACGTGTACCTTTGTTGTTTCCTCGGTGGGCTTGCCCGCCGCTAGGAACCCCTTAAACCCTTGTATTTACAGTATTCAATCCCTGATAACCTTTTAAATTATTA
>1525 a14ogrp_6974
CAGAGCTCATGCCCTAACGGGTAGAACTCCCACCCTGTGTTATCACAACTCTGTTGCTTTGGCGGGCCGCCCTTGACTGGGCCACCGGCCCCGGCTGGCGAGCGCCCGCCAGAGGACCCCAAACTCTGAATATATATGTCGTCTGAGTACTATACAATAGTTA
>1526 a2b_21815
TAGATTGGCCGAAAGGCCGTGTCTTCATCCACACACACCGTGAACCGTTTTGGAGCCCTCAGGGGTTCCGGACAACACCAAAAACAATATGTAAAGAATGTAAAACATCGTAACAAAACA
>1527 a5k_812
AAATGAGTCCCAAGACTTAAAAACCTACCGTGCTCCCCTACGTGGACATCAGGAAAGCCCTCCGGGGCATAGGAAATCTGAGAAGTTGAAGAACTGCGCTCCGGCGCATGACTAAGCAAAAAATTA
>1528 a7igrp_5584
CAAGAGAAAAGCGTCAGCTTTATTTTTACTTTTTAACTGATGGTTGGGCAAGCCCAACCGGAGGTTAAAGAAGCAACAATGATACAACGCTCACCATTGACAAAATTGGTTAACAGTAG
>1529 a3igrp_3189
ATGAGAACACTGCCCTCTGGGTAGATCTCCCATCCTTTGTTTATTTGCCTCGTTGCTTTGGCAGGCCCGCCCCCGGGCCGCCGGCCATGGTGCCGGCCCGTGCCTGCCAGAGGATACGCAAACTCTTTTTAACTAATGTCGTCTGAGTTATTATAAAATACGTTA
>153 a8ogrp_3032
GAGATTCGTGGCGAAAGCCACATACACACACACACCGTGAACCGTGGGCCTCGGCCCCATTACAAACTATGTTGTATTAGAACGTGATCATATGTAACAATGAAA
>1530 a15ogrp_5438
CAGAGTTACACAACTCACCAAACCATTGTGAACCGACCCTTCTGTTGCTTCGGCGGGAGGCGCCTCGGCGCCCCTCGGCCGATCCCCCGCCCCCGCGGCGTGGGGGGAGGCTCCCGCCGGAGGAATACCCCAAACCCTTTTGCAGCACATGGCCTCTCTGAGTTTATGTACTGAATAAGTCA
>1531 a4a_3280
CCAATTTTAGCGAGCCTGGATTATGTCCATGGTTTCGTGAAATTTTGTATTTAAAACCCCACTCTTTATATAATTTAAACAATGTATTATGATAAAAAATTAAGA
>1532 a4j_11266
CTGCTTGCTTATGACTTCTGTGTGGGAGACTGCACAGTTGTCGGGCTCGCTACCCTTGTCTAAACATAACCTTTCGTTATTTCCCTCGGCAGGGTTACCTGCTGCTGGGCTTTATCAAACCTCTTGTTTAAGTATTACACTCTGAACTACACAATAATCA
>1533 a11igrp_6194
CCGAGTTATACAACTCCCAAACCCATGTGAACTTACCTGTCGTTGCTTCGGCGGACCGCCCCGGGGCCCATCGGCCCCGGACCCACGGCGCCCGCCGGGGGCTCGAAAGACTCTTGTTTTTTCTACGCAGACTTCTGAGTGGCATTTATTACAAATAAATCA
>1534 a9l_24653
AAAAATTCCAACTAAAAGTATAGCAGCCTTAGTGCTGCTTACTTTTAAACCCTTGTGAACTGTTTATTGTCTATGGTGGGTTAAAAGATCTCTCTTTGTAAGGGATTGGCTTTAACCAGCTACCCAACCTATTATTTAAAACACTTATAAATTTTGTCTTTAATAATTCATTTTTGAATTCTTTGAATTTAAAAA
>1535 a4d_934
TCGGGAGTGCCTTCGTGGCTTAACCTGCAACCCAATGTTTACCTAACCCTTGTTTCTTTGGCGGGTTCGCCCGTCAGAAGAATTCTCAAACTCATTATAAACGTGGCCTCTGAATAACCATAAAATAACATTA
>1536 a1igrp_857
CCGAGTTTTTGGGCTTAACACCCCTAACTCCCACCCTGTTTACCTTCTCAGTTGCTTTGGCGGTAGCAGACTTACCTCTGCTGGACGCCGCCAAAGACTTAACCAAAACTCTTAAACATGTCGTCTAAAACAAAATTAAATAAGTCA
>1537 a1ogrp_1974
CTGAGAAAAGAGGCCTCCGGGTCTCCCTCACTAATACCCCGCCTTCCAACAAAGTCCCTCCGGGGACGCACTTCATGTTGGAGGGTCTGAAAATGACCCTCCGCCCCCTATAAAATTCTGATTGTTTGTGCAGTCTGAGTATATATTCTAATATATGA
>1538 a1l._8728
CCGAGTTAGGGTGCCCTCAGCGCCCGACCTCCAACCCTTTGTCTACCTGACCTTTTGTTGCTTCGGCAGACCCGCTGGGCTTTCCTTCACCGGGAGGGCCGGCCGCCGGGGGCCTTTACCGGCTCCGGGCCCGCGTCTGTCGACGGCCATTATTCAAACTCTTGTTAAAAACCATGTCGTCTGAGTAAACAAACAAATTAAAACA
>1539 a1j_12341
CTAGAGCAAAGGATAGACAGCACCCCATAGAAGCTTGCTTCGTGGCGGGCTACCCTACTCCGGTAGGGTTTAGAGTCGTCGAACCTCTCGGAGAAGTTCGGTCCTGAACTCCACCCTTGAATAAATTACCTTTGTTGCTTTGGCAGGCCGCCTCGTGCCAGCGGCTTCGGCTGTTGAGTGCCTGCCAGAGGACCACAACTCTTGTTTTTAATGATGTCTGAGTACTATATAATAGTTA
>154 a20ogrp_30022
TTAATCGCAGCTTAGCTGCTTTCAATTGATTACACCTGTGAACTATGCCTTCGGGCCAACAAACATAATGTAACGAATGTAACATATTATAACAAATA
>1540 a1l._9355
ATGAATTTTTAGGGCGCTCTTTTTAGAGGTCCGACCAATTTCATTTCCACACACTGTGAACACACTTCATTTTTACACACAATTTATAAACACACAAGTCTATAAGAATGTTTAAAGTCTCTTAATTGAGCATAAAGTTATAATA
>1541 a6ogrp_11821
ACGAGTTAGGGCCTCCGTGCCCGACCTCCAACCCTCTTGTATCACAACACCTCGTTGCCTCGGGGGTGGCCCTGCCTCACGGCGGGCCCCCCGGAGGACCACTCAAACACTGCATTTTAATGTCGTCTGAGTTAGATTTTAAATGAAATCA
>1542 a16ogrp_24718
GTGATTTGGTCGAGAGACCTTTATCCAATCCTCACACCTGTGAACTTGTCGGTGGGCTCAGGCCCGCCGGTCTTCATATACTATGTGTCATGAACGTGATGTATATCAAAAACAAAAACA
>1543 a15igrp_32898
TTGAATAATAGGGCTTCCCATTCTTTGGGGCCCGAACCTCACATAATTTCCACACACTTGTGAATCGTTGGAGCACGGAAGGAGAGACTCTCGAGTCTCTGTGAAAATGCTCTGGCACCCATTTATTATTACAAACTCTGAGTTAATGGATGTAGTTGTAAACTTGTCTTTTGACAGAAACAAAAATA
>1544 a5a_16532
TTGTATACCTGGTCAAGCGTAAGCTAGGCCAAACCATGTGTGAATCAGTGTTCTCTTCCCAGCGGAAGGTCTTGCAACCCTGGGCTCTGCCTGGGCAAGCTTGATTGACGGCTGGGGTATTGCCTCGCAAGAGGTGAATCATGTTCAATAGCAGGGAACTCAAAAGTAACAAATTA
>1545 a9f_20147
GTGAAAACAAATGCTTAGGTGTCTCTGCTTCGGCAAGCCCTTTGCACCCTTCACATCCATAACACCTGTGCACTGTAAGATGACTTCTCTTCGGAGTTGTTGTCTGACCTTTTTATCACAAACAAATTATATGTAACAAATGTAAACTTTATTATAACCTAATA
>1546 a4l_12461
CACAATATTACGGGGGCCGGACCCTCAAGCGCTGCTCTGCAAGCTTGAGACCTGCCCTGTCAGATATTATCCCCATGTCTTTTGCGCACTTTGTGTTTCCTTGGTGGGCTTGCCTGCCGATAGGACAACTTTTAAACCTTTTGTAATTGCAATCAGCGTCTGAAAAAACTATAATAGTTA
>1547 a4ogrp_6642
ATAAAGTGGGGGAGAAATCCCTCTTTGGCCGGGATGTTTCGTCCTGGCTAAAAACACCGCGAACTGTAATTGTTTTTTGGGTTGGTTGGGCTGCAGGCTGGCTTGGCCGGGTTGCAGCTTGGAAGACCCAGACTATTTACCCCTATGCATTTGCCTGAATCTAAAAGAGTAAATTAATA
>1548 a8j._25273
GTGTGAGCGCGCAAGCGCAACAGAGCACGGCGCGCGTGAGCGCGCTGTGTGGGCCAGTGTCAAGTGAGCGTGTTGCCAAGCGTGGCGGGAGCAATGCCTGTGTCGCCACAGCGCATGCCCGCCCGCAGTATCATCACCCAACCAACCGAGTTCTGAATCCACACACAACAGCAATA
>1549 a15igrp_17777
GTGAATTTAGGGTGACTATTCGTAGTGCCCGACCTCCACTTCTAACACTGTGCACTTATTGGCGAGAGAATTGAAATAGTAAGGGTGGCGTTCTGCGCCTCACGAACTTCAAATCTCTTGCGGCTTTATTTTATAACTCCAAGTTAAAGAATGTAACCAAATATAAAACAAAGAA
>155 a1ogrp_12799
CAGGACTCGCAAGGCTCCCGTAACCACTGTGAACTTACCTATATTCGTTGCCTCGGCGGGTGCCCTAGACTCATATCTAGGGCATTCAACCCGCCGGTGGCCTATAACTCTGTCTCGCGCGTTGGCATCTCCGAGTCATTTTAAACGAGTCA
>1550 a7ogrp_5973
CCGAGTGCGGGTTCCAACGAGCCCAACCTCCCACCCGTGTTTACCATGACCGCGTTGCCTCGGCGGGCCCACTGGGGCCTGGCCCCGGTCGCCGGGGGGCTCCTGCCCCCGGGTCCGCGCCCGCCGAAGCGCCCTGGAACCCTGTCTGAATAGTGAGTCTGAGTGAATGATTAAATCATTA
>1551 a8igrp_12086
GTGAATTTTAGGGCGTCTACTTGTAGAGCCTGACCTCCACTCTCTAACACTGTGCACTTGATGGCAATTTGAAAGCTTCTCACGAGGCGGACATTTTGCGGCTTCATTTTAAACATTAGTTAAAGTATGTAACGAAATATCGAAACAAAAA
>1552 a4d_15278
CAGGACTCGCAAGACTCCTTCACCCTGTGAACTCACTACAAGCACGTTGCTTCGGCGGGTGCCCCCGGCTCGCCGGGGCGCGAAGCCCGCCGGCAGCCTACTATACTCTGTCTCTTTGCGTTGGCATCTCGAGAAAAAACAACAAGTTA
>1553 a19ogrp_3325
TTGAGATCAACACCAAAATTTGTGAACTTGGGGATTTTCCCCTATGTTGGGTATCGTCCAACAAAAAACTTGTTGTTTAAACTGAATTTTATAAATTGAAAA
>1554 a1ogrp_10669
CCGAGTTCAGGGTGCCTTTCGGGCGCCCGACCTCCCAACCCCATGTCTACGAACGATGTTGCCTCGGCGGGCCGCGGTCCCCCTCTCCCCAACCGGTCAGGGATCACGCCTCTGGCCTTCGGGCCCTTGAGAGCCCGTCGATGGACCACCAAACTCTAATAAACAAGTCGTCTGAGAACAAATAAAAATACTTCA
>1555 a4d_11376
CCGAGTTATCAACTCCCAAACCCCTGTGAACATACCCAACGTTGCTTCGGCGGGACCGCCCCGGCGCCCTCGGCGTCCCGGAACCAGGCGCCCGCCGGAGGACCCAAACTCTTGTTTAAACCATAGTGGCATATTCTGAGTCTCACAAGAAAAATGAATCA
>1556 a8igrp_9939
ACAAATCCAATACTTGTGGGGGACTACCAAGTCTTTCTGCAGATATTAATCCGCCGGCTCTAGCAGCTGGCTGTGATATAAATGCGTGTAATGTTGACAGTGTGTGTGATTAATTATAATTTATTGA
>1557 a9c_19477
ATGAAATGCAAGGACGCTCTTTTTAGAGGTCCGACCCATTCATCCTTTCACCCTGTGCACAAATTATTTTTACATCCATTTTAAACACATAAAGTTATTGAATGTCTATAGTCTCTTGATTGAGCATAAACAAAATA
>1558 a18igrp_11642
TCGAGTTTAGGGTATTTCATACCCGAATCTCCAACCCATTGTCTACCTATATTTGTTGCCTCGGCGGGCCGACCGGGCCCCGTCTTCGGACGGGAAACGGCCGTCGGCTCTAGGGCTTTCGAGCGCCCGCCGCAGGGACCCCTTTAAACTCTTTTTGAAACGAGCAGTCTGAGTGAATTATAAATACTTCA
>1559 a4d_3765
CAGAGAGGAGCTCCGCGCTCCAGGGGGTTCGCCCCCGCCTCTCAACCCTGTGAAAATATACCTTTGTTGCTTTGGCGAGCCTTGGGGTCATGCTCATGCCGGGCTCTTGCCTGGCGAGCGCCCGCCGAAAGCCCACCAAAACTCGTTTAATTTATGCAGTCAGAGTCTAAAAACAATAAAGCA
>156 a11ogrp_22137
ATAATAAGTGTTTTATGGCGACTTTTTAAATCCATATCCGACCTTGTGTGCAATGTCAGTCGATCTTCTTCATGGAGATCGACCAAACATCAACCTTTATTTTTTAACTCTTTGGTCTGAAAAATATTATGAATAAACAATTCAAAATA
>157 a8ogrp_280
TCAAATACTTTAAGAAGGTCTAAACAACCTCTTACTGTACACCCTTTGTCTTTGCGTACTGTATGTTTCCTCGGTGGGTTCGCCCGCCGATAGGACATTTCAAACTCTTTGTAGTTGCAATCAGCGTCAGAAAAAACTATAATAGTTA
>158 a5b_3826
CAAGTTCTGTAGGTTCTGTCGCTAAGACATGACTCTATATACGCGTGTTGTGTTTGACAGAGTTATATGAGAGACAATTATAGA
>159 a6ogrp_1708
CAGAGTTCATGCCCTCACGGGTAGACCTCCCACCCTTGTGTATCTATACCATGTTGCTTTGGCAGGCTGCTGGCCCCCTCGGGGGACAGCCTCGGCGCCCTCGGGCCTGAGAGTCGCCTGCCGGAGGAAAAACAAACTCTGAATGTTAGTGTCGTCTGAGTACTATATTTTAATAGTTA
>16 a17igrp_8940
TCGTATAAACTTGAACAGGCTGTTGCTGGCCCTCCGGGGTGTGTGCACGCTTGTCTCATCTTTGTCATTTCTCCAACTTGTGCACATTTTGTAGATCCTGGATGGGGGTGAGCCCTTGTGAACTCGCGTTCGAATTGGGACTGCTGTTGCTTTTCTTTGGAAAGGCCGGCTTTTCCTTGCATCTTTTTTCCAGGTCTATGTCATTTTTTCACAACCTCTTGAATGTGTTGGAATAGTAAAAGTGAAAATATATA
>160 a5igrp_8334
GAGATGTGCGCAAGCACTTTTCCCTTCATACACCTGTGCACCGTGGTCTTCGGACCTTTACAAACATTGTAGTCATGAACGTCTTTTATTATAACAAAATA
>161 a5i_7396
CTGAGTTTACAACTCCCAACCCATGTGAACATACCTTTTGTTGCTTCGGCGGGATGCCCCCGGCGCCTAGTGTGCCCGGGAATCAGGCCCCCGCCGGAGGACCCAAACTCTTGTTTTTCTATAGAACTTCTGAGTGGATTATTTTAATAATTA
>162 a14igrp_3769
AAGAGAAAGGACGAAAGTCCAACCTCCAACCCTTTGTTGTAAACCACCAGTTGCCTCGCCTTATGTTGGCTGATTGAGGCGTGGGGAGACCCGCGTTGCCCTCAGCCTGCCTCTATGGCGATGGACCTTTAAACTCGAATATCAGTGTAGTCTGAGCAAAAATTCAATGAATTA
>163 a20ogrp_26936
ACAATAAGCGTTTTATGGCGCTTTTTAAACAATCCATATCCACCTTGTGTGCAACGTTTGAGTTTTGCTTCTCTTTCCTTTTACTGCGAGAGAGGAGTACTGCTTAAATACATCAACCTTTTTAAACTAGTTTGTCTGAACATGTATCATGAATTTTACCTAATTCGAAAATA
>164 a4a_7710
GAGATGTGCGCAAGCACTTTTCCCTTCTTACACCTGTGCACCGTTTGGTCTTCGGACCTTTACACAATACATGTAGTCATGAACGTAAATTATTATAATCTAATA
>165 a9c_219
CAAATCTCTGTCTTGCTTGGGAGGCCTTTGGGCTGACTGGCAGACACATATGCACAGGGCCGCAAGGCTCTGATGTTTACGCTTGTTTGTTTGACAGATTTATTATGTGACAAAACTTGA
>166 a11ogrp_12165
ATGAATGCAATCAGAGTCGGTTGTCGCTGGCCTCTTCATCGAGGCATGTGCACGCCTTCTCTGTTCATCCACACACACCTGTGCACTTGTGAGACGGATTTGACCCTCTCGGGGGACGGTCCGTCTATTATACATAAAACTCCAGTAAATAAAATTTGAATGTCATTTGATGTAACGCATCTTTAAAC
>167 a2igrp_4197
CAGAGTTCATGCCCTTCGGGGTAGACCTCCCACCCTTGTGTATTTATACCTTTGTTGCTTTGGCAGGCCGCTAGGCTCGTCCTGGCTACCGGCTTTGGCTGGTGTGTGCCTGCCAGAGGACCCCAAACTCTGGATGTTAGTGTCGTCTGAGTACTATATAATAGTTA
>168 a15igrp_2013
GAGTATGGCCGAAAGGCTTTATCCACACACACTGTGAACCGTGGCTTCGGCCCTTTATATACTATGTGTATGAATGTATTTTATCATAATAAAAA
>169 a13igrp_5055
CCGAGTTTACAACTCCCAAACCCCTGTGAACTTTACCTATCGTTGCCTCGGCGGACCGCCCCGGCGCCCTCGGGCCCGGACCAAGGCGCCCGCCGGAGGACCCAAACTCTTGTTTTCTATAGAATCTTCTGAGTGGCATAAGCAAAAATAAATCA
>17 a8i_3566
CCTAGAGTTGTAGGCTTTGCCTACCATCTCTTACCCATGTCTTTTGAGTACCTTCGTTTCCTCGGCGGGTCCGCCCGCCGATTGGACAAACTTAAACCCTTTGTAATTGAAATCAGCGTCTGAAAAAACATAATAGTTA
>170 a1igrp_292
TCGTGGGGCTTCGGCCCCGTCGAGATAACACCCTTGCCTTTATAAGTACCGCCCGTTTCCTCGGCAGGCTCGCCTGCCAATGGGGACACATTTAACACTCTGAAATACCTGTAACAGTCTGATAAAACAAACAAAAGTTA
>171 a14igrp_16399
ACGAATTTGAAGTCGATCATCTGTGCTGGCGCAACCACGCATGTGCACGTTGATCGGCAACTCATCCACACACCTTGTGCACACCTAGACCACAGAGCGGTTCGTCAGGATCTTCGGGTCTTGGCTTGAGCAACTCTGTCGGTACTTTTTTCACACACTCGTATGTGATTGGGATGTCTCAGTGCTCTTAAGCACAATAAAGTTTAAAA
>172 a14ogrp_2145
CAGAGTTGCAAAACTCCCAACCATTGTGAACCTACCTCACCGTTGCTTCGGCGGGTGGCCCGCTAACCACGGGCTGCGCTGGCTGCCTCTCCAGGGCATCCGGCACCCCGTCAGAAGCCCGAAACTCTTTGTCATCAGTGGCCTCTCTGAGTAACTTATACAATAAGTCA
>173 a18ogrp_3734
ATGAAACTTCAAAGTCGGCTCGTTCTGTGCTGGTGGGGATTACTCACATGTGCACGTCGAGTCGCAAATCCACACACCTGTGCATCTTTGACTCGAGGTTAGTAAAATGACCAAGAGTACTTTTACACACTCTGAATGTAATGGAAATGTCTATGTGCAATAATGTACAAATAAA
>174 a19igrp_3492
TTGAAATAAACCTGATGGGTTGTTGCTGGTTCTCTAGGGAGCATGTGCACACCTTGTCATCTTTATATCTCCACCTGTGCACCTTTTGTAGACCTTTCAGGTCTATGTTGCTTCATTTACCCCAATGTATGTTAATAGAATGTTGTGCCTACATGATATATA
>175 a7ogrp_7691
CCGAGTTATCAACTCCCAAACCCCTGTGAACATACCTGAACGTTGCTTCGGCGGGACCGCCCCGGCGCCCTCACCCGGCCCGGAACCAGGCGCCCGCCGGAGGACCCAAACTCTTGTTTAATTTAGTGGCATATTCTGAGTCTCACAAACAAAAAATGAATCA
>176 a20ogrp_3474
CCGAGTTATTCAACTCCCAAACCCCCTGTGAACCTTACCACACACGTTGCCTCGGCGGGACCGCCCCGGCGCCCTCGCGGCCCGGACCAAGGCGCCCGCCGGAGGACCACCAGACTCTCCTGTCGCAGTGGCATTTCTCTCCGAGTCAAACAAGCAAAATGAATCA
>177 a19ogrp_2921
GAGAATGGCCGAAAGGCTTTATCCACACACACTGTGAACCGTGGCTTCGGCCCTTTACAAACTAATTGTATGAATGTAAAATATCATAACTAAAA
>178 a15ogrp_1369
CAGAGTTGCAAAACTCCCAACCCTTTGTGAACGAACCTACCAGTTGCCTCGGCGGCGAGCCTTTCAGGCGGACCGCCGGAGGAATATAAACTCTTTGCATTTTAGCATCTCTGATTACTTATTCAATAAGTTA
>179 a8b_26800
GTGAATTTTAGGGTGCTTCGCTTTTAACAAGCGAAGGCCTGACCTCCACTCTCTAACACTTGTGCACCAAAACATATGGCCACTAGGATTTTGAAAGGTTCTCGCAAGAGTTCTGATTAAGAAAACTAGTAGCTGTTCACTTTTAAATACACCAAGTCAAAGAATGTAAACAAACCAAAACAAAATA
>18 a18igrp_621
CAGAGTTCATGCCCTTTGGGGTAGACCTCCCACCCTTGTGTATTTATACCTTTGTTGCTTTGGCAGGCCGTCGGGCTCGTCCCGGCTACCGGCTTCGGCTGGTGCGTGCCTGCCAGAGGACCCCAAACTCTGAATGTTAGTGTCGTCTGAGTACTATATAATAGTTA
>180 a7igrp_5393
ACTAGTATTGAAGTCCACGGGGATCAGGCTTTCCGAAAGGAGGGTGGGGGGATGTTTGGTTCCCCCTGCTTGGGCAGACTGGAGAGCATGGTGTAACCACATTTTGTGGCGTAATTATGTTTGGCCTCTGCTGATCGAGCTTGTCACCTGAATTCTACTACCCTTGCTTTTTGCGCACCCATTGTTTCCTCGGCAGGCTTGCCTGCCAGTAGGACCCTTTAAAACCCTTTGTAATTGCAATCAGCGTCAGAAACAACGTAATCGTTA
>181 a8ogrp_10132
TCGAGTTTACAACTCCCAAACCCCTGTGAACCATACCATCGTTGCTTCGGCGGGATCGTCCCGGCGCCTCTGGCCCGGACCCAGGCGCCCGCCGGAGACCCAAACTCTTGACTTTTAGAGATTTATTCTGAGTAACACAAGTAAATAAATTA
>182 a1ogrp_1548
CAGAGTTATGCCCGCCTGGGTAGATCTCCCACCCTTGCCTATCGTACCTTTGTTGCTTCGGCGGGCCATCCCTCGAGGTCGCCGGCTTCACCGCTGGTGTGCGCCCGCCAGAAGACCTTCCAACCATGAAACAGTGTCGTCTGAGCATAACATGAATTGTTA
>183 a7ogrp_19745
ACTAGTATTGAAGTCCACGGGGTCAAGCTTTCCGAAAGGAGGGTGGGGGGATGTTTGGTTCCCCCTGCTTGGGCAGACTGGAGAGCATGGCGCAACCGGCACACCCAGTGTGTTGGCCAAGTCATGTTTGACCTCTGCTGATCGAGCTTGTCACCTGAATTCTACTACCCTTGCTTTTTGCGCACCTATTGTTTCCTCGGCAGGCTTGCCTGCCAGTAGGACCCTTTAAAACCCTTTGTAATTGCAATCAGCGTCAGAAACAACGTAATCGTTA
>184 a9l_18385
ATAAATCTAGAAGGTCTTAAAGACCTTTCTAACATCTTGTGAATTGTTTGTGTCTCTGGTGTGTGATTGTATAGGCTCTTGAGCAGATACCACGCACACCGGGTTAAACCTTGTATAAATTATAGTCTAAAAAATCTAAAAAAGTAATTAAAA
>185 a2igrp_2394
GTGAGCCGAGAGGCGTTAAATCCAAACCTCTGTGAACCGTATCCAATAACCAGTGTGACGAACGTGAGACTATACAAAACA
>186 a2b_15488
TAGATTGGCCGAAAGGCCGTGTCTTCATCCACACACACCGTGAACCATTTCCGAGGGTCGTTGAGGGTCTCCGTCTTGACTGATGGGGGCCCGGCCCGGAGGAACCACACAAACAAAATGTAAAGAATGTAAATCATCGTAACAAAACA
>187 a14igrp_8230
TCAAAACAGCGGTACTTCGGTCCTTGCTTAAGCCACCCTTGTCCTTTCGTCGTACCGTATGTTTACCTCGGTCGGGTCGTTAGCCTTGTCCCGGTTGACAAATATCAAACCTTTATGTA
>188 a1ogrp_6999
CCGAATTGTCAACACGAGTTGTTGCTGGTCCTCAAATGGGGACATGTGCACGCTCTGTTTGCACATCCACTCACACCTGTGCACCCTCTGTAGTTCTGCAGCCTGGGGGGCTCTGTCCCCCTGCCGTGGTTCTATGTATTTACACACACACACACACGTTGTAATAAAGTCTCATGGAATGTATACCGCGCTTAACGCAATACAATA
>189 a17ogrp_9034
CTGAACCGTCGACATGAGTTGTTGCTGGTCCTTGAAAGGGGACACGTGCACGCTCTGTTTACACATCCACTCACACCTGTGCACCCTTGTAGTTCTATGGCCTGGGGGCTCTGTTCCTCTTGCTGTGGTGCTACGTCTTTACACACACACCGTAATAAAGTATCATGGAATGTATGTCGCGTCTAACGCAATACAATA
>19 a19igrp_2034
CAGAGTTGTCGACACGAGTTGTTGCTGGTCCTCAAACGGGGGCATGTGCACGCTCTGTTCACACATCCACTCACACCTGTGCACCCTTTGTAGTTCTATGGTCTGGGGGACACGCTGTCTTCCTGCCGTGGTTCTATGTTTTTACACATACGCCGTAGCGAAGTCTTATGGAATGCACTCTGCGTTTAACGCAATATAATA
>190 a20ogrp_30256
GTGAATTAAACATGCTTGGTGTCTTCGCTTCGGCAAGGCCCTTGCTTAAATCACATCCTAACACCTGTGAACTGTAAGACGTATGATGAGGTCTTTGGCCAAGTCATCGTCTGCCCTTTTTTAACAAACAATTAATGTAACAAACGTAGTCTTATTATAACCTAATA
>191 a4d_9677
CCAGATGAGGGCTTCGGCCCCCGTCCCAACCCTTTGTTGACCAAAACCTTTTTGCCTCGGGGGCAGAGCGTCCGCCGCCGCCCCCGGAGGACCACCGAACGCTGCCTCTTTACGTCGGAGTCTCAATGAAAATAAATCA
>192 a2igrp_3039
GTGATTTGGCCGAGAGGCCTTATAACATCATCCTCACACCTGTGAACACGTTTGGGCCGGGTAAGTCCGGTCCGAAACCTTTACAAACATATGTGTCAAGAACGTAATATATCATAACAAAAATA
>193 a2igrp_4104
CCGAGTGAGGGCCCTCTGGGTCCAACCTCCCACCCGTGTTTATTATACCTTGTTGCTTCGGCGGGCCCGCCGTATGGCCGCCGGGGGGCTTCTGCCCCCGGGCCCGCGCCCGCCGAAGACATCTCGAACTCTGTCTGAAGATTGTAGTCTGAGTAAAAATATAAATTATTTA
>194 a2igrp_850
ATAAATGGCGCTCTGCGTCTTTATCAATCCCTAACACCTGTGCATTTGGACGCTTCGGCGTCTTTATACAAACTATATCAGTAACGAATGTAAAGTATTATAACAAATA
>195 a1l._9252
GAGATGCGGCGCAAGCCGTTCAACCAAACACACTGTGAACCGTGGCCTCGGCCTCTCAAACTCTGTAGTATAGAACGTAATCATGATAATCATCA
>196 a5d_614
TCGTAGGGCTCCCGCCCTGTCGAGATAGCGTCCTTGCCTATTTTTTGGAGCACCGTTCGTTTCCTCAGCAGGCTTGCCTGCTACTGGGGACCCCATAAACTCTTTGTAAATACAGCAATCGTCTGAAAAACAAACAAAAATCA
>197 a4ogrp_15548
CTAGAGCAAAGGATAGACAGCGCCCGCGGAGCTCGCTCCCGGGGCTACCCTACTCCCGTAGGGTTTAGAGTCGTCGGGCCTCTCGGAGAAGCTCGGTCCTGAACTCCACCCTTGAATAAACTACCTTTGTTGCTTTGGCGGGCCGCCTCGTGCCAGCGGCTTCGGCTGTTGAGTGCCCGCCAGAGGACCCCAACTCTTGTTTTTAGTGATGTCTGAGTACTATATAATAGTTA
>198 a8i_3720
CCGAGTTTACAACTCCCAAACCCCTATGTGAACGTTACCAAAATGTTGCCTCGGCGGGGAATTTATTCATGCCCCGGGCGCGTCGCAGCCCCGGACCAAGGCGCCCGCCGGAGGACCAACCAAAACTCTTTTGTATGTCCCCTCGCGGACTTTTATAATTCTGAACCATCTCGGCGCCCCTAGCGGGCGTTTCGAAAATGAATCA
>199 a5i_5326
ATGATTGACCGAAAGGTCCTAAATCTTAACATCCCTCACCTCTGTGAACCGTTTGACCCCCGGGTCTAACAAAACTATACAAACATCAGTGTAACGAACGTCTTGTTATCTTAACAAAACA
>2 a8i_84
GAAAATCTGGCTGCAAAGCCTCTATTTTGTGCACCGAATGCCTTATGTGTGGAAGCGACGCGAGGACACTTATGAACAATA
>20 a5i_5479
CCGAGTTTACAACTCCCAAACCCCCTGTGAACTTATACCATTTACTGTTGCTTCGGCGGGTCACGGCCCCGGGGAAGGACAGCGGTCGCCGTCAGGCCTCAGCTGCCCGCCCCCGGAAACAGGCGCCCGCCGGGGAACTCAAACTCTTCTGTATTTCTTTATCTAATATATACTGTCTGAGTAAAAACTAAATGAATCA
>200 a3ogrp_1214
TTAATCGCAGCCTAGCTGCTTTCAATTGATTACACCTGTGAACTATGCCTTCGGGCCAACAAACATAATGTAACGAATGTAACATATTATAACAAATA
>201 a9igrp_19270
AAGAATTGCCCCGTCTTCTCGAAGATGGGTTCTATTCCAAACCGTGTTTACATACCTTTGTTGCTTTGGCGGGCCGCCGTTTCGGCGTTGGCTCCGGCTGACTGCGCCCGCCAGAGGACCACAACTCTTTTGTTTAGTAATGTCTGAGTACTATATAATAGTTA
>203 a4j_1390
CAAGAGTATTTCAGTTTGGCTATATGCCTCTGAAAATCTCCACCCTTTGTTTACATTACCTTTGTTGTTGCCTCGGTGGGTGCCTATGCACCTGCCGGCAGACACCTTTAAAACCCTTGATTAATACTATAGTCAGAGCTGTAACAAGCAAAAGATTAATAAATCA
>204 a18igrp_27519
ACGAGTTAGGGTCTCTTTGGCCCGACCTCCCAACCCTTTGTCTACTTGACCATCGTTGCTTCGGCGAGCCCGTCCTCACGGACCGCCGGAGGGACCTTTACAGGCCCTCTGGCCCGCGCTCGTCGGTGGCCCAACCTTTAAAATCTTAACTAAACGTGCCTTAATCTAAGTACAATTATTAAATTAAAGCA
>205 a4d_5261
ATGAGAACATGCCCTAACGGGTAGATCTCCCACCCTATGTTATTATCACCTTTGTTGCTTTGGCGGGCCGTCAGGCCTCGGTCAGGCTACCGGCTCTTGCTGGTAAGTGCCCGCCAGAGGACCCTAAACTCTGAATATTAGTGCCGTCTGAGTACTATATAATAGTTA
>206 a2k_6231
CAGAGTTGCAAAACTCCCAAAACCATCGCGAACTTACCGTACCGTTGCTTCGGCGAGGGGCTCCGGGGAGGAGCCGCGGCCCTAACGGGTGCTCGCCGATAGCCCAACAACTCTGAATTCTTGGTATCTCTGAGTACAACATACAAATAAGTTA
>207 a4j_6036
CCGAAGTACAGGCCCCTTCGGGGGCTAAACTTCCACCCTTTGTTTATCACACTTTGTTGCTTTGGCGAGACGCCCCTGGGCCACCGGCTTCGGCTGGTGAGTGCTCGCCGGAGAAAACCCAAACCCAAACCTTTTTTAGTGTTGTCTGAGAACTATTTTAATAATTA
>208 a8i_21074
GTGAATTTTAGGGCACCTTTATCTCAACGATTAGGGCCTGACCTCCACTCTCTAACACTTGTGCACCAATGAATGTGGCATCTGAAAGAGTCTCACGACTTGACTACGTTGCCGCATTTACACATTTACATATACTCCAAGTCAAAGAATGTAACAAAAACCATAACAAAATA
>209 a9c_13279
CAGAGTTGCAAAACTCCCAACCCTTTGTGAACATACCTAAGTTGCTTCGGCAGGCAGGCCCAGGGCGGGCCTGCAGCCTGTTTTCAGGTGCCTGCCGGAGGTTTTAAACTCTGCATCTTAAGTGATTTCTGAGTAATAAACTTAAAATAAGTCA
>21 a4a_5138
ACAAATCCATATGCGTGTGTGGCGGGGAGACCTGCCCACACGAATATTAAACCTGCCAGTTCTCCGAGAGGGGTGCTGGTTGGAAATAAATGCGTGTAGTGTTGACAGTGTGTGAGTGATTTTTAATTATTGA
>210 a15igrp_3305
CCGAGTGAGGGCCCTCTGGGTCCAACCTCCCACCCGTGTTTATTGTACCTTGTTGCTTCGGTGGGCCCGCCTCACGGCCGCCGGGGGGCATCTGCTCCCGGGCCCGCGCCCACCGAAGACACCTAGAACTCTGTCTGAAGATTGAAGTCTGAGTGAAATTATAAATTATTTA
>211 a13igrp_8860
TTGAACTGTCGACATGAGCTGTTGCTGGTCCTCAAACTGGGGGCATGTGCACGCTCTGTTTACACATCCACTCACATCTGTGCACCCTCTGTAGTTCTATGGTCCAGGGGAGAGACTCTGTCCTCCTCTCATAGTTCTACATTACCACACACACACTGTAATAAAGTCTTATGGAATGTATTCCGCGTTTAATGCAATGCAATA
>212 a1ogrp_4492
GGGAGTTGATGACGATGATTATATTACTAGTAGGGTTTATTCAATGCTAGCAAAAATACACACTTAACAATAACAAGGAGTAAATTTACATGAG
>213 a12igrp_33994
CCGAATTTAATTCCGGGGTTGTAGCTGGCCATTGTTTTGGCATGTGCACGCCCTGGTAATCCAAATTACTTACACCTCTGTGCACTATTATGTGGGATTGATGAAGCTTCGGTGCTTGCGCTGATGGCATTATCATTCTCATGTTTTCATATACACTCTTCAGTATAGAATGTTATTGCGTCAAACGCATTTTAATA
>214 a5i_22364
ATAATCAAGTGTTTTTATGGCACTTTCAAAAATCCATATCCACCTTGTGTGCAATGTCATCTCACTGGAGGTCAACGGCTGTAAAAATCCGTTGGTCACCTTTGGGATTTATATCTACTCAGAACTTTAGTGATTTTGTCTGAAACATATTATGAATACTTAATTCAAAATA
>215 a19igrp_423
CAGAGAATGGCTTCGGCCAAACTCCAACCACTGTGTACTCCCTTTGTTGCTTCGGCCTTGTGCCGGAGACCCAAACTATTATTTTTTGTCTGAGTCCTAAATAAGTTA
>216 a18igrp_6650
GTGAATTTTAGGGTGCCTTCTACTTCGGTAGTTAAGGGCCCGATCTCCACTCTCTAACATTTGTGCACTAAAAATTAGTGATCGAAAGGGTCTTTTTCAATAAGGACTTGACTACGTCACTTTTTCACAATTACAATACTCTAAAAAGTCAAAGAATGTAACCAAAACCATAACAAAATA
>217 a4a_1890
AAGAGTTCTAACAAACTCCCAAACCCTTGTGAACATACCTGTATGTCGTTGCTTCGGTGGACAGCCCCGGGGAGGGGCCGCGCCTCTAGCGAGGTGTCCGCCGGAGGACCAAACAAAACTATTGAATTATTGGCCTCTCTGAGTATAATACAAATAAGTTA
>218 a4d_7163
CCGAGATAGGGTCCTCCGGGGCCTGACCTCCCACCCCATGCGTACTTACCTTTGTTGCTTTGGCGGGCCGCGGGGCCTCGGCCCCCCGTCGGCTTCGGCGGACGAGCGCCCGTCAGAGACCCCCTCAACCCGTCTCATCGTGAAGTCCGAGCAGCGATTTAATAGCTA
>219 a20ogrp_3371
TTAGAAGCGCCGAAAGGCTGCTTATAACCATTGCGAACCAATCCATCAGCGTTGCTTCGGCGGGAGACGGGCCCCACGGCCCCGGTCTCCGGACCGCCCGCCGGAGGTAAGAAACTCTACTGTATCTCTGTGACATCTCTGAGTAATCAAACAAATAAGTTA
>22 a19ogrp_1245
CAGAGTTCATGCCCTTATGGGTAGACCTCCCACCCTTTGTTATACATACCTTTGTTGCTTTGGTGGGCCGCCTTCGGGCTATCAGCTTCGGCTGGTACGTGCCGGCCAGACAACGAAAATTCTGAATTAGTGTCGTCTGAGTACTATATAATAGTTA
>220 a4k_4439
ACAATGAATCTCTTCATTAACACAGTGAACTGTCGGGTTAGAGTCAAGCCGGGTAAAACCAGCGGAAACTCTGCCCAAACCCCAAACACTATAACTTTAATCAGAGTCAAATAACTTTTGTTATATAGA
>221 a1igrp_2514
CAAAATTATACGTGTGTTGTGTCGTGTGCAGGCAGCCGCAAGGCTCCTGTTACTCGAGCACACCAATTTACGCTTGTTGTGTTTGTCAGAGTTATTTGTGACTGAAATTATAGA
>222 a13ogrp_1356
TCAAATCAATTTGGTGCGGCCAGGGAGAGGTCAAGAGCAATTTTGGCTGATCTCGGCTAATCCTAATAAAGTCGGGGTGCAAGCCCTGTATCTATTCACGCTTGTATTGTTTGACAGAGTACAATTGACAAATTAAATAGA
>223 a1igrp_7871
CAGAGATCATGCCCTCACGGGTAGACCTCCCACCCTGTGTTATTTACTATTGTTGCTTTGGCAGGCCGCCTTCGGGCTCTCGGCTTCGGCTGGGGTGCGCCTGCCAGAGGACCCCAACTCTGTGTTAATTGTCGTCTGAGTACTATATAATAAGTTA
>224 a11igrp_58
TCAAATCAATTTGGTGCGGCCAGGGAGGGGTCAAGAGCAACCTCGGTTGATCTCGATCGATCTCGGTCAATCCTAATAAGGTCGGGGCGCAAGCCCTGTATCTATTCACGCTTGTATTGTTTGACAGAGTACAATTGACAAATTAAATAGA
>225 a10ogrp_2522
ACTAAATCCGCACACAACATGTGTGCATAAACCTTGTGAATAGCCCCTCGGGGACGTTGGATGCCAACGATCTATATCTTAGAGTCTGAATTTTTTAAAATATTAAAAA
>226 a8ogrp_4364
AAAATGAAGCCGGGAAACCGGTCCTTCTCACCCTTGATTATCTCAAATTGTTGCTTTGGTGGGCCGCGCAAGCACCGGCTTCGGTTGGATCGTGCCCGCCAGAGGACCACAACTCTGTATTATATGTCGTCTGAGTACTATAAAATAGTTA
>227 a16ogrp_11422
ATCGAATAAACATGTTTCTCAGCATGAATTTCAAAACCCATCTGTGTACCATACCTGTTGCTTCCGTGCTGCGCGTGCAGAAAAGTATGCCGCCAAGGCCTTCTCTCCATGTCGAGGGTTCCCTGGTGCGTCGGCACGGAAGGTCTTACAGCAAACTCTTGCATTTCCATGTCTTCTGTCTGAACTGTCATACACAATAAGTTA
>228 a1l._3511
TTGATTTTGATTTGTTACCTTCTGTGCTGGCTCCGGCATGTGCACGTTGGTGACTTTCATGCAATACCCTTTTGTGAACCTTTGGCCTCATGCTGGCTTTGGCTGGCAGAGGATTTTACACAAACTTCAATGTAACAGAAAGAACTTGTTGTGCGCAAGCACGAATGTA
>229 a9ogrp_16325
ACAAATCTAAACCGTCCTGGACACTTGTGTCCTCGACAAATCCACACCTGTGCATCGTGCGAGCAATCGTGCGAACGAACATATGTAGATGGCCAGACGCAAGTCTTGCTAGCTATTATATAAACGTCTAAAACATGTCTTAACATTGTAACAAATA
>23 a1i_5
GTGTGGAGGGTTTGAGTGAGAGTTGGGATGGGCGATTAGAATCAATTTATTTTATTAACTACTACA
>230 a9l_6020
CAAATCCATCCACGTCTCAATCTTGAGACCACGTTGAAATGTTCCCCGGAACCTCTGTTCCCTCTGTGCGTGCTAGCTTGTCTGGCTGCCCTAGGAGACATGTTCTGGGCTGTTAAACTAGTCATCTCTGTTGCTCAAATGTATCTTGATTTCAATCAAACGAAAACTTGTA
>231 a20igrp_4995
ACAAATCCGATAATGTGGAAGAGGGGAGACCCCCCGATTTTACAATATTAAACCGCCGGGTCGGTCTCTGAGACTGGCTGGCTGGTATATCTATGCGTGTAATGTTGACAGTGTGTGAGTGATTTAATTATTGA
>232 a20ogrp_3179
AACATCATCGGGGAGTTGGATCCAGCTGGCAGGGCTTCGGCCCCGCCTTCTGGCCCTTCTCTTACTGATTATACCCATGTCTTTTGCGTACTATTTGTTTCCTTGGTGGGCTTGCCTGCCGATAGGACATCATTAAACCTTTTGTAATGGCAGTCAGCGTCAGAAAAACATAATAATTA
>233 a13ogrp_1829
GTGATTTGGCCGAGAGGCCTTTGTCCAATCCTCACACCTGTGAACTCGTCGGTGGGCCTGGCCCGCTGGACTATACAATACTATGTGTAATGAACGTCTTTATCATAACAAAAACA
>234 a8b_11062
CATTCAAGTAGCCTAGCTACTTGTTTATACCCGTTGTTTTTGCGGTACCTATTGTTTCCTCGGCGGGTCTTGCTCGCCGGTTTGGACTAAAACTATAAACCTTTTTAAATCTTCAATCTAGCGTCTGAATTATTTATAAT
>235 a4j_13734
CAGAGTTGTAAAACTCCCAAACCCATGTGAACATACCTGTTGCCTCGGTGGCCTACCCGGTAGCTACCCTGTAGCTACCCTGTAGTCCGCCGGCGGAATTCAAAACTCTTGTTTATTTATTATCTCTGAGAATAAAACAAATAAGTCA
>236 a9ogrp_11144
CGCATAGTGAGAGCCGGAAGACAGTCCCCCTGTAGCAAAAATTACGGGGGGTAGGACTCTTGCCCCGAGCAATCGGGTTACCCTGCTTTTTGAGCACCATTTGTTTCCTCGGCGGGCTTGCCCGCCAGTGGGGACCCCCTAAAACCTTTTGTAATGAGAAGTAACCGTCAGTAAGATAAAAATTATCA
>237 a2ogrp_19459
GTGATTTGGCCGAGAGGCCTTATAACATCATCCTCACACCTGTGAACTCGTTCGGGCCGGGTAAGACCGGTCCGAAACCTTTACAAACATATGTGTAATGAACGTGTATACCTATAACAAAACA
>238 a15ogrp_5210
CAGAGTTCATGCCCTTCGGGGTAGACCTCCCACCCTTGTGTATTTATACCTTTGTTGCTTTGGTAGGCCGTTGGGCTTCGGCCTGGCTACTGGCTCCGGCTAGTGAGTGCCTACCAGAGGATACCAAAACTCTGAATGTTAGTGTCGTCTGAGTACTATATAATAGTTA
>239 a4a_8068
CAGAGTTCATGCCCTACCGGGTAGATCTCCCACCCTATGTTATTATTACTTTGTTGCTTTGGCGGGCCGTTAGGCTCCGGCCCGACTACCGGCCCCGGCTGGTAAGCGCCCGCCAGAGGACCCAAAACCCTGAATATTAGTGTCGTCTGAGTACTATATAATAGTTA
>24 a6igrp_211
GTGATTGCCCTAGTGGCCTAAAACTATATCCATTTACACCTGTGAACCGTTTGATTGACACTCTGTGTTGATTTTACAAACAATATGTAAAGAAAGTCAAGTTATTATAACAAAAAA
>240 a13ogrp_485
TTGTAGGCGCCTTCGGGCCCGCTAAATCAATAACCCTTGTCTTTTTTGTGCACCCTTTGTTTCCTCGGCAGCTCCGCCTGCCAACGAGGACCCCCTAAAACCTTTTGCAATCCTAGTATAACAATCTGAAAACAAACAACATTA
>241 a8ogrp_10664
CTGAGATCATGCCCTCACGGGTAGACCTCCCACCCTGTGTACCTTACCTTTGTTGCTTTGGCAGGCCCGCCTCCGGGCACTCGGCTCCGGCTGAGCAGCGCTTGCCAGAGGACCCCAACCCTAATGTTTACGTGTCGTCTGAGTACTATATAATAAGTTA
>242 a14ogrp_17550
ATGAAACGAATGTCGAGAGGGTTGTAGCTGGCCTTTTGGGGCATGTGCACACCTCGATCGCATATCTACCTCTCACACCTGTGCACTACGTGTAGCTTGGGATGATCACGACGTTAGAAATGACGTCGAAAGCCCTAGCTATGATTTTTTAAAACCCATGTATGTTACGGAATGTATGACGTTATAGTGCGTAACAGCACGAATATATA
>243 a5i_232
GTGATTGGCGAAAGCCTTTACCTTTCATACACCTGTGCACCGTGGTCTTCGGACCTTTTACAAACAAATAGTTAAGAACGTAAAACATTATAATAAATA
>244 a8igrp_9388
TCGAATTAAACCTGAAGCAGGTTGTTGCTGGCTCTCCTTCGAGCGCATGTGCACGCTTGTTTCTCTTTATTTCTCCAACTGTGCACAATTTGTAGACTGTTTTGAGGATTTATTTCCCTTGGTCTATGCTTTCACAATCTCTGAATGTAATGTAGAATGCTTTTGAATCTGGGGAATAATACATA
>245 a5k_16317
CAAGAGTAGCCCTAGGCTCTCCAACCCACTGTGAACATACCTACGTTCCCCCGGCGGGCTCAGCGCGCGGTGCCTCCGGGCGCCGGGCGTCCGCCGAGGGCCCCCAAACCCGAATTTATTACGTGTATATCTGAGGGGCGAAAGCCTGTAAAAATGAATCA
>246 a9f_11493
CCGAGTGAGGGCCCTCTGGGTCCAACCTCCCACCCATGTTTATCGTACCTTGTTGCTTCGGCGGGCCCGCCTCACGGCCGCCGGGGGGCTTCTGCCCTCTGGCCCGCGCCCGCCGAAGACACCATTGAACACTGTCTGAAGATTGCAGTCTGAGCAATTAGCTAAATAAGTTA
>247 a8ogrp_10953
TCGTACAATGGAGGTGCTGGGGTTGTCGCTGACCTTTGAAAGGGTCGTGCACGCCTCGGTGCTTTCACACATAATCCATCTCACCCCTTTTGTGCATCACCGCGTGGGGGTCCCTTTTAGCTAGTTCTGAAGGGGGCTTTCATGTTTTTACAAACACACCCTTTTAATGCAATATGTAGAATGTCTTACTTTTTGCGATCACACGCAATCAATA
>248 a17igrp_6100
TAGAATAAACTTGAACGGGCTGTTGCTCTCCTATGGTGCACGCCTGTCATATTTATCTCTCCAACTGTGCACACTTTGTAGACCTGGTGTTTTGGGAATTGCTTACAGTAGTTGGCCTTGCCCTTTGCTTCTCGCCAGTCTATGTTATTTTATCACAACCTCTGAATGTTTTGAACTTTATGATGGAAATTATATA
>250 a120grp_2160
GTGAACAGCCGAAAGGCTTTATCCACACACACTGTGAACCGAGGCTTCGGCCTTTATTACAAACTATGTGTATGAATGTATATATTATAATTAAAA
>251 a20ogrp_7068
GTGATTGAGCGCAAGCTCTTATCAAATCCAAACACACCTGTGCACCGTGGTCTCCGGACCTATACAAACCTAGTGTAATGAACGTGACATATGATAAACAAATA
>252 a4igrp_2080
CAAGTTCTGTAGGTCTGTCGCAAGACATAGGACTCTATATACGCGTGTTGTTGTTTGACAGAGTTATATGAGAGACAATTATGA
>253 a19ogrp_5213
CAGAGTTCATGCCCTCATGGGTAGACCTCCATCCTTGTATATCTTACACCGTTGCTTTGGCAGGCCGTCTCACGGCCGCTGGCTCCTGCTAGCGAGTGCCTGCCGAAGAACCATCAAATCAATATTACCAGTGTCGTCTGAGAAATATATAATATTTA
>254 a1c_9352
CCAGATGAGGGCCTCGGCCCCCGTCCCAACCCTTTGTTGACCAAAACCTTTTTGCCTCGGGGGCAGAGCGTCCGCCGCCGCCCCCGGAGGGCCATTAAACACTGCCTCTTTACGTCGGAGTCTTAATGAAAATAAATTA
>255 a18ogrp_172
GAGAATGGCCGAAAGGCTTTATCCACACACACTGTGAACCGTGGCTTCGGCCCTTTATAAACTATGTGTATGAATGTATATATCATAATTAAAA
>256 a1igrp_10879
ACAAATCATGATGGTGGCTGGTTGTGTGGTCATTGCTGACCACGCTTACCCCCCATATACACCCAAACCCGCGCAGCGATGCCGGGTGCGGTGCGCTCCCTCCCTTCCCTGCAAAGGTGAAGGGGACGTGGCGCGGCGAAGACTGGCGTCTGCAAGGACGCCGGTCCGACCCACATAGACGCTTGTATGTTTGACAGAGTTAGTTGACACTTTAAAATGA
>257 a8l_27875
CAAATCCATCCACGTCTCATATTCTGAGACCACGTTGAAATGTTCCCCGGAGCCGCTGTCTCCTCGGTGCGCGCCAGCTTGTCTGGCTGCCCCTGGAGTCATGTTCTGGGCTGTTAAACTAGTCATCTCTGTTGCTCAAATGTATCTTGATTTCAATCAAACGAAAACTTGTA
>258 a15ogrp_19598
CAGAGTTGCAAAACTCCCAACCATTGTGAACCTACCTCACCGTTGCTTCGGCGGGTGGCCCGCTACCCGCGAGCTGCGCCGGCTGCCCCTCTAGGGCATCCGGCACCCCGCCAGAAGCCCGAAACTCTGTTATTAGTGGCCTCTCTGAGTAACTTATACAATAAGTCA
>259 a5i_16871
CTATCGTCAATGTACGATCGTTGAACGGTAACGATAAACCGGTAATCAGTGCAACTTAGGTTGGCCTGTGACGGGGACGCTGCCCTTGATACAAATGTTATCGGGCCCGTCCTGAGGAACGCCTTTGGGCATGTTCCGCCTGAACCCTTTGCTTATACCGTACCTTTTGTTGCTTCCTCGGCGGGGACGCTCGCCGGTGGATAGCCCTTTGAAACCCTTTGCAGTTGCAATCAACCTCTGATGTGGACTATGAATTTAATAA
>26 a2ogrp_1568
ATCGAATGAACATGTTTCTCAGCATGAATTTCAAAACCCATCTGTGTACCATACCTGTTGCTTCCGTGCTGCGCATGCAGTAATGCGTGCCGCCAAGGCCATCTCTCCGAGCTTTGGAGGGGTCCCTGGTGTGTCGGCACGGAAGGTTTTACAGCAAACTCTTGCATTCCCATGTCTTCTGTCTGAACTGTCATATACACAATAAGTTA
>260 a9igrp_17105
CAAAACAGAGTACCCGTACTCTACAACCCTATGTGAACATACCATTGTCAGTTGCTTCGGCGGGAGGCCCCTGGGAGGGGCCCCGGGGCCCGGCCTGAGCCGGGCTCCCGCCGGAGGGGCGCAAACGAAACTCTTGCTGTACCCAGTGGCACCTCCGAGTAAAAACAAATAACAAGTTA
>261 a11igrp_634
GTGATTTGGCCGAGAGGCCTTATAACATATCCTCACACCTGTGAACATGTCGGCCGGGTAAGACCGGTTCGAAACCTTTACAAACATATGTGTAATGAACGTAAATATCTATAACAAAACA
>262 a9igrp_5627
ACAAATCTCTGCGCTCGGGGTGCTTCGGTGCCCCGTAGCACATACACCCGGTGTCGGGAGGGCTTCGGCCCTGCTGGCCTGGTTGCAGTCCCCGGACTGTAGGCCGTACTGCGAGTGGGCCCTGTGCCTGCCTGCGGTCGACCACATAGACGCTTGTTTGTTTGACAGAGTACAGTTGCTTCATAAAATGA
>263 a5j_9229
AAGAGTTGCAAAACTCCCAAACCATTGTGAACTTACCTTCAACGTTGCTTCGGCGGGTTGGCCCCGGTCTCCGGGGTCCCCGGCCCTACTCGGGCGCCCGCCGGAGGTATCTAACTCTTGAACTTTTATGGCCTCTCTGAGTCTTTGTACTTAATAAGTCA
>264 a5k_438
TGAATTAATAATATTTGTGAAATTTCAACAAACAACATCAATTTTATAGTCTATTATTTTTAATTA
>265 a16ogrp_950
TTATAATGCGTGGAAATGCCCCTAATAAGGGCATACTCTATAAAACTCTAAACTTACTGTCTGAGAAGGCCATGTGCCGTAATCTTTAAACATTTTA
>266 a2d_25611
ATGAAACGATGTCGAGAGGGGTTGTAGCTGGCCTTTCGGGCGATGTGCACGCCTCCGATCGCATATCTACCTCTCACACCTGTGCACTACGTGTAGCGTTGGGGATGATCGACGACCGTTAGAAAGTGACGTCGAAAGCCCTAGCTATGATTTTTATAACCCATGTATGTTACAGAACGGACGACGTTATAGTGCGTAACAGCACGAATATATACAACTTTACAGCAAACGGATACTTCTTAGGCGTCTCGCATCGATGAAGAACGCAGCGAAATGCGAT
>267 a20ogrp_8238
TCGAATGAAACTAGAGTTGGTTGTCGCTGGCCCCTTCACCGGGGCATGTGCACGCCTCCTCTATTCATCCACACACACCTGTGAACTTGTGAGACGGATAGTAGCCCTTTCGGGGGCGAGGTCCGTCTGCTATACATAAACTCCAATATATAAATTTGAATGTAATTGATGTAACACATCTTTAAAC
>269 a20ogrp_17822
CAGAGAACATCGCCCGCAAGGGTGACTCTCCAACCCCATGTTAATTATACCTTTGTTGCTTTGGCGAGCCGCTTCGGCCACCGGCTCACGCTGGTGAGTGCTCGCCAGAGGACCCAAAACTCTGTTTATACATGTCGTCTGAGTACTATATAATAGTTA
>27 a13ogrp_28688
CCGAGTTTTCAACTCCCAAACCCTTATGTGAACCTACCTATCGTTGCTTCGGCGGACTCGCCCCAGCCGGACGCGGACTGGACCAGCGGCCGCCGGGGACCATCAAACTCTTGTATTATCAGCATCTTCTGAATACGCCGCAAGGCAAAACAAATAAATTA
>270 a3igrp_5216
CTGAATTTGTGCCTTGGCTGGGAACGGGCAACCAAGTACCGCCTCTGGCAGATTTACACCTGTGCAACCTAATGTCTCTTGGGGGACTCGTGCCCCCAGCAGTGATAAACACCTATTGACCACGTCTGAACATTATATTAAATATAAA
>271 a7ogrp_5898
CCGAGTACTATAACTCATAACCCTTTGTGAACCTTCATACCTGTTGCTTCGGCGGCGCGCCCTCCGGGGCGTGCCCGCCGGTATCATCAGAATCTCTGTTTGAACCCGACGATACATCTGAGTGTTCTAAGCGAACTGTTA
>272 a8ogrp_14608
CAAATCTTTTGCGAGAACTGTGTGCTGCTTGCAGTGCGCAGTGACTTGCAACATTAGCACAGGGTTGCAAGACTCTGATGTTTACGCTTGTTTGTTTGACAGAGTTAGTTGAGAATAAATAAAGA
>273 a1igrp_559
CAGAGTTCATGCCCTTCGGGGTAGATCTCCACCCTTTGTATTTTATACTCTTGTTGCTTTGGCAGGCCGCTGGGCTTCGGCCTAGCCACCGGCTCTCGCTGGTGTGCGCCTGCCAGAGGTTATCAAACTCTGAATATTAGTGTCGTCTGAGTACTATATAATAGTTA
>274 a16ogrp_14631
ACGAATTCATTAGGAGTTGTGCTGGTTCTTACAAGTGCACGCTCCTTACAATTCCATTCACACCCTTGTGCACTCTAAGAGACGTATCTCCCCCGTTTACGTGCCTTTATCGGCTCGGGATTTCGTCTGTTTAACACACTCTTATTGTAATAGAATGTAATCTGGCTGAAAGGCCTAAAATTTAAATA
>275 a12igrp_4924
ATATAGATGATGATGGATTTATATACTGGGGGTTTATTGAGTTATTCAACCAGCACACACACATGATTACAAACTAACAATACACAACATACAGAAG
>276 a16ogrp_372
AAGATTTCGACCTTCGGTCAATCTCTCTTCAGCTGTGCGCTTTGGCTGCACGCTGTTGAAACCTCCCACACCTGTGCACCATTCGGTTGCGGCCTAGGTCGCTTCCGCTTTTACACATACAACTACAGTCTAGAATGTTAAATACAATAACAAATAA
>277 a5i_6871
GAGATTGGCCGAAAGGCTTTATATCCACACACACTGTGAACCGTGGCTTCGGCCTAAACTACGTGTATGAATGTAAATATTATAACAAAAA
>278 a8ogrp_1543
TTAAATGCGAAGTCATCACTGACCTAGCTTTATAAATCCCTTATTACACCTGTGCACCTTATTGTCTTCGGACAATTTATTACAAACATCAGTGTAACGAATGTAAAGTATTATAATCAATA
>279 a2igrp_5736
GTGAGCCGAGAGGCGTAAAATCCAAACCTCTGTGAACCGTGCCTCCGGGCTTTACAACAAACCAGTGTGATGAACGTAATACAATATAAACA
>28 a2igrp_7206
ATGAGATCATGCCCTTCGGGGTAGACCTCCCACCCTTTGTTTACAATACCTTTGTTGCTTTGGCGGCCCCGTCGCAAGACAACCGGCTCCGGCTGGTCAGCGGCCGCCAGAGGACTCAAAACTCATATTATTATTGTCGTCTGAGTACTATATAATAGTTA
>280 a19ogrp_13473
CACAATATGAAGGCGGGCTGGACACCCTCCAGCCGGGCACTGCTTCACGGCGTGCGCGGCGGGAGCCGGCCCTGCTGAATTATTCACCCGTGTCTTTTGCGTACTTCTTGTTTCCTGGGTGGGCTCGCCCGCCATCAGGACCAACCATAAACCTTTTTGTAATAGCAATCAGCGTCAGTAACAACGTAATTAATTA
>281 a1ogrp_7915
CACTCAGTAGTTTTCTACTGCTCAGGGGGAGCGGAAAGTGTTTTGCACGAGTACGCTCTCTTTCTGAACCCTTGTCTTTTTGCGTACTTCTGTTTCCTCGGCGGGTTCGCCCGCCGGCTGGACAACTCAATAACCTTTTTAATTTCAATCAGCGTCTGAATAATTTTAATAATTA
>282 a4i_3656
ATAAATGAGCGCAAGCTTTTATATTATCTTTCTACACCTGTGAACTATTTGCCTTCGGGCACTACAACAAACATAATGTAATGAATGTAAACTATTATAACAAAATTA
>283 a4l_1471
CAAGTTCTGTAGGTCTGGTTCGCAAGACGACTGTACGGTCTATATACGCGTGTTCGTGTTTGACTAAGACGTTATAATGACGAGAC
>284 a8j._17484
ACAAATCTTTACACACGATCTCCTTTCCTTCGGGAGAGGAGACTCGACACACGATTAAGGTTGACAAACATTGAGACAATCAATTAAAAA
>285 a11igrp_22548
CCAAAAGATAATCTTTCACTCGAAAGATCTTTTCCTTTGTGCTGGCTTTGACCGTATGTAATTTTGGGACTTAAACATGGTAGCCTTACGGTTGCCGGTCCCAAAAACAATATATCATCCTTATAAAAACTTACTGAACAACTAAACAATGATTTAATAATCTGTTTAAAA
>286 a4l_10092
AAAATGAAGCCGGGAAACCGGTCCTTCTCACCCTTGATTATCTCAATTTGTTGCTTTGGCGGGCCGCGCAAGCACCGGCTTCGGCTGGATCGTGCCCGCCAGAGGACCACAACTCTGTATTATATGTCGTCTGAGTACTATAAAATAGTTA
>287 a4c_29935
TCGTATAAACTTGAACAGGCTGTTGCTGGCTCTCGGGCGCGTGCACGCTTGTCTCATCTTTGTATTTCTCCAAACTGTGCACATTTGTAGATCCTGGTATGATAGAATTAATTTCGAAGTCGGGACTGACCGTTGCTTTTCTTTGGAAAGGCCGGCTTTTCCTTGTCCAGGTCTATGTCATTTTTCACAACCTCTCGGAATGTATGTAATGTTGGCATAACAATAAAATATA
>288 a9igrp_114
TCGTAGGGCTTTTGTCCTGTCGAGATAGCGTCCTTGCCTATTTTTTGGAGTACCTTTTGTTTCCTCGGCAGGCTTGCCTGCCACTGGGGACCCTTTAAACTCTTTGTAAATACAGTATCTGTCTGAAAAAACAAACAAAAATCA
>289 a5b_11277
GTGAATAACAGGACGTTCAATTTAACTTGAAGTCCGAACTCTCACATCTAACCCTGTGCATTTGTTTTGGTTAGTAGAGCGCTTGCGTTCGAACACCTCTTCATTTTACAAACACTAAGTCAAAGTATGTTTAAATTTATAACAAAACA
>29 a9l_690
CCGAATTGCCAACATGGGTTGTTGCTGGCCCTCAAATGGGGGCAAGTGCACGCTCTGTTTGCACATCCACTCACACCTGTGCACCCTCTGTAGTTCTATGGCCTGTGGGGGACTCTGTTCTCCTGTGCTGTGGTTCTATACCTTTACACACACACACACTGTAATAAAGTCTCATGGAATGTATGCCGCGTTCGACGCAATACAATA
>290 a20ogrp_27700
CACAAATATGAAAGCAGACCCCCAGAGGGGCGACTTCTCGTGCCGCGTCCACTGCAGTCCTGTGCTGTTGTGCTGAAGCGGCGGGGGGAGACGCCTTTGTGGGCCAGTCTGACTCCATATTCACCCATGTCTTTTGCGTACTACTTGTTTCCTTGGCGGGTTCGCCCGCCAATTGGACCACATTAAACCTTTTTTGTAATTGCAATCAGCGTCAGCAAAACAATGTAATAAATTA
>291 a20igrp_8360
CAAATCTTTTGCGAGTTCTGCGTGCTTAACCGTACGTAGTCTCACAACATTAGCACAAGGTCGCAAGATCTTGATGTTTACGCTTGTATGTTTGACAGAGTTAGTTGAGAATAAATAAAGA
>292 a8ogrp_1560
ACTATATGCAAATAATCCTTGTGAATTAGAGAAGTATTCTCTGTGATATAAAGCCTTTAAGAGTTAGCCTTGATATTAAATGA
>293 a15ogrp_23141
CAGGACTCGCAAGACTCCTTAAACCCCTGTGAACTTACTGTTTATACGTTGCTTCGGCGGGTGCTCCGGGGTCCGCCTCGGGGCGCTGCGCCCGCCGGCAGCCTTCATAATTCTGTTTCTCTGCGTTGGCATCTCGAGTAAGCAAAAATAAGTTA
>294 a2i_4086
AAGTTATAGTCCCCTGGCCCTCTGGGCTGGGGTCTTCTATACCACCCTTTGTTTATTACACCTTTGTTGCTTTGGCAGGCCTGCCCTCGGGCTGCTGGCTCCGGCCGGCTCGCGTCTGCCAGAGGACCTAAACTCTGTTTGTACATGAAGTCTGAGTACTATATAATAGTTA
>295 a9l_12213
CTGAGGGGCTTCGGCCCCGTCAAGATACCACCCCTTGCATTTTGAGCACCTCCTGTTTCCTCGGCGGGCCCGCCCGCCAATGGGGACCACAACAAACCCTTCTTGTAGTTGCAGTAAACGTCGAAAAACACAATTAAAATCA
>296 a16igrp_9243
GTGTAGGAGGGTTTGAGTGAGGAGTTGGGATGGCGATTAGAATCAATTTATTTTATTAACTACTACACAACTGCCTGACAATGGATCTCGGTGGG
>297 a19igrp_10006
CAGAGATCATGCCCTTCGGGGTAGACCTCCCACCCTGTGTTATTTACAATTGTTGCTTCGGCAGGTCGCCTTCGGGCGCTCGGCTCCGGCTGAGGTGCACCTGCCAAAGGACCCCAAACTCTGTGTTTAGTGTCGTCTGAGTAATATTTTAATACGTTA
>298 a5i_16692
ACGAATTTGAAAGTCGGTCGTCTGTGCTGGCGCAACCACGCATGTGCACGTCGATCGGCAAATCATCCACACACCTTGTGCACACCTAGACCACAGAGCGGTTCGTCGGGATCTTCGGGTCTTGGCTTGAGCAACTCTGTCGGTACTTTTTTCACACACTCGTATGTGATTGGGATGTCCAAGTGCTCTTAAGCACGATAAAGTTAAAA
>299 a2d_9790
GTGATTTGGCCGAGAGGCCTTATAGCATCATCCTCACACCTGTGAACTCGTTCGGGCCGGGTAAGACCGGTCCGAAACCTTTACAAACATATGTGTAATGAACGTATAAAACCTATAACAAAAACA
>3 a5i_4366
CTGAGTACTACACTCTCTACCCTTTGTGAACTATTATACCTGTTGCTTCGGCGGCGCCCGCAAGGGTGCCCGCCGGTCTCATCAGAATCTCTGTTTTCGAACCCGACGATACTTCTGAGTGTTCTTAGCGAACTGTCA
>30 a4a_971
CAGAGTTCATGCCCTTCGGGGTAGACCTCCCACCCTGTTTATATACTATTGTTGCTTTGGCAGGCTGCCCTCACCATGGGGCGTCCGGGTTCCGCCCGCGTCTCGCCTGCCAAAAGCCCCCTAATTCTGTGTTCTGTGTCGTCTGAGTACTATATAATAAGTTA
>300 a4a_1517
CAAGTTCTGTAGGTCTGTCGCAAGACATGACTCTATATACGCGTGTTGTGTTTGACAGAGTTATATGAGAGACAATTATGA
>301 a2igrp_5069
CCAGATGAGGGCCTCGGCCCCCGTCCCAACCCTTTGTTGACCAAAACCCTTTTGCCTCGGGGGCAGAGCGTCCGCCGCCGCCCCCGGAGGACCATTAAACACTGCCTCTTTACGTCGGAGTCTTAATGAAAATAAATTA
>302 a120grp_7968
CCGAGTTTCCAACTCACAACCCAATGTGAACATACCTACGTTGCTTCGGCGGCATCCGGCCCCAGGCCGCGCCGCCGGAGACCCAAACTCTTTGTTTTCCAATGTGGTTACTTCTGAGTATTCTTGAAATAAATCA
>303 a9f_1896
GCAAAAGAGTTGGGTGGACGTGGGTAATCACGTCTATTCTAAAGCACAGAGACGTCGAGTTTCTGATGTTTGCGCTTGTATTGTTTGACATTCGTACCACTTTAAATATA
>304 a5a_602
ACAAAATATAATTTTACCTTTGTGAATTGGGTAGCTAATTTATTAGCCGCCTCTTTTTAACTTTAAGTCTAAATCTATACAATAATTATATAA
>305 a5c_9735
TCGTGGGGATTTATCCCCTTTAGATAGACACCCTTTGTTTATGAGTACCAATTGTTTCCTCGGCGGGCTTGCTCGCCGTTGGACCTGCAAAAACCTTTGTAGTAGCAGTATCTTCAGTTACAAAACAAATATTA
>306 a4k_2742
ACAATACCAAACTTTAACCATGTGAATTGCCTGGCGCAAGCCGGGTCCTGCGGTGGCTGGTGCGTCGGCGTGTGTGGCTTCGGCCCGCTGCCGCCGCTGCTGCTGCAGACGTCAACTAGATGTCTAAATAAAAGTCTTAATCGAAA
>307 a2igrp_3552
ATGAATGCAAGAGTGCTCTTTTTAGAGGCTCGACCCATATATCCTTTCACACTGTGCACACACTTCATTTTTTACACCAATTTTAAACACTAGTATTAAGAATGTAACCAAGTCTCTTAACCGAGCATAAAAGTTAATA
>308 a3igrp_18420
ACGAATTGTAAAGGAGAGTTGATGCTGGTAGCTTTTGGGTTGCATGTGCTCGCTCTCTGACATTTCATTATCCATACACCTGTGAACCTTTGAGGGAATCAAGTCTTTGCGGATTTGAGGCCCTCTCCTATTAGCACATACCCCTTTATAAAATATTGAACGTGATAGTGCCGAAAGGCCATAATCAAATATA
>309 a9c_3537
CCAGAGTGCCACTAGGCTCTCCAACCCATTGTGAACATACCTACGTTTCCCTCGGCGGGTCAAGCGCGCTGGGCCTCCGGGTCCTGGGCGTCCGCCGGGGGCACTCAAACCCGAATTTTTAGTGAATTTCTGAGGGGCGAAAGCCCGTAAAATAAATAAATCA
>31 a5d_4174
AAGAATTCGCCCTTCGGGGCTCTCTTTATTCACACACCCCTGTGCACTTTGGCCACCTCTTTGTTGAGGTGTGTCTTTTTAATTACCATACCCTATAAACACAAGTTATTGAATGTAAAATCGTTATAAACTAATA
>310 a7ogrp_14388
TCGTAGGGCTTCGGCCCTGTCGAGATAGAACCCTTGCCTTTTTGAGTACCTTTCGTTTCCTCGGCAGGCTCGCCTGCCAATGGGGACCCCCCAAAAACGCTTTGCAGTACCTGTAATCGTCTGAACAACAAACAAAAATTA
>311 a12igrp_22945
ATGAGTCTTTGAAGTGGGTTTGATGCTGGTCTCTCGAGGCATGTGCTCGCCCTATTCTCATCCACTCACACCTGTGCACCTTACGTTTAAGAAGTGGCTGTTGCCTCCCTTCGGGTTGGCAGGTTAGGGAAACCTAGCTATGGCCCTTCTTTGCGTTACTTTACACAAACTCTTGAATGTCATAGAATGTATATTGGCCTACGGGCTTTAATTTAAATA
>312 a6ogrp_301
GAGATGCGGCGTGAGCCGTCAAACCAAAAACACTGTGAACCGTGGCCTCGGCCTCTCAAACTATCTGTACAGAACGTAATCATGATAATCATCA
>313 a2i_2063
GTGATTTGGCCTCTGGCCTAAAACACAATCCCAATACCTCTGTGAACCGTTAGCCCTCGGGCTCAAACATCGTGTAACGAACGTCTATATCATAATCAAATA
>314 a20ogrp_15426
GTGAATTGAATATGTTAGCGGACCTCTTCGGAGTCCCTAGCATCAAATCATATCCATAACACCTGTGAACTGTAAGGCTGTCTTGAAAACGAAAGTGATTAGAGCGCCTGCCCATTTTATACAAACATTAAAGTAACAAACGTAGTCTTATTATAATCTAATA
>315 a8ogrp_15753
CTAGAGCAAAGGATAGACAGCGCCCGTGGAGCTCGCTCCCGGGGCCACCCTACTCTGGTAGGGTTTAGAGTCGTCGAGCCTCTCGAAGAAGCTCGGTCCTGAACTCCACCCTTGAATAAACTACCTTTGTTGCTTTGGCGGGCCGCCTCGTGCCAGCGGCTTCGGCTGTTGAGTGCCCGCCAGAGGACCACAACTCTTGTTTTTAGTGATGTCTGAGTACTATATAATAGTTA
>316 a11ogrp_8294
CAGAGTTGCAAAACTCCCACAACCATCGCGAACGTTACCCACAACTATTATCTCATGGTCTCCTCTGAGTACAGCACATAATAAGTTA
>317 a4igrp_9166
TAGATTGGCCGAAAGGCCGTGTCTCATCCACACACACCGTGGACGCAACACAGTCTGGCCCTCGGACCGACGCTCGTCGGCACTTGGGACCGGACTCACACCAAACGAAATGTAACGAATGTCAATCAATGTAACGAAAACA
>318 a1c_16342
CACAAATATGAAGGCGGGCTGGAACCTCTCGGGGTTACAGCCTTGCTGAATTATTCACCCTTGTCTTTTGCGTACTTCTTGTTTCCTTGGTGGGTTCGCCCACCACTAGGACAAACATAAAACCTTTTGTAATTGCAATCAGCGTCAGTAACAAATTAATAATTAC
>319 a4k_32915
TCGATTTGTGTGTTTACACTTTTATATTGCTCACTATCGCGTCGCCAAAGCAGCAATGCCGAGGCGGCGTGACAGCGACGCTTGACATTGTCATGCGCTTGGCGTGCTCAGAGTGTCGACCGGTTGGCAGGGCCAGTTGGGGGCTTGAGCCAGCTAGCGTCGGCGTACGCGCCAGGCGAATTCTCTTCCATTGTGAGGTACCTAAATGCACTCGTCCGCTGCTGTCGTTTCACCTGCAGTGGCACATGGACGGGGCGCAAGTGCCAGACTCGTGCTCATTACCATTCGCGAGTCGAGAGCGCAAGGTTCAAAGAGTTGGGCTCGAGCTGACTGTTGCTCATACTTCAGTCAGCTGGCGTGCGTTCAGTCGCAAGACTGCAATCGCTCGCTCCCATC
>32 a1igrp_109
GGGGAGAATGTGGTGGTGAGAGAGAGTTGGGCTGAAATGAGAGCATATGCATTTTAAACATCAAATCAAA
>320 a2ogrp_28174
CTGAAGTGAGTCTTCATCATTGAAGCTTCTTCCCATTGTGCTGGCTTTGACCGTATGTTATGTTGGGGATTAAACATGGTTAGAATTTATTTTAGCCGTCCCCAACAATTATCTCATCCTTTATTAAATTGAACTGAACTCATTTTGAGATTACATAAAAAATAATCTTTTAATA
>321 a14ogrp_10389
CAGTGTTCCCTGCCCTCACGGGTAGAAACGCCCACCCTTGTGTATTATATCTTTGTTGCTTCGGCAGGCCGCCCTCGGGCACCGGCTCCGGCTGGATCGCGCCTGCCAAAGGAAACCCAAACTCTGAATGTTAATGTCGTCTGAGTACTATCTAATAGTTA
>322 a14ogrp_5412
ATATAGATGATGATGGATTTATATACTGGGGGTTTATTCAACCAGCACACACACATGATTACAAACTAACAACACACAACATACAGAAG
>323 a8i_10362
CCGAGTTATCAACTCCCAAACCCCTGTGAACATACCCGAACGTTGCCTCGGCGGGACCGCCCCGGCGCCCTCACCGGCCCGGAACCAGGCGCCCGCCGGAGGACCCAAACTCTTGTTTGATTTAGTGGCATATTCTGAGTCTCACAAACAAAAATGAATCA
>324 a11ogrp_943
CAGAGTTGCAAAACTCCCAACCATTGTGAACCTACCTCACCGTTGCTTCGGCGGGTGGCCCGCTAACCACGGGCTGCGTCGGCCCCCTTCTAGGGGGTCTGGCACCCCGCCAGAGGCCCGAAACTCTTTGTCATCAGTGGCCTCTCTGAGTAACTTATACAATAAGTCA
>325 a4i_25334
CCGAGTTTACAACTCCCAAACCCCCCTGTGAACTTATACCATTTACTGTTGCTTCGGCGGGTCACGGGCCCCGGGGAAGGACAGCGGTCGCCGTCAGGCCTCAGCTCGCCCCGCCCCCGGAAACAGGCCGCCCGGCCGGGGAACTCAAACTCTTCTGTTATTTCTTTATCTAATATATACTGTCTAGAAAGTAAAAAACTAAAATAGAATACTA
>326 a5b_2167
CAAGTTCTGTAGGTCTTGTCGCAAGACAATGACTCTATATACGCGTGTTGTGTTTGTACAGGAGTTATATGAGAGTACCAATTATAGA
>327 a5b_13953
CTGAGTGAGGGCCCTCGTGGTCCGACCTCCAACCCATTGTTGTCCGACTCTGTTGCCTCGGGGGCGACCCGGCCTTTGCGGGCTCGGGGCCCCCGACGGTCCACACAACTCTGCATCTTTGCGTCTGAGTAAACATTAAATGAAACA
>328 a8b_13045
TGAATTGTGTATCACACTTTACATACCTAAACACTCTTGCATACGAAGGGTCTCGGCTTGCCGAGACACGCCGTATCGAGAGTAAAAGTCAAACCACAAACATTTAACAAACATGACAAATAACACATGAG
>329 a9igrp_26466
CCGAACTGTCAACACGAGTTGTTGCTGGTCCCTCAAATGGGGGCATGTGCACGCTCTGTTTGTACATCCACTCACACCTGTGCACTCTCCATAGTTCTATAGCCCTGGGGGCTCTGTCCCCCCTGTGCCGTGGTCCTATGTATTTACACACACACTGTAATAAAGTCTCATGGAATGTATGCCGCGTTTAACGCAATACAATA
>33 a19ogrp_28536
ATAATAAGTGTTTATGGGCGACTTTTAAATCCATATTCCGACCTTGTGTGCAATGTCAGTCGAATCTTCTTCATGGAGATCGACCAAACGACTCAACCGG
>330 a1a_2734
ATAACGCCCCGTTTTTGTCGCAAGATTTAAAAATGGGTTCAATACCCAAAACCGTGTCTACCTACCTTTGTTGCTTTGGCAGGCCGCCTTCGGGCGTCGGCTCCGGCTGACCAGCGCCTGCCAGAGGCCCAAAACTCTGTGTTTAGTGATGTCTGAGTACTATAAAATATTTA
>331 a5j_3622
CAAAATCTAGTTGTGGGGTATGGTGAGGTGGTGGGGGGCTAAGTGCGGAGAATTTGAGTTAGTGGAGGGTTGGTGCTTTGGCGCTGGCTCTTCCTTTCTCCACTCTGCGCCTGTCCTTTTCCTACCTCATCTATCCTGAACACATTTACGCTTGTATTGTTTGACAGAGTAAAAGTATACAAATTTAAAGA
>332 a8igrp_11823
ATGAGAACTAAGGGTAGTAGTCTCGGCTACTACTCTGAACACTCCACCCTTTGTTTATATTACCTTTGTTGCTTTAGCAGGCCCGCTCTCGAGCCGCCGGCACCTGCTGGCCAGTGCCTGCTAAAGAACCTAAAACTCTTGTTAATAATATTGTCTGAGTACTATATAATAGTTA
>333 a1b_3361
ATGAGCGAGCCGAAAGGCAAGCATAATATCCATAACACTGTGAACTGTTGGCCTCGGCCAAATTTTTAACAAACTTTGTGTAATGAACGTAAAATACTATAATCAATA
>334 a9igrp_4784
CAAATCAGTTTGGTGTGGTTGTTGTTTGGCTGGGGTTTGTCTCTTCGGGGGTAAGCTCTCCCTCACACTGACCATCATCACATATGCACAGCGGAGGCTCCCGGTGCAAACCAGGACCGATGCTGATGTTTACGCTTGAATGTTTGACAAATCAAATAGGATTAAATTATATA
>335 a2igrp_1433
TTGAATGTTGGTTAATACACTGTGAACCGTCTCTTCGGAGCTATATAAACTCGTCTTGTTGTCATTGCATGTCTAATACAAACAAAATA
>336 a15ogrp_25202
TCGAGTTTACAACTCCCAAACCCTATGTGAACATACCTACAGTTGCTTCGGCGGACTCGCCCCGGCGTCCGGACGGCCTAGCGCCGCCCGCGGCCCGGATCCAGGCGGCCGCCGGAGACCACCAAACTCTTTGTATTATCAGTGTATTCTGAATCCGCCGCAAGGCAAAACAAATGAATCA
>337 a4a_1000
AGAGACTTCTAATTCATCTTCTTACTTCTTTAAGGGCTGGTTGGGCTCGCCCAACCACTTCGTAAAAAGAAGCAAAAACAAACACATTCACACTCACAAACAGATCACACATTAG
>338 a9f_9353
ATGGTAGTATGTTTATATATTTGAGAGACTCTGTTGGAGTGTAGAGGGGGATGTCTTGGCCGATGAAATATTGGCTGAAGCATTATGACTCTGCAGCCAACAGGGTGCATTTACTTTGGCCGTCGTCTGTTGTAACACATTACTAATA
>339 a14ogrp_4879
ACTAAATCCGCACACAACATGTGTGCATAAACCTTGTGAATAGCCCCTCGGGAACGTTGGATGCCAACGATCTATATCTTAGAGTCTGAATTTTTTAAAATATTAAAAAA
>34 a9l_20499
ATAATAAGTGTTTTATGGCACTTTTTAAATCCATATCCACCTTGTGTGCAATGTCAGTCGGTCTTCTTTATGGAGATCGGCCAAACATCAACCTAATTTTTTAACTCTTTGTCTGAAAAATATTATGAATAAAATAATTCAAAATA
>340 a2d_10093
CCGGTTTTGAGTGTCTAGAGTTTACTCTGGATGCTTACAACTCCACCCTTTGTTTACATTACCTTTGTTGCTTTAGCAGGCCCGCTTTAGGGCCGCTGGCTTCGGCTAGCCAGTGCCTGCTAGAGAACCTAAAACTCATGTTAATAATATTGTCTGAGTACTATATAATAGTTA
>341 a4j_25137
TAGAGCTTCGAAATCTAGAGCGTAAAACCTCTAGATGAGATCTCCACCCTATGTTTACATTACTTTGTTGCTTTAGCAGACCCGCTCTAGGGCCGCCGGCTTTGGCTGGCCAGAGTCTGCTAAAGGATTTAAAACTCATGTTAATATTATTGTCTGAGTACTATAAAATAGTTA
>342 a2i_11012
CAGAGTTATACAACTCCCATACCATCTGTCAACCTACCCAGCTATGCCTCGGCGTAAGCTCGGCCGGGGGCGGTCCGGCGCTACCCTGTAGCGGCGGCCGCGCCACCTCGGCCGCGCCCGCCGGCGGTACACTAAACTATGTTTTACTTTACCTTCTGAGCGTCTTATTTTAATAAGTTA
>343 a2igrp_12725
GTGATTTGGTCGAGAGGCCTTATAACATCATCCTCACACCTGTGAACATGTTCGGGCCGGGTAAGACCGGCCTGAAAACCTTTACAAACATATGTGTAATGAACGTGAAATACCTATAACAAAAACA
>344 a4j_10580
ACATTTTTGGAGGCAGGCTGTATAAGTCTGGTTGGCAACAACCAGCATGCCCCTCTGATTTGTACCCTTGTCTATTTGCGCACTCATGTTTCCTCGGTGGGCTTGCCTGCCGATTGGACAAACTTATAACCTTTTTAATTGTTAAATCAGCGTCTGAAACAAACTTAATAATTA
>345 a17ogrp_3819
ATGAGAACTGGTCTCCGGACCAATCTCCCACCCTATGTTTACTATACTCTGTTGCTTTGGTAGACCTGCCCTTGGGGCTACCGGCCTTGGCTGGTTCGCGTCTGCCAGAGAAGTAAAAACTCATATTATTACTATTGTCTGAGAACTATCTAATAGTTA
>346 a2igrp_1754
TCGAGTTTATAACTCCCAAACCCTATGTGAACTTACCACTTGTTGCTTCGGCGCGCGCTTCGGTGCCGCCGAGGACACTTAAACTCTTTGTTTTTATAAGCATTTCTGAGTGGCCGAAAGGCAAAATACAAATGAATCA
>347 a2b_3525
GTGAATAACCTGCTTGGGCAGTCGCTTCGGCACTGCCCTCGCAACTCACATCCATAACACCTGTGAACTGTAAGGAAGTCTGTGCTTCGGCCCGACTTTCCTGCCCCTTTTTATAAACATCAGTTGTCTTAAAAGTAGTCTTATTATAATCTAATA
>348 a8j._4327
CAGAGCTTCGAAGCCTAAGGAAAAGCAGCCGAAAGGTGAACTATCCTTAGGATTGAGATCTCCACCCTTTGTTTACATTACCTTTGTTGCTTTAGCAGGCCCGCTCTCGGGCCGCCGGCTTAGGCTGGCCAGTGCCTGCTAGAGGACCTAAAACTCTTGTTAATAATATTGTCTGAGTACTATATAATAGTTA
>349 a14igrp_25816
CAGTGTTCGCTGCCCTCACGGGTAGCAAACCTCACCCTTGTGTATTATATCTTTGTTGCTTTGGCACGCCGCCTTCGGGTACCGGCTTCGGCTGGCTCGCGCGTGCCAGAGAACCTAAAACTCTGAATGTTAGTGTCGTCTGAGTACTATCTAATAGTTA
>35 a5i_866
CAAATCTGGTTGTGGGTGGGGTTGGTGGGAGAGGGTTCTGCTTTGCGGCGGACGCTCTCACACGGCCCTGCCAAACATTTGCGCTTGCTGTGTTTGACAGAGTGACGGTTGGATAAGATATAAGAGA
>350 a4igrp_31100
GTGAATACAAACGCTTGGGTGTCTCTGCTTCGGCAAGCCCCTCGCACCCTTCACATCCATAACACCTGTGCACTGTAAGATGACTCTCTGGACTTCGGTCCTTTGGGTCGTCTGACCTTTTTTACAAACTATTATATGTAACAAATGTAGTCTTATTATAACAAAATA
>351 a8igrp_639
CAGAGTTGCAAAACTCCCAACCATTGTGAACTTACCTCACCGTTGCTTCGGCGGGTGGCCCTCTCCGGGGCCGCGCCGGCCCCACACGGGGCCGGCAACCCGTCAGAGGACATAAACTCTTAGTAACCACTGGCCTCTCTGAGTAACTTATACAATAAGTCA
>352 a8ogrp_5821
ACAAATCCAATGCTTGTGAGATGATTTTAATTAATTGTCTTGCAAATATTAATCCGCTGGCCTCGCAAGGGGCTGGTTGATAGATAACGATATAAATGTGTGTAGTGTTGACAGTGTGTGATATTTAATTAATTATTGA
>353 a4ogrp_7066
CAGAGTTCATGCCCTCACGGGTAGATCTCCCACCCTTGAATACTATACCTTAGTTGCTTTGGCAGGCCGTGGAAACACTACGGGCTCCGGCCTGTGCGTGCCTGCCAGAGGAAACAAACTCTGTTTTTAGTGATGTCTGAGTACTATATAATAGTTA
>354 a8l_2073
ATGATGCCCTCGAAGTCTTTGGATTGGTAGGGTTTGTGTCGGTCTCTTCGGAGTCGACCTTATCTCACACACCGTGAACTGTGGCTTCGGCCATTTACACAAACTGTTAGTAATGAATGTAAAATCATAACAAACATA
>355 a2i_1388
CCAGATGAGGGCTTCGGCCCCCGTCCCAACCCTTTGTTGACCGAAACCTTTTTTGCCTCGGGGGCAGAGCGTCCGCCGCCGCCCCCGGAGGACTATTCAACACTGCCTCTTTACGTCGGAGTCTTAATGAAAATAAATCA
>356 a20ogrp_8324
ACAAATCAGTTATATGGCGAAAGCCATATATATTCACCCTAAGCCTGGGATTGTACATTGTACAGGACCGGGCTTTGGTTGGGCTACATCCCTTGTGGATGTGGCTCCGGCAAGTACGCTTCGGCGCACTGGCCACATAGACGCTTGTATTGTTTGACAGAGTAATTATTGCTTAAAAATGA
>357 a9d_31426
TCGTACAATGGAGGTGCTGGGGTTGTCGCTGACCGTTTGAAAGGGTCGTGCACGCCCTCGGTGCTTTCACACATAATCCATCTCACCCCTTTTGTCGCAGTCACCGCGTGGGGGTCCCTTTTAGCTAGTTCTGAAGGGGGGCTTTCATGTTTTTTACAAACACACCCTTTTTAATGCAATATGTAGAATGTCTTACTTTTTGCGATCACACGCAATCAATA
>358 a14ogrp_14747
TTGAATCCTTAGGATGTCGCTGGCCTTTTTGAAAGAAAAGGCATGTGCACTCCGCCTTTCAATCCACCTGTGCACTTAATGTAGGAAAAGGGGTAACCCTAATTCTACGTATTTTTACACACACTATAAAGTAATAGAATGTATCTTAGTAGACCTTTAATGGTCGAAAACCTAAATA
>359 a2l_13545
ACGAATTTATTGGAGTTGTGCTGGTTCTTACAAGTGCACACTCCTTACAATTCCATTCACCCCTTGTGCACTCTAAGAGACGTATCTCCCCCGTTTACGTGCCTTTATTGGCTCGGGATTTCGTCTGTTTAACACACTCTTATTGTAATAGAATGTAATCTGGCTGAAAGGCCTAAAATTTAAATA
>36 a17igrp_3689
CCGAACTGTTGACACGAGTTGTTGCTGGTCCTCAAACAGGGGCATGTGCACGCTCTGTTTACACATCCACTCACACCTGTGCACCCTTCATAGTTCTGTGGCCTGGGGGCACTGTCCCCCCTGCTGTGGTCCTATGGATTTACACACACACACACTGTAATAAAGTCTCATGGAATGTATGCAGCGTTTAACGCAATACAATA
>360 a5j_3892
TGAATTATAATTATTTGTGAATTTACCACAACAAACATCAATCATACAATCAATAATTAAAAAATTA
>361 a16igrp_19015
CAGTGTTCCCTGCCCTCACGGGTAGAAACGCCCACCCTTGTATATTATATCTTTGTTGCTTCGGCAGGCCGCCTTCGGGCACCGGCTCCGGCTGGATCGTGCCTGCCAAAGGAAACCCAAACTCTGAATGTTAGTGTCGTCTGAGTACTATCTAATAGTTA
>362 a11igrp_11713
ATGAATACACTGGATGCTCTTTTTAGAGGTCCGACACTCATTTACCTTCACACTGTGCACACACTTCTTTTTCACCCATTTTAAACACTTTAGTATAAGAATGTACCAGTCTCTTAATTGAGCATAAATATATAATA
>363 a1igrp_5435
CAGAGTTCATGCCCCTAGGGGTAGACCTCCCACCCTGTGTTTTCGTTACTTTGTTGCTTTGGCGGGCCGCCAGGCTCCGGCCTGGCTACCGGCTCGCGCTGGTAAGCGCCCGCCAGAGGACCCTAAACTCTGAATATTAGTGTCGTCTGAGTACTATATAATAGTTA
>364 a16ogrp_8630
AAGAATTACGGGCTTTCGGGCCCTCTATTCTCACCCTTTGTTTACCACACTTTGTTGCCTTGGCGCCTAGCGCCAGCGGATCAAAACCCTTGAATCATTGCTGTCTGAGTACTATATAATAGTTA
>365 a14igrp_1207
GGGGAGATTGAGGGAGGATTGGAGAGAGAGTTGGGATGTGAGAGGACGACAGCATATGCATTTTAATTTTTAATATTACA
>366 a10igrp_19173
GTAAGCCCTCGTGGCATTATTATAATCAATACACCTGTGCATCGCCTTCGGGCTACAAACTTATTAGGTTTAGAATGTATTACAAAACTATAATA
>367 a5j_5064
CTGGGTCAAAGGGCGCTTCTGCGCCCGACACCAACCCTTCGTTTCCCGCCCGTCCTTTGGCGCTAAAGGGGGTCACCCGTAAGGGAGGCCTCTGCCAAACGTAACCCTGAACAACGGTGTAGCCTGAAGTAAAAAGCAAATAGTTA
>368 a11igrp_28550
AAGATTCGACCTTCGGGTCTATCTTCTCTTCAGCTGTGCGCTTTGGTCTGCACGCTGTTGAACTTCACACACCTGTGCACACTTCGGTTGTGGCTGGTTAACTCTGGTCGCTTCCGCTTTTACATTTAACTACCAAGTCTAGAATGTCAAATACAATAAAAATAA
>369 a4d_17596
AAAAAGATCACCGGTGTATCCCAGCGACGTCGTGTACTCGACCTTGTGGGGCTGTCTTAAACTCACAGCGTTGCCAGCCGCGCGGAATACTAATGCCCTAGCCTTCGGGCTAGGGGCCGAGTGAATCCCACCCGTGTCTACATACTCTTGTTGCTTTGGCGGGCCGTGGCCTCCACTGTGGGCTCTGCCTGCATGCGCCCGCCAGAGGACCCAACTCTGAATTTTAGTGATGTCTGAGTACTATATAATAGTTA
>37 a1ogrp_7291
CTGAACTGTCAACACGAGTTGTTGCTGGTCCTCGAAAGGGGACATGTGCACGCTCTGTTTACACATCCACTCACACCTGTGCACCCTCGTAGTTCTATGGCCTGGGGGCTCTGTCCCTCTCGCCGTGGTCCTACATCTTTACACACACACTGTAACAAAAGTATAATGGAATGTATGTCGCGTCTAACGCAATACAATA
>370 a4igrp_23564
CAAGTTCTGTAGGTTCTGTCGCTAAAGACATGACTCTATATACGCGTGTTGTGTTTGACAGAGTTATATGAGAGACAATTATAGA
>371 a4j_18849
GTGAATTAAACATGCTTGGTGTCTTCGCTTCGGCAAGGCCCTTGCTTAACTCACATCCCAACACCTGTGAACTGTAAGGCGCATGACTAGGTTCGCCCAAGTCATCGTCTGCCCTTTTTAACAAACAATTAATGTAACAAACGTAGTCTTATTATAACCTAATA
>372 a4j_2597
AAGATTCGGCCCTCGGGCCTAAACCTCTTCAGCTGTGCGCTTCGGCTGCACGCTGTTGAACCTCATACACCTGTGAACATTCCGGTTGTGAGTCACCTCACAGTGTCTCACTTCCGCCTTTACATCAAACCACAAGTCCAGAATGTAAAAACTATAAAGTAA
>373 a19ogrp_1777
CAGAGTTCGTGCCCTCACGGGTAGATCTCCCACCCTGTGTTATTATACCTTTGTTGCTTTGGCGGGCCGCCCTCGGCTACCGGCCCCGGCTGGTACGCGCCCGCCAGAGGACCCCAAACTCTGAATGTTAGTGTCGTCTGAGTACTATACAATAGTTA
>374 a1c_12889
GAGAACGCCGGCGCAAGCCGGTACTACACCACACACACCTGTGAACCGTCTGGAGTCAGCGAAGAGGCTTCGGCCCTAATAGCGTCCGCTTTACAAAACATCTAGAAATGTAACGAACGTAGTCTTATTTTAACAAATA
>375 a2b_4801
TTGATGCCCTTTGGGGTTTAATCATCCACACACACCTGTGAACCGTTTGGCCTTTCATTAGGCCATTCAACCATTTAAACTTTGTGTATGAATGTGTAATATTAAAACAAAACA
>376 a14ogrp_3995
CAAAATCGTTAGGGGAAGAAGAGCTAACTAGCAGCTATATGCGGTTGACGCTTTGGCGTTGACACGTTGGCTGGCTGGCGCTGGCTCTTTCTTTTGCTTACCATTTGCGCTTGTATTGTTTGACAGAGTAAATATATCATATACAAAGA
>377 a2l_978
AAGAATACCGGGCCCTCCGGGGCCCCATTCTAACCCTTTGCATACCTAACTTTGTTGCTTTGGCGGTAAAACGCCAGAGGACCGAAACCCTTGAATCTCTGCTGTCTGAGTACTATATAATAGTTA
>378 a20igrp_783
CCAGTCTCTGGTCCACCCATGCAAATGTACCTGTGCTTGCCTTCGGGCAATTTTAATCTCAATGACTTCTGAATGAAAAAATACA
>379 a14igrp_5482
CAGAGTTAGGGTCTTCCAGGCCCGACCTCCCAACCCTATGTTTACTCAACCTTTGTTGCTTCGGCGGACCCGTCTCCACGGCCGCCGGAGGGCCGTCACACGCCCTCTGGCCAGCGTCCGCCGATGGCCTACACACAAAACTCTGAACAAATCGTGTCGTGTCTGAGTATTACAAAAATTAAGCA
>38 a2igrp_9397
CAGAGAATATCGCCCTCACGGGTGACTCTCCAACCCTATGTTATCATACCTTTGTTGCTTTGGCGAGCCGCCTCGGCCACCGGCTTCTGCTGGTGAGTGCTCGCCAGAGGACCCAAACTCTTGAATTTATGATTGTCTGAGTACTATATAATAGTTA
>380 a6igrp_2352
CAAATCTTTTGCGAGTGCTGCGCTTGCGTAGCCTCACAACATTAGCACAAGGTCGCAAGGCCTTGATGTTTACGCTTGTTTGTTTGACAGAGTTAGTTGAGACAATAATAAAGA
>381 a1igrp_253
ATGTAACCGGACTGTTCGGGTGCCGTAAAACGCATCTGTTCGGAAAGGGAGATATCATACACCCTATGTTTATTTACTTTTGTTGCTTTGGCGGGCCGTCCTTTTAGGCATCGGCCCTGGCTGATCGTGCCCGCCAGAGGACCTAAACTCTTCTATCAGTGATGTCTGAGTACTATATAATAGTTA
>382 a3ogrp_8169
ACAAATCCTGCTGCAGTGCCCTTGGGTGCTGTAGTATATTAACTCGGTCCGGGTCGCGAGATCCGGGCTGATAAATTAATGTGTGTGTTATGTTGACAATGTGTGTGTGATTAATTAGTAGA
>383 a12igrp_14142
CAGAGTTGTTGACACGAGTTGTTGCTGGTCCTCAAATGGGGGCATGTGCACGCTCTGTTCACACATCCACTCACACCTGTGCACCCTCTGTAGTTCTATGGTCTGGGGGACACACTGTCTTCCTCCCGTGGTTCTACGTTTTTACACATACACCGTAGCAAAGTCTTATGGAATGTACTCTGCGTTTAACGCAAAATAATA
>384 a19igrp_2645
AAGAATTGCCCTGTTTTTTCGAAAATGGGATCTATTCCAAACCGTGTATACATACCTTTGTTGCTTTGGCGGGCCGCCGTCTCGGCGTTGGCTCCGGCTGACTGTGCCCGCCAGAGGACCACAACTCTTCTGTTTAGTGATGTCTGAGTACTATATAATAGTTA
>385 a2ogrp_8396
GCGAGGTTTTTGGGTCTTCGGGCCTGATACCCGTCCATGTCATTTGCACCGATTTGCTTCGGCGGAGGGTTGTCGGGAGAGGTTCATGGCGGCCTCACGGTCACGTGACTTCCCTCGGCGGCCGCCGTCGGCCCTTTTTAACACTTGCGGATTTTTGAAGTCTGATTGTCAAAACGAAAACAAGCA
>386 a4ogrp_4220
CTGCTTGCTCATGGCCGTCCTCGGGGGCAACCCCTTGGGCGGTACGGCAACAACACCCTTGTCTATGTATACCTTTTGTTATTTCCCTCGGCGGGGTCACCCGCCGCTGGGGACACCAAACCCTCTTGCATGAAGCATCAAACCTTCTGAACAAACCTAAATTATTA
>387 a12igrp_20720
ATAATAAGTGTTTTATGGCACTTTTTTAAATCCATATCCACCTTGTGTGCAATGTCAGGGTTGGTTTCTCTCTTTTGAGAGATCAACCCCAAACATCAACTCTATCTTAACTCTTTGTCTGAAAAATATTATGAATAAAACAATTCAAAATA
>388 a13igrp_6495
GTGATTTGACCTCCGGGTCTATATTACAATCCACATACCTCTGTGAACCGTTTGACCTTCGGGTCTACATACAAACATCAGTGTAATGAACGTCAAATTATATAACATAATA
>389 a2b_16151
CAAATCTTTGCGGGTGCTGCGTGCATGTATTTGTGCGTAGCATCTTGCACATTAGCACAAGGTCGCAAGACCTTGATGTTTACGCTTGTTTGTTTGACAGAGTTAGTTGAGACTAAATAAAGA
>39 a1igrp_10744
ACGTATCTCTGACGGCGGAGGCGCGCCCTGCTCCGGACCGAAAGGCCGTGCAGCGGGTGCGCCCGAGTCGCTCAACCCTTTCGAACCCACCGTGCACTCTTGTCGGCGAGGGGCCCAGCGCCCCGAGCCGGATCACAAACACCTTTAAAAACAGAATGACCAGCGCACATGTGTGTCGCCTAAACTTAAA
>390 a1c_15318
CAAATACTTTAGGAGTAGCGTGTGTTTAGCCCGTTTACGGTGCCGCCTAGTGACTCTAACATTAGCACAGGGTCGTCTAAGACTCGTGGA
>391 a15igrp_446
GAGAACACGCGGCGCAAGCCGTCTCTACCACACACACTGTGAACCGTTGGGCTTCGGCCCTCTTTTACAAACCCTGTGTATGAATGTATATATCATAAACAAAGCA
>392 a9f_25718
CTGAGTTACCGCTCTACAACCCTTTGTGAACATACCTAACCGTTGCTTCGGCGGGCAGGGGAAGCCTCTCGCGGGCGACCCCTCCCGGCGCCGGCCCCATCACGGGGGCGGAGCGCCCGCCGGAGGAAATCAAACTCTATTTACACGACGTCTCTTCTGAGTGGCACAAGCAAATAATTA
>393 a2ogrp_6015
CAAGTTTTGTGAAGGCCGGCAGCGGGGGGAGAGTGTGATGTGGTGTGTAATTCAAACTTCCAGTTTGTCTTACGCACTATGACTCACACACCCCACAGCTGCTGTGCCCGATACATCCACGCGTGTTGTGTTTGACAGAGTTATATGTGACCATAAATTGTA
>394 a14igrp_20581
AAGAGATTTGCCCTTCGGGGTATTATCCCACCCTTTGTTTATATTACTTTGTTGCTTTGGCGGGCCCGTCTCCGGACCACTGGCATATGCTAGTCTGCGCCTGCCAGAGGACCACAAAACTCTTTAATCTATGTCGTCTGAGTACTATATAATAGTTA
>395 a19ogrp_6184
CCGAGTTTTCAACTCACCAACCCATTGTGAACTTATTCTTGCTTCGGCGGGGGGCCTCGCGCCCGCCGCCGGGGGACCCAAAACTCTGTTTCTACGAATCTCTGAGTAAAAAACAAATAAATCA
>396 a1ogrp_6377
CTGAGGTTCCGAGCCGAGAGGCCGGGCACCCGCCCATTGTCATATGCACCCAGATGTTTCGGCGGAGGGTGGTGTCACGTGCCGGCAGACGTCCGAGAGGGCGGTCTGTGAGGACGTGAGGCCGCCGCCGTCGGTGTCCCAATCCGATGCGAAATGGATGAAGTCAGATGCGAAAAGCGAAAATAGAAAACA
>397 a8ogrp_20646
CAAATCTTTGCGAGTGCTGCGTGCGTAACTGTGCGCAGCATTTCACAACATTAGCACAAGGTCGCAAGGCCTTGATGTTTACGCTTGTATGTTTGACAGAGTTAGTTGAGAATAAATAAAGA
>398 a4i_1339
ATGAATTTGGACCTCTGTGTCCTTAATCTAATCCTTCAAACACCTGTGAACTGTTTGGCCCTCGGGCCGATTTTAACAAACATCAGTGTAATGAACGTAAAACATATAATCAATTA
>399 a9l_21346
CCGAGCGAGAATTCTCTGAATTCAACCTCCCACCCGTGTTTATTGTACCTTGTTGCTTCGGCGGGCCCGCCTCACGGCCGCCGGGGGGCTTCTGCCCCCGGGCCCGCGCCCGCCGAAGACACCTTGAACTCTGTATGAAAATTGCAGTCTGAGTCTAAATATAAATTATTTA
>4 a14igrp_990
ATGAAATGTTTGTCGAGAAGGGTTGTAGCTGGCCTCCAGGGGCATGTGCACGCCCTGATCGCATCCACCTCCCACACCTGTGCACCGCCTGTAGCTTGGGATGATCACGGAGCCCTGATGGGGCGACGAATGCCTTTGTCTATGAATATTTTCACACACGCTCAAAGTATGACAGAATGTACATCGTATCGCGTCTGATAAACGTGACAAATA
>40 a3ogrp_5596
CTGAACTGTTGACACGAGTTGTTGCTGGTCCTTGAAAGGGGACATGTGCACGCTCTGTTTACACATCCACTCACACCTGTGCACCCTCTGTAGTTCTGTGGCCTTGGGGACTCTGTCCTCTTGCTGCGGTCCTACGTCTTTACACACACACACACCGTAATACAGTCTCATGGAATGCAGTCGCGTTTAACGCAATACAATA
>400 a1a_27350
CTGGGTAATCGAGCGCTCCGGCGCTCATCCCCACCCTTTTGTGTCACGCAAGCCATTCGGCGTCCAGGCGGTACCCCCGTTGAATCGGGGGGCCTCCGGCCGAACATCAAACCCTGAAGCAACTTTGCAGCCTGAAGTAAAAGCAAATAGTTA
>401 a4a_8275
TCGTAAAACTGAGACGCGAGGGCTGTCGCTGACTTTTCGTCGTGCACGCCCAAGTGCTCTCAAACAATCCATCTCACCCTGTGCACCACCGCGTGGGTCCCCCTTCTGGCTCGTCCAGAAGGGAGGCTTGCGTTTTCACACAAACTCGATACAGTGTAGAATGTCTCCTGCGATAACACGCAATTAATA
>402 a9igrp_17193
ACGAATATCTATGGCGTTGGTTGTAGCTGGCTCCTAGGAGCATTGTGCACGCCCGTCATTCATATCATCTTTCCACCTGTGAACCATGTGTAGGCCTGGATACCCCTCGCTTTGGCAACAAAGCGGATGCAAGGATTGCTGCGTCGACAAGGCCGGCTCTCTTTGAATTTCCAGGTTCTATGTCTTTTACACACCCCATTTGAATGATTTAGAATGTAGTCAATGGGCTTTCATGCCTATAAAAAACTATA
>403 a9c_2085
CCAAAACTTAGCTGTCTGGTCGAAAGGCCGTGACGCTTCAACCCTTTGTGAACCAAAAAACCTTTCGCTTCGGCAGCAGATCCGGTTGGAAACAGCCGGGGCGTTAGCCTGCCGCTAGCACCAACATAAAAAACTTGCAGTCAAAACATTGTCTGATAACCAAATTTTCGAATGAAAATTA
>404 a15ogrp_14583
GAAGATATATTCATCTAAACCATCGCGAACGTTACCCTATAACCGTTGCCTCGGCGGGCACCCCCCGCCGGCGGCACAACAAACTCTTTTTATTATAGGCATCTCTGAGTACTTACAAAAATAAGTTA
>405 a3igrp_7818
CTGGGTAAAGGCCTCGCGCCTCCAACCCCACCCTTTGCAACCGCGGCCCGGATTCGGCGCTCGGCGGGAGACCCTCTGCTCGCGGAGGCCTCTCGCCTGCCGGAATCAGCCAACCCTACCTAGAAAATTGAAGTCTGAGAACAAGTTAAATTAAACA
>406 a9ogrp_10346
TCGAGTCCTGGGGATTGTGCTGGCTTCGGCAAGTGCACGTCTCTCACCACTTTAAACTACACTTGTGAACCTTGGAGGTGCGTCCCCCGTGCGGGTGGGCGTTGCCTATTTTACTTGCACACTTTGTATCTATCGGAATGTAAATGGGTTTTATGCAAACCTAAATAAATA
>407 a9c_28395
CCGAGTGTTACAACTCCCAAACCCTTTGTGAACCTTACCATCGTTGCTTCGGCGGGACCGCCCCGGCGCCTCTGCGCGCCGGAACCAGGCGCCCGCCGGGGGCCCGAAACTCTTGCTTTCACACGCGGAATTCCTCTGAGTGGCACAAGCAAAAAATGAATCA
>408 a4d_412
TTGATTTTGTGCGCAAGCACATTACACACCCCGTGAACTGCCTTTGGGCTACACACATCATGTTATGAATGTAATACTATAATAATAAAA
>409 a3igrp_11262
CGTATTTTAGGCCGGTCTGACCGGTTCTATTCAACCCTGTTTTTTGCGTACTCATTGTTTCCTCGGCAGGCTTGCCTGCCAGTAGGACATTTCAACTCTTTTATTAGCAATCAGCGTCAAAATAAATACAATCGTAA
>41 a8i_1735
GTGGACGCCCTCACGGGCTTATAACTATTCCAAACCTCTGTGAACCGTGCCCTTCGGGGCTATTTTACAAACATGGTGTAATGAACGTCATATATCATAACAAAACA
>410 a5ogrp_3294
ACAAATACAGGGCCGGCCAAAAGCCGGTTTCTAAACACCTGTGCACCGTGAATTGTCTCTGGTGGATTCCGTCCACCGACCACGAACCCTGACATACCTACGTCTTAAATAATTGTTTAACAAAAA
>411 a6ogrp_19519
ATAATAAAGTGTTTTATGGCACTTTTTAAAAAATCCATATCCACCTTGTGTGCAATGTTAAGGTCTCATCAGTCAAGTAACATTTTCTGATGGGATTTTTTATACATCAACTCATTCTTGAACTAATTTGTCTGAAAAATATTATGAATACTTAATTCAAAATA
>412 a5i_6405
TCGTGGGGATTCGTCCCCTTTAGATAGACACCCTTTGTTTATGAGTACCAATTGTTTCCTCGGCGGGCTTGCCCGCCGTTGGACATAATCAAAACCTTTGTAGTAGTAGTATCTTCAGTAAAAAATATTA
>413 a6ogrp_15741
CAGAGTTGCAAGACTCCCTAAACCATCGTGAACGCTACCCAAACCGTTGCTTCGGCGGGCGGCGCCCCTGCGCGCCCCCGGGCCCCACCGCGGGCGCCCGCCGGAGGTCACCGAACTCCTGATAATTTATGGCCTCTCTGAGTATTCTTTACTGAATAAGTCA
>414 a9igrp_23377
CATTTTAGCAGCCGCAAGGCAGCAACCGCCCACCGCGAGGTGGGGTCGGCACCCTCTGTCTACTTGTACCTCTTGTTGTTTCCTCGGCAGGCTTGCCTGCCGCAAGGAACCCCTTAAACTCTTGTATCTAAAGCATTACAAAACTCTGATAACTACTTAATTATCA
>415 a3igrp_236
ACAAAACGTATGTTTGCCTTTGTGAATCGGGCGGCCGGCAGCAAGCTGGCTGCTCTCTATGCTTTCAGTCTAAATCTATACAAATTATAA
>416 a15igrp_2764
CAGAGTTCATGCCCTCACGGGTAGATCTCCCACCCTTGAATAATATACCTTTGTTGCTTTGGCGGGCCGCTTCGGCTACTGGCTTCGGCTGGTGAGTGCCCGCCAGAGGACCCAAAACTCTGAATTATAGTGTCGTCTGAGTACTATATAATAGTTA
>417 a19ogrp_1750
GAGAGACTTTGCCCTTTGGGTATATCTCCCACCCTGATTATTTTACCTGGTTGCTTTGGCAAGTAATGCCATATTGCAGGTCTTGCCAGAGTGTATACATACTCTTGTTTTCATGTAGTCTGAGAAAATCAAAATATTTA
>418 a4c_5071
AAGAGTAACGGGGGCTTCGGCCTACCAACTCCACCCTTTGTTTACAATACCATTGTTGCTTTGGCAGGCCCGTCGTAAGACGACCGGCTTCGGCTGGCCAGCGTCTGCCAGAGGACCTAAAACTCTGTTAAACATATTGTCTGAGTACTATATAATAGTTA
>419 a5i_12550
CAGAGTTCATGCCCTTCGGGGTAGACCTCCCACCCTTTGTATACATACCATTGTTGCTTCGGCGGGCACTCGCGTGGTTGGCTTCGGCCGCCGCGCGCCCGCCAAAGGACCCCTAACTCTGATATACTGTGTCGTCTGAGTACTATATAATAGTTA
>42 a20igrp_6665
CCGAACCGTCGACACGAGTTGTTGCTGGTCCTCGAAAGGGGGCACGTGCACACTCTGTTTACACATCCACTCACACCTGTGCACTCTCTGTAGTTCTATGGCCTTGGGGACTCTGTCCTCTTGCTGTGGTCCTACATCTTTACACACACACTGTAATAAAGTTCATGGAATGTATGTCGCGTTTAACGCAATACAATA
>420 a16ogrp_24961
ATAATAAGTGTTTTATGGCTACTTTTTAAATCCATATCCACCTTGTGTGCAATGTCAGTCGATCTTCTTCATGGAGATCGAACCAAACATCAACCTTTTATTTTTTAACTCTTTGTCTAGAAAAATATTATGAATAAACAATTCAAAATA
>421 a10igrp_5640
TAGAGAACTTGCCCTTCGGGGTAGATCTCCCACCCTTTGTTTACATTACCTTTGTTGCTTTGACAGGCCCGCCTCTTGAGGCCGCCGGCTCCGGCTGGTCAGTGCTTGTCAGAGGATTTAAAACTCTTGTTTAATTGTCGTCTGAGTACTATATAATAGTTA
>422 a1igrp_20565
CAGAAAGTAAACGCGGATCAAACCGCGAACTTCTAAACCTTTGACGATTGACTCATGTTGCCTCGGCGGGTTCTCCCGCCAGAGGATACATCAAAACTCCTGTTTTAACGGTGTTGTCTGAGCTACAAGCAACGAATCA
>423 a8j._6128
CAGAGTATCTTACTCACTAAACCATTGTTTATCTACCTACATTGGCTTCTCCGGCAGGAGGTTCCAGGGCGGGACCAAGCCTAACAGCACCTGCCGAAGGGGCAACCCACTGCTCTATACTGTACTGTCTGAGTAACAAAAAACAAATATCA
>424 a11ogrp_10824
CCGAAGTACAGGCCCTCTCGTAGGGCTAAACTTCCACCCTTTGTTTACCATTCTCTGTTGCTTTGGCGAGACGTCTTCGGACCACCGGCTCTCGGGCTGGTGCGCGCTCGCCAGAGGAAAATCAAACCCAAACCATTTTTAGTGTCGTCTGATAAACAAGTTTAAATTATTA
>425 a5k_7637
CAGAGTTGCAAAACTCCCTAAACCATCGCGAACGTTACCCCAAACCGTTGCTTCGGCGGGCGGCCGCGGGCTCACCCCCGCGGCCCCCGGGCCCCCTCCAGGGCGCCCGCCGGAGGCTCCAACTCTTGAATTTATGGCCTCTCTGAGTCTTCTGTACTGAATAAGTCA
>426 a2b_13004
CCGAGCTCATGCCCTTCCGGGTAGATCTCCCACCCTGTGTTATTATTACCTTTGTTGCTTTGGCGGGCCGCCAGGCTCCGGTCAGGCTATCGGCTTCGGCTGGTAAGCGCCCGCCAGAGGACCCCATATCCTGATTATTAGTGTCGTCTGAGTACTATATAATAGTTA
>427 a4ogrp_531
GTGTGGAGGGTTTGAGTGAGAGTTGGGATGGACGGATTAGAATCAATTTATTTTATTTACTAATCACACA
>428 a14ogrp_815
ACAAATCCCGTTGGACGTTGCGTCTGACACACGTGCCTCTGCTGTTGCGACAGCAGATGACATTCATCTTTCGACTGATCATTAGCAACGCAAAA
>429 a15igrp_6226
GTGAATTTTGGGCGTCTCTTCCACAGAGAGCCCGTCTTCCACTCTTACACCCTGTGCACCTGTTCGTCGGTGTGCTGCTTAACCGCGGCGCCCGATCAGTTTTACAAAAGTACTTCGACGGCTACCCAGCCCGAGAGGCGCTTTAACCAAACGCAAGTCAATGAATGTAAAAAGTTTATAACAAAATA
>43 a20igrp_1176
CAGAGTTCATGCCCTTCGGGGTAGATCTCCCACCCTTGTGTATTTATACCTTTGTTGCCTTGGCAGGCCGCTAGGCTCAGGCCTGGCTACTGGCTCCGGCTAGTAAGTGCCTGCCAGAGGAAATCAAACTCTGAATATTAATGTCGTCTGAGTACTATATAATAGTTA
>430 a1i_25018
CAAAATGTCTGGGATGTCCACTTTGGACCCCCCAAGCAAAACACATCCATGTGTACTCTCCCATGTTGCTTCCCTAGACCAGTGGCCACTGCTGCCAGCCCAGTCCATAATCGGTTCCTGGGTTGAGGTGTCTGGGGAAGGGCTCAATATTAAACTTTTAAACCAATTTTAGTTGTCTGAGTAGGCCATCCGCCGCAATTTTTAAAATATATTA
>431 a19ogrp_20241
ATGATTCTTTAACCTGGGAAGTAGGAGGCTTGCCTCTCTTTCCGCAAGGTGTGGCTCCGCACCTTTTAAATCTAAACTTGGGCTACCATTTTACACACGGTTGCATCTGCTGGGCTGTCTTCGGGCGCTCAGCAATACACACACACACGCTGATCTATAGGATTTGTATGGTTTTATGATAACGACTGGTAATGCGGTCGTATAACATTAATAAA
>432 a19ogrp_11711
CAGAGTTGTCGACACGAGTTGTTGCTGGTCCTCAAACAGGGGCATGTGCACGCTCTGTTCACACATCCACTCACACCTGTGCACCCTCTGTAGTTCTATGGTCTGGGGGACCTGCCGTCTTCCTGCTGTGGTTCTATGTCTTTACACATACGCCGTAGCGAAGTCTTATGGAATGCACTCTGCGTTTAACGCGATATAATA
>433 a8ogrp_1452
CAGAGTACTATAACTCACCAAACCATTGTATATTTACCTATATTGGCTTCTCCGGCAGGCGGTTCCAGGGCGGGACCGAGCCTCACAGCACCTGCCGAAGGGGCACCCACTGCTCTACACGTATTGTCTGAGTACCAAACAAATTATCA
>434 a6ogrp_2727
CTGAATTAAAGAGAGTTGATGCTGGCAGTCTGACTGCATGTGCTCATTCTCCTAATCCACTTACACCTGTGCACTTAATTTCGAAGGGAGGGTAAAACCTGCCTTTGAAACTCACAAACTCTTATTAAAATAACGAATGTTTATCTGCCGCAAGGCAAAATCAAATA
>435 a5k_19750
ATGATTGACCGAAAGGTCTTATCTTATCATCCCTCACCTCTGTGAACCGTTTGACCTCCGGGTCTGACAAAACAATACAAACATCAGTGTAACGAACGTCTTGTTATCATAACAAAAATA
>436 a1l._1414
CAGAGTTGCAAAACTCCCAACCCTTTGTGAACGAACCTACCAGTTGCCTCGGCGGCGAGCCTTTCAGGCGGACCGCCGGAGGAATACAAACTCTTTGCATTTTAGCATCTCTGATTACTTATTCAATAAGTTA
>437 a14igrp_8481
TCGAATGAAATCAGAGTCGGTTGTCGCTGGCCTCTTCACTGAGGCATGTGCACGCCTTCTCTATTCATCCACACACACCTGTGCACTTGTGAGACGGATTGACCCTCTCGGGGGACGGTCCGTCTATTTATACATAAACTCCATTATAATAAATTTGAATGTAATTTGATGTAACACATCTTTAAAC
>438 a3ogrp_3793
CAAAATCTGTTGGGTGGTAAGGGGGGAATTGGTGTAATAACCGATCCTCAACTCTACCCCTTTTACATTTGCGCTTGTATTGTTTGACAGAGTAAATCTACCCCATAATTATGA
>439 a11igrp_8770
ATGAATTTACTTAGGGAGTTGAAGCTGGCAGTCCGCTGCATGTGCTCGCTTCCGAAATTCTTATCCCATACACCTGTGCACATCTGAAGGTTTGAGTGTCAACTCGCCTTCTTCTTACAAACTCTATCTAAATAATCGAACGTGATTGTGCCGAAAGGCCATTAATCTATA
>44 a2ogrp_2312
ACAAGTCTGTCAGGGTTATAACTGGCACATTAGTGCTGCGTGCTCTGGCGCGTGGATCATACATTCTTTGCGACTGATTGTTTGCAAACTACAA
>440 a4a_1227
CATTCAGTAGCCTAGCTACTTGTTTATACCCTTGTTTTTGCGTACCTATTGTTTCCTCGGCGGGCTTGCTCGCCGGTTGGACAAAACTATAACCTTTTTAAATCTTCAATCAGCGTCTGAATTATTTATAATAATTA
>441 a2j_13282
CCGAGTTATACAACTCCCAAACCCACTGTGAACCTTACCAAATCGTTGCTTCGGCGGGACTGCCCCGAGCCCTCGCGGCCCGGACCCAGGCGCCCGCCGGAGGCCAAAAACTCTCCTGTTTTCTCTTAGCGGAATTTATCTGAGTGGCCCTTAGGGGCAAGCAAATGAATCA
>442 a15ogrp_405
TTGGATACCATCCTTCAACCTGTGTCTAGTTTTCTATACTACTACCACTATATAACTATATAAAAATCATTA
>443 a7ogrp_17380
CCGAGTACTTAACTCATAACCCTTTGTGAACCTTTATACCTGTTGCTTCGGCGGCGCGCCTCTCGGGGCGTGCCCGCCGGCATAATCAGAATCTCTGTTCGAACCCGACGATACATCTGAGTGTTCTAAGCGAACTGTTA
>444 a20ogrp_820
CAAGAAGCCGAAAGGCTACTTACAACCATTGCGAACTCGTCCAAGTTGCTTCGGCGGCGCGGAGCCCCTCGCCGGGCGCCGCAGCGCGCCCTCTCCGGAGGGCGGGTAACCGCCGGAGGTACAAAACTCTCTATATTATAGTACATCTCTGATTAAACAAGCAAATAAGTTA
>445 a1igrp_10152
CAAATCTTTGCGAATGCTGCCTGCAGCAATGCTTGCAGTATTTCACATTAGCACAGGGCCGCAAGGCTCTGATGTTTACGCTTGTTTGTTTGACAGAGTTAGTTGAGACAAAAATAAAGA
>446 a1igrp_25241
GTGATTTGGCCGAGAGGCCTTATAACATATCCTCACACCTGTGAACTCGTGTCCCGTGGGCCACCCGTGGTCCTGGGAACCCTTTACAAACATATGTGTAATGAACGTCATAATATCATAACAAAAACA
>447 a5i_2979
TTGATGTGGTCTGGTTCTCCAGATCCACTGAGATAGAACCCCCTGTTTTTCGAGTACCAACTGTTTCCTCGGCGGGTCCGCCCGCCAACGGGGACAACCACAAAACCTTTGCAGTGGCAGTAAACGTCTAAAAACAAACAAAATCA
>448 a18igrp_18571
AAGAGTCATTATGGGATAAAACCCTAATACTCCACCCTTTGTTTACATTACCTTTGTTGCTTTGGCAGGCCCGTCTTCGGACCACCGGCTTTGGCTGGTCAGTGCCTGCCAGAGGACCTAAAACTCATGTTTAAATTATTGTCTGAGTACTATATAATAGTTA
>449 a120grp_2963
TCGAGTTTACAACTCCCAAACCCTTATGTGAACATACCTACTGTTGCTTCGGCGGACTCGCCCCGGCGTCCGGACGGCCTCGCGCCGCCCGCGGCCCGGACCCAGGCGGCCGCCGGAGACCTCTAAACTCTGTATTATCAGCATTTTCTGAATCCGCCGCAAGGCAAAACAAATGAATCA
>45 a8i_1773
CAAATCTTTGCGAGTCTGCGTGCTTAACGGTACGCAGTTCTCACACATTAGCACAGGGCCGCAAGGTTCTGATGTTTACGCTTGTATGTTTGACAGAGTTAGTTGAGAATAAATAAAGA
>450 a20ogrp_17505
CCGAGAGAGGGCGCCTCGTGCGTCCGACCTCCCAACCCTTTGTCGACCGCACCGTGTTGCCTCGGGGTCGCCCGCTCCGGCGGGCGCCCCGGACGGCCCCAACCAAAACTCTGCGTCCTTGCGTCGGAGTCGAATGATAAATCAATCA
>451 a14ogrp_10947
CTGAATTGTCAACAAGAGTTGTTGCTGGTCCTCGAATGGGGGACATGTGCACACTCTGTTCACACATCCACTCACACCCTGTGCACCCTCCGTGGTTCTGTGGTCAGGGGGCCTGTCCTCCTGCTGTGGTTCTGCGTCTTTACACACACACTGTAACAAAGTCTCATGGAATGCATGCCGCGTTTAACGCAATACAATA
>452 a9f_6771
CTGAACCGTCGACACGAGTTGTTGCTGGTCCTCAAACGGGGGCATGTGCACGCTCTGTTTACACATCCACTCACACCTGTGCACCCTCCGTAGTTCTATGGCTTGGGGGACTCTGTCCACCCGCTGTGGTTCTATGTCTTTACACACGCTCTGTAATAAAGTCTCATGGAATGCATGCCGCGTTTAACGCAATACAATA
>453 a9igrp_890
CAGAGTTGCAAAACTCCCAAACCACTGTGAACATACCTGAAACCGTTGCCTCGGCAGGTGGCCCCAGGGCGGGGCCGCAGCCTCCTTGCGGAGGTGCCTGCCGCAGGTTACACAACTCTATATATTTAGTGGCCCTTCTGAGTATACTTTTGAGCAATTA
>454 a8ogrp_2211
CCGTTGGAGTCCGCTCCATCTGGGATAGAACCCTTGAATTTGAGTACCTTTTCGTTTCCTCGGTGGGCTCGCCCGCCGGTGGACAACCTAAACTCTTTGTAATAGCAGTATCTTCTGAGAAAAACAAATAGTTA
>455 a7igrp_24338
CCATTCAAAAAACTTAGACCCACGGGGTATGCTCTCCAATAGGACAGTCAGTAGATGTACGGTTCTGCTGGCTGGCAGTCGAACGGAAGGCAGTGTCCATTTATGGTCCTGTCTTGGCTAGTAAGCTGATCGAGCTGCCTGTCTGACCCTACCCTTGCTTTTTGCGCACCCATTGTTTCCTCGGCAGGCTTGCCTGCCAGTAGGACCCCCTTTAAACCTTTGTAATTGCAATCAGCGTCAGAAACAACGTAATCGTTA
>456 a16ogrp_8144
CCGAGTTTAAGGAATTCTTTTGAATTTCTACTCCCATCCTTGTTTATTATGAGCTGTAAAGCAGCTTCGGTGGGCCATCTTTGATAGAAGATGTCGGCTCTTAAAACCAGCTGGCTTGTGCCTGCCGAAGTAACCAATTCTGATAATTGTATTGTCTGAGAATAAAAGATTAAATAATCA
>457 a11ogrp_5367
CTGCTTGCTTATGGCCGCTGAGGGGGGAAACCCCCTCGGCGGTACGGCAACACCCACCCTTGACTATATATACCTTTCGTTATTTCCCTCGGCGGGGCAACCCGCCGCTGGGGACATCAAAACCCTCTTGTATCAAGCATCAAAACTTCTGAAACAAACCTAAAATATAA
>458 a9l_19212
TCGAAAAAAGTGATCTAGGGGAAGGGCGAGCGAGGCGAAGTTTGGTAGATCGTAGGGATTGTCGCTGGCCTTTGGAAACGAAGGCATGTGCACGTTCCGAGTTCTCCTTAGTCCCTCGTTTTCGTCTTTCCTTTGGAAAACCTTCATTCACACCTGTGCACCTATTGTAGGTCCCGAGAGGGGATCTATGTTTTCTTCTACCCCAAAAGTCCAGAATGTCATTAATACGTCGACCGGCCTGGCTAGCGCCTCGTTGGCGACGGTAAAGAATCATATA
>459 a4j_18365
CAGAGAACTGGCCTCCGGGCCAATCTCCCACCCTATGTTTACATACTTTGTTGCTTTGGCAGGCCCGCCTTTGGGCCGCCGGCTTCGGCTGGTCAGCGCCTGCCAGAGGATTTCAAACTCTTTATATCAGTATTTGTCTGAGAACTATCTAATAGTTA
>46 a8j._493
GTGAACTTGGCCTCACGGCCTAACCCACAATCCACAAACACCTGTGAACCGTCGGCGCTCGCGCCGCTTTTACAAAACATCTGTGTCATGAACGTCCATTGATTGTAAACAAACA
>460 a4l_19292
CCGAGTTCGTGCCCTTCGGGGTAGACCTCCCACCCTGTGTTATCACTACCTTTGTTGCTTTGGCGGGCCGTCAGGCCTCGGCCTGGCTACCGGCTTCCGCTGGTACGCGCCCGCCAGAGGACCCAAACCCTAAATATTAGTGTCGTCTGAGTACTATATAATAGTTA
>461 a15ogrp_2407
CTGGGACCCAGGTTGGGCGCTTTCGGCGCCCGCCCCCACCCTTTCGTCCTAGCCTCCTAGACAACACAAACCCGTACCGGCCTTAGGCGCGCCCGCCTTGACAGCGCGGTGCGCCGGCCGGACATCAAACCCTACGAACAACATTGCAGCCTGAAGTTAAAAGACAAATAGTTA
>462 a4a_13014
CCGAGTTTTCAACTCCCAAACCCTTTTGTGAACCTACCTATCGTTGCTTCGGCGGACTCGCCCCAGCCCGGACGCGGACTGGACCAGCGGCCGCCGGGGACCCTCAAACTCTTGTATTACCAGCATGTTCTGAATACGCCGCAAGGCAAAACAAAATTA
>463 a6igrp_330
GTGAAAGGTCGGGGCTCGTCCCCGACGTAACAAAACAAACCTCTTGTGAACCTGGCCCTCGGGCCGATACAAACATCATTGTCTGGACGTCATCTATGATAACAAATAATA
>464 a2i_3078
CTGTTTGCTTGCTACGCCGCCCGGGTTTCACCCGGGCGGCGCCCAGCTCGCCACCCGTGCCTATCTACACCTACCGTTACTTCCCTCGGCGGGGCAACCCGCCGCTGGAAACACACCACACACCGTGCATCAGCGTCACCCCTTCAGACGACATATGACAGCTA
>465 a20ogrp_5503
ACAAATCATGTTGTGCGCCGAGAGGCGTGCAAAACATAAACCCGAACCTGTGCCATTACTGGCCAGGCTAGGTGTGGGTCGCAAGACCTGCGGAGAAGACAAAGACCCTTCATGGGTAAGAGTCGGATCCACATAGACGCTTGTTTTGTTTGACAGATTTCAATTGTATCCAAAATTAATGA
>466 a2k_1049
CAAGGGATCGTGGTAGAGGGTGAGGGTTTGTTGGAATGTAGAGAGACAACAAAGACAGATAAAGATACAACGATATATTATGACTTGCCGCCTTGGATCTCTGGGCTCTTGTGTCGATGAAGAACGCAGCAAAGCGCGAAACGTGTCATGACGTGCCGTCTTGCGAATGACGACTCTTTGAACGCACCCTGTACAAGTGTATATTCCCTCGAGCGCGCACACTGCTTGCAGATGGCCGCAGCGAGAACGCGCGGGCGAAAAGGATGTGTGCGGTGAGTGAGCGGTGTCCTGGAAGAAACGTTAGGACGCCGTGCACAAACCCCCACACTTAATCCATTGTGCATCGGGGGAATAAGAAGACCCGCTGAACTTAAGCATATCAATAAGCGGAGG
>467 a4c_4753
GTGAATAACAGGACGTCCAATTTAACTTGGAGTCCGAACTCTCACTTTCTAACCCTGTGCATTTGTTTTGGTTAGTAGAATGCTTGCGTTCGAACACCTCTTCATTTTACAAACACTAAGTCAAAGAATGTTTAAATTTTATAACAAAACA
>468 a11igrp_1881
ACGAATGCGAGTCGGTCGACCGTGCTGGCGGAAACGCACGTGCACGTCGGTCGCAAACCATCCACACACCCGTGAACCTATGGCCTTCGAGTCCGAAACGACTCGGGGCAACCATTTTTACCCACTCTGTAAAAGAATGTTTAAAACGCGTAAAGCAAA
>469 a20ogrp_21554
CAGAGTTGCAAAACTCCCAACCATTGTGAACCTACCTCACCGTTGCTTCGGCGGGTGGCCCGGGGCAACCCAGGCCGCGCCGGCTCCCCTCGCGGAGCTGGCACCCCGTCAGAGGCCCCTAAACCCTTGCATATTGGCCTCTCTGAGTAACTTATACAATAAGTCA
>47 a20igrp_6173
ATGGGTTAACGCCTTCGGGCACAATCCCCACCCTTTGTAACTGCGGCCCGGATTCGGCGCCTGGCGGGGAGTCCCCTCTGTTCGCGGAGGGCCCCGCCTGCCGGAATTAGCCAACCCTGCCTAGAAAATTGAAGTCTGAGAACAAGTTAAATTAAACA
>470 a15ogrp_7675
AAGAGAACTGCCTTCGGGCTAATCTCCCACCCTTTGTTTACATTACCTTTGTTGCTTTGGCAGGCCCGTCTTCGGACCGCTGGCTTCGGCTAGTCCGCGCCTGCCAGAGGACCCCAAACTCATATTATTTATGTCGTCTGAGTACTATATAATAGTTA
>471 a2j_23000
TTAAATGTACAGCCGGCTCTCCTTTCGGGGATTGAGCTAGCTACCAACCCCTTGTGAACTGTAATCGTATCTGGGCAGCCGGTTTGCGCTATGTATATAGCAAGAGCTACTGCCCGACTATATTAAAAACCCCTTTATAATTTGACTGACTTGAGATATAAAAGAGAAA
>472 a7ogrp_13095
TCGTGGGGATTCGTCCCCTCTAGATAGACACCCTTTGTTCATGAGTACCAATTGTTTCCTCGGCGGACTTGCTCGCCGTTGGACAACCAAAAACCTTTATAGTAGCAGTATCTTCAGTTAAAAAATAAATATTA
>473 a19ogrp_20443
ATAATAAGTGTTTTATGGCACTTTTTAAATCCATATCCACCTTGTGTGCAATGTCAGTCGATCTTCTTCATGGAGATCGACCAAACATCAACCTTTATTTTTTAACTCTTTGTCTAGAAAAATATTATGAATAAACAATTCAAAATA
>474 a2c_21577
ATGAATTTGGGTACTCTTAATTGAGGCCCGACCTTCATCCTTCTACCCTGTGAACTATTTATCAATCGATCGGACCCGGAAGGGTCGCAGATTGGTTATCATTTTTAAACTCTACAAAAGTCAAAGAATGTTATACAAATTTTATAATCAAATA
>475 a120grp_14963
CAGAGTTACACAAACTCCCAAACCCCCTGTGAACTATACCTATCAGTTGCTTCGGCGGCGCGTCCCCGGACCCCCTCGCGGGACCCGGACCCTGGCGCCCGCCGGAGGCCACTCAAACCCTGTTTATACAGTGTATCTCTGATTATAACAAACAAATGAATCA
>476 a11ogrp_11492
CAAATCTTTGGGGGCTAGCCGCTGTGAATAGCAGTGTGCTGGTCTCACATTAGCACAAGGCCGCAAGGCCTTGATGTTTACGCTTGTTTGTTTGACAGAGTTAGTTGAGAATAAAAATAAAGA
>477 a1igrp_1359
GGGGGAGGATTAGAGAGAGAGTTGGGATGTGAAAGGACGACAGCATATGCATTTTAAACAGCTAATCAAA
>478 a9c_27694
CAAATCTTTTGCGAGTCCTGCGTGCTTAACCGTGCGCAGTTCTCACAACATTAGCACAAGGTCGCAAGATCTTGATGTTTACGCTTGTATGTTTGACAGAGTTAGTTGAGAATAAATAAGGA
>479 a5b_765
CAAGGTTCTGTAGGTCTGTCGCAACGACATCGACTCTACTACTTACGCGTGTTGTGGTTTCGACAGGACGTTATA
>48 a15igrp_5864
ATAATAAGTGTTTTATGGCACTTTTTAAATCCATATCCACCTTGTGTGCAATGTCAGTCGATCTTCTTCATGGAGATCGGCCAAACATCAACCTTATTTTTTAACTCTTTGTCTGAAAAATATTATGAATAAACAATTCAAAATA
>480 a4a_15892
ATGAGAACTTGCCCTTACGGGTAGATCTCCCACCCTTTGTTTATTATACCTTTGTTGCTTTGCTAGGCCCGTCCTCGGACCGCCGGCTTCGGCTGGCCAGCGCCTGGCAGAGGACCCAAACTCTTTTATTATTGTCGTCAGAGTACTATATCAATAGTTA
>481 a5i_27589
ATGGATTTGAAGGACGTTCTTTTTAGAAGTCCGACCTCTTCATTTCCTTACACCGTGCACACACTTCTTTTTTACACCATTTTTAACACATTAGTATAAGAATGTAATCAGTCTCTTAATTGAGCATAAAACAAATA
>482 a5a_7566
CCGTTGGAGCTTGCTCCATCTGGGATAGACACCCTTGATTTTGAGTACCTTTTCGTTTCCTCGGCGGGCTCGCCCGCCGGTGGACAACCATAAACTCTTTGTAATAGCAGTATCTTCTGAGAAAAACAAATAGTCA
>483 a2igrp_16814
ATGAGCGAGCCGAAAGGCAAGCATAATATCCATAACACTGTGAACTGTTGGCTTCGGCCAAATTTTTTACAAACTTTGTGTAATGAACGTAAAATACTATAATCAATA
>484 a20ogrp_285
CCGAGTTTACAACTCCCAAACCCCTGTGAACATACCTTATGTTGCCTCGGCGGATCAGCCCGCGCCCCGTAAAACGGGACGGCCCGCCGCAGGAACCCCAAACTCTGTTTTTAGTGGAACTTCTGAGTATAAAAACAAATAAATCA
>485 a4d_16431
AAGAGAACTTGCCCTTCGGGGTAGATCTCCCACCCTTTGTTTATCATACTTTGTTGCTTTGGCGGGCCTGCCTCACGGCTGCTGGCGCAAGCTGGCTCGTGCCCGCCAGAGACCCCTAAACTCTGAATATTGTCGTCTGAGTAATATATAATAAGTTA
>486 a9igrp_7936
ATGAATAAACTTGGCTAAGTTGTTGCTGGCTCTTTGAGCATGTGCACGCTTAGTCCATCTTTAACCACCTGTGCACCTTCTGTAGGTCTGTGATCTCGAGGAATGGTCAATGTGCTGAGCGAAAGCTAGCTTTCCTTCCTTGTGTGACCAGATCTATGTCTTTATATACCCCATATGAATGTATTCGAATGTCGTAATTGGCCTAGTGCCTTTTAAATCAAATA
>487 a9igrp_4781
CTGAGTTATAACAAACTCCCAAACCCATGTGAACATACCTTTTGTTGCTTCGGCGGGATCGCCCCGGGTGCCGGTTCGTCCGCGCCCCGGAGTCAGGCGCCCGCCAGAGGACCTAAACTATTGTATTCTTGAGAATCTCTGAGTGGATTACACAAATAATCA
>488 a11ogrp_5168
ATTACGAAAGCTATAGCCCCTTCGGGGGTTATTGCATCCACCCTTTGTCTACTTGTACCTCTTGTTGTTTCCTCGGCAGGCTTGCCTGCCGCTAGGAACCCCTTAAACTCTTGTATTTACAGTATTAAAATCTCTGATAACTATTTAAATTATTA
>489 a10igrp_6588
TCGTGCAACAGAGGCGCGAGGGCTGTCGCTGACTTGAAAAGGTCGTGCACGCCTGAGCGCTCTCACGCATCCATCTCACCCCTTTGTGAACCACCGCGTGGGTCGTCCTCCGGGCGGCTTGCGTTTTTACAAAAACCCCAGTATTAGAATGTTTTACCGTTTGCGGTGACACGCAATCAATA
>49 a20ogrp_6514
CCGAGTTGTGGAAACACAATCTCCCTTTCTTGTTGTTTGACCGGTTGCCTTGCCTTCGGGCAGGATTATTCTGAATCAGTGTCGTCTGAGTACTTTTATAATACTATA
>490 a8b_19586
ATGAAATGTTTGTCGTGAAGGGTTGTAGCTGGCCCCCCTGGGGCACACGTGCACGCCCGGATCGCATCCACCTCCAACACCTGTGCACAACCTGTAGCCTGGGATGATCACGAGGCCCTCGTTGGCCGCGAATGCCCTCGTCTATGAGTATTTCACACACACCAGCAGTCACATGGAATGTACACACGAAGCGTCTAACAAGCGCGATGAATA
>491 a17ogrp_4986
CAGAGTTGCAAAACTCCCAACCATTGTGAACCTACCTCACCGTTGCTTCGGCGGGTGGCCCCGGGGCAACCCGGAGCCGCGCCGGCCCCGCTCCCGGGGCCCGGCAAACCCGTCAGAAGACCGAAACTCTTCGTCATCAGTGGCCTCTCTGAGTAACTTATACAATAAGTCA
>492 a3igrp_11869
ATAATAAAGTGTTTTATGGCACTTTTTAAAAATCCATATCCACCTTGTGTGCAATGTTAGATCTCGTCAATCTTGGCGAGATTTTTATACATCAACTCATTCTTTAACTAATTTGTCTGAAAAATATTATGAATACTTAATTCAAAATA
>493 a2ogrp_12468
CAGAGTTTACAACTCCCAAACCCTATGTGAACATACCTCTTGTTGCTTCGGCGGACCCGCCCCGGCGTCCGGACGACCTAGCGTCGCCCGCGGCCCGGATCCAGGCGGCCGCCGGAGACCATCAAACTCTTTGTATTATTAGAATCTTCTGAATTCGCCGCAAGGCAAAACAAATGAATCA
>494 a2i_15699
CAAATCTTTTGCGAGTCTGCGTGCTTTACCGCCGTAGCACTCACAACATTAGCACAAGGTCGCAAGGCCTTGATGTTTACGCTTGTTTGTTTGACAGATTTAGTTGAGAAATAAAAAAGA
>495 a5i_11173
CTGAGTTACCGCTCTATAACCCTTTGTGAACATACCTAACTGTTGCTTCGGCGGGCAGGAGGACGACCCCCCACCGCGGGGGCGGTCCCCCTCCCGGCCGCGCCCCACCGGGCGTGGCGCCCGCCGGAGGATACCAAACTCTATTTCAACGACGTTTCTTCTGAGTGGCACAAGCAAATAATTA
>496 a5d_15023
CAATCTTGAGAGCTGTGTGCGTTACCGGTGCGCGGAGTGACTCTACATTAGCACTAGGGTCGCAACGACTCTGACTGTTTACGCTTCGTTTGTTTGACTAGAGTTAGGTTCG
>497 a4a_12181
CAGTATGATTAGAGGGGTTGAGCTGGCCTTTGGGCATGTGCTTACCTCTCGACTTCAATCCACATACACCTGTGAACCCATGGCTTGTCAGTCTCCCAGTCCCGACAAAGGGCTGCGGTTCCGGTTTTTCCGGAATTTTGAGGCCGACTTGTCATCACTTTTATAACTAATACCAAGTTAAATGCATGTTTATCTGCTCTACGGAGCATTAATAAAAATA
>498 a6igrp_972
TCAGTTTGATAACCCGGTTTTGTGCTCTTATGTAACTATTTTGTGATTTGCTTGGTCAGTTAAATTTA
>499 a1igrp_16866
[truncated: 1,105 more rows]
